# Supplementary material for: Altered neutrophil extracellular traps in response to Mycobacterium tuberculosis in persons living with HIV with no previous TB and negative TST and IGRA
Source: bioRxiv preprint, doi:10.1101/2023.04.19.537498, version 1 (2023-04-21)
Supplement: Supplementary table 3 [file 537498_file03.pdf]

Supplementary table 3 : Differential gene expression testing results

| Ensembl ID       | Gene     | Average Expression All | Log2FC Expression values |              |                   |                   | Adj.P.Value  | Log2FC Expression values |              |                   |                   | Adj.P.Value |
|------------------|----------|------------------------|--------------------------|--------------|-------------------|-------------------|--------------|--------------------------|--------------|-------------------|-------------------|-------------|
|                  |          |                        | HITIN 1h inf             | HIT 1h inf   | HITTINxHIT 1h inf | HITTINxHIT 1h inf |              | HITTIN 6h inf            | HIT 6h inf   | HITTINxHIT 6h inf | HITTINxHIT 6h inf |             |
| ENSG000000013810 | TACC3    | 6.290964045            | -0.002851691             | -0.012062479 | 0.009210788       | 0.999933887       | -0.920121901 | -2.064248081             | 1.14412618   | 4.0e-08           |                   |             |
| ENSG000000198728 | LDB1     | 6.566098921            | -0.018328008             | -0.022618037 | 0.004290029       | 0.999933887       | -0.537086423 | -1.179098795             | 0.642012372  | 4.1e-08           |                   |             |
| ENSG000000163950 | SLBP     | 4.391521096            | 0.007184897              | -0.067021321 | 0.074206218       | 0.999933887       | -1.092490973 | -2.271706574             | 1.179215602  | 4.1e-08           |                   |             |
| ENSG000000114770 | ABCC5    | 4.598229697            | -0.04577187              | -0.007035407 | -0.038736463      | 0.999933887       | -1.107346016 | -0.38288356              | 0.724624656  | 1.55e-07          |                   |             |
| ENSG000000154889 | MPPE1    | 4.986227645            | -0.060510226             | -0.04892043  | -0.011589796      | 0.999933887       | -0.956374604 | -2.120342821             | 1.163968216  | 1.55e-07          |                   |             |
| ENSG000000148411 | NACC2    | 4.429865479            | 0.028911995              | -0.028333317 | 0.057245312       | 0.999933887       | -0.686865258 | -1.720275735             | 1.033410477  | 1.55e-07          |                   |             |
| ENSG000000115525 | ST3GAL5  | 3.212199503            | 0.024936133              | 0.056258708  | -0.031322575      | 0.999933887       | -0.909640132 | -2.028942914             | 1.119302783  | 1.55e-07          |                   |             |
| ENSG000000114650 | SCAP     | 5.894223641            | 0.00407177               | 0.000219602  | 0.003852167       | 0.999933887       | -0.693582353 | -1.491069581             | 0.797487227  | 2.04e-07          |                   |             |
| ENSG000000186469 | GNG2     | 7.636126174            | -0.086645275             | -0.039984134 | -0.046661142      | 0.999933887       | 1.689878598  | 2.786825127              | -1.096946529 | 2.83e-07          |                   |             |
| ENSG000000136490 | LIMD2    | 8.224782826            | 0.046063834              | 0.020552663  | 0.02551117        | 0.999933887       | -0.334981953 | -1.088005044             | 0.753023091  | 3.77e-07          |                   |             |
| ENSG000000175115 | PACS1    | 7.156963363            | 0.017294307              | 0.023147182  | -0.005852875      | 0.999933887       | -0.389540031 | -1.115206526             | 0.725666495  | 4.56e-07          |                   |             |
| ENSG000000149177 | PTPRJ    | 8.105117631            | 0.003543127              | -0.02488696  | 0.028430087       | 0.999933887       | 0.993095255  | 1.778970509              | -0.785875254 | 5.85e-07          |                   |             |
| ENSG000000176454 | LPCAT4   | 3.751378867            | -0.076903478             | 0.084847201  | -0.161750679      | 0.999933887       | -0.215394507 | -0.926666514             | 0.711272007  | 7.08e-07          |                   |             |
| ENSG000000097033 | SH3GLB1  | 7.561685911            | -0.037566006             | -0.061047052 | 0.023481046       | 0.999933887       | 0.055818994  | 0.609377741              | -0.553558747 | 7.28e-07          |                   |             |
| ENSG000000142599 | REER     | 7.11115304             | -0.001125043             | 0.025483521  | -0.026608564      | 0.999933887       | -0.879698007 | -1.831034039             | 0.951345402  | 7.28e-07          |                   |             |
| ENSG000000126882 | FAM78A   | 4.354335938            | 0.035132925              | 0.020032206  | 0.015281719       | 0.999933887       | -0.360049992 | -1.140014822             | 0.77996483   | 8.67e-07          |                   |             |
| ENSG000000077420 | APBB1P   | 7.011032353            | 0.068260876              | 0.038463138  | 0.029797738       | 0.999933887       | -0.644671435 | -1.358051197             | 0.713379763  | 1.247e-06         |                   |             |
| ENSG000000148660 | CAMK2G   | 6.00175391             | -0.019914597             | 0.019206591  | -0.039121189      | 0.999933887       | -0.485044854 | -1.247596411             | 0.762551557  | 1.247e-06         |                   |             |
| ENSG000000130475 | FCHO1    | 5.369262812            | 0.067658605              | 0.054474871  | 0.013183734       | 0.999933887       | -0.62047067  | -1.578634166             | 0.958163497  | 1.403e-06         |                   |             |
| ENSG000000168906 | MAT2A    | 5.788810601            | -0.12898742              | -0.053301496 | -0.075865924      | 0.999933887       | -0.404587622 | -1.00400006              | 0.599412978  | 1.405e-06         |                   |             |
| ENSG000000132359 | RAP1GAP2 | 6.965216034            | -0.055247579             | 0.034752219  | -0.089999798      | 0.999933887       | -0.5328804   | -1.334797713             | 0.801917313  | 2.145e-06         |                   |             |
| ENSG000000198909 | MAP3K3   | 6.925593001            | 0.006309852              | 0.032385554  | -0.026075702      | 0.999933887       | -0.923243447 | -1.751441154             | 0.828197708  | 2.245e-06         |                   |             |
| ENSG000000065809 | FAM107B  | 7.626215891            | -0.049455645             | 0.020092221  | 0.008636576       | 0.999933887       | 0.950935916  | 1.58013648               | -0.629200565 | 2.469e-06         |                   |             |
| ENSG000000173020 | GRK2     | 8.540296719            | 0.045699309              | 0.06557417   | -0.019874861      | 0.999933887       | -0.358906437 | -0.959921588             | 0.601015151  | 2.469e-06         |                   |             |
| ENSG000000169220 | RGS14    | 6.20992342             | 0.041852281              | 0.115571347  | -0.073719066      | 0.999933887       | -0.548504028 | -1.459109152             | 0.910605124  | 2.469e-06         |                   |             |
| ENSG000000172375 | C2CD2L   | 3.480366741            | 0.013879221              | 0.174006408  | -0.160127187      | 0.999933887       | -0.334832564 | -1.034191303             | 0.699358739  | 2.469e-06         |                   |             |
| ENSG000000082212 | ME2      | 4.529195555            | 0.022371314              | 0.023416201  | -0.001044887      | 0.999933887       | -0.846288138 | -1.593121487             | 0.746833348  | 3.069e-06         |                   |             |
| ENSG000000106608 | URGCPC   | 3.230348518            | -0.04418902              | 0.036972839  | -0.081161858      | 0.999933887       | 1.405187847  | 2.295210356              | -0.890022509 | 3.854e-06         |                   |             |
| ENSG000000130699 | TAF4     | 3.786223363            | 0.015236879              | 0.00686351   | 0.006553362       | 0.999933887       | -0.455188327 | -1.220182054             | 0.764993727  | 3.854e-06         |                   |             |
| ENSG000000168918 | INPP5D   | 7.718757251            | 0.005114308              | 0.009818274  | -0.004703966      | 0.999933887       | -0.323458024 | -0.807702399             | 0.484244374  | 4.0e-06           |                   |             |
| ENSG000000178104 | PDE4DIP  | 4.264688646            | 0.032511927              | -0.143211394 | 0.175723321       | 0.999933887       | 1.015127346  | 1.794306972              | -0.779179626 | 4.628e-06         |                   |             |
| ENSG000000198231 | DDX42    | 5.363265192            | -0.034808736             | -0.074098825 | 0.039290089       | 0.999933887       | -0.321010591 | -0.881219363             | 0.560208773  | 4.65e-06          |                   |             |
| ENSG000000146083 | RNF44    | 7.444209072            | 0.008016684              | 0.030678566  | -0.022662882      | 0.999933887       | -0.499370932 | -1.070723227             | 0.577652295  | 4.65e-06          |                   |             |
| ENSG000000167895 | TMC8     | 6.777299354            | -0.001634845             | 0.034679133  | -0.036313978      | 0.999933887       | -0.472444916 | -1.143139929             | 0.670695014  | 5.27e-06          |                   |             |
| ENSG000000133943 | DGLUCY   | 6.132360015            | -0.00185521              | 0.005003189  | -0.006858711      | 0.999933887       | -0.218912398 | -0.742483791             | 0.523571473  | 5.325e-06         |                   |             |
| ENSG000000123329 | ARHGAP9  | 8.165973367            | -0.007638712             | -0.00276802  | -0.004870692      | 0.999933887       | -0.66738706  | -1.185433816             | 0.518046558  | 5.845e-06         |                   |             |
| ENSG000000198444 | AFTPH    | 7.209865128            | -0.046276039             | -0.115350506 | 0.069074907       | 0.999933887       | 0.439159178  | 0.924483618              | -0.485329138 | 6.045e-06         |                   |             |
| ENSG000000088833 | NSFL1C   | 5.661026915            | 0.002455419              | -0.011287075 | 0.013742495       | 0.999933887       | -0.458833826 | -0.987479167             | 0.528645342  | 6.357e-06         |                   |             |
| ENSG000000075420 | FNDC3B   | 6.237662676            | -0.0133526               | 0.004402784  | -0.017755384      | 0.999933887       | 1.197128388  | 1.898007669              | -0.700879281 | 6.799e-06         |                   |             |
| ENSG000000169231 | THBS3    | 3.35581999             | -0.008361998             | -0.008361016 | 0.999933887       | -0.389862815      | -1.030149636 | 0.640287121              | 0.7538e-06   |                   |                   |             |
| ENSG000000172932 | ANKRD13D | 7.146472498            | 0.057239192              | 0.097639191  | -0.040399999      | 0.999933887       | -0.490647134 | -1.121310456             | 0.630663322  | 7.652e-06         |                   |             |
| ENSG000000172934 | RAB37    | 5.656575342            | 0.017405499              | -0.017140746 | 0.034546245       | 0.999933887       | -0.393957541 | -1.127790842             | 0.738333302  | 7.652e-06         |                   |             |
| ENSG000000197142 | ACSL5    | 6.375869596            | 0.011310521              | -0.055101964 | 0.066412485       | 0.999933887       | 1.221588824  | 1.841295156              | -0.619706332 | 1.005e-05         |                   |             |
| ENSG000000136280 | CCM2     | 6.106257077            | -0.03415799              | 0.054801455  | -0.088959445      | 0.999933887       | -0.777418987 | -1.50719577              | 0.729776783  | 1.0254e-05        |                   |             |
| ENSG000000084070 | SMAP2    | 8.502520365            | 0.021460197              | 0.014435331  | 0.007024866       | 0.999933887       | -0.571759356 | -1.248351251             | 0.676591896  | 1.045e-05         |                   |             |
| ENSG000000061938 | TNK2     | 6.16439929             | 0.03391351               | 0.075237887  | -0.041324373      | 0.999933887       | -0.456161307 | -1.179131668             | 0.722970352  | 1.057e-05         |                   |             |
| ENSG000000072336 | NFATC3   | 4.746903342            | 0.005816827              | 0.016761045  | -0.010944217      | 0.999933887       | -0.708766503 | -1.584622955             | 0.875856442  | 1.0571e-05        |                   |             |
| ENSG000000143418 | CERS2    | 5.242249155            | 0.076751762              | 0.088002973  | -0.011251211      | 0.999933887       | -0.503960036 | -1.108604218             | 0.604644181  | 1.0619e-05        |                   |             |
| ENSG000000122515 | ZMIZ2    | 6.094058829            | 0.056423391              | 0.023522079  | 0.032901312       | 0.999933887       | 0.987495903  | 1.606907823              | -0.619411921 | 1.0619e-05        |                   |             |
| ENSG000000127663 | KDM4B    | 6.902984478            | -0.036326011             | 0.021069235  | -0.057395246      | 0.999933887       | -0.3991995   | -1.045417531             | 0.846228031  | 1.0619e-05        |                   |             |
| ENSG000000149289 | ZC3H12C  | 4.1250693              | -0.02985739              | -0.04336922  | 0.01351183        | 0.999933887       | 1.120532112  | 1.944860009              | -0.824327897 | 1.0619e-05        |                   |             |
| ENSG000000107776 | AKAP13   | 7.855959673            | -0.033706668             | -0.039203124 | 0.005496456       | 0.999933887       | 0.404817359  | 1.014002547              | -0.609185187 | 1.1278e-05        |                   |             |
| ENSG000000124496 | TRERF1   | 5.660039947            | -0.002085982             | 0.036342486  | -0.038428468      | 0.999933887       | -0.2960214   | -0.862413658             | 0.566392257  | 1.1278e-05        |                   |             |
| ENSG000000164938 | TP53INP1 | 5.951823499            | -0.03912612              | -0.012460146 | -0.026665974      | 0.999933887       | -0.821019442 | -1.388679632             | 0.56766019   | 1.1755e-05        |                   |             |
| ENSG000000108479 | GALK1    | 2.938215054            | 0.035637383              | 0.010113401  | 0.025523982       | 0.999933887       | -0.840456606 | -1.821683368             | 0.981227032  | 1.1755e-05        |                   |             |
| ENSG000000114446 | IFT57    | 3.614690425            | -0.067203241             | -0.006070716 | 0.08803919        | 0.999933887       | 1.225060033  | 2.118661648              | -0.893601618 | 1.3402e-05        |                   |             |
| ENSG000000197024 | ZNF398   | 3.661984467            | -0.060360522             | -0.013476937 | -0.046883585      | 0.999933887       | -1.060979036 | -2.001919911             | 0.940940875  | 1.4634e-05        |                   |             |
| ENSG000000124067 | SLC12A4  | 4.159691512            | 0.051831849              | 0.03428606   | 0.017545789       | 0.999933887       | -0.736896536 | -1.559236391             | 0.822239855  | 1.4772e-05        |                   |             |
| ENSG000000187109 | NAP1L1   | 6.509610016            | -0.077393259             | -0.114708733 | 0.037315114       | 0.999933887       | 0.227178643  | 0.685234027              | -0.458055384 | 1.7612e-05        |                   |             |
| ENSG000000129911 | KLF16    | 4.350480746            | 0.113846363              | 0.167121941  | -0.053275578      | 0.999933887       | -1.068546571 | -2.102400418             | 1.033853847  | 1.8637e-05        |                   |             |
| ENSG000000072724 | TFRC     | 6.715511047            | -0.052872074             | -0.072672126 | 0.019800048       | 0.999933887       | 1.066976556  | 1.83596925               | -0.768992693 | 1.8637e-05        |                   |             |
| ENSG000000167522 | ANKRD11  | 7.652069794            | -0.008438045             | -0.025374392 | 0.016936347       | 0.999933887       | -0.403440064 | -0.784640018             | 0.381199955  | 1.8637e-05        |                   |             |
| ENSG000000178764 | ZHX2     | 6.062754902            | -0.022794807             | -0.014171798 | -0.008623009      | 0.999933887       | 1.048461858  | 1.636783233              | -0.588321375 | 1.9029e-05        |                   |             |
| ENSG000000261221 | ZNF865   | 4.581461258            | 0.088814707              | -0.017832338 | 0.106647045       | 0.999933887       | -0.670236674 | -1.443582102             | 0.773345428  | 1.934e-05         |                   |             |
| ENSG000000170266 | GLB1     | 3.989794072            | -0.010154649             | -0.029577025 | 0.19422376        | 0.999933887       | -0.574528202 | -1.170358383             | 0.595857631  | 1.934e-05         |                   |             |
| ENSG000000185963 | BICD2    | 5.246686351            | 0.003997328              | 0.074577185  | -0.070579856      | 0.999933887       | -0.857017    | -1.604623298             | 0.747606298  | 1.934e-05         |                   |             |
| ENSG000000161980 | POLR3K   | 1.986842638            | 0.069435916              | -0.155579532 | 0.225015448       |                   |              |                          |              |                   |                   |             |

|                  |            |              |              |              |              |             |              |               |              |             |
|------------------|------------|--------------|--------------|--------------|--------------|-------------|--------------|---------------|--------------|-------------|
| ENSG00000116685  | KIAA2013   | 5.196244863  | 0.072549181  | 0.014480546  | 0.058068635  | 0.999933887 | -0.601427321 | -1.324402741  | 0.722975421  | 5.1573e-05  |
| ENSG00000106144  | CASP2      | 4.334164006  | -0.011239216 | -0.071730569 | 0.060491353  | 0.999933887 | -0.218176748 | -0.77462884   | 0.556452093  | 5.1573e-05  |
| ENSG00000031081  | ARHGAP31   | 2.917786361  | 0.017044277  | 0.028884149  | -0.011839871 | 0.999933887 | 1.852292041  | 2.916988934   | 1.064698693  | 5.1573e-05  |
| ENSG00000091542  | ALKB5      | 5.248493509  | 0.058733965  | 0.016972187  | 0.041761778  | 0.999933887 | -0.318851633 | -0.883247477  | 0.564395844  | 5.2874e-05  |
| ENSG00000181192  | DHTKD1     | 3.810553508  | -0.024623433 | -0.032545574 | 0.007922141  | 0.999933887 | -0.86826476  | -1.660973322  | 0.792708562  | 5.3299e-05  |
| ENSG00000122359  | ANXA1      | 8.184550833  | -0.017245939 | 0.001235212  | -0.018481151 | 0.999933887 | -0.32552756  | -0.774590883  | 0.449063322  | 5.4974e-05  |
| ENSG00000180992  | MRPL14     | 2.299509152  | 0.016393501  | 0.096547399  | -0.080153898 | 0.999933887 | 1.293195975  | 2.057455967   | -0.764259992 | 5.4974e-05  |
| ENSG00000070413  | DGCR2      | 5.979323245  | 0.009887424  | 0.007767047  | 0.017654471  | 0.999933887 | -0.453665715 | -1.14662462   | 0.692958905  | 5.4974e-05  |
| ENSG00000275131  | AC241952.1 | 2.358888181  | -0.104409698 | -0.013737424 | -0.090672273 | 0.999933887 | 0.435835947  | 1.033259323   | -0.597423376 | 5.6213e-05  |
| ENSG00000023892  | DEF6       | 6.218974363  | 0.029219153  | 0.069277476  | 0.040058323  | 0.999933887 | -0.238078285 | -0.77777757   | 0.538699284  | 5.6213e-05  |
| ENSG00000279369  | AC046185.3 | 2.630421058  | 0.02849853   | 0.062661143  | -0.034162613 | 0.999933887 | -0.449390993 | -1.335433753  | 0.886042759  | 5.6213e-05  |
| ENSG00000104915  | STX10      | 5.332392688  | 0.04363254   | 0.026144329  | 0.017488211  | 0.999933887 | -0.562711525 | -1.398504423  | 0.835792898  | 5.6302e-05  |
| ENSG00000152804  | HHEX       | 3.003777197  | -0.119276793 | 0.011368368  | -0.130645161 | 0.999933887 | -1.346938269 | -2.434663502  | 1.087725233  | 5.6527e-05  |
| ENSG00000108306  | FBXL20     | 4.689349271  | -0.029796973 | 0.109142475  | -0.138939448 | 0.999933887 | -0.663461024 | -1.302255225  | 0.638794201  | 5.959e-05   |
| ENSG000000089159 | PXN        | 7.629933757  | 0.010099607  | -0.024240581 | 0.034340189  | 0.999933887 | -0.823778252 | -1.376827166  | 0.553048914  | 6.0851e-05  |
| ENSG00000189339  | SLC35E2B   | 5.428709483  | 0.026469614  | -0.055181045 | 0.081650659  | 0.999933887 | -0.221047606 | -0.593639688  | 0.372592082  | 6.1934e-05  |
| ENSG00000263528  | KBKE       | 3.867450284  | -0.013214348 | -0.091023642 | 0.061879295  | 0.999933887 | 1.181051084  | 2.188857082   | -1.007805997 | 6.3123e-05  |
| ENSG00000242247  | ARFGAP3    | 6.822814623  | 0.005662773  | -0.090122531 | 0.095785125  | 0.999933887 | 0.886759053  | -0.471130508  | 0.36767e-05  | 6.3676e-05  |
| ENSG00000141401  | IMPA2      | 4.690593141  | -0.007905947 | -0.021418954 | 0.013513007  | 0.999933887 | -1.158802175 | -2.345322103  | 1.186519927  | 6.3676e-05  |
| ENSG00000144597  | EAF1       | 6.603504729  | -0.007865281 | 0.019469745  | 0.011604464  | 0.999933887 | 1.198690172  | 1.736121725   | -0.537413553 | 6.5127e-05  |
| ENSG00000112576  | CND3       | 6.348766398  | 0.089999466  | 0.072026484  | 0.017972981  | 0.999933887 | -0.450282406 | -1.068681119  | 0.618578713  | 6.6879e-05  |
| ENSG00000153029  | MR1        | 5.037120279  | -0.008860535 | -0.018056652 | 0.009196117  | 0.999933887 | 0.435331069  | -0.478531909  | 0.69080e-05  | 6.6908e-05  |
| ENSG00000123610  | TNFAIP6    | 7.671591934  | -0.006760387 | 0.057575992  | -0.064336379 | 0.999933887 | 3.099319565  | 4.070842057   | -0.971522492 | 6.6908e-05  |
| ENSG00000110697  | PITPNM1    | 6.636056624  | 0.112352551  | 0.053770388  | 0.058582163  | 0.999933887 | -0.351277263 | -0.893326514  | 0.542049251  | 6.8159e-05  |
| ENSG00000166523  | CLEC4E     | 7.983767691  | -0.01256623  | 0.027778094  | -0.040347174 | 0.999933887 | 1.993097714  | 2.5572695     | -0.564178786 | 6.8159e-05  |
| ENSG000002071601 | LIX1L      | 3.074129974  | -0.01591519  | 0.009927599  | -0.025842789 | 0.999933887 | -0.188866361 | -0.823331048  | 0.634464686  | 7.1027e-05  |
| ENSG00000125730  | C3         | 4.290919655  | 0.059465496  | -0.049403284 | 0.10868768   | 0.999933887 | 2.166974178  | 0.304212042   | -0.867237864 | 7.2381e-05  |
| ENSG00000204713  | TRIM27     | 4.667633302  | 0.036192169  | -0.086008445 | 0.122200614  | 0.999933887 | -0.388922443 | -0.956906405  | 0.567983961  | 7.6819e-05  |
| ENSG00000187257  | RSBN1L     | 4.572085456  | 0.011871371  | 0.023859848  | -0.011988476 | 0.999933887 | -0.822891909 | -1.548249568  | 0.72357658   | 7.9437e-05  |
| ENSG00000121578  | B4GALT4    | 3.361789483  | -0.03500484  | -0.083963073 | 0.048958233  | 0.999933887 | 0.925886906  | 1.481551297   | -0.555664391 | 7.9813e-05  |
| ENSG00000123240  | OPTN       | 4.964283456  | 0.019374357  | -0.155232357 | 0.174606895  | 0.999933887 | 0.548645245  | 1.086644448   | -0.537999403 | 8.1278e-05  |
| ENSG00000167552  | TUBA1A     | 7.94142701   | -0.042793738 | -0.088039737 | 0.045245998  | 0.999933887 | -0.715743104 | -1.398062696  | 0.682319592  | 8.14e-05    |
| ENSG00000139613  | SMARCC2    | 5.539934014  | 0.019094683  | 0.074318512  | -0.055223829 | 0.999933887 | -0.406135569 | -0.837695655  | 0.431560997  | 8.14e-05    |
| ENSG00000160285  | LSS        | 4.285526782  | -0.018440629 | 0.090762359  | -0.109202988 | 0.999933887 | 2.109705668  | 3.229635513   | -1.119929846 | 8.14e-05    |
| ENSG00000104974  | LILRA1     | 4.290693708  | 0.001177589  | -0.038137169 | 0.039314758  | 0.999933887 | -1.28278991  | -2.261615323  | 0.978825413  | 8.14e-05    |
| ENSG00000196782  | MAML3      | 4.001320772  | -0.073558127 | 0.031949396  | -0.105507522 | 0.999933887 | -0.393930238 | -0.98721309   | 0.593282852  | 8.1771e-05  |
| ENSG00000113368  | LMNB1      | 6.680646682  | -0.046376509 | -0.065779988 | 0.01940339   | 0.999933887 | 0.651980356  | -0.495787949  | 0.23866e-05  | 8.2386e-05  |
| ENSG00000110934  | BIN2       | 7.406867867  | 0.003393237  | -0.010796694 | 0.014189931  | 0.999933887 | -0.184319121 | -0.681826507  | 0.497507386  | 8.2386e-05  |
| ENSG00000163050  | COQ8A      | 5.0221133219 | -0.018896949 | 0.0262221704 | -0.045118654 | 0.999933887 | -0.586293826 | -1.238320704  | 0.652026878  | 8.3487e-05  |
| ENSG00000197555  | SIPA1L1    | 6.957835753  | 0.003095388  | -0.049461715 | 0.052557552  | 0.999933887 | 0.338686748  | 0.820855588   | -0.48198684  | 8.3487e-05  |
| ENSG00000091640  | SPAG7      | 4.472679426  | 0.051224162  | 0.041107685  | 0.010116477  | 0.999933887 | 0.730351348  | 1.203792348   | -0.473441    | 8.444e-05   |
| ENSG00000099991  | CABIN1     | 5.67584602   | 0.020933027  | 0.049385252  | -0.028452225 | 0.999933887 | -0.098379209 | -0.617258916  | 0.518879707  | 8.5579e-05  |
| ENSG00000105939  | ZC3HAV1    | 6.109419084  | 0.012615292  | -0.09398765  | 0.106602941  | 0.999933887 | -0.385110172 | -0.838310077  | 0.453199905  | 8.5579e-05  |
| ENSG00000066294  | CD84       | 5.440471952  | -0.018766682 | -0.120810176 | 0.102041494  | 0.999933887 | 0.294825836  | 0.940508619   | -0.645682983 | 8.6003e-05  |
| ENSG00000240849  | PEDS1      | 2.338072948  | -0.009268574 | 0.014826672  | -0.051095246 | 0.999933887 | 0.399813848  | 1.120367591   | -0.720553203 | 8.7406e-05  |
| ENSG00000103502  | CDIPT      | 5.14461283   | 0.051635765  | -0.026973659 | 0.078609424  | 0.999933887 | -0.4831706   | -1.110995809  | 0.627825299  | 8.9675e-05  |
| ENSG00000124570  | SERPINB6   | 3.394423387  | -0.068544206 | -0.017099973 | 0.003365768  | 0.999933887 | 0.272745849  | 1.061919284   | -0.789173434 | 8.9843e-05  |
| ENSG00000186298  | PPP1CC     | 5.197340673  | -0.039660488 | 0.033208108  | -0.072868596 | 0.999933887 | -0.376431953 | -0.832881125  | 0.456449171  | 9.0564e-05  |
| ENSG00000100342  | APOL1      | 5.066475479  | 0.020492725  | -0.06172811  | 0.082220835  | 0.999933887 | -0.881600206 | -1.511286315  | 0.629686109  | 9.1108e-05  |
| ENSG00000088832  | FKBP1A     | 5.905197263  | -0.068163957 | -0.041480064 | -0.026683893 | 0.999933887 | -0.383000097 | -0.965413562  | 0.582413465  | 9.2691e-05  |
| ENSG00000124256  | ZBP1       | 5.318297747  | 0.015451319  | 0.028634268  | -0.013182949 | 0.999933887 | -0.367032979 | -0.786119739  | 0.41908676   | 9.2691e-05  |
| ENSG00000080371  | RAB21      | 8.036346702  | 0.011944323  | 0.037905317  | -0.025960994 | 0.999933887 | 1.516672385  | 2.010171464   | -0.49349908  | 9.516e-05   |
| ENSG00000214753  | HNRNPUL2   | 3.586903115  | -0.075287413 | -0.056595908 | -0.019327505 | 0.999933887 | -0.457184203 | -1.098218715  | 0.641034512  | 0.000100004 |
| ENSG00000100298  | ARSA       | 5.837957626  | 0.032980544  | 0.010816811  | 0.022163733  | 0.999933887 | -0.288934212 | -0.747442864  | 0.458508652  | 0.000100004 |
| ENSG00000170542  | SERPINB9   | 6.820558712  | 0.003676961  | 0.113572317  | -0.109895357 | 0.999933887 | 2.565527197  | 3.518728957   | -0.95320176  | 0.000100004 |
| ENSG00000178719  | GRINA      | 7.662975626  | 0.038646411  | 0.036445233  | 0.005003877  | 0.999933887 | 1.500602433  | 2.082451341   | -0.581791098 | 0.000101059 |
| ENSG00000125731  | SH2D3A     | 3.661076595  | 0.020906176  | 0.150335957  | -0.129429781 | 0.999933887 | 1.626789012  | 2.519512345   | -0.892723333 | 0.000101059 |
| ENSG00000197912  | SPG7       | 5.831660434  | -0.030046924 | 0.030674666  | -0.06072162  | 0.999933887 | -0.220672906 | -0.346545414  | 0.000102073  | 0.000102073 |
| ENSG00000180891  | CUEDC1     | 3.634562755  | 0.09476964   | 0.065754293  | -0.056277329 | 0.999933887 | -0.392863375 | -1.136434305  | 0.74357003   | 0.000102073 |
| ENSG00000096996  | IL12RB1    | 4.505343621  | 0.003402075  | 0.010827342  | 0.082574734  | 0.999933887 | -0.38277599  | -0.975663608  | 0.592890378  | 0.000104397 |
| ENSG00000111912  | NCOA7      | 3.700613356  | 0.089662344  | -0.082227976 | 0.171890321  | 0.999933887 | -0.707243749 | -1.593417553  | 0.886173805  | 0.000104397 |
| ENSG00000100307  | CBX7       | 5.363080207  | 0.057896487  | -0.004923847 | 0.062820336  | 0.999933887 | -0.638016176 | -1.264594038  | 0.626577862  | 0.000109289 |
| ENSG000002023445 | BIRC3      | 6.421204193  | -0.088746623 | -0.144759827 | 0.056013204  | 0.999933887 | 0.779340429  | -1.0178979315 | -1.018938886 | 0.000114085 |
| ENSG00000163082  | SGPP2      | 3.402664208  | 0.072169955  | 0.134228532  | -0.062058577 | 0.999933887 | 2.267611196  | 3.136170412   | -0.868559217 | 0.000114085 |
| ENSG00000116213  | WRAP73     | 3.532723107  | 0.131608409  | 0.107729019  | 0.02387939   | 0.999933887 | -0.323011888 | -0.824377784  | 0.501365896  | 0.000118976 |
| ENSG00000197183  | NOL4       | 5.112875044  | 0.071452455  | 0.056459665  | 0.01499279   | 0.999933887 | -0.393198451 | -0.836542711  | 0.443344226  | 0.000118976 |
| ENSG00000104880  | ARHGEF18   | 5.135943592  | 0.064915441  | 0.033448324  | 0.031467117  | 0.999933887 | -0.26551078  | -0.786978991  | 0.521465911  | 0.000121859 |
| ENSG00000140443  | IGF1R      | 6.948582491  | -0.060027299 | -0.01588316  | -0.044144139 | 0.999933887 | -0.780791648 | -1.275370769  | 0.494579121  | 0.000123754 |
| ENSG00000232934  | AL157786.1 | 3.026417215  | 0.041150464  | 0.133862996  | -0.092712532 | 0.999933887 | 1.576550003  | 2.268449334   | -0.691899331 | 0.000123754 |
| ENSG00000102951  | IFFO1      | 3.970754318  | -0.011498515 | 0.010990357  | -0.031403912 | 0.999933887 | -0.221712888 | -0.5763315457 | 0.541602569  | 0.000136424 |
| ENSG00000132819  | RBM38      | 5.991726698  | 0.062907836  | 0.016224543  | 0.041283293  | 0.999933887 | -0.344132886 | -0.824140168  | 0.480007282  | 0.000139    |

|                 |          |              |              |               |              |             |              |              |              |             |
|-----------------|----------|--------------|--------------|---------------|--------------|-------------|--------------|--------------|--------------|-------------|
| ENSG00000238227 | TMEM250  | 3.747208982  | 0.065702932  | -0.023351946  | 0.089054878  | 0.999933887 | -0.504419353 | -1.249701776 | 0.745282423  | 0.000215256 |
| ENSG00000166477 | LEO1     | 2.066744486  | -0.071753102 | -0.064423821  | -0.007329281 | 0.999933887 | 0.566903971  | 1.284676792  | -0.717772821 | 0.000223747 |
| ENSG00000262246 | CORO7    | 5.21504005   | 0.015307925  | 0.038076808   | -0.02276888  | 0.999933887 | -0.173068285 | 0.324874714  | -0.324879129 | 0.000223747 |
| ENSG00000164032 | H2A21    | 5.766563792  | 0.002520891  | -0.07981449   | 0.082353581  | 0.999933887 | -0.20648341  | -0.67029474  | 0.46381133   | 0.000223747 |
| ENSG00000204839 | MROH6    | 3.579884365  | 0.116811623  | 0.060763397   | 0.056048226  | 0.999933887 | -0.78492525  | -1.56131998  | 0.77639473   | 0.000225643 |
| ENSG00000166398 | GARRE1   | 3.657842062  | 0.027310631  | 0.11871207    | -0.091401439 | 0.999933887 | -0.139213279 | -0.593874348 | 0.454661069  | 0.000225643 |
| ENSG00000196209 | SIRPB2   | 4.433157527  | -0.03982362  | -0.001358977  | -0.038464643 | 0.999933887 | -0.722619928 | -1.461170698 | 0.73855077   | 0.000227422 |
| ENSG00000100060 | MFNG     | 6.055318048  | -0.020099496 | -0.028167576  | 0.008068079  | 0.999933887 | -0.902707106 | -1.534194412 | 0.631487306  | 0.000227699 |
| ENSG00000165474 | GJB2     | 4.018471658  | 0.184063499  | 0.070394379   | 0.11366912   | 0.999933887 | 1.678213457  | 2.502046137  | -0.82383268  | 0.000228996 |
| ENSG00000175137 | SH3BP5L  | 4.99787894   | -0.065102059 | -0.010215797  | -0.054886282 | 0.999933887 | -0.847646549 | -1.458054322 | 0.610407773  | 0.000228996 |
| ENSG00000123416 | TUBA1B   | 3.855245703  | 0.054544998  | 0.022145335   | 0.032399663  | 0.999933887 | -0.354632706 | -1.025497907 | 0.670865201  | 0.000228996 |
| ENSG00000114353 | GNAI2    | 9.158639486  | 0.04023449   | 0.01855277    | 0.02168172   | 0.999933887 | -0.476032843 | -1.002195513 | 0.52616267   | 0.000228996 |
| ENSG00000108406 | DHX40    | 5.550744809  | -0.024207967 | -0.090557877  | 0.06634991   | 0.999933887 | 0.36465064   | 0.764964832  | -0.400314192 | 0.000228996 |
| ENSG00000122986 | HVCN1    | 3.250315266  | -0.06090454  | 0.004096068   | -0.011006068 | 0.999933887 | -0.731850894 | -1.461740116 | 0.729889222  | 0.000230904 |
| ENSG00000124659 | TBCO     | 4.457067302  | -0.058493622 | -0.175751266  | 0.117257644  | 0.999933887 | -0.427415617 | -0.890898927 | 0.46347421   | 0.000233644 |
| ENSG00000021355 | SERPINB1 | 7.089210047  | 0.051527359  | -0.044536822  | 0.096064181  | 0.999933887 | 1.493446749  | 2.117840147  | -0.624393398 | 0.000239943 |
| ENSG00000048740 | CELF2    | 7.782255196  | 0.055473523  | -0.027244395  | 0.082717919  | 0.999933887 | -0.726154195 | -1.298467065 | 0.572312869  | 0.000241325 |
| ENSG00000135842 | NIBAN1   | 9.195632183  | 0.019526462  | -0.19526462   | 0.047789065  | 0.999933887 | 1.126985936  | -0.591006073 | 0.002413325  | 0.000241325 |
| ENSG00000275302 | CCL4     | 9.130925942  | 0.379507849  | 0.38471106    | -0.005203211 | 0.999933887 | 3.717792632  | 4.862261055  | -1.144468424 | 0.000246643 |
| ENSG00000119335 | SET      | 6.321347653  | -0.066031836 | -0.04504822   | -0.020983616 | 0.999933887 | -0.356648609 | -0.826923858 | 0.470275249  | 0.000246643 |
| ENSG00000164620 | RELL2    | 2.201792452  | -0.095371238 | 0.099071222   | -0.19444246  | 0.999933887 | -0.768903198 | -1.521731526 | 0.752828328  | 0.000246643 |
| ENSG00000146828 | SLC12A9  | 6.695554705  | 0.03973703   | 0.074704003   | -0.034966973 | 0.999933887 | -0.120766451 | 0.6687442116 | 0.566675665  | 0.000246643 |
| ENSG00000138964 | PARVG    | 5.878723171  | 0.018340927  | 0.041109021   | -0.022768095 | 0.999933887 | -0.183683898 | -0.561071913 | 0.377388016  | 0.000246643 |
| ENSG00000145779 | TNFAIP8  | 5.4141109    | -0.032590625 | -0.008176978  | -0.024413647 | 0.999933887 | 1.0323358    | 1.664727325  | -0.632391525 | 0.000246901 |
| ENSG00000198740 | ZNF652   | 4.731758649  | 0.001417028  | -0.037529531  | 0.038946559  | 0.999933887 | -1.01688726  | -1.774359003 | 0.757471741  | 0.000250265 |
| ENSG00000115956 | PLEK     | 12.023675126 | 0.075079335  | 0.037220306   | 0.037859029  | 0.999933887 | 1.597892467  | 2.061758473  | -0.463866005 | 0.000252492 |
| ENSG00000196884 | HSH2D    | 6.88649446   | -0.024201097 | -0.001750812  | -0.040650285 | 0.999933887 | -0.437522359 | -0.900319364 | 0.462797006  | 0.000252492 |
| ENSG00000180198 | RCC1     | 2.912076758  | 0.040071405  | 0.173635178   | -0.133566114 | 0.999933887 | 0.577798494  | 1.307192435  | -0.729393941 | 0.000252492 |
| ENSG00000205189 | ZBTB10   | 3.938061568  | 0.024748339  | -0.01201382   | 0.036949721  | 0.999933887 | 1.089135579  | -0.896484247 | -0.896484668 | 0.000252492 |
| ENSG00000100647 | SUSD6    | 9.45735636   | 0.010436892  | 0.036888069   | -0.026451177 | 0.999933887 | 0.91140039   | 1.309033844  | -0.397633454 | 0.000252492 |
| ENSG00000136026 | CKAP4    | 7.607937659  | 0.040202874  | 0.014878684   | -0.010675811 | 0.999933887 | 1.270295966  | 1.965786258  | -0.695490292 | 0.000252492 |
| ENSG00000198911 | SREBF2   | 5.854413947  | 0.02169526   | -0.037149774  | 0.058845034  | 0.999933887 | 0.655988174  | 1.027213129  | -0.461224955 | 0.000257374 |
| ENSG00000169925 | BRD3     | 4.164455573  | 0.010431938  | 0.020369462   | -0.009937525 | 0.999933887 | -0.651337506 | -1.327132039 | 0.675794534  | 0.000257374 |
| ENSG00000164251 | FRL1     | 2.759032672  | -0.037616033 | 0.117203937   | -0.15481997  | 0.999933887 | -2.413552025 | -4.098744666 | 1.685192641  | 0.000257464 |
| ENSG00000159314 | ARHGAP27 | 7.668155691  | 0.047550806  | 0.088952478   | -0.041401672 | 0.999933887 | -0.595777113 | -1.089746916 | 0.493969803  | 0.000262944 |
| ENSG00000109654 | TRIM2    | 0.00120883   | -0.078697902 | 0.451130405   | -0.529828307 | 0.999933887 | 0.532934931  | 1.580905084  | -1.047970153 | 0.000263444 |
| ENSG00000130650 | UBAC1    | 3.695429311  | 0.032003507  | 0.043271158   | -0.011267651 | 0.999933887 | -0.216301756 | -0.784712087 | 0.568410332  | 0.000263767 |
| ENSG00000163110 | PDIM5    | 4.578542113  | 0.03823955   | 0.112531303   | -0.074291753 | 0.999933887 | 0.756530142  | 1.166392234  | -0.409862092 | 0.000272337 |
| ENSG00000102871 | TRADD    | 4.735924686  | 0.071324524  | 0.013234666   | 0.058089857  | 0.999933887 | -0.290282686 | -0.894060355 | 0.603777668  | 0.000272337 |
| ENSG00000110844 | PRPF40B  | -0.122007712 | -0.108806516 | 0.201079919   | -0.309886435 | 0.999933887 | 1.484003775  | 3.008363344  | -1.524359573 | 0.000290446 |
| ENSG00000165168 | CYBB     | 6.738982697  | -0.070108547 | -0.031186093  | -0.038922455 | 0.999933887 | 0.602982377  | 1.080449674  | -0.477467297 | 0.00029364  |
| ENSG00000112339 | HBS1L    | 4.4047058    | -0.061257071 | -0.064107555  | 0.002850484  | 0.999933887 | 0.574541671  | 1.0764278    | -0.50188613  | 0.00029364  |
| ENSG00000145569 | OTULINL  | 3.706960469  | -0.094460687 | 0.005058795   | -0.099519482 | 0.999933887 | 0.263474523  | 0.833424946  | -0.569950423 | 0.000295879 |
| ENSG00000157514 | TSC2D3   | 9.134040049  | -0.011916777 | -0.0504292187 | 0.09237541   | 0.999933887 | -0.77628887  | -1.228715918 | 0.454227048  | 0.000296261 |
| ENSG00000168246 | UBT2     | 4.18125607   | -0.075763025 | -0.228083976  | 0.152320952  | 0.999933887 | 1.503379877  | 2.098187992  | -0.594808019 | 0.000297103 |
| ENSG00000118046 | STK11    | 5.313184241  | 0.064348163  | 0.112129036   | -0.047842143 | 0.999933887 | -0.308829625 | -0.871492187 | 0.562626562  | 0.000310927 |
| ENSG00000178623 | GPR35    | 2.1171776    | -0.008914785 | -0.167741273  | 0.158826488  | 0.999933887 | 0.347240485  | 1.175361781  | -0.828121297 | 0.00031148  |
| ENSG00000124781 | UBR4     | 9.070915414  | 0.018468391  | -0.00327772   | 0.021746111  | 0.999933887 | 0.825319599  | -1.29329721  | -0.467072571 | 0.0003116   |
| ENSG00000226479 | TMEM185B | 6.284323945  | 0.045320704  | 0.028668138   | 0.016652566  | 0.999933887 | 1.311359819  | 1.763462082  | -0.452102263 | 0.000320855 |
| ENSG00000275183 | LENG9    | -0.003696788 | 0.407066343  | 0.36159922    | 0.045467124  | 0.999933887 | 0.923062846  | 2.367513803  | -1.444450957 | 0.000322891 |
| ENSG00000155707 | SAMSN1   | 7.361672507  | -0.035232391 | -0.093150808  | 0.057918417  | 0.999933887 | 1.375488844  | 2.23342943   | -0.567940566 | 0.000328361 |
| ENSG00000120913 | PDIM2    | 5.763933627  | 0.046706991  | 0.058095803   | -0.011388813 | 0.999933887 | -0.592193905 | -1.071276454 | 0.479082548  | 0.000328961 |
| ENSG00000177963 | RIC8A    | 6.06040413   | 0.049903089  | 0.051216703   | -0.001313614 | 0.999933887 | -0.27344288  | -0.607720428 | 0.400277548  | 0.000336036 |
| ENSG00000127311 | HELB     | 3.07806817   | -0.074746483 | -0.080984999  | 0.006238516  | 0.999933887 | 0.920101277  | 1.56364098   | -0.643539703 | 0.000340246 |
| ENSG00000108651 | UTP6     | 7.353831768  | -0.101602368 | -0.011021808  | -0.090580559 | 0.999933887 | -0.338873643 | -0.905998575 | 0.567124931  | 0.000342831 |
| ENSG00000006487 | ABCA7    | 7.140526705  | 0.053165691  | 0.070036064   | -0.016870373 | 0.999933887 | -0.21182583  | -0.662920736 | 0.451094905  | 0.000342831 |
| ENSG00000162894 | FCMR     | 5.566905152  | 0.018916731  | -0.040110136  | 0.059026867  | 0.999933887 | -0.379283865 | -0.98061236  | 0.601677372  | 0.000342831 |
| ENSG00000063854 | HAGH     | 3.3734938    | -0.015526495 | 0.121366734   | -0.136893229 | 0.999933887 | -0.235978833 | -0.58962096  | 0.579842153  | 0.000342831 |
| ENSG00000096968 | IAK2     | 4.829666692  | -0.065669532 | -0.074804238  | 0.009134706  | 0.999933887 | 0.140770073  | 0.872101852  | -0.731331779 | 0.00034346  |
| ENSG00000171206 | TRIM8    | 6.149454054  | 0.051304978  | 0.0399907705  | -0.01307272  | 0.999933887 | -0.375453055 | -0.832709426 | 0.457256371  | 0.000347638 |
| ENSG00000185010 | F8       | 2.899725049  | -0.049423081 | 0.015389995   | -0.064813076 | 0.999933887 | 1.183654891  | 1.908150233  | -0.724495342 | 0.000351263 |
| ENSG00000163545 | NUAK2    | 4.734755249  | -0.116094494 | -0.094025629  | -0.022068865 | 0.999933887 | -1.312199132 | -2.114633122 | 0.80243399   | 0.000363508 |
| ENSG00000247596 | TWF2     | 4.720285522  | -0.00883377  | 0.057236771   | -0.06607054  | 0.999933887 | -0.942269909 | -1.618419363 | 0.676149455  | 0.000363508 |
| ENSG00000163513 | TGFB2    | 6.746729634  | -0.037999402 | -0.006431059  | -0.031568343 | 0.999933887 | -0.320455523 | -0.787632824 | 0.467177301  | 0.000365152 |
| ENSG00000078804 | TP53INP2 | 7.470845163  | 0.101793777  | 0.016483737   | 0.08531004   | 0.999933887 | 1.015564483  | 1.625605549  | -0.610041065 | 0.000380181 |
| ENSG00000130723 | PRRC2B   | 6.421379404  | 0.039470274  | 0.024987753   | -0.01448252  | 0.999933887 | -0.153940435 | -0.480676553 | 0.326736118  | 0.000380941 |
| ENSG00000104518 | GSDMD    | 5.285067435  | 0.0620982    | 0.110068296   | -0.047971099 | 0.999933887 | -0.260582224 | -0.955633255 | 0.695051032  | 0.000380941 |
| ENSG00000124466 | LYPD3    | 0.952918453  | 0.142397702  | 0.154981695   | -0.012583993 | 0.999933887 | 1.587694586  | 2.685839716  | -1.09814513  | 0.000382875 |
| ENSG00000177666 | PNPLA2   | 6.112612197  | 0.023720823  | 0.030934588   | -0.007213765 | 0.999933887 | -0.357530952 | -0.767364966 | 0.409834014  | 0.000382875 |
| ENSG00000188559 | RALGAP2  | 6.850085421  | 0.017017115  | 0.034169465   | -0.01715235  | 0.999933887 | 0.382574072  | -0.771778747 | -0.389204675 | 0.000382875 |
| ENSG00000163393 | SLC22A15 | 3.934525979  | -0.019241434 | -0.028810718  | 0.009568752  | 0.999933887 | -0.92340487  | -1.49683136  | 0.57297649   | 0.000382875 |

|                 |            |              |              |               |              |             |              |              |              |             |
|-----------------|------------|--------------|--------------|---------------|--------------|-------------|--------------|--------------|--------------|-------------|
| ENSG00000136059 | VILL       | 3.904656882  | 0.040150453  | 0.06683193    | -0.026681477 | 0.999933887 | 2.086237209  | 2.910918988  | -0.824681779 | 0.000463771 |
| ENSG00000173688 | PHOSPHO1   | 7.338655545  | 0.008237831  | -0.00488136   | 0.013119191  | 0.999933887 | -1.088416248 | -1.700667664 | 0.612251414  | 0.000463771 |
| ENSG00000079459 | FODT1      | 4.697173366  | 0.035090254  | -0.024609319  | 0.059699572  | 0.999933887 | -0.236137191 | -0.651856952 | 0.415721461  | 0.000465902 |
| ENSG00000099860 | GADD45B    | 10.247449495 | 0.171428636  | 0.155579217   | 0.015849419  | 0.999933887 | 1.363104249  | 1.928093589  | -0.56498934  | 0.000474137 |
| ENSG00000173011 | TADA2B     | 5.235598144  | 0.03179577   | 0.003959699   | 0.027838781  | 0.999933887 | -0.624137195 | -1.105875984 | 0.481738788  | 0.000474137 |
| ENSG00000117298 | ECE1       | 9.089812894  | 0.014221799  | 0.005735823   | 0.008485975  | 0.999933887 | 1.742953283  | 2.317089955  | -0.574136672 | 0.000474137 |
| ENSG00000162433 | AK4        | 4.90796962   | -0.235465689 | -0.327402117  | 0.091936428  | 0.999933887 | 2.188280806  | 2.949740164  | -0.761459358 | 0.000478436 |
| ENSG00000182511 | FES        | 5.072112503  | 0.018858574  | 0.024945152   | -0.06095617  | 0.999933887 | -0.570558208 | -1.254934828 | 0.684376619  | 0.000478436 |
| ENSG00000118503 | TNFAIP3    | 10.401396196 | 0.131013351  | 0.131600428   | -0.000586877 | 0.999933887 | 2.325472362  | 2.980843456  | -0.655371093 | 0.000481081 |
| ENSG00000120217 | CD274      | 4.631863574  | 0.049397087  | 0.064695207   | -0.015298121 | 0.999933887 | 1.997103329  | 2.703442319  | -0.70634289  | 0.000493276 |
| ENSG00000099910 | KLHL22     | 2.8548089    | -0.057505516 | 0.005317983   | -0.062823499 | 0.999933887 | -0.243420278 | -0.708316686 | 0.464896409  | 0.00049429  |
| ENSG00000232442 | MHENC1     | 2.703767444  | 0.01094313   | -0.051906132  | 0.062849262  | 0.999933887 | -0.1354225   | -0.729809852 | 0.594387352  | 0.000498713 |
| ENSG00000166501 | PRKCB      | 7.655081114  | -0.068956297 | -0.041310712  | -0.027645584 | 0.999933887 | -0.423642147 | -0.757976277 | 0.33433413   | 0.000498883 |
| ENSG00000130313 | PGLS       | 4.008544025  | 0.074734564  | -0.010460198  | 0.085194763  | 0.999933887 | -0.532247002 | -1.150565306 | 0.618318307  | 0.000498883 |
| ENSG00000198315 | ZKSCAN8    | 4.353249745  | -0.012552264 | -0.106695115  | 0.094142851  | 0.999933887 | 0.168265699  | 0.822822848  | -0.654557149 | 0.00049918  |
| ENSG00000110080 | ST3GAL4    | 4.883979989  | 0.120873664  | 0.139814247   | -0.018940583 | 0.999933887 | 0.923438431  | 1.416935402  | -0.493496971 | 0.000509158 |
| ENSG00000073849 | ST6GAL1    | 5.137139756  | 0.008299139  | -0.032144427  | 0.040443326  | 0.999933887 | -0.315752399 | -0.703174502 | 0.387421693  | 0.000509158 |
| ENSG00000115649 | CNPPD1     | 5.224900151  | -0.036621252 | 0.000187896   | -0.036809148 | 0.999933887 | -0.706268412 | -1.173552934 | 0.467284523  | 0.000512618 |
| ENSG00000055208 | TAB2       | 8.063397928  | -0.023003317 | -0.014713522  | 0.051132205  | 0.999933887 | 0.699293902  | 1.101446521  | -0.402152619 | 0.00051355  |
| ENSG00000160191 | PDE9A      | 0.723217692  | 0.049836408  | 0.064928413   | -0.015092004 | 0.999933887 | 0.076881875  | -1.041153499 | 0.000521709  | 0.000521709 |
| ENSG00000095015 | MAP3K1     | 6.831575066  | -0.030440972 | -0.049034587  | 0.018593878  | 0.999933887 | -0.168520606 | 0.297427913  | -0.46594852  | 0.000525996 |
| ENSG00000116729 | WLS        | 5.197853349  | 0.028390501  | -0.010487496  | 0.038877997  | 0.999933887 | -0.787430261 | -1.367914068 | 0.679980207  | 0.000525996 |
| ENSG00000102554 | KLF5       | 4.238786433  | 0.020212749  | 0.013776478   | 0.006436271  | 0.999933887 | 0.814897465  | 1.343313048  | -0.528415583 | 0.000525996 |
| ENSG00000167778 | SPRYD3     | 4.086048572  | -0.004189092 | 0.04094156    | -0.045130652 | 0.999933887 | -0.392752689 | -0.927242874 | 0.534490185  | 0.000525996 |
| ENSG00000005844 | ITGAL      | 7.968619303  | 0.026285021  | 0.022364862   | 0.003920159  | 0.999933887 | -0.054442639 | -0.349665831 | 0.295223192  | 0.000528974 |
| ENSG00000142405 | NLRP12     | 4.998051598  | -0.076259096 | -0.083419673  | 0.007160577  | 0.999933887 | -1.253327554 | -1.91626857  | 0.662941016  | 0.000531247 |
| ENSG00000277406 | SEC22B4P   | 2.696943022  | -0.117219606 | 0.132610968   | -0.249830574 | 0.999933887 | 1.625679534  | 2.193104262  | -0.567425088 | 0.000531247 |
| ENSG00000125656 | CLPP       | 3.563830608  | 0.053177859  | -0.09749213   | 0.150669989  | 0.999933887 | -0.166994519 | -0.830337775 | 0.663343257  | 0.00054406  |
| ENSG00000147394 | ZNF185     | 4.281441854  | 0.031550595  | -0.018498934  | 0.050040953  | 0.999933887 | -0.82086849  | -1.364827296 | 0.539544487  | 0.000553891 |
| ENSG00000125910 | S1PR4      | 6.306404756  | 0.016717606  | -0.043721018  | 0.060438625  | 0.999933887 | -0.697309509 | -1.412671686 | 0.715362178  | 0.000558687 |
| ENSG00000099817 | POLR2E     | 5.730153765  | 0.02262226   | 0.020026596   | 0.002596004  | 0.999933887 | -0.28996169  | -0.677846517 | 0.387884827  | 0.000558687 |
| ENSG00000111087 | GLI1       | 2.624007187  | 0.049798876  | -0.044227185  | 0.094026061  | 0.999933887 | -0.553569614 | -1.140575758 | 0.587006145  | 0.000564584 |
| ENSG00000119403 | PHF19      | 3.831820289  | -0.018326151 | 0.030036577   | -0.048362727 | 0.999933887 | 0.603947943  | 1.258501589  | -0.654553646 | 0.000564584 |
| ENSG00000163931 | TKT        | 8.272076849  | 0.010518431  | -0.00207398   | 0.012725829  | 0.999933887 | -0.847302549 | -0.510055556 | 0.00056899   | 0.00056899  |
| ENSG00000286173 | STRADA     | 3.326938532  | -0.010214006 | -0.134750543  | 0.124536537  | 0.999933887 | -0.518326979 | -1.100155504 | 0.581828525  | 0.00056899  |
| ENSG00000138614 | INTS14     | 2.406827094  | -0.006507736 | 0.02537633    | -0.031884066 | 0.999933887 | 0.685669629  | 1.341883935  | -0.656214306 | 0.000569404 |
| ENSG00000286162 | AL162253.2 | 1.64577002   | 0.1322837    | 0.087289941   | 0.045938829  | 0.999933887 | 1.57063582   | 2.467081202  | -0.896425382 | 0.000581413 |
| ENSG00000151465 | CDC123     | 4.252510867  | -0.053746532 | -0.030487713  | -0.023525819 | 0.999933887 | -0.306430671 | -0.771693294 | 0.465262623  | 0.000581413 |
| ENSG00000068028 | RASSF1     | 4.891462629  | -0.037162803 | 0.02853351    | -0.065696313 | 0.999933887 | -0.13494986  | -0.562207847 | 0.427257987  | 0.000581947 |
| ENSG00000110324 | IL10RA     | 7.422934672  | 0.072740418  | 0.102350273   | -0.029609855 | 0.999933887 | 1.131844978  | 1.822963674  | -0.691118696 | 0.000582956 |
| ENSG00000116574 | RHOJ       | 2.726233695  | -0.102730842 | -0.214213816  | 0.111482974  | 0.999933887 | 0.78114959   | 1.839404265  | -1.058254675 | 0.000582956 |
| ENSG00000169756 | LIMS1      | 6.915249345  | -0.058639423 | 0.005851231   | -0.064490654 | 0.999933887 | 1.638769898  | 2.220986789  | -0.582216891 | 0.000582956 |
| ENSG00000100596 | SPTLC2     | 4.29971387   | -0.041050623 | -0.036920042  | -0.004130581 | 0.999933887 | -0.599764306 | -1.122627777 | 0.522863471  | 0.000582956 |
| ENSG00000154957 | ZNF18      | 3.24696529   | -0.051323353 | 0.011618395   | -0.062941748 | 0.999933887 | -0.523975766 | -1.111147023 | 0.587171258  | 0.00059238  |
| ENSG00000173276 | ZBTB21     | 5.822255805  | 0.036906955  | -0.091802073  | 0.128790028  | 0.999933887 | 0.541520042  | 1.044856748  | -0.503336707 | 0.00059238  |
| ENSG00000162924 | REL        | 6.703556129  | -0.03931007  | -0.006483538  | -0.032826532 | 0.999933887 | 1.469172903  | 2.266581537  | -0.797408634 | 0.00059238  |
| ENSG00000167077 | MEI1       | 3.664762043  | 0.065662383  | 0.03245316    | 0.033209223  | 0.999933887 | 0.640884165  | 1.308960443  | -0.668079877 | 0.000592893 |
| ENSG00000150054 | MPP7       | 4.128406659  | -0.033622275 | 0.015468826   | -0.048832101 | 0.999933887 | 0.002872586  | -0.494784436 | -0.494782249 | 0.000598825 |
| ENSG00000198920 | KIAA0753   | 2.833926859  | -0.071690608 | -0.122054894  | 0.050364285  | 0.999933887 | -0.641371467 | -1.201962916 | 0.56059145   | 0.000599905 |
| ENSG00000143207 | COP1       | 6.046359176  | -0.044050497 | 0.022748502   | -0.066798999 | 0.999933887 | -0.463585687 | -0.900609272 | 0.437024033  | 0.000599905 |
| ENSG00000202304 | ZDHHC6     | 5.006196152  | -0.005896617 | 0.003052504   | -0.00894912  | 0.999933887 | 0.653613196  | 1.038706046  | -0.385146849 | 0.000599905 |
| ENSG00000187994 | RINL       | 3.34543152   | 0.093907251  | 0.16280181    | -0.068894559 | 0.999933887 | -0.102796442 | -0.660473923 | 0.557677481  | 0.000600908 |
| ENSG00000163156 | SCNM1      | 4.239916091  | -0.04965325  | -0.0309081249 | -0.010572001 | 0.999933887 | -0.634315962 | -0.418851739 | 0.000600908  | 0.000600908 |
| ENSG00000168763 | CNNM3      | 4.382311719  | 0.050485755  | 0.029042453   | 0.021443301  | 0.999933887 | -0.337315054 | -0.735048783 | 0.397733729  | 0.000602361 |
| ENSG00000197070 | ARRDC1     | 4.802213759  | 0.045818734  | 0.096673527   | -0.050854792 | 0.999933887 | -0.12106694  | -0.608540687 | 0.487473747  | 0.000602361 |
| ENSG00000172830 | SSH3       | 4.489237102  | 0.025402329  | 0.071246487   | -0.05844158  | 0.999933887 | -0.97209232  | -1.613043141 | 0.635833909  | 0.000602361 |
| ENSG00000134070 | IRAK2      | 8.465396421  | 0.007435236  | -0.058204457  | 0.065639693  | 0.999933887 | 2.076817628  | 2.654440098  | -0.577583369 | 0.000602361 |
| ENSG00000167261 | DPEP2      | 6.704467166  | -0.051407234 | -0.039027158  | -0.012380076 | 0.999933887 | -1.456076039 | -2.074524375 | 0.618448696  | 0.000607851 |
| ENSG00000112419 | PHACTR2    | 3.486976267  | -0.028876467 | -0.085627665  | 0.056751197  | 0.999933887 | 0.029435882  | 0.904048215  | -0.874612333 | 0.000607851 |
| ENSG00000186074 | CD300LF    | 5.549016988  | -0.015508064 | 0.051273333   | -0.066781397 | 0.999933887 | -0.803353928 | -1.3474114   | 0.544054772  | 0.000607851 |
| ENSG00000173120 | KDM2A      | 7.885612119  | 0.011230504  | 0.031453871   | -0.020223368 | 0.999933887 | -0.255324258 | -0.587373632 | 0.332052105  | 0.000625152 |
| ENSG00000106514 | RAB3D      | 4.855767503  | -0.086710129 | -0.093705679  | 0.06995551   | 0.999933887 | -1.256174382 | -2.184413015 | 0.928238633  | 0.000636876 |
| ENSG00000138821 | SLC39A8    | 4.32104294   | -0.034530771 | -0.005733192  | -0.028797579 | 0.999933887 | 1.769492516  | 2.698565707  | -0.92907319  | 0.000638366 |
| ENSG00000205339 | IPO7       | 4.123677741  | -0.065744837 | -0.12758003   | 0.106835193  | 0.999933887 | 0.322654136  | 0.908415517  | -0.585761381 | 0.000639185 |
| ENSG00000173281 | PPP1R3B    | 5.408562413  | -0.096006164 | -0.062055398  | -0.033920766 | 0.999933887 | -0.891823591 | -1.415688102 | 0.52384451   | 0.000651613 |
| ENSG00000107711 | CCSER2     | 5.053372282  | -0.039765717 | -0.062880182  | 0.023114465  | 0.999933887 | 0.083338967  | 0.673996645  | -0.590657678 | 0.000651613 |
| ENSG00000075131 | TIPIN      | -1.022044372 | -0.19702859  | -0.060792726  | -0.136235864 | 0.999933887 | 1.07889118   | 2.704298128  | -1.625406948 | 0.000665217 |
| ENSG00000144566 | RAB5A      | 6.8954384    | 0.026013049  | 0.060220051   | -0.034207002 | 0.999933887 | 0.419433151  | 0.726072029  | -0.306628878 | 0.000668512 |
| ENSG00000104660 | LEPROTL1   | 5.133251522  | 0.023259172  | -0.038540737  | 0.061799909  | 0.999933887 | -0.248828957 | -0.706030205 | 0.457201247  | 0.000668512 |
| ENSG00000187147 | RNF220     | 4.278335805  | -0.048115165 | -0.030773336  | -0.017341829 | 0.999933887 | -0.307283804 | -0.664629197 | 0.364535393  | 0.000670753 |
| ENSG00000176393 | RNPEP      | 3.849141579  | 0.040557681  | 0.024528101   | -0.00198042  | 0.999933887 | -0.567800472 | -1.205495463 | 0.63         |             |

|                  |            |              |              |              |              |             |              |              |              |             |
|------------------|------------|--------------|--------------|--------------|--------------|-------------|--------------|--------------|--------------|-------------|
| ENSG00000013398  | LCA7       | 1.799986222  | 0.080204867  | 0.068330226  | 0.011874641  | 0.999933887 | -0.654952177 | -1.504975605 | 0.850023428  | 0.000831212 |
| ENSG000000160326 | SLC2A6     | 2.282232105  | 0.161355104  | 0.009933379  | 0.151421726  | 0.999933887 | 3.271499775  | 4.489742289  | -1.218242514 | 0.000834147 |
| ENSG00000015602  | IL1RL1     | 2.905921682  | -0.068124385 | -0.009300448 | -0.058823937 | 0.999933887 | -0.018412791 | 0.525336114  | -0.543748904 | 0.000851884 |
| ENSG000000151702 | FLI1       | 5.65072938   | 0.04251064   | 0.048062083  | -0.005551444 | 0.999933887 | -0.266649821 | -0.702765479 | 0.436115658  | 0.000851884 |
| ENSG000000213625 | LEPROT     | 6.756932198  | -0.06183044  | -0.023409061 | -0.038421379 | 0.999933887 | -0.294947933 | 0.156533862  | -0.451481795 | 0.000855648 |
| ENSG000000109972 | CORO1A     | 9.099271042  | 0.029189919  | 0.023617169  | 0.00557275   | 0.999933887 | -0.628412864 | -1.155227762 | 0.526814898  | 0.000855648 |
| ENSG000000808015 | PSEN1      | 7.967791916  | -0.089330885 | -0.046127572 | -0.043203314 | 0.999933887 | 1.167122172  | 1.552611796  | -0.385489624 | 0.000859511 |
| ENSG000000095319 | NUP188     | 4.088413094  | -0.034942913 | -0.010234267 | -0.024708637 | 0.999933887 | 0.578225307  | 1.132824996  | -0.554599679 | 0.000859531 |
| ENSG000000151694 | ADAM17     | 6.846157601  | -0.081503171 | -0.034276138 | -0.038227033 | 0.999933887 | 0.945624397  | 1.271658452  | -0.326034055 | 0.000861223 |
| ENSG000000131242 | RAB11FIP4  | 7.029733623  | -0.096982499 | -0.052327907 | -0.044654592 | 0.999933887 | -1.253543634 | -1.794640701 | -0.541097067 | 0.000861223 |
| ENSG000000108262 | GIT1       | 4.285374505  | 0.03413015   | 0.020001222  | 0.014128928  | 0.999933887 | -0.165869188 | -0.568420673 | 0.402551486  | 0.000861223 |
| ENSG000000215861 | AC245297.1 | 1.500980679  | -0.129264089 | 0.413986395  | -0.543250484 | 0.999933887 | 1.258602537  | 1.912291656  | -0.653689119 | 0.000861223 |
| ENSG000000175471 | MCTP1      | 5.880030353  | -0.014736746 | -0.023190288 | 0.008453543  | 0.999933887 | 1.225932422  | 1.82747085   | -0.601538428 | 0.000861223 |
| ENSG000000104973 | MED25      | 6.499680055  | -0.004589642 | 0.023811591  | -0.028401233 | 0.999933887 | -0.907996878 | -1.381358268 | 0.473361751  | 0.000861223 |
| ENSG000000196498 | NCOR2      | 7.457743169  | 0.090605118  | 0.061155803  | 0.029449315  | 0.999933887 | 1.383891049  | 1.951659596  | -0.567768907 | 0.000865401 |
| ENSG000000198879 | SFMBT2     | 6.935850546  | -0.024493193 | 0.006517866  | -0.031011058 | 0.999933887 | 1.280894524  | 1.802098047  | -0.521203523 | 0.00086938  |
| ENSG00000026508  | CD44       | 10.012102911 | -0.008263367 | 0.011141126  | -0.019404493 | 0.999933887 | 1.173283413  | 1.669825102  | -0.496541689 | 0.00086938  |
| ENSG000000105967 | TREC       | 3.262959541  | 0.134275547  | -0.016040502 | 1.502800049  | 0.999933887 | 2.592349255  | 3.634482164  | -1.042132909 | 0.000869393 |
| ENSG000000170448 | NFXL1      | 4.004613668  | -0.117824545 | -0.023345124 | -0.094479423 | 0.999933887 | -0.429349902 | -1.080396134 | 0.651046232  | 0.000873123 |
| ENSG000000172332 | MUS81      | 3.997931     | 0.082357227  | 0.14626158   | -0.063904353 | 0.999933887 | -0.144765866 | -0.543535734 | 0.396587868  | 0.000873123 |
| ENSG000000137757 | CASP5      | 3.749760443  | -0.08609178  | -0.182235994 | 0.096144214  | 0.999933887 | 1.512608821  | 2.273230805  | -0.760621985 | 0.000873123 |
| ENSG000000100811 | YY1        | 6.093847832  | -0.005007753 | 0.044118022  | -0.049125775 | 0.999933887 | -0.478857033 | -0.840571919 | 0.361714886  | 0.000873123 |
| ENSG000000160766 | GBAP1      | 0.903382235  | 0.107460104  | -0.254622086 | 0.36208219   | 0.999933887 | -0.698924426 | -1.772565537 | 1.073641111  | 0.000886957 |
| ENSG000000156873 | PHKG2      | 4.013398329  | 0.032914119  | 0.020869598  | 0.012048161  | 0.999933887 | -0.26334179  | -0.675186363 | 0.411844573  | 0.000886957 |
| ENSG000000189319 | FAM53B     | 5.863330618  | -0.035389795 | 0.00251613   | -0.037905926 | 0.999933887 | -0.545307394 | -1.078350952 | 0.533043558  | 0.000886957 |
| ENSG000000182287 | AP1S2      | 4.709134929  | 0.012312835  | -0.171067645 | 1.8338048    | 0.999933887 | 1.070466726  | 1.564622083  | -0.494155356 | 0.000886957 |
| ENSG000000261804 | AC007342.4 | 1.84888396   | -0.016519493 | -0.075906134 | 0.059386641  | 0.999933887 | -0.846757813 | -1.973536691 | 1.126778878  | 0.000886957 |
| ENSG000000189621 | APLF       | 0.236054238  | -0.175551456 | 0.099786284  | -0.275338192 | 0.999933887 | 1.203355123  | 2.106369159  | -0.903280796 | 0.000892752 |
| ENSG000000102882 | MAPK3      | 6.17902598   | 0.029810834  | 0.017738236  | 0.012072551  | 0.999933887 | -0.780748739 | -1.254757156 | 0.474008417  | 0.000903596 |
| ENSG000000113348 | ARHGDIB    | 9.144516412  | 0.014736594  | -0.05683368  | 0.071570274  | 0.999933887 | -0.206022716 | -0.658814279 | 0.452791563  | 0.000904363 |
| ENSG000000151012 | SLC7A11    | 6.158364357  | -0.064944797 | -0.057411143 | -0.007533654 | 0.999933887 | -0.073271427 | 0.432089152  | -0.50536058  | 0.000909441 |
| ENSG000000138646 | HERC5      | 5.026477572  | -0.083749161 | -0.058074985 | -0.025044179 | 0.999933887 | -0.721078821 | -1.275293766 | 0.554214945  | 0.00091066  |
| ENSG000000084733 | RAB10      | 7.088847968  | 0.047778287  | 0.063341354  | -0.015563067 | 0.999933887 | 0.491744298  | 0.876478915  | -0.384734617 | 0.000915528 |
| ENSG000000100106 | TRIOBP     | 6.021055611  | 0.054558684  | 0.063812048  | -0.009253365 | 0.999933887 | -0.618894151 | -1.088074406 | 0.469180255  | 0.000915649 |
| ENSG000000104960 | PTOV1      | 5.037098963  | 0.049903056  | 0.10887393   | -0.058970874 | 0.999933887 | -0.278479871 | -0.770054262 | 0.491574391  | 0.000926398 |
| ENSG000000111732 | AC10A      | -1.068427222 | 0.311359986  | -0.549775674 | 0.86113566   | 0.999933887 | 1.557603969  | 2.740640977  | -1.183037008 | 0.000949765 |
| ENSG000000182973 | CNOT10     | 3.548674091  | -0.0387956   | -0.026976516 | -0.011819084 | 0.999933887 | -0.29947756  | -0.80101289  | 0.501535331  | 0.000949765 |
| ENSG000000146826 | MAP11      | 4.819692171  | 0.107134509  | 0.116920304  | -0.009788516 | 0.999933887 | -0.386154864 | -0.863227827 | 0.477072963  | 0.000952845 |
| ENSG000000274265 | AC245297.3 | 2.355286057  | 0.062817848  | 0.074202021  | -0.011384183 | 0.999933887 | 0.783963714  | 1.313909565  | -0.529945851 | 0.000960953 |
| ENSG000000056558 | TRAF1      | 6.65872219   | 0.043222643  | 0.027058333  | 0.01616431   | 0.999933887 | 2.604150443  | 3.449710752  | -0.845560309 | 0.000960953 |
| ENSG000000154237 | LRK1       | 4.15203469   | -0.025959454 | 0.027358265  | -0.053317719 | 0.999933887 | -0.370903319 | -0.93291908  | 0.562015761  | 0.000967348 |
| ENSG000000108861 | DUSP3      | 5.991821097  | -0.058160242 | -0.087420092 | 0.029259849  | 0.999933887 | 0.935414221  | 1.362509467  | -0.427095247 | 0.000969831 |
| ENSG000000038210 | PHK2B      | 2.971242188  | -0.17442804  | 0.014339162  | -0.188767203 | 0.999933887 | 0.884343533  | 1.736433205  | -0.852089673 | 0.00097215  |
| ENSG000000126216 | TUBGCP3    | 4.009229963  | -0.013935024 | 0.050174144  | -0.064111468 | 0.999933887 | -0.723243092 | -0.284708781 | 0.43853431   | 0.00097215  |
| ENSG000000139651 | ZNF740     | 3.556275446  | -0.03534286  | -0.001449762 | -0.033893097 | 0.999933887 | -0.167301476 | -0.551628541 | 0.384327066  | 0.00097297  |
| ENSG000000123728 | RAP2C      | 6.740101708  | 0.019185788  | 0.01060213   | 0.008581576  | 0.999933887 | 0.757529754  | 1.114401871  | -0.356872117 | 0.000987054 |
| ENSG000000122958 | VPS26A     | 6.245553559  | -0.065660389 | -0.152938486 | 0.087278097  | 0.999933887 | -0.075710106 | 0.29289067   | -0.368600776 | 0.001006552 |
| ENSG000000160310 | PRMT2      | 6.084208728  | 0.022518318  | -0.038198299 | 0.060716617  | 0.999933887 | 0.804957681  | 1.31166198   | -0.506698517 | 0.001006552 |
| ENSG000000179743 | FLJ37453   | 2.086985545  | -0.07488705  | 0.045696202  | -0.120583252 | 0.999933887 | -0.311897845 | -0.915954757 | 0.604056912  | 0.001045357 |
| ENSG000000085978 | ATG16L1    | 4.460021644  | -0.05552266  | -0.017953022 | -0.03759637  | 0.999933887 | -0.107672693 | -0.432284006 | 0.324611313  | 0.001057199 |
| ENSG000000131979 | GCH1       | 5.98911626   | -0.050802097 | 0.024903362  | -0.075392419 | 0.999933887 | 2.958338265  | 3.869760131  | -0.911421867 | 0.001063286 |
| ENSG000000272501 | AL662844.4 | 4.527859133  | -0.087503388 | -0.089438793 | 0.01935404   | 0.999933887 | -0.883104971 | -1.433593599 | 0.550488628  | 0.001072907 |
| ENSG000000116478 | HDAC1      | 5.126536128  | 0.025448329  | -0.042998062 | 0.068446392  | 0.999933887 | -0.126543867 | -0.50503495  | 0.378491083  | 0.001089166 |
| ENSG000000137161 | CNPFY3     | 7.11298908   | 0.001965625  | -0.010919968 | 0.012885593  | 0.999933887 | -0.360322446 | -0.729515254 | 0.369192808  | 0.001089166 |
| ENSG000000120690 | ELF1       | 9.074939424  | -0.061614246 | -0.144267855 | 0.082653609  | 0.999933887 | -0.053605827 | 0.293197105  | -0.346802932 | 0.001092888 |
| ENSG000000108622 | ICAM2      | 3.194515294  | 0.071919981  | 0.012510454  | 0.059409527  | 0.999933887 | 0.368944739  | -0.810031012 | -0.441086273 | 0.00110226  |
| ENSG000000166145 | SPINT1     | 2.364680459  | 0.021940643  | 0.063219973  | -0.041279509 | 0.999933887 | -0.958334028 | -1.938115495 | 0.979781468  | 0.00110226  |
| ENSG000000049239 | H6PD       | 4.58803922   | 0.010937577  | 0.051032031  | 0.050140694  | 0.999933887 | -0.348712024 | 0.390224288  | -0.300224288 | 0.001113003 |
| ENSG000000185338 | SOC51      | 3.75060899   | 0.164057176  | 0.11755812   | 0.046499056  | 0.999933887 | 1.072436563  | 1.656482596  | -0.584046033 | 0.001126632 |
| ENSG000000146070 | PLA2G7     | 1.070755343  | 0.17249263   | 0.184580699  | -0.012088069 | 0.999933887 | 0.488889488  | 1.141170228  | -0.65228074  | 0.001132075 |
| ENSG000000171163 | ZNF692     | 3.702823715  | 0.028704578  | 0.056240757  | -0.027536179 | 0.999933887 | -0.356602666 | -0.827265932 | 0.470663267  | 0.001132075 |
| ENSG000000103415 | HMOX2      | 4.437550536  | -0.036498042 | 0.001993042  | -0.038491084 | 0.999933887 | -0.43704441  | -1.004070863 | 0.567026722  | 0.001132167 |
| ENSG000000105122 | RASAL3     | 6.389077992  | 0.021825805  | 0.043515578  | -0.021329902 | 0.999933887 | -0.23921628  | -0.574251013 | 0.335034762  | 0.001132167 |
| ENSG000000160214 | RRP1       | 4.524148065  | 0.063491947  | 0.082693821  | -0.019201874 | 0.999933887 | 0.911728836  | 1.332408532  | -0.420679696 | 0.001136208 |
| ENSG000000141506 | PIK3R5     | 9.557875607  | -0.007780963 | -0.011920783 | -0.00586018  | 0.999933887 | 0.527022804  | -0.278487653 | -0.257853726 | 0.00114191  |
| ENSG000000167004 | NKX3-1     | 1.007559357  | 0.019750232  | -0.026367036 | 0.046117268  | 0.999933887 | -1.049529014 | -2.125213217 | 1.075684203  | 0.00114191  |
| ENSG00000012804  | ATP2C1     | 4.291924181  | -0.052775512 | -0.092500352 | 0.03972484   | 0.999933887 | 0.274393355  | 0.783468934  | -0.509075578 | 0.001143123 |
| ENSG000000040275 | SPDL1      | 1.757446492  | -0.151275343 | -0.371452951 | 0.220177608  | 0.999933887 | 0.234800241  | 0.839891104  | -0.605090863 | 0.001146891 |
| ENSG000000162222 | TTC9C      | 2.044275448  | -0.020349182 | -0.071334337 | 0.050993175  | 0.999933887 | -0.312251873 | -0.937431068 | 0.625179195  | 0.001148212 |
| ENSG000000180539 | C9orf139   | 1.824751912  | 0.008731282  | 0.130396265  | -0.121638083 | 0.999933887 | -0.376075397 | -1.331684415 | 0.955608747  | 0.001159151 |
| ENSG000000147813 | NAPRT      | 4.931008226  | 0.           |              |              |             |              |              |              |             |

|                  |            |              |              |              |              |             |              |               |              |             |
|------------------|------------|--------------|--------------|--------------|--------------|-------------|--------------|---------------|--------------|-------------|
| ENSG00000140932  | CMTM2      | 6.650287658  | -0.038273753 | -0.064978863 | 0.02670511   | 0.999933887 | -0.43487889  | -1.038086622  | 0.603207733  | 0.001370793 |
| ENSG000000158201 | ABHD3      | 5.36684154   | -0.029278807 | -0.032717582 | 0.003438775  | 0.999933887 | -0.444824932 | -0.859422976  | 0.414598044  | 0.001373997 |
| ENSG000000127328 | RAB3IP     | 2.200302749  | -0.049835669 | -0.143462422 | 0.093626753  | 0.999933887 | 0.451126445  | 1.097024438   | -0.645897993 | 0.001390956 |
| ENSG000000067955 | CBFB       | 4.357709591  | -0.037838468 | 0.003283496  | -0.041121963 | 0.999933887 | -0.490513422 | -0.865207711  | 0.374694289  | 0.001397599 |
| ENSG000000146476 | ARMT1      | 4.057822996  | -0.06616615  | -0.065403908 | -0.000762242 | 0.999933887 | 0.115188619  | 0.489564042   | -0.374375422 | 0.001398212 |
| ENSG000000166128 | RAB8B      | 8.422073549  | -0.082839163 | -0.138378184 | 0.055539021  | 0.999933887 | 0.468493465  | 0.953413518   | -0.484920052 | 0.001410206 |
| ENSG000000125779 | PANK2      | 4.416017883  | 0.021439671  | 0.046380965  | -0.024941294 | 0.999933887 | -0.404803605 | -0.808672361  | 0.403868756  | 0.001417129 |
| ENSG000000015285 | WAS        | 7.942319352  | 3.4829e-05   | -0.004711243 | 0.004746072  | 0.999933887 | -0.466864243 | -0.813630206  | 0.346765783  | 0.001419612 |
| ENSG000000104320 | NBN        | 8.290914724  | -0.108007119 | -0.175803556 | 0.067796437  | 0.999933887 | 1.745953824  | 2.511749664   | -0.765795841 | 0.001421977 |
| ENSG000000155096 | AZIN1      | 7.999130461  | -0.092308378 | -0.049102777 | -0.043202101 | 0.999933887 | 1.601183406  | 2.073971957   | -0.47278955  | 0.001422688 |
| ENSG000000104866 | PPP1R37    | 3.434734634  | 0.075795769  | 0.058308487  | 0.017487282  | 0.999933887 | -0.304170148 | -0.788976893  | 0.484806745  | 0.001427275 |
| ENSG000000197860 | SGTB       | 7.708349632  | -0.043899454 | -0.114931342 | 0.071031888  | 0.999933887 | 0.372939021  | 0.818817598   | -0.445878577 | 0.001427275 |
| ENSG000000257027 | AC010186.3 | 2.200414169  | -0.034075521 | 0.087204356  | -0.121279877 | 0.999933887 | 0.839351153  | 1.729461296   | -0.890110143 | 0.001427275 |
| ENSG000000148290 | SURF1      | 3.860321104  | 0.003662941  | -0.05473195  | 0.05839489   | 0.999933887 | -0.177253533 | -0.560297813  | 0.383044281  | 0.001427275 |
| ENSG000000128564 | VGF        | 0.157970524  | -0.145556878 | 0.299168243  | -0.444725121 | 0.999933887 | -0.575043985 | -1.638403287  | 1.063359303  | 0.001445882 |
| ENSG000000103495 | MAZ        | 4.029472511  | 0.032788355  | 0.104761989  | -0.071973634 | 0.999933887 | -0.413368229 | -0.956025557  | 0.542657328  | 0.001445882 |
| ENSG000000113916 | BCL6       | 9.921030222  | 0.009469631  | -0.011243693 | 0.020713324  | 0.999933887 | 0.510006039  | 0.751846485   | -0.241840446 | 0.001445882 |
| ENSG000000035664 | DAPK2      | 4.990465506  | -0.012765326 | 0.050601394  | -0.07826721  | 0.999933887 | -0.289636685 | -0.719050706  | 0.429414021  | 0.001445882 |
| ENSG000000043462 | LCP2       | 10.941819185 | -0.006795142 | -0.001225155 | -0.005569987 | 0.999933887 | 0.921980152  | 1.258023786   | -0.336043634 | 0.001445882 |
| ENSG000000170638 | TRABD      | 6.035628248  | 0.051131951  | 0.0041558172 | 0.009573778  | 0.999933887 | -0.082725185 | -0.460201401  | 0.377476216  | 0.001447743 |
| ENSG000000134802 | SLC4A3A    | 6.398534944  | 0.036693287  | -0.006944367 | 0.043637654  | 0.999933887 | 1.589710385  | 2.031190276   | -0.441479891 | 0.001447743 |
| ENSG000000187266 | EPOR       | 2.460028448  | 0.019134689  | 0.073736376  | -0.054628588 | 0.999933887 | -0.657894064 | -1.255716873  | 0.597822809  | 0.001459735 |
| ENSG000000112096 | SOD2       | 12.211699964 | -0.040862904 | 0.022933325  | -0.063796229 | 0.999933887 | 2.031100578  | 2.529030648   | -0.49793007  | 0.001465509 |
| ENSG000000128594 | LRRC4      | 5.863742671  | 0.020438484  | 0.039057027  | -0.018618544 | 0.999933887 | -1.568306981 | -2.163316753  | 0.595009773  | 0.001470514 |
| ENSG000000079805 | DNM2       | 7.996709507  | 0.002575392  | 0.032184455  | -0.029609062 | 0.999933887 | -0.286296091 | -0.562380583  | 0.276084492  | 0.001524737 |
| ENSG000000148737 | TCF7L2     | 4.718575352  | -0.038280177 | 0.105987416  | -0.144267593 | 0.999933887 | 0.571546136  | 0.941747091   | -0.370200954 | 0.001530305 |
| ENSG000000205356 | TECP1R1    | 5.493905349  | 0.037977813  | 0.053550041  | -0.015572228 | 0.999933887 | -0.289714419 | -0.681834293  | 0.392119854  | 0.00154636  |
| ENSG000000164603 | BM2        | 3.933299743  | -0.00577163  | -0.106498448 | 0.100727018  | 0.999933887 | 1.248532369  | 1.79381925    | -0.54528688  | 0.00154636  |
| ENSG000000165030 | NFIL3      | 7.816060722  | 0.055898231  | -0.03946434  | 0.095362571  | 0.999933887 | 0.794924028  | 1.233732985   | -0.438808957 | 0.001546463 |
| ENSG000000069956 | MAPK6      | 7.626388574  | -0.062497878 | -0.127723171 | 0.065225294  | 0.999933887 | 1.132372757  | 1.65203032    | -0.519657563 | 0.001546463 |
| ENSG000000119638 | NEK9       | 4.793638018  | -0.03039132  | -0.024971584 | -0.005419736 | 0.999933887 | -0.203087138 | -0.47305837   | 0.269971232  | 0.001546463 |
| ENSG000000140990 | NDUFB10    | 3.527518084  | 0.049236136  | 0.01203903   | 0.037197106  | 0.999933887 | -0.131783698 | -0.684326066  | 0.552542367  | 0.001546463 |
| ENSG000000156587 | UBE2L6     | 7.024718755  | 0.039792329  | -0.011170747 | 0.050963076  | 0.999933887 | -0.423122335 | -0.846973328  | 0.423850993  | 0.001546463 |
| ENSG000000120437 | ACAT2      | 4.236828779  | -0.037995823 | -0.030230712 | -0.005963112 | 0.999933887 | 1.672567215  | 2.152755871   | -0.480189756 | 0.001546463 |
| ENSG000000196588 | MRTFA      | 5.977846559  | -0.041794038 | 0.05183244   | -0.093626477 | 0.999933887 | -0.230960892 | -0.624934249  | 0.393973358  | 0.001570613 |
| ENSG000000040933 | INPP4A     | 5.24525316   | 0.016065675  | 0.006324758  | 0.009740917  | 0.999933887 | -0.323715569 | -0.72077693   | 0.397061361  | 0.001570613 |
| ENSG000000104154 | SLC30A4    | 4.390156780  | -0.180495187 | -0.159962524 | -0.020532663 | 0.999933887 | 2.055480905  | -0.904643447  | -0.904963443 | 0.00160586  |
| ENSG000000067334 | DNTTIP2    | 7.334978894  | -0.06754697  | -0.188661127 | 0.121114158  | 0.999933887 | 0.428847143  | 0.965127258   | -0.536280115 | 0.001615311 |
| ENSG000000119979 | DENDN10    | 4.309155494  | 0.061249476  | -0.028646492 | 0.089895968  | 0.999933887 | 0.38312913   | 0.742223497   | 0.38312913   | 0.001635524 |
| ENSG000000155099 | P1P4P2     | 3.862429569  | 0.005044049  | 0.128901532  | -0.123497483 | 0.999933887 | -0.991107923 | -1.560253105  | 0.569145182  | 0.001640256 |
| ENSG000000198839 | ZNF277     | 4.004704648  | -0.013454063 | -0.1308227   | 0.117368637  | 0.999933887 | 0.171511473  | 0.612101459   | -0.440589986 | 0.001649672 |
| ENSG000000279024 | AC112255.1 | 2.743371378  | -0.127262741 | -0.124491866 | -0.002770875 | 0.999933887 | 0.209670404  | 0.713410165   | -0.503739762 | 0.001651684 |
| ENSG000000078081 | LAMP3      | 2.401064945  | -0.004454341 | 0.107302014  | -0.111756354 | 0.999933887 | 1.57349036   | 2.452852864   | -0.879362504 | 0.001652104 |
| ENSG000000167508 | MVD        | 4.498744565  | 0.054299967  | 0.109066491  | -0.054766452 | 0.999933887 | 1.592507882  | 1.592507882   | -0.823442335 | 0.00167496  |
| ENSG000000140995 | DEF8       | 6.36772318   | -0.002342184 | 0.054379808  | -0.056721992 | 0.999933887 | -0.173883061 | -0.6949811503 | 0.521098442  | 0.001675025 |
| ENSG000000274536 | MIR223HG   | 4.723661018  | -0.11788132  | -0.057324685 | -0.059863447 | 0.999933887 | -0.251007326 | -0.771007163  | 0.519994305  | 0.001676707 |
| ENSG000000169598 | DFB        | 1.503030199  | -0.042271011 | 0.012382708  | -0.054653719 | 0.999933887 | -0.052257893 | -0.68361393   | 0.631356037  | 0.001682235 |
| ENSG000000163516 | ANKZF1     | 4.564474014  | 0.016028951  | 0.056994774  | -0.040965823 | 0.999933887 | -0.123431033 | -0.478604096  | 0.355173063  | 0.001682235 |
| ENSG000000172590 | MRPL52     | 2.630810029  | -0.098945318 | -0.145437301 | 0.046491983  | 0.999933887 | 1.187636568  | 1.873629861   | -0.685993293 | 0.001682453 |
| ENSG000000161542 | PRPSAP1    | 3.282556893  | 0.056994165  | -0.216489195 | 0.273483359  | 0.999933887 | 1.197885226  | 1.804721453   | -0.606836228 | 0.001682453 |
| ENSG000000236939 | BALC-AS2   | -1.645688777 | -0.032899637 | -0.411022327 | 0.378125785  | 0.999933887 | 1.576544307  | 2.401167707   | -0.82462277  | 0.001682453 |
| ENSG000000109787 | KLF3       | 6.818771052  | -0.032585855 | -0.019248699 | 0.013337156  | 0.999933887 | -1.122306337 | -1.564926625  | 0.442620288  | 0.00168609  |
| ENSG000000172531 | PPPI1CA    | 6.283589868  | 0.001772759  | -0.018459099 | 0.020186358  | 0.999933887 | -0.619176009 | -0.595944444  | 0.44041844   | 0.00168609  |
| ENSG000000213445 | SIP1A      | 8.006244098  | 0.058689015  | 0.078346631  | -0.019657616 | 0.999933887 | -0.344905388 | -0.721700001  | 0.376794613  | 0.001693511 |
| ENSG000000213889 | PPM1N      | 1.437522558  | -0.074964866 | 0.096032198  | -0.170997064 | 0.999933887 | 0.525201017  | 1.232943334   | -0.707742318 | 0.001698453 |
| ENSG000000137413 | TA8        | 3.562354095  | -0.01151045  | -0.038784328 | 0.027363878  | 0.999933887 | -0.565437652 | -1.049828056  | 0.484390404  | 0.001734874 |
| ENSG000000068831 | RASGRP2    | 7.032998288  | 0.053206782  | 0.051136045  | 0.002070737  | 0.999933887 | -0.031169255 | -0.423580516  | 0.397181561  | 0.001742917 |
| ENSG000000129922 | SEM1       | 3.33065659   | 0.001532115  | -0.061587509 | 0.063119624  | 0.999933887 | 0.034290185  | 0.337048787   | -0.371338973 | 0.001742917 |
| ENSG000000134797 | NUMA1      | 6.810838926  | 0.110860981  | 0.063729587  | 0.047131394  | 0.999933887 | 0.573070869  | 0.92102668    | -0.347955811 | 0.001744885 |
| ENSG000000155304 | HSPA13     | 4.779867695  | -0.020014688 | -0.155868825 | 0.135854137  | 0.999933887 | 0.316748662  | 0.812179621   | -0.495430959 | 0.001744885 |
| ENSG000000129071 | MBD4       | 4.974586653  | -0.095242732 | -0.140746988 | 0.045504256  | 0.999933887 | -0.842956781 | -1.234858448  | 0.391901667  | 0.001745406 |
| ENSG000000220008 | LINGO3     | 3.976532118  | -0.030148705 | -0.072090778 | 0.041942073  | 0.999933887 | -0.778475064 | -1.582952969  | 0.804477905  | 0.001754444 |
| ENSG000000237522 | NONOP2     | 1.334090772  | -0.125249046 | -0.045135625 | -0.080113221 | 0.999933887 | 0.635544109  | 1.648867575   | -1.013323466 | 0.001769364 |
| ENSG000000115275 | MOGS       | 4.361345817  | 0.016988322  | 0.066874978  | -0.049886655 | 0.999933887 | -0.045483979 | -0.349613572  | 0.304165193  | 0.001770791 |
| ENSG000000183091 | NEB        | 1.243723659  | -0.14358762  | -0.160537684 | 0.017078922  | 0.999933887 | 0.218144842  | 1.139046986   | -0.920902154 | 0.001815722 |
| ENSG000000115825 | PRKD3      | 3.82092935   | -0.086586725 | -0.097296291 | 0.010709566  | 0.999933887 | 0.219408738  | 0.848403476   | -0.628994738 | 0.001815722 |
| ENSG00000014440  | GNB4       | 3.349327964  | -0.094815655 | -0.052125658 | -0.144941313 | 0.999933887 | -1.364311479 | -2.068364665  | 0.704053187  | 0.00181681  |
| ENSG000000287626 | AL021978.1 | 4.553455939  | -0.090241026 | -0.050632908 | -0.039608118 | 0.999933887 | 0.387408228  | 0.748345576   | -0.360937348 | 0.001818128 |
| ENSG000000130309 | COLGALT1   | 4.986161427  | 0.040774316  | -0.020313227 | 0.01087542   | 0.999933887 | -0.103504597 | -0.426274886  | 0.322770289  | 0.001845295 |
| ENSG000000139178 | C1RL       | 0.969060745  | -0.021411455 | -0.000540045 | -0.020870501 | 0.999933887 | -0.244497221 | -0.575434012  | 0.330932792  | 0.001897128 |
| ENSG000000213390 | ARHGAP19   | 3.207387212  | -0.0274166   |              |              |             |              |               |              |             |

|                  |            |              |              |              |              |             |              |               |              |             |
|------------------|------------|--------------|--------------|--------------|--------------|-------------|--------------|---------------|--------------|-------------|
| ENSG00000108100  | CCNY       | 6.394786948  | -0.023028271 | -0.012109427 | -0.010918843 | 0.999933887 | -0.733654533 | -1.128856564  | 0.395202031  | 0.002313026 |
| ENSG00000166548  | TK2        | 2.963674087  | 0.006032504  | 0.082158369  | -0.076125865 | 0.999933887 | -0.575855302 | -1.266070035  | 0.690214733  | 0.002317107 |
| ENSG000000279833 | AL031846.2 | 2.427553033  | -0.057611873 | -0.143792497 | 0.086180624  | 0.999933887 | -0.715010818 | -1.379967683  | 0.664956865  | 0.002320205 |
| ENSG00000135926  | TMBIM1     | 7.589919248  | -0.012112756 | -0.005020194 | -0.007092562 | 0.999933887 | 0.493458359  | 0.857228672   | -0.363770313 | 0.002329934 |
| ENSG00000066583  | ISOC1      | 2.769033518  | -0.138152847 | 0.083158771  | -0.221311618 | 0.999933887 | -0.237037245 | -0.83263441   | 0.595597165  | 0.002337699 |
| ENSG00000123374  | CDK2       | 2.639281403  | -0.097077101 | 0.068074622  | -0.166151723 | 0.999933887 | 0.50529125   | -1.098018678  | -0.592727429 | 0.002338735 |
| ENSG00000266094  | RASSF5     | 9.961578567  | 0.022709938  | 0.006430665  | 0.016279274  | 0.999933887 | 0.442366128  | 0.71643687    | -0.274070742 | 0.002383735 |
| ENSG00000160211  | G6PD       | 6.814452304  | 0.011346899  | 0.005126583  | 0.006220316  | 0.999933887 | -0.667288606 | -1.008758773  | 0.420299167  | 0.002392071 |
| ENSG00000188986  | NELFB      | 4.148545652  | 0.068294079  | 0.10006045   | -0.031766374 | 0.999933887 | -0.276523665 | -0.73414223   | 0.457618565  | 0.002394411 |
| ENSG00000125733  | TRIP10     | 2.551928679  | -0.071028259 | -0.08243836  | 0.153462095  | 0.999933887 | 2.354667286  | -0.136407895  | 0.808740609  | 0.002394411 |
| ENSG00000092421  | SEMA6A     | 0.600104887  | -0.047206097 | 0.378426768  | -0.425632865 | 0.999933887 | 0.63777397   | 1.636308074   | -0.998534105 | 0.002394411 |
| ENSG000000062194 | GPBP1      | 6.751214588  | -0.080300895 | -0.121577691 | 0.041276796  | 0.999933887 | 0.551872992  | 0.982767261   | -0.430894269 | 0.002397925 |
| ENSG000000008513 | ST3GAL1    | 7.796866626  | 0.010942557  | 0.000621332  | 0.010321225  | 0.999933887 | 0.916748062  | 1.329552178   | -0.412804116 | 0.002403977 |
| ENSG00000261971  | MMP25-AS1  | 5.511641175  | -0.028590294 | -0.032033542 | 0.003443248  | 0.999933887 | -0.92362772  | -1.560659627  | 0.637031907  | 0.002418034 |
| ENSG00000133048  | CHI3L1     | 7.298293087  | 0.07447316   | 0.012835717  | 0.061637443  | 0.999933887 | 1.787883781  | 2.443479662   | -0.65559588  | 0.002444117 |
| ENSG00000115604  | IL18R1     | 3.944306597  | -0.062059126 | -0.119712524 | 0.057653398  | 0.999933887 | 0.055128983  | 0.490487167   | -0.435358184 | 0.002447732 |
| ENSG00000115840  | SLC25A12   | 1.890968647  | -0.097724548 | -0.068900312 | -0.028624236 | 0.999933887 | 0.817886687  | 1.544617615   | -0.726730928 | 0.002447732 |
| ENSG00000133476  | ESPL1      | 2.381463282  | -0.036280769 | -0.054239259 | 0.01795849   | 0.999933887 | 2.333748068  | 3.165769852   | -0.832021784 | 0.002447732 |
| ENSG00000095794  | CREM       | 5.925942737  | 0.029096978  | -0.067529032 | 0.09662601   | 0.999933887 | 0.438736382  | 0.906444263   | -0.467707881 | 0.002449348 |
| ENSG00000118260  | CREB1      | 6.037625303  | -0.019437578 | -0.082392162 | 0.061094584  | 0.999933887 | 0.251395108  | 0.682392041   | -0.430996934 | 0.002457077 |
| ENSG00000232713  | RPS12P3    | 0.299621248  | -0.137212722 | -0.180441551 | 0.043228828  | 0.999933887 | 0.612072476  | 1.671274223   | -1.059201747 | 0.002494288 |
| ENSG00000165097  | KDM1B      | 5.730215038  | -0.045918313 | -0.01787156  | -0.028046952 | 0.999933887 | 0.505307154  | 0.874465178   | 0.369158024  | 0.002494288 |
| ENSG00000137364  | TPMT       | 2.959678014  | 0.04057513   | -0.007217559 | 0.047792689  | 0.999933887 | 1.024746576  | 1.555289262   | -0.530542686 | 0.002494288 |
| ENSG00000166189  | HPS6       | 2.755354464  | 0.043906145  | 0.077327947  | -0.033331801 | 0.999933887 | -0.464453677 | -1.023353598  | 0.558899922  | 0.002545761 |
| ENSG00000163964  | PIGX       | 4.874886232  | 0.011288634  | 0.033529869  | -0.022241235 | 0.999933887 | -0.66474325  | -1.223278077  | 0.558534828  | 0.002546999 |
| ENSG00000178149  | DALRD1     | 2.395961504  | 0.084829019  | -0.058414468 | 0.143243487  | 0.999933887 | -0.227892376 | -0.660299131  | 0.432406754  | 0.002551886 |
| ENSG00000092094  | OSGEP      | 3.993841008  | -0.11424466  | 0.057205296  | -0.171329762 | 0.999933887 | -0.77540424  | 0.427806744   | 0.002564032  | 0.002564032 |
| ENSG00000160209  | PDXK       | 7.056255017  | -0.033226711 | -0.034768376 | 0.001541665  | 0.999933887 | 1.253242723  | 1.678335101   | -0.425092378 | 0.002564032 |
| ENSG00000160602  | NEK8       | 0.9757343057 | 0.040079949  | -0.047853426 | 0.087933375  | 0.999933887 | 0.387880868  | -1.12954394   | -0.725073526 | 0.002564032 |
| ENSG00000206562  | METTL6     | 2.106586494  | 0.029820063  | -0.280162645 | 0.309982708  | 0.999933887 | 0.970812388  | 1.418153252   | -0.447340864 | 0.002564032 |
| ENSG00000124508  | BTN2A2     | 5.712504717  | 0.037384723  | 0.026732331  | -0.010652392 | 0.999933887 | 2.008161977  | 2.479059055   | -0.470897078 | 0.002580204 |
| ENSG00000159840  | ZYX        | 8.790142027  | 0.017056816  | 0.018616718  | -0.001559902 | 0.999933887 | -0.590649411 | -0.3496923749 | 0.3949974338 | 0.002592451 |
| ENSG00000139192  | TAPBPL     | 4.596463977  | 0.043448015  | -0.002827944 | 0.046275959  | 0.999933887 | -0.312975242 | -0.754779517  | 0.441804275  | 0.002606478 |
| ENSG00000133313  | CNDP2      | 4.608996209  | 0.022401523  | -0.05800886  | 0.080410383  | 0.999933887 | -0.253418521 | -0.591840123  | 0.338421602  | 0.002617961 |
| ENSG00000213918  | DNASE1     | 3.599285017  | 0.013305263  | 0.056286572  | -0.042963309 | 0.999933887 | -0.191752147 | -0.568086273  | 0.376334126  | 0.002632533 |
| ENSG00000118564  | FBXL5      | 8.633766787  | -0.064202114 | -0.123585657 | 0.059383543  | 0.999933887 | -0.092244007 | 0.215494442   | -0.307738449 | 0.002632813 |
| ENSG00000146802  | TMEM168    | 3.201490893  | -0.13095364  | -0.148639298 | -0.015543934 | 0.999933887 | 0.32454347   | 0.826422399   | -0.501878928 | 0.002648581 |
| ENSG00000056586  | RC3H2      | 5.353354228  | -0.005702929 | -0.048992279 | 0.04328935   | 0.999933887 | -0.259572243 | 0.137624426   | -0.397196669 | 0.002672593 |
| ENSG00000264364  | DYNNL2     | 5.602166541  | 0.026052106  | -0.00544764  | 0.031499746  | 0.999933887 | -0.157730073 | -0.497280085  | 0.339550012  | 0.00268074  |
| ENSG00000155629  | PIK3AP1    | 9.084398979  | -0.028339643 | -0.009231798 | -0.019107845 | 0.999933887 | 2.063245188  | 2.617862778   | -0.55461759  | 0.002684578 |
| ENSG00000148331  | ASB6       | 3.84151362   | -0.016636822 | -0.041763586 | 0.025126964  | 0.999933887 | -0.529227845 | 0.372984487   | 0.372984487  | 0.002684578 |
| ENSG00000065613  | SLK        | 6.710355186  | -0.113524791 | -0.142769087 | 0.029244296  | 0.999933887 | 0.91109654   | 1.704582594   | -0.793486054 | 0.002698269 |
| ENSG00000163932  | PRKCD      | 9.270942921  | -0.033901815 | -0.017170908 | -0.016730907 | 0.999933887 | 0.597591874  | 0.916654917   | -0.319063043 | 0.002701117 |
| ENSG00000166188  | ZNF319     | 4.129823931  | 0.08138889   | 0.033630597  | 0.074508293  | 0.999933887 | -0.623621009 | -1.08359353   | 0.459972521  | 0.002712351 |
| ENSG00000203880  | PCMTD2     | 4.362727894  | -0.056751708 | -0.076213235 | 0.019479527  | 0.999933887 | -0.283602314 | -0.647479749  | 0.363877436  | 0.002712351 |
| ENSG00000090376  | IRAK3      | 7.08762894   | -0.109851147 | -0.088190348 | -0.021660799 | 0.999933887 | 1.462172614  | -0.258982742  | -0.623810128 | 0.002712351 |
| ENSG00000137221  | TJAP1      | 5.307584713  | 0.034370377  | 0.02203215   | 0.012338212  | 0.999933887 | 0.880159243  | 1.182856853   | -0.302697609 | 0.002712351 |
| ENSG00000185988  | RASA3      | 6.326004302  | 0.02276308   | -0.007824158 | 0.030587238  | 0.999933887 | -0.193152516 | -0.442968951  | 0.249816435  | 0.002712351 |
| ENSG00000115738  | ID2        | 7.080543458  | 0.011864998  | 0.093869521  | -0.082004522 | 0.999933887 | 1.898915125  | 2.670421608   | -0.771506463 | 0.002729525 |
| ENSG00000112679  | DUSP22     | 5.039557682  | 0.033037801  | 0.024506447  | 0.008531353  | 0.999933887 | -0.290657429 | -0.633442924  | 0.342785495  | 0.002746223 |
| ENSG00000105483  | CARD8      | 7.231027526  | -0.023960024 | 0.03330916   | 0.020349136  | 0.999933887 | -1.027603823 | -1.460434015  | 0.338230192  | 0.002746223 |
| ENSG00000100591  | AHSA1      | 3.724631672  | -0.026611221 | 0.008534942  | -0.035146163 | 0.999933887 | -0.170148821 | -0.520793799  | 0.350644978  | 0.002754402 |
| ENSG00000173825  | TIGD3      | 1.957627318  | -0.050490603 | -0.004024942 | -0.046465661 | 0.999933887 | -1.512773431 | -2.567321881  | 1.05454845   | 0.002785033 |
| ENSG00000133612  | AGAP3      | 7.041055357  | 0.002562884  | -0.010903673 | 0.013466557  | 0.999933887 | 0.657611621  | 1.000854662   | -0.343243041 | 0.002780513 |
| ENSG00000182446  | NPLOC4     | 6.591044263  | 0.021428801  | -0.024278539 | 0.045707341  | 0.999933887 | 0.686240662  | 1.041123049   | -0.354882387 | 0.002785955 |
| ENSG00000204396  | VWA7       | 4.454746738  | -0.413431864 | -0.136013284 | -0.27741858  | 0.999933887 | -0.364773797 | -1.273658951  | 0.908885154  | 0.002793785 |
| ENSG00000101187  | SLCO4A1    | 4.093211452  | 0.113688839  | 0.153083988  | -0.03895149  | 0.999933887 | 0.978266326  | 1.489573685   | -0.511307359 | 0.002793785 |
| ENSG00000100024  | UPB1       | 5.38810352   | -0.033903264 | -0.042398388 | 0.008495123  | 0.999933887 | 1.719014537  | 2.151491105   | -0.432476568 | 0.002793785 |
| ENSG00000201504  | NEURL4     | 3.178217245  | 0.114275605  | -0.017132127 | 0.131407732  | 0.999933887 | 0.044001523  | -0.388557283  | 0.432558806  | 0.002806915 |
| ENSG00000160593  | JAML       | 8.583024809  | -0.064255283 | -0.044334219 | -0.019912064 | 0.999933887 | -0.285417048 | -0.70666386   | 0.421246788  | 0.002806915 |
| ENSG00000078269  | SYNJ2      | 4.466846953  | 0.036701493  | 0.048406484  | -0.011704991 | 0.999933887 | 1.715611824  | 2.370756344   | -0.65514452  | 0.002806915 |
| ENSG00000154822  | PLCL2      | 5.178191039  | -0.024172011 | -0.039577334 | 0.015405323  | 0.999933887 | 0.204718951  | 0.697552665   | -0.492833714 | 0.002869596 |
| ENSG000002071856 | LINC01215  | 4.579493114  | -0.017005053 | -0.024492734 | 0.007487695  | 0.999933887 | 1.040497298  | 1.495126879   | -0.454629581 | 0.002869596 |
| ENSG00000130402  | ACTN4      | 7.554141173  | 0.054999819  | 0.009640658  | 0.045359161  | 0.999933887 | -0.331311565 | -0.677221251  | 0.345909686  | 0.002869596 |
| ENSG00000118217  | ATF6       | 5.161307879  | 0.020329401  | -0.059750636 | 0.080080237  | 0.999933887 | 0.266660409  | 0.622468593   | 0.002898289  | 0.002898289 |
| ENSG000000072110 | ACTN1      | 8.613777521  | 0.03723982   | 0.011204435  | 0.026035385  | 0.999933887 | -0.646361342 | 0.963597093   | 0.317236561  | 0.002906618 |
| ENSG00000103769  | RAB11A     | 5.851917115  | -0.025978462 | 0.004799202  | -0.030777663 | 0.999933887 | 0.338164488  | 0.966257805   | -0.328561298 | 0.002906618 |
| ENSG00000070081  | NUCB2      | 3.000649652  | -0.180351207 | -0.212883365 | 0.032532158  | 0.999933887 | -0.009387797 | 0.678264262   | -0.687652058 | 0.00290939  |
| ENSG00000154642  | C21orf91   | 3.842250963  | -0.074562692 | -0.008271299 | -0.066291393 | 0.999933887 | 0.397970982  | 1.03188628    | -0.633915298 | 0.002940265 |
| ENSG00000188186  | LAMTOR4    | 6.434991117  | -0.005298481 | -0.00176232  | -0.007060802 | 0.999933887 | -0.211772971 | -0.605557219  | 0.388784248  | 0.002968487 |
| ENSG00000135269  | TES        | 5.089620949  | -0.00682557  | -0.038205    | 0.03137943   | 0.999933887 | 0.504052215  |               |              |             |

|                  |            |              |              |               |               |             |              |              |               |             |
|------------------|------------|--------------|--------------|---------------|---------------|-------------|--------------|--------------|---------------|-------------|
| ENSG00000134352  | IL6ST      | 5.132124922  | -0.041119672 | -0.212383357  | 0.171263685   | 0.999933887 | 0.191960766  | 0.959876934  | -0.767916168  | 0.003354118 |
| ENSG00000035403  | VCL        | 5.590052861  | 0.008567832  | -0.052107086  | 0.060674918   | 0.999933887 | 0.217201353  | 0.513499747  | -0.296298394  | 0.003354118 |
| ENSG000000253256 | AC13043.2  | -0.390743575 | 0.018032636  | 0.191306471   | -0.173273835  | 0.999933887 | 0.572276871  | 1.409781174  | -0.837504304  | 0.003354118 |
| ENSG00000138600  | SPPL2A     | 6.255438196  | -0.041055486 | -0.052152663  | 0.011097177   | 0.999933887 | 0.741317454  | 1.10603271   | -0.364715256  | 0.00335678  |
| ENSG00000168438  | CDC40      | 3.741498982  | -0.084586015 | -0.0113359504 | -0.071206511  | 0.999933887 | -0.61641209  | -1.091365564 | 0.474953474   | 0.00339547  |
| ENSG00000164142  | FAM160A1   | 0.212239124  | -0.01797775  | 0.084684194   | -0.102661944  | 0.999933887 | 1.335667954  | 2.489065458  | -1.553937504  | 0.003397039 |
| ENSG00000176619  | LMNB2      | 3.384593781  | 0.138864783  | 0.021949729   | 0.116897054   | 0.999933887 | 1.008870369  | 1.658325873  | -0.649455504  | 0.003422121 |
| ENSG00000088888  | MAVS       | 4.804922006  | -0.00439618  | 0.009784215   | -0.014180396  | 0.999933887 | -0.205763358 | 0.576077056  | 0.367007199   | 0.003422121 |
| ENSG00000138760  | SCARB2     | 3.176147309  | -0.010322383 | -0.0063092    | -0.004013183  | 0.999933887 | -0.482817267 | -0.982895718 | 0.500078452   | 0.003477086 |
| ENSG00000144283  | PKP4       | 3.580449543  | -0.031581971 | 0.089436059   | -0.12101803   | 0.999933887 | -0.887949375 | -1.371557804 | 0.483708429   | 0.003477824 |
| ENSG00000033800  | PIAS1      | 6.778675487  | -0.029146011 | -0.039512698  | 0.010366687   | 0.999933887 | 0.078456966  | 0.465827764  | -0.387370798  | 0.00350511  |
| ENSG00000142751  | GNP2       | 3.604075023  | -0.060285754 | -0.131968099  | -0.192253853  | 0.944094537 | -0.146047919 | -0.453790895 | 0.307742977   | 0.003507203 |
| ENSG00000115091  | ACTR3      | 9.497681864  | -0.016939671 | -0.004535351  | -0.01240432   | 0.999933887 | 0.744096652  | 1.016079013  | -0.271982361  | 0.003507203 |
| ENSG00000110756  | HPS5       | 5.660160961  | -0.015438068 | -0.024960759  | 0.009522691   | 0.999933887 | 0.535529523  | 0.94244861   | -0.406919087  | 0.003520319 |
| ENSG00000286281  | AL353152.2 | 1.380117748  | -0.0526744   | 0.381520884   | -0.434195283  | 0.999933887 | 0.525299865  | 1.118843439  | -0.593543575  | 0.003527351 |
| ENSG00000154310  | TNKK       | 4.472668381  | -0.02589935  | -0.023064169  | -0.002835181  | 0.999933887 | 0.01825107   | 0.515539388  | -0.497288318  | 0.003530991 |
| ENSG00000236416  | JRK        | 3.054569016  | -0.088559343 | -0.001256303  | -0.08730304   | 0.999933887 | -0.188885187 | -0.545397507 | 0.356512319   | 0.003548404 |
| ENSG00000160446  | ZDHHC12    | 3.830894813  | 0.095166956  | -0.03379384   | 0.128960797   | 0.999933887 | -0.467119713 | -1.017273593 | 0.55015388    | 0.003548404 |
| ENSG00000151726  | ACSL1      | 10.068648973 | -0.061427846 | -0.051561798  | -0.009866048  | 0.999933887 | 1.739207772  | 2.242398127  | -0.503190356  | 0.003548404 |
| ENSG00000186008  | GSAP       | 5.36394477   | -0.025326702 | -0.003094197  | -0.022142505  | 0.999933887 | 1.081895612  | 1.611017854  | -0.529122243  | 0.003548404 |
| ENSG00000126561  | STAT5A     | 8.046770933  | -0.028086008 | 0.004867381   | -0.03295339   | 0.999933887 | 2.540926236  | 3.164184309  | -0.623258073  | 0.00355842  |
| ENSG00000184640  | SEPTIN9    | 7.773937361  | 0.012953249  | -0.018900762  | 0.031854011   | 0.999933887 | -0.303133668 | -0.665597937 | 0.362466069   | 0.003589577 |
| ENSG00000252172  | RNU6-720P  | 0.092766874  | -0.406520971 | 0.488079678   | -0.894600649  | 0.944094537 | -0.484273349 | 0.189759258  | -0.674032806  | 0.003601601 |
| ENSG00000173465  | ZNRD2      | 2.968275222  | -0.021048251 | -0.063113503  | 0.042065251   | 0.999933887 | 0.524675721  | 1.001415574  | -0.476739853  | 0.003601601 |
| ENSG00000121552  | CSTA       | 4.267479694  | 0.002654431  | 0.0322774     | -0.029622969  | 0.999933887 | 0.628914949  | 1.066158298  | -0.437243349  | 0.003652967 |
| ENSG00000258926  | AL355916.2 | 2.935949204  | 0.030359452  | -0.001884067  | 0.03243519    | 0.999933887 | 0.957629468  | 1.687258534  | -0.729629066  | 0.003668712 |
| ENSG00000112773  | TENT5A     | 3.868766283  | -0.065597842 | -0.07544464   | 0.009846798   | 0.999933887 | -0.620939851 | -1.082991046 | 0.462051196   | 0.003675416 |
| ENSG00000196663  | TECPR2     | 8.165887867  | -0.017928469 | -0.018410393  | 0.000481923   | 0.999933887 | 0.779724339  | 1.081531458  | -0.301807119  | 0.003675416 |
| ENSG000000065413 | ANKRD44    | 7.109570287  | -0.032583703 | -0.053911519  | 0.021327816   | 0.999933887 | -0.477124701 | -0.980648931 | 0.50352423    | 0.00369443  |
| ENSG00000158773  | USF1       | 6.062661124  | -0.041874777 | -0.002393976  | -0.039480801  | 0.999933887 | -0.422877948 | -0.773367211 | 0.350489263   | 0.003745502 |
| ENSG00000176597  | B3GN75     | 7.391567201  | 0.036345042  | -0.031855209  | 0.068200071   | 0.999933887 | 0.261578409  | 0.72214835   | -0.460569941  | 0.003745502 |
| ENSG00000065526  | SPEN       | 6.913763594  | -0.033829708 | -0.061404342  | 0.027574634   | 0.999933887 | -0.860188755 | -1.307759648 | 0.447570892   | 0.003748876 |
| ENSG00000104093  | DMXL2      | 7.115930314  | -0.166292375 | -0.144452313  | -0.021840062  | 0.999933887 | 1.793565171  | 2.763992880  | -0.970427717  | 0.003762073 |
| ENSG00000163444  | TMEM183A   | 4.730113702  | 0.000413074  | 0.0077900736  | -0.007487682  | 0.999933887 | -0.248013912 | 0.308390926  | 0.308377014   | 0.003762073 |
| ENSG00000131899  | LLGL1      | 3.125475589  | 0.030769752  | -0.003366149  | 0.0341359     | 0.999933887 | -0.019131111 | -0.387669327 | 0.368538217   | 0.003765578 |
| ENSG00000167264  | DUS2       | 3.472864256  | -0.134978211 | -0.016552567  | -0.118425643  | 0.999933887 | -1.691043981 | -2.380859799 | 0.689809998   | 0.003818742 |
| ENSG00000142046  | TMEM91     | 3.430651765  | 0.055121604  | 0.03699647    | 0.015426844   | 0.999933887 | 0.048527165  | -0.505256271 | 0.505256271   | 0.003818742 |
| ENSG00000154153  | RETRG1     | 3.045126496  | -0.096098633 | -0.006397073  | -0.08970156   | 0.999933887 | 0.524573059  | 1.080640489  | -0.55606743   | 0.003839672 |
| ENSG00000111371  | SLC38A1    | 6.985376936  | -0.066231091 | -0.09041068   | 0.032809977   | 0.999933887 | 0.076549323  | -0.506967999 | 0.003884438   | 0.003884438 |
| ENSG00000163539  | CLASP2     | 3.570597366  | -0.066273293 | -0.001564242  | -0.064709051  | 0.999933887 | 0.146597484  | 0.680268622  | -0.533671138  | 0.003888643 |
| ENSG00000159556  | ISL2       | 0.587985461  | -0.176985224 | 0.290239474   | -0.467224698  | 0.944094537 | -0.986376159 | -2.088996472 | 1.102520314   | 0.003906181 |
| ENSG00000179163  | FUCA1      | 3.328650257  | -0.201737404 | 0.028779466   | -0.230516869  | 0.999933887 | -0.757927105 | -1.25428409  | 0.496320984   | 0.003910623 |
| ENSG00000136044  | APPL2      | 5.0402989    | -0.075198122 | -0.039582297  | -0.036027525  | 0.999933887 | -0.568732858 | -0.96048438  | 0.337315581   | 0.003910623 |
| ENSG00000153048  | CARHSP1    | 3.003723714  | 0.089445724  | 0.048796532   | 0.040649192   | 0.999933887 | -0.139235879 | -0.675678001 | 0.536442122   | 0.003910623 |
| ENSG00000197948  | FCHSD1     | 5.986270261  | 0.028791371  | 0.107658686   | -0.078865495  | 0.999933887 | -0.317715367 | -0.66094634  | 0.343230973   | 0.003910623 |
| ENSG00000100612  | DHR57      | 6.150034897  | -0.030013777 | -0.094336588  | 0.064372811   | 0.999933887 | -1.024403615 | -1.458835851 | 0.43432237    | 0.003910623 |
| ENSG00000142327  | RNPEPL1    | 6.492476826  | -0.015655563 | 0.009361198   | -0.025016761  | 0.999933887 | -0.475347543 | -0.826474284 | 0.351126741   | 0.003910623 |
| ENSG00000067992  | POK3       | 5.211505824  | -0.091912754 | -0.09192784   | 1.5085e-05    | 0.999933887 | -1.322713757 | -1.808945472 | 0.486231985   | 0.003917996 |
| ENSG00000171368  | TPPP       | 2.237900123  | -0.101150927 | -0.022793786  | -0.078357141  | 0.999933887 | 1.036882267  | 2.148356758  | -1.111474491  | 0.003927935 |
| ENSG00000255823  | MTRNR2L8   | 1.76121405   | -0.19908938  | -0.122806857  | -0.076282523  | 0.999933887 | 2.036025584  | 2.829976688  | -0.793951103  | 0.003940125 |
| ENSG00000132589  | FLOT2      | 7.777917681  | 0.023389402  | -0.046249787  | 0.06963919    | 0.999933887 | 0.419295446  | 0.7762401    | -0.356944655  | 0.003966922 |
| ENSG00000104450  | SPAG1      | 2.417431086  | -0.00974323  | 0.027593931   | -0.037337161  | 0.999933887 | 0.574549554  | 1.233261211  | -0.658711656  | 0.003966922 |
| ENSG00000285851  | SIGLEC18P  | -1.192952733 | 0.135592842  | -0.082939914  | -0.1218586756 | 0.999933887 | 1.225787282  | 2.091602133  | -0.86581485   | 0.003990503 |
| ENSG00000115325  | DOK1       | 4.17051304   | 0.015960695  | 0.008617542   | 0.007343153   | 0.999933887 | -0.68774336  | -1.170507141 | 0.482763781   | 0.003999376 |
| ENSG00000166670  | MMP10      | 0.244724504  | 0.244365067  | 0.025311803   | 0.219053264   | 0.999933887 | 1.086922871  | 2.180863596  | -1.093940725  | 0.004012324 |
| ENSG00000188483  | IERSL      | 2.012554191  | -0.226874126 | -0.133483449  | -0.093390678  | 0.999933887 | -1.463953544 | -2.238153767 | 0.774200225   | 0.004030639 |
| ENSG00000159055  | MIS18A     | 0.059401798  | 0.076541772  | 0.07703561    | -0.000493738  | 0.999933887 | 1.051614328  | 2.093900411  | -1.042286083  | 0.004030639 |
| ENSG00000163625  | WDFY3      | 7.528504268  | -0.034786371 | -0.0603605    | 0.025574129   | 0.999933887 | 0.566372105  | 0.963652467  | -0.397280362  | 0.004054681 |
| ENSG00000188921  | HACD4      | 4.641438929  | 0.079396831  | -0.048243659  | 0.12764049    | 0.999933887 | -0.264116932 | -0.760208373 | 0.49609144    | 0.004056109 |
| ENSG00000139146  | SIN3HAF    | 3.611462925  | -0.067886744 | 0.016128765   | -0.084015508  | 0.999933887 | 0.132495295  | -0.34477783  | 0.00406207    | 0.00406207  |
| ENSG00000137486  | ARRB1      | 5.343553556  | -0.014590191 | -0.00429512   | -0.010295071  | 0.999933887 | -0.866264838 | -1.336572911 | 0.470308073   | 0.00406207  |
| ENSG00000114268  | PKFB4      | 4.404363198  | -0.042253388 | 0.038297866   | -0.080551053  | 0.999933887 | -0.328299458 | -0.961046495 | 0.632747037   | 0.004077578 |
| ENSG00000131100  | ATP6V1E1   | 7.063438553  | -0.033403212 | -0.051873715  | 0.018470503   | 0.999933887 | 0.157149539  | 0.158743883  | -0.2725889291 | 0.004088839 |
| ENSG00000198189  | HSD17B11   | 6.348771611  | -0.06404765  | -0.079305914  | 0.015258263   | 0.999933887 | -0.481993316 | -0.935804481 | 0.453811166   | 0.004091068 |
| ENSG00000115234  | SNX17      | 5.046035121  | 0.060397094  | 0.031490657   | 0.028906437   | 0.999933887 | -0.166106617 | -0.498674125 | 0.332567508   | 0.004091108 |
| ENSG00000142765  | SYTL1      | 5.983923265  | 0.034349882  | 0.060517577   | -0.017167694  | 0.999933887 | -0.009747115 | -0.338940468 | 0.329193533   | 0.004102848 |
| ENSG00000167703  | SLC43A2    | 9.386692836  | 0.030732194  | 0.007083172   | 0.023649022   | 0.999933887 | 0.392319238  | -0.275724123 | 0.00413189    | 0.00413189  |
| ENSG00000092964  | DPYSL2     | 1.516399616  | -0.081106434 | -0.05257484   | -0.028531594  | 0.999933887 | -0.199799268 | -0.81111552  | 0.611316251   | 0.004137556 |
| ENSG00000197208  | SLC22A4    | 4.663140869  | 0.062518543  | 0.0028196     | 0.059698942   | 0.999933887 | -0.517467547 | -0.891277953 | 0.373810406   | 0.004141236 |
| ENSG00000110660  | SLC35F2    | 1.950890288  | 0.153761983  | -0.087485099  | 0.241247082   | 0.999933887 | 1.64940502   | 2.24336956   | -0.59396454   | 0.004141236 |
| ENSG00000160213  | CSTB       | 7.738179036  | 0.114107384  | 0.051101105   | 0.063006278   | 0.999933887 | 0.955346839  |              |               |             |

|                  |            |              |              |              |              |             |              |              |              |             |
|------------------|------------|--------------|--------------|--------------|--------------|-------------|--------------|--------------|--------------|-------------|
| ENSG00000103489  | XYLT1      | 5.06294553   | -0.026349581 | 0.003066153  | -0.029415734 | 0.999933887 | -0.344490256 | -0.752094056 | 0.4076038    | 0.004722737 |
| ENSG00000187009  | EXD3       | 2.602745193  | -0.002493101 | 0.063450139  | -0.06594324  | 0.999933887 | 0.300914588  | 0.732263144  | -0.431348556 | 0.004733331 |
| ENSG00000101040  | ZMYND8     | 3.945362033  | -0.022805364 | -0.047364055 | 0.024558692  | 0.999933887 | -0.333446741 | -0.739928545 | 0.406481804  | 0.004746279 |
| ENSG00000100297  | MCM5       | 3.852564574  | -0.008402128 | 0.03451027   | -0.042912399 | 0.999933887 | -0.132403369 | -0.476554511 | 0.344151142  | 0.004746279 |
| ENSG00000135604  | STX11      | 5.853671189  | 0.089947586  | 0.0614051    | 0.028542487  | 0.999933887 | 1.000738584  | 1.294388115  | -0.293629531 | 0.004758562 |
| ENSG00000104216  | CAPN1      | 5.698581057  | 0.050832359  | -0.008112252 | 0.058944611  | 0.999933887 | -0.231761412 | -0.592428705 | 0.360667293  | 0.004775836 |
| ENSG00000196814  | MVB12B     | 2.794815731  | 0.013962397  | 0.036165084  | -0.021202688 | 0.999933887 | 0.549326375  | 1.153857527  | -0.604531152 | 0.004775836 |
| ENSG00000141569  | TRIM65     | 2.189479855  | 0.099983792  | 0.001262756  | 0.098721036  | 0.999933887 | 0.13433308   | 0.315475577  | 0.449806657  | 0.004791884 |
| ENSG00000124102  | PI3        | 9.348727601  | -0.043228343 | 0.037985421  | -0.081213764 | 0.999933887 | 2.287084983  | 2.981097968  | -0.694012985 | 0.004824025 |
| ENSG00000185475  | TMEM179B   | 2.298995691  | 0.064466574  | -0.018624372 | 0.083090946  | 0.999933887 | -0.364158307 | -1.040802761 | 0.876644363  | 0.004858196 |
| ENSG00000040680  | CAMKK1     | 4.438083525  | -0.052362933 | -0.022991985 | -0.029370948 | 0.999933887 | -1.459370694 | -1.95858571  | 0.499215015  | 0.004910284 |
| ENSG00000175634  | RPS6KB2    | 4.327590061  | 0.038621863  | 0.044990272  | -0.006368409 | 0.999933887 | -0.282808719 | -0.698659893 | 0.415851173  | 0.004910284 |
| ENSG00000196776  | CD47       | 6.739019085  | -0.030342216 | -0.030120892 | -0.000221324 | 0.999933887 | -0.122540245 | 0.229744233  | -0.352284478 | 0.004945664 |
| ENSG00000074800  | ENO1       | 7.584134227  | -0.020785647 | -0.052975652 | 0.032190005  | 0.999933887 | -0.300560977 | -0.608818529 | 0.308257553  | 0.004946575 |
| ENSG00000104903  | LYL1       | 3.990935002  | 0.019354455  | -0.052677793 | 0.072032385  | 0.999933887 | -1.575269475 | -2.38737183  | 0.812102355  | 0.004957942 |
| ENSG00000113638  | TTC33      | 3.042753618  | -0.039524406 | 0.030252124  | -0.06977653  | 0.999933887 | 0.376347768  | 0.902533259  | -0.526185491 | 0.00495894  |
| ENSG00000080707  | SRRT       | 6.263304862  | 0.020761633  | 0.042152569  | -0.021390935 | 0.999933887 | -0.097689933 | -0.34503947  | 0.247349537  | 0.004988891 |
| ENSG00000123380  | COG8       | 0.64598216   | -0.08124276  | -0.027090226 | -0.054152535 | 0.999933887 | 0.069711273  | -0.607446735 | 0.677158008  | 0.00498895  |
| ENSG00000089916  | GPAATCH2L  | 6.783258397  | -0.035667778 | -0.05151284  | 0.015845062  | 0.999933887 | 0.342370139  | 0.623886087  | -0.281515948 | 0.00501099  |
| ENSG000000205220 | PSMB10     | 4.469337967  | 0.043623405  | 0.035179032  | 0.008444372  | 0.999933887 | -0.657672371 | -1.044847027 | 0.387174656  | 0.005021317 |
| ENSG000000250565 | ATP6V1E2   | 0.846054354  | 0.204333262  | 0.13460923   | 0.338942492  | 0.999933887 | 1.108724505  | 1.881508586  | -0.77278435  | 0.00502718  |
| ENSG000000223949 | ROR1-AS1   | -1.203378618 | 0.398380387  | 0.206633096  | 0.191747291  | 0.999933887 | 1.618015552  | 2.446288972  | -0.828273421 | 0.005034651 |
| ENSG00000213937  | CLDN9      | 1.360828733  | -0.012605435 | 0.134656573  | -0.147262009 | 0.999933887 | -1.344044502 | -2.275761333 | 0.931716832  | 0.005055411 |
| ENSG00000101337  | TM9SF4     | 6.256751411  | 0.00238706   | -0.047819395 | 0.050206455  | 0.999933887 | 0.630395769  | 0.908810459  | -0.27841469  | 0.00508912  |
| ENSG00000111596  | CNOT2      | 5.858534382  | -0.051334684 | -0.044537199 | -0.006797485 | 0.999933887 | 0.177032163  | 0.362200973  | -0.362200973 | 0.005090606 |
| ENSG00000171853  | TRAPPC12   | 4.462001277  | 0.051588132  | 0.075693626  | -0.024105494 | 0.999933887 | -0.285771865 | -0.670155245 | 0.38438338   | 0.005134543 |
| ENSG00000110057  | UNC93B1    | 6.421020481  | 0.046436902  | 0.025301735  | 0.021135167  | 0.999933887 | -1.065129749 | -1.480489186 | 0.415359437  | 0.00514807  |
| ENSG00000166920  | C15orf48   | 6.50602043   | 0.278275277  | 0.396552714  | -0.118277438 | 0.999933887 | 2.314660568  | 2.970865014  | -0.656204446 | 0.005152533 |
| ENSG00000139718  | SETD1B     | 4.840721792  | -0.030280919 | 0.097577702  | -0.127857931 | 0.999933887 | -0.776902923 | -1.182227947 | 0.405318694  | 0.005200615 |
| ENSG00000111786  | SRSF9      | 5.180880374  | 0.013910436  | 0.028053443  | -0.014143007 | 0.999933887 | -0.272762627 | -0.604899107 | 0.33213648   | 0.005200615 |
| ENSG00000242048  | AC093583.1 | -0.008556875 | 0.25594421   | 0.509314154  | -0.253369944 | 0.999933887 | 3.493669328  | 4.881390955  | -1.387721627 | 0.005202514 |
| ENSG00000196976  | LAGE3      | 2.174520282  | 0.167482042  | -0.032455655 | 0.199937697  | 0.999933887 | 0.949864622  | 1.508699022  | -0.5588344   | 0.005208077 |
| ENSG00000101044  | IDS        | 6.336953002  | 0.039686501  | -0.047712751 | 0.087581253  | 0.999933887 | -0.475901297 | -0.764969092 | 0.289094795  | 0.005208077 |
| ENSG00000182141  | ZNF708     | 4.139608638  | -0.045324515 | -0.083826364 | 0.38501849   | 0.999933887 | -0.351467609 | 0.18128536   | -0.532752969 | 0.005208077 |
| ENSG00000175895  | PLEKHF2    | 5.891265971  | -0.024245039 | -0.051368798 | 0.027123757  | 0.999933887 | 1.191822121  | 1.616971808  | -0.425149686 | 0.005208077 |
| ENSG00000100284  | TOM1       | 9.589696082  | -0.024398324 | -0.014290426 | -0.010107898 | 0.999933887 | 0.501629205  | 0.75074119   | -0.249111914 | 0.005225811 |
| ENSG00000174151  | CYB56D1    | 3.960124052  | -0.12061952  | -0.07898002  | -0.041638718 | 0.999933887 | -0.597616031 | -0.973349434 | 0.375733403  | 0.005282123 |
| ENSG00000069702  | TGFBFR3    | 4.715804446  | -0.033891681 | -0.005112945 | -0.028778737 | 0.999933887 | 0.364925695  | 0.848786971  | -0.483861276 | 0.005282123 |
| ENSG00000259668  | AC066613.1 | 2.437570041  | -0.040137432 | -0.274346903 | 0.23420947   | 0.999933887 | 2.009144258  | 0.040766815  | -1.031622557 | 0.005282898 |
| ENSG00000138069  | RAB1A      | 6.65850465   | -0.023636826 | -0.07208387  | 0.048447044  | 0.999933887 | 0.285795616  | 0.535041202  | -0.249245586 | 0.005285536 |
| ENSG00000172493  | AFF1       | 6.683264873  | -0.026585459 | -0.008480053 | -0.018105407 | 0.999933887 | -1.176661978 | -1.652167671 | 0.475505693  | 0.005288241 |
| ENSG00000226328  | NUP50-DT   | 2.95954831   | -0.002343468 | -0.001804447 | -0.000539021 | 0.999933887 | -1.126971128 | -1.698032742 | 0.571061613  | 0.005302994 |
| ENSG00000156313  | RPRGR      | 5.054752787  | -0.116947971 | -0.099300454 | -0.017647517 | 0.999933887 | 0.672142225  | 1.348900846  | -0.676758621 | 0.005307062 |
| ENSG00000109062  | SLC9A3R1   | 6.632480186  | 0.064486622  | 0.065570487  | -0.001083864 | 0.999933887 | -0.28309175  | -0.642926982 | 0.359835232  | 0.005308939 |
| ENSG00000136715  | SAP130     | 4.761810787  | 0.040341284  | 0.010917416  | 0.029429808  | 0.999933887 | -0.437181741 | -0.891045045 | 0.453863304  | 0.005308939 |
| ENSG00000187051  | RPS19BP1   | 4.884794567  | -0.038996066 | 0.011782855  | -0.050678921 | 0.999933887 | -0.498200594 | -0.876364414 | 0.37183821   | 0.005308939 |
| ENSG000000251194 | AL13330.1  | 3.281279122  | 0.018666898  | 0.017352564  | 0.001314334  | 0.999933887 | 1.427727303  | 2.252329696  | -0.824602393 | 0.005308939 |
| ENSG00000127483  | POLA2      | 7.74821026   | -0.018873262 | 0.222194233  | -0.241067494 | 0.999933887 | 0.839955881  | 1.693128695  | -0.809356814 | 0.005308939 |
| ENSG00000102921  | N4BP1      | 8.735485799  | -0.028986074 | -0.041621432 | 0.012635357  | 0.999933887 | 1.332331149  | 1.646515449  | -0.3141843   | 0.005326083 |
| ENSG00000185379  | RAD51D     | 1.624291782  | -0.015850999 | -0.071258067 | 0.055407088  | 0.999933887 | 0.408256077  | 0.954542745  | -0.546286668 | 0.005326083 |
| ENSG00000180316  | PNPLA1     | 4.765212967  | -0.063467594 | 0.063672287  | -0.124190411 | 0.999933887 | 2.059766114  | -0.480023919 | -0.480023906 | 0.00532927  |
| ENSG00000214413  | BBIP1      | 4.917252797  | -0.069823367 | 0.034097678  | -0.103921045 | 0.999933887 | 0.307657982  | 0.664464477  | -0.356806496 | 0.00533851  |
| ENSG00000127483  | HP1BP3     | 6.388703735  | 0.007512906  | 0.048964227  | -0.041451363 | 0.999933887 | -0.318180067 | -0.569134251 | 0.250954185  | 0.005394487 |
| ENSG00000146457  | WTAP       | 7.933392765  | -0.050631115 | -0.035136722 | -0.015494393 | 0.999933887 | 1.746649698  | 2.131544034  | -0.384894336 | 0.005445704 |
| ENSG00000113657  | DPYSL3     | 0.842000877  | -0.265497182 | -0.228131427 | -0.037365755 | 0.999933887 | 0.297884286  | 0.865800418  | -0.567916131 | 0.005479273 |
| ENSG00000091592  | NLRP1      | 7.560717425  | 0.024294482  | 0.052125258  | 0.002771902  | 0.999933887 | -0.081421315 | -0.291994279 | 0.210572964  | 0.005479273 |
| ENSG00000253315  | LINC01932  | 1.000142392  | 0.015737775  | 0.136530161  | -0.120792351 | 0.999933887 | 0.702911326  | 1.283046568  | -0.580135242 | 0.005479273 |
| ENSG00000088930  | XRN2       | 6.086564492  | -0.051425286 | -0.041878584 | -0.009546702 | 0.999933887 | -0.466919356 | -0.731876688 | 0.264957507  | 0.005497848 |
| ENSG00000102096  | PIM2       | 8.078718708  | 0.001125791  | -0.005720787 | 0.006846577  | 0.999933887 | 2.265407375  | 2.751990091  | -0.486582712 | 0.005497848 |
| ENSG00000154640  | BTG3       | 2.356511009  | -0.030187071 | -0.11559977  | 0.085412699  | 0.999933887 | 1.003240743  | 1.667529146  | -0.664289403 | 0.00551054  |
| ENSG00000166900  | STX3       | 9.246851234  | -0.044557061 | -0.034825861 | -0.0097312   | 0.999933887 | 0.220139424  | 0.414591919  | -0.194452495 | 0.00553225  |
| ENSG00000157191  | NECAP2     | 5.789217535  | -0.011894609 | -0.000312918 | -0.011581691 | 0.999933887 | 0.45836293   | 0.71924131   | -0.26087838  | 0.005533342 |
| ENSG00000156411  | ATP5MPL    | 4.167915537  | -0.029391496 | -0.098006263 | 0.068615367  | 0.999933887 | -0.34273701  | -0.671971341 | 0.329234331  | 0.005567498 |
| ENSG00000163735  | CXCL5      | 0.55621579   | 0.34881485   | 0.152685604  | 0.182195881  | 0.999933887 | 0.46985402   | 1.385194906  | -0.915340886 | 0.00557473  |
| ENSG00000058272  | PPP1R12A   | 7.432329378  | -0.109494313 | -0.167538337 | 0.058044924  | 0.999933887 | 0.87583261   | 1.68097194   | -0.805164583 | 0.005632858 |
| ENSG00000125912  | NCLN       | 5.482451299  | 0.046688222  | 0.02683189   | 0.019836332  | 0.999933887 | -0.097106581 | -0.406828643 | 0.309719901  | 0.005661506 |
| ENSG00000133872  | SARAF      | 8.221332769  | 0.025206086  | -0.039590122 | 0.064798208  | 0.999933887 | -0.339655099 | -0.649245259 | 0.309590161  | 0.005670121 |
| ENSG00000154767  | XPC        | 4.655192273  | -0.023746302 | -0.038454358 | 0.014708056  | 0.999933887 | -0.261022726 | -0.567704338 | 0.306681611  | 0.005676414 |
| ENSG00000130244  | FAM98C     | 3.580396406  | 0.092606895  | 0.118000995  | -0.0253941   | 0.999933887 | 0.013983647  | -0.384718591 | 0.398702239  | 0.005709642 |
| ENSG00000176390  | CRLF3      | 4.733318426  | 0.042248276  | 0.067630508  | -0.025382232 | 0.999933887 | -0.646921196 | -0.987037255 | 0.340116059  | 0.005796659 |
| ENSG00000140455  | USP3       | 5.072247854  | -0.060419862 | -0.064646145 | 0.004226822  | 0.999933887 | -0.331253    |              |              |             |

|                  |            |              |              |              |              |             |               |               |              |             |
|------------------|------------|--------------|--------------|--------------|--------------|-------------|---------------|---------------|--------------|-------------|
| ENSG000000074621 | SLC24A1    | 2.884744766  | -0.128811803 | -0.039682358 | -0.089129445 | 0.999933887 | 2.658607755   | 3.659176392   | -1.000568637 | 0.006344947 |
| ENSG00000007202  | KIAA0100   | 5.474601498  | 0.010026177  | 0.008110114  | -0.019160862 | 0.999933887 | -0.173589481  | -0.451498986  | 0.277909506  | 0.006361713 |
| ENSG000000069399 | BCL3       | 7.881679314  | 0.125306381  | 0.134548139  | -0.009241758 | 0.999933887 | 1.925062756   | 2.37272177    | -0.447659014 | 0.006372831 |
| ENSG000000103042 | SLC38A7    | 2.995340358  | 0.009747041  | 0.095443595  | -0.085696554 | 0.999933887 | 0.218942103   | 0.549492454   | -0.330550351 | 0.006375408 |
| ENSG000000272886 | DCP1A      | 5.855619853  | -0.029705772 | -0.039819823 | 0.010114051  | 0.999933887 | 0.415712134   | 0.665406204   | -0.24969407  | 0.006448897 |
| ENSG000000253372 | AC016405.1 | 3.021059484  | 0.092433168  | 0.151734304  | -0.059301136 | 0.999933887 | 1.713509559   | 2.326621798   | -0.613112239 | 0.006447994 |
| ENSG000000090060 | PAPOLA     | 7.33860248   | -0.04728022  | -0.012213238 | -0.035066892 | 0.999933887 | -0.126597492  | 0.154879372   | -0.281476864 | 0.006447994 |
| ENSG000000107882 | SUFU       | 2.275292503  | -0.011786178 | 0.086915408  | -0.098701227 | 0.999933887 | -0.016284632  | 0.577332596   | 0.561047964  | 0.006447994 |
| ENSG000000113068 | PFDN1      | 3.782800012  | -0.058923265 | -0.02215063  | -0.036772635 | 0.999933887 | 0.184847694   | 0.487496413   | -0.303008719 | 0.006477778 |
| ENSG000000198830 | HMG2       | 6.590506442  | 0.010273405  | -0.029921467 | 0.040194872  | 0.999933887 | -0.195271736  | -0.466271173  | 0.270999437  | 0.006496986 |
| ENSG000000177946 | CENPBD1    | 0.497518121  | -0.048792623 | -0.140549499 | 0.091756877  | 0.999933887 | -0.488398765  | -1.289487003  | 0.801088238  | 0.0065302   |
| ENSG000000188886 | ASTL       | 2.171631879  | 0.120680216  | 0.181303217  | -0.060623001 | 0.999933887 | 0.857349925   | 1.533352123   | -0.676002198 | 0.00654793  |
| ENSG000000129465 | RIPK3      | 3.687668293  | -0.020641767 | 0.066826483  | -0.08747025  | 0.999933887 | -0.424291035  | -0.794782666  | 0.370491831  | 0.006553929 |
| ENSG000000164086 | DUSP7      | 2.242424788  | 0.079707057  | 0.040002275  | 0.039704781  | 0.999933887 | -0.442252279  | -0.973264984  | 0.531012704  | 0.006590214 |
| ENSG000000039319 | ZFYVE16    | 8.201307998  | -0.036642853 | -0.071754875 | 0.035112022  | 0.999933887 | -0.05030401   | 0.647873602   | -0.698177612 | 0.006620652 |
| ENSG000000247982 | LINC00926  | 1.768623798  | 0.140282598  | -0.19649286  | 0.259931884  | 0.999933887 | 0.280657055   | 0.802388519   | -0.521731464 | 0.006663577 |
| ENSG000000277443 | MARCKS     | 10.588034292 | -0.050743024 | 0.006325812  | -0.057068836 | 0.999933887 | 0.91064083    | 1.275207291   | -0.364566461 | 0.006700829 |
| ENSG000000253703 | LINC00211  | 5.468515434  | 0.027517138  | -0.043373656 | 0.068854794  | 0.999933887 | 0.428366891   | 0.57362868    | -0.325995977 | 0.006741096 |
| ENSG000000152700 | SAR1B      | 3.963489258  | -0.059083323 | 0.064936384  | -0.124019707 | 0.999933887 | 0.634157938   | 1.028427128   | -0.39426919  | 0.006748846 |
| ENSG000000101544 | ADNP2      | 6.552911507  | -0.049785368 | -0.038895238 | -0.01089013  | 0.999933887 | 0.610806431   | 0.881984617   | -0.271178186 | 0.006782173 |
| ENSG000000267080 | ASB16-AS1  | 1.495934419  | 0.100179724  | -0.030623523 | 0.130803247  | 0.999933887 | -0.154324931  | -0.82595192   | 0.671626989  | 0.006782173 |
| ENSG000000198791 | CNOT7      | 4.598208731  | -0.065191945 | -0.043110503 | -0.022081442 | 0.999933887 | -0.412769357  | -0.709590916  | 0.296821559  | 0.006819588 |
| ENSG000000214106 | PAXIP1-AS2 | 1.74221589   | -0.118981792 | -0.121252789 | 0.002270997  | 0.999933887 | 0.192442822   | 0.864665147   | -0.672223236 | 0.006832012 |
| ENSG000000163412 | E1F4E3     | 5.265294779  | -0.024502009 | -0.010713307 | -0.013788703 | 0.999933887 | -0.35539035   | -0.63432577   | 0.27893542   | 0.006848499 |
| ENSG000000257354 | AC048341.1 | 1.699784257  | -0.237111503 | -0.155169062 | -0.081942441 | 0.999933887 | 0.873040515   | -0.158603686  | -0.712996371 | 0.006854837 |
| ENSG000000106123 | EPHB6      | 3.530529706  | 0.043263208  | 0.088080226  | -0.044817019 | 0.999933887 | -0.09260776   | -0.540944759  | 0.448336999  | 0.006854837 |
| ENSG000000204560 | DHX16      | 4.686322628  | 0.025036849  | 0.01708145   | 0.0079554    | 0.999933887 | -0.161776749  | -0.418173501  | 0.256396752  | 0.006854837 |
| ENSG000000144000 | SFXN5      | 3.147121299  | -0.076149705 | -0.027947486 | -0.048202219 | 0.999933887 | -0.193229946  | -0.587800113  | 0.394570167  | 0.006909551 |
| ENSG000000160305 | DIP2A      | 5.817257846  | 0.043035339  | 0.034397579  | 0.008637761  | 0.999933887 | 0.458866881   | 0.911538112   | -0.452671231 | 0.006909551 |
| ENSG000000158062 | UBXN11     | 4.33920628   | 0.014163768  | 0.045851489  | -0.031687721 | 0.999933887 | -0.030003181  | -0.337840501  | 0.30783732   | 0.006909551 |
| ENSG000000160584 | SIK3       | 6.680228321  | 0.011602072  | 0.006360971  | 0.005241101  | 0.999933887 | 0.467667737   | 0.748908931   | -0.281241194 | 0.006909551 |
| ENSG000000138449 | SLC40A1    | 3.486121028  | -0.147445441 | -0.038144701 | -0.109304739 | 0.999933887 | -0.885323251  | -1.45188929   | 0.566566038  | 0.006926248 |
| ENSG000000120742 | SERP1      | 7.314791898  | 0.050324643  | -0.003048667 | 0.05337351   | 0.999933887 | 0.464237213   | 0.720348895   | -0.256111682 | 0.007013498 |
| ENSG000000085514 | PILRA      | 8.545638083  | 0.072087313  | 0.042200261  | 0.029887052  | 0.999933887 | 1.72852057    | 2.157631989   | -0.429111149 | 0.007032458 |
| ENSG000000110711 | AIP        | 4.541860858  | 0.020898758  | 0.0083998    | 0.012498958  | 0.999933887 | -0.119883724  | -0.510772832  | 0.390789107  | 0.007043205 |
| ENSG000000145088 | EAF2       | 0.982045682  | 0.033626255  | 0.00998713   | 0.023375395  | 0.999933887 | 0.19693704    | 0.882585902   | -0.685648862 | 0.007051166 |
| ENSG000000197818 | SLC9A8     | 7.725213442  | -0.024100132 | 0.024466359  | -0.048566491 | 0.999933887 | 0.109430285   | -0.307790824  | -0.308360538 | 0.007057086 |
| ENSG000000258919 | AL049836.1 | 1.878473129  | -0.23338285  | 0.061368113  | -0.294750964 | 0.999933887 | 0.966110402   | 1.429399711   | -0.463289309 | 0.007084522 |
| ENSG000000175582 | RAB6A      | 4.658521134  | -0.017938953 | 0.012459433  | -0.030398386 | 0.999933887 | -0.442529278  | -0.791492406  | 0.348963127  | 0.007144947 |
| ENSG000000237732 | CT75       | 1.067569736  | 0.326871203  | 0.370437968  | -0.043566765 | 0.999933887 | 3.098517158   | 3.760554862   | -0.662037704 | 0.007192328 |
| ENSG000000115307 | AUP1       | 5.391924138  | -0.002282138 | 0.038077323  | -0.040354525 | 0.999933887 | 0.090390154   | -0.14948912   | 0.23987927   | 0.007225737 |
| ENSG000000163346 | PBXIP1     | 8.071159004  | 0.018397679  | 0.032486097  | -0.014063291 | 0.999933887 | -0.150090464  | -0.512718386  | 0.362627922  | 0.007244265 |
| ENSG000000133731 | MPA1       | 3.390049008  | 0.051834431  | -0.137686795 | 0.085852364  | 0.999933887 | -0.169772319  | -0.20273057   | -0.390502889 | 0.007250413 |
| ENSG000000254999 | BRK1       | 5.84704191   | 0.064009315  | -0.019108719 | 0.083118033  | 0.999933887 | 0.629275872   | 0.940793637   | -0.311517764 | 0.007252815 |
| ENSG000000116701 | NCF2       | 11.05621892  | -0.01562602  | -0.018236708 | 0.002610688  | 0.999933887 | -0.102438514  | 0.158283462   | -0.262521976 | 0.007252815 |
| ENSG000000185483 | ROR1       | -0.932285495 | -0.013569945 | 0.630553648  | -0.644123594 | 0.999933887 | 1.895819651   | -0.791633046  | 0.791633046  | 0.007252815 |
| ENSG000000179833 | SERTAD2    | 6.295920189  | -0.001014281 | -0.070903034 | 0.078078754  | 0.999933887 | 0.82606723    | 1.339529626   | -0.513462396 | 0.007252815 |
| ENSG000000197837 | H4-16      | 1.428911281  | 0.087275109  | 0.217087744  | -0.129812635 | 0.999933887 | -0.067713835  | -0.670405377  | 0.603267042  | 0.007280029 |
| ENSG000000250571 | GLI4       | 1.974715723  | -0.014462424 | 0.044077972  | -0.058540396 | 0.999933887 | -0.005822672  | -0.467228325  | 0.461405653  | 0.007280029 |
| ENSG000000075975 | MKRN2      | 4.028781084  | -0.001215932 | 0.036284121  | -0.037480053 | 0.999933887 | -0.554881418  | -0.870486006  | 0.315604589  | 0.007280029 |
| ENSG000000147416 | ATP6V1B2   | 1.061574598  | -0.076140959 | -0.064055358 | -0.009735422 | 0.999933887 | 0.215466371   | 0.492345461   | -0.27685909  | 0.007281496 |
| ENSG000000115486 | GGCX       | 3.407708285  | 0.031573035  | -0.061205202 | 0.092778237  | 0.999933887 | -0.195001762  | -0.539611429  | 0.344609668  | 0.007295388 |
| ENSG000000115306 | SPTBN1     | 7.142172345  | -0.004804384 | -0.057770385 | 0.052966001  | 0.999933887 | -0.009753102  | -0.23734287   | -0.247095972 | 0.007295388 |
| ENSG000000112659 | CUL9       | 4.849573357  | 0.054484356  | 0.058748227  | -0.004263871 | 0.999933887 | 0.207333594   | 0.483460414   | -0.276126821 | 0.007336609 |
| ENSG000000127947 | PTPN12     | 7.617749838  | -0.013053284 | -0.047316211 | 0.034262927  | 0.999933887 | 0.370199349   | 0.71470769    | -0.344508341 | 0.007335351 |
| ENSG000000067048 | DDX3Y      | 1.164642325  | 0.048116252  | 0.078064675  | -0.030948423 | 0.999933887 | 0.408752915   | 0.958617198   | -0.549864283 | 0.007357975 |
| ENSG000000026297 | RNASET2    | 7.893252123  | 0.050599568  | 0.069568919  | -0.018969351 | 0.999933887 | -0.340269927  | -0.799778813  | 0.459508886  | 0.007382221 |
| ENSG000000170892 | TSEN34     | 5.501151433  | -0.046896609 | -0.046828413 | 0.000131804  | 0.999933887 | -0.1227307582 | -0.1728692947 | 0.501385365  | 0.007416857 |
| ENSG000000111671 | SPSB2      | 1.749860455  | 0.034793305  | 0.021895294  | 0.01289801   | 0.999933887 | -0.322212775  | -0.853584438  | 0.531371573  | 0.007500167 |
| ENSG000000112610 | MRPL18     | 3.457235575  | -0.045668324 | 0.0459591678 | -0.091660002 | 0.999933887 | 0.109323114   | 1.439728846   | -0.420405733 | 0.00754233  |
| ENSG000000116337 | AMPD2      | 7.984183341  | 0.03185726   | 0.083039707  | -0.051182447 | 0.999933887 | -0.400728105  | -0.830252893  | 0.429524788  | 0.007563416 |
| ENSG000000120008 | WDR11      | 3.280279343  | -0.078466444 | -0.074039744 | -0.0046069   | 0.999933887 | 0.362658897   | 0.818372611   | -0.455713714 | 0.007653018 |
| ENSG000000138303 | ASCC1      | 2.683066665  | 0.015022489  | 0.045827804  | -0.030625315 | 0.999933887 | 0.47291858    | 0.877612843   | -0.403320986 | 0.007653018 |
| ENSG000000102580 | DNAJC3     | 7.73492038   | -0.058551561 | -0.066996207 | 0.008444646  | 0.999933887 | 0.623167815   | 1.012883588   | -0.389715773 | 0.007663374 |
| ENSG000000129625 | REEP5      | 4.68815165   | -0.015369739 | 0.0430943088 | 0.02557335   | 0.999933887 | -0.068925719  | -0.464082739  | 0.39515702   | 0.007675356 |
| ENSG000000103197 | TSC2       | 5.616914762  | 0.051372522  | 0.09892222   | -0.047549698 | 0.999933887 | -0.165759329  | -0.444242681  | 0.278483352  | 0.007684693 |
| ENSG000000069493 | CLC2D      | 5.275837277  | -0.08070252  | -0.021057853 | -0.059644667 | 0.999933887 | 0.109765046   | -0.474657342  | 0.007684693  | 0.007684693 |
| ENSG000000185722 | ANKFY1     | 5.601852858  | -0.014399458 | 0.070770167  | -0.085169625 | 0.999933887 | -0.328760717  | -0.633044376  | 0.304283659  | 0.007684693 |
| ENSG000000169891 | REP52      | 5.38951638   | -0.02983419  | -0.00514755  | -0.02486864  | 0.999933887 | 0.537120177   | 0.817268918   | -0.280148741 | 0.007698726 |
| ENSG000000180767 | CHST13     | 1.723275454  | -0.01917439  | 0.043256669  | -0.062431059 | 0.999933887 | -1.393519558  | -2.280809698  | 0.887290141  | 0.007698726 |
| ENSG000000114383 | TUSC2      | 4.560891395  |              |              |              |             |               |               |              |             |

|                  |            |              |              |              |              |             |              |               |              |             |
|------------------|------------|--------------|--------------|--------------|--------------|-------------|--------------|---------------|--------------|-------------|
| ENSG00000111913  | RIPOR2     | 8.685730181  | -0.010690329 | -0.012049778 | 0.001359449  | 0.999933887 | 0.190258877  | 0.474323939   | -0.284065063 | 0.008384176 |
| ENSG00000118689  | FOXO3      | 7.415723562  | -0.071213079 | -0.007058266 | -0.064154813 | 0.999933887 | -0.455215748 | -0.770087462  | 0.314871714  | 0.008436443 |
| ENSG00000267344  | AC003070.1 | 0.819858953  | 0.125340914  | 0.12361689   | 0.001724024  | 0.999933887 | -0.424995069 | -1.172749924  | 0.747754855  | 0.008445986 |
| ENSG00000197724  | PHF2       | 5.552758163  | 0.015954168  | 0.054487198  | -0.03853303  | 0.999933887 | -0.204575333 | -0.489490494  | 0.284915161  | 0.008475058 |
| ENSG00000137075  | RNF38      | 5.334514625  | 0.069113905  | 0.083392858  | -0.014278952 | 0.999933887 | -0.740417306 | -1.13255531   | 0.392138004  | 0.008477772 |
| ENSG00000198690  | FAN1       | 3.878633311  | 0.029439222  | 0.03671495   | -0.007275729 | 0.999933887 | -0.285490501 | -0.610817983  | 0.325327482  | 0.008477772 |
| ENSG00000163867  | ZMYM6      | 2.278822682  | -0.048520732 | -0.078308422 | 0.029787689  | 0.999933887 | -0.3568653   | 0.290111348   | -0.646976648 | 0.008488436 |
| ENSG00000164576  | SAP30L     | 3.844219984  | 0.022565829  | -0.047387652 | 0.069953482  | 0.999933887 | -0.396230067 | -0.732024485  | 0.335794418  | 0.008521696 |
| ENSG00000240057  | AC078785.1 | -1.105478127 | -0.221132418 | 0.12448819   | -0.363620608 | 0.999933887 | 0.430922284  | 1.523295352   | -1.092373068 | 0.008526681 |
| ENSG00000184091  | WDR82      | 6.89787817   | -0.054472185 | -0.03603354  | -0.018438645 | 0.999933887 | -0.527502749 | -0.805395289  | 0.277892519  | 0.008535052 |
| ENSG00000137752  | CASP1      | 7.292227293  | -0.073118065 | -0.166153155 | 0.09303509   | 0.999933887 | 1.027983393  | 1.400422697   | -0.372439303 | 0.008535052 |
| ENSG00000105732  | ZNF574     | 3.26246829   | 0.047699629  | -0.051022353 | 0.098721982  | 0.999933887 | -0.171753679 | -0.518705708  | 0.346952029  | 0.008543685 |
| ENSG00000129968  | ABHD17A    | 7.111969279  | 0.097078644  | 0.085275464  | 0.01180318   | 0.999933887 | -0.402052509 | -0.809047039  | 0.40699453   | 0.008574397 |
| ENSG00000087589  | CASS4      | 5.548015034  | -0.023578992 | 0.118452036  | -0.142031028 | 0.999933887 | -1.36212561  | -1.987303183  | 0.625177573  | 0.008581508 |
| ENSG00000105705  | SUGP1      | 3.752765879  | 0.029609197  | 0.028195013  | 0.001414184  | 0.999933887 | -0.268066994 | -0.626477605  | 0.358410611  | 0.008582344 |
| ENSG00000099622  | CIRBP      | 7.344198253  | 0.009293952  | -0.018678479 | 0.027972431  | 0.999933887 | -0.358698205 | -0.617325433  | 0.258627228  | 0.008614444 |
| ENSG00000186141  | POLR3C     | 3.129255218  | -0.071712083 | -0.123959647 | 0.052247564  | 0.999933887 | 0.984257653  | 1.660109197   | -0.675851544 | 0.008626883 |
| ENSG00000137574  | TGS1       | 3.470353178  | -0.086385404 | -0.153104433 | 0.066719029  | 0.999933887 | 0.446737108  | 0.792291122   | -0.345554014 | 0.008643361 |
| ENSG00000140379  | BCL2A1     | 9.502010607  | 0.067646164  | 0.018391678  | 0.049254486  | 0.999933887 | 1.112657558  | 1.519824694   | -0.407167136 | 0.008663522 |
| ENSG00000103381  | CPEDP1     | 7.383857608  | -0.022206055 | -0.028700114 | 0.006944059  | 0.999933887 | -0.797530593 | -1.235235777  | 0.537705184  | 0.008682849 |
| ENSG00000197283  | SYNGAP1    | 3.433721363  | 0.054618727  | 0.022598673  | 0.032020053  | 0.999933887 | 0.554118236  | 1.012174742   | -0.458056506 | 0.008758927 |
| ENSG00000112851  | ERBIN      | 8.867037715  | -0.059411405 | -0.113003686 | 0.053592281  | 0.999933887 | 0.280364547  | -0.640454747  | 0.008758927  | 0.008758927 |
| ENSG00000153936  | HS2ST1     | 3.51864175   | -0.073638513 | 0.024600588  | -0.098239101 | 0.999933887 | -0.361557913 | 0.0930506     | -0.454608513 | 0.008791191 |
| ENSG00000112149  | CD83       | 10.188261769 | 0.065820514  | 0.008129367  | 0.057691147  | 0.999933887 | 1.28479596   | 1.645788295   | -0.360992335 | 0.008821656 |
| ENSG00000114895  | EIF2A      | 3.932884115  | -0.036175946 | -0.09252491  | 0.056348964  | 0.999933887 | 0.143724542  | -0.465548796  | -0.321824255 | 0.008821656 |
| ENSG00000108061  | SHOC2      | 6.82873088   | -0.044717839 | -0.039424798 | -0.005293041 | 0.999933887 | -0.232896546 | 0.169893342   | -0.402790388 | 0.008821656 |
| ENSG000000015133 | CCDC89C    | 6.049497525  | 0.025536269  | 0.080039596  | -0.054503327 | 0.999933887 | -0.102276724 | -0.230344024  | 0.230163516  | 0.008821656 |
| ENSG00000196544  | BORCS6     | 1.586806373  | 0.053862687  | 0.045777657  | 0.00808503   | 0.999933887 | -0.498062414 | -1.1454372366 | 0.647300952  | 0.008821656 |
| ENSG00000123815  | COQ8B      | 4.074778103  | 0.021585558  | 0.076854979  | -0.055269421 | 0.999933887 | -0.071429719 | -0.40465537   | 0.333215821  | 0.008821656 |
| ENSG00000180398  | MCFD2      | 4.230836099  | 0.019559114  | 0.028920252  | -0.009361138 | 0.999933887 | 0.433165359  | 0.747074417   | -0.313909058 | 0.008821656 |
| ENSG00000145901  | TNIP1      | 9.417293046  | -0.01592676  | -0.01999094  | 0.004064238  | 0.999933887 | 1.564320029  | 1.959873311   | -0.395553282 | 0.008821656 |
| ENSG00000172053  | QARS1      | 4.834482721  | 0.004963553  | -0.018015692 | 0.023012045  | 0.999933887 | 0.045931339  | -0.227504647  | 0.273435986  | 0.008860491 |
| ENSG00000109320  | NFKB1      | 8.123360281  | -0.052092572 | 0.000575656  | -0.052688228 | 0.999933887 | 2.135915491  | 2.602510778   | -0.466595287 | 0.008890492 |
| ENSG00000260279  | AC17932.1  | 3.19618909   | -0.102602773 | -0.076685242 | -0.025917531 | 0.999933887 | -0.366181806 | -0.818728769  | 0.452546963  | 0.008895359 |
| ENSG00000172724  | CCL19      | -2.234237295 | 0.034191327  | 0.203420777  | -0.169229451 | 0.999933887 | 1.591513298  | 3.180011971   | -1.588498672 | 0.008895359 |
| ENSG00000009314  | VNN3       | 6.520946651  | -0.080894637 | -0.108275103 | 0.027380466  | 0.999933887 | 0.389035417  | 0.788922221   | -0.399868605 | 0.008907669 |
| ENSG00000063244  | UZAF2      | 6.950063277  | 0.029493899  | 0.041455657  | -0.011961759 | 0.999933887 | -0.289845887 | -0.550767859  | 0.260921972  | 0.008928526 |
| ENSG00000110925  | CSRNP2     | 3.550893026  | 0.015878059  | 0.08850649   | -0.072628431 | 0.999933887 | 0.546140224  | 0.972949395   | -0.42680917  | 0.008964674 |
| ENSG00000196411  | EPHB4      | 2.842045315  | 0.023721696  | 0.019943046  | 0.003778651  | 0.999933887 | -0.110639994 | -0.699281402  | 0.588641408  | 0.008967352 |
| ENSG00000024128  | CRCP       | 3.876769748  | -0.086550222 | -0.003539725 | -0.083015297 | 0.999933887 | -0.194022562 | -0.557695036  | 0.363672474  | 0.008970024 |
| ENSG00000138073  | PREB       | 3.542669637  | 0.010939317  | 0.03501886   | -0.024079542 | 0.999933887 | -0.172041623 | -0.486477305  | 0.314435682  | 0.009005826 |
| ENSG00000066697  | MSANTD3    | 1.582945023  | -0.157287979 | -0.056899737 | -0.100388242 | 0.999933887 | 1.603539138  | 2.266420058   | -0.66288092  | 0.009015869 |
| ENSG00000184602  | SNN        | 8.934781355  | -0.023253671 | -0.083237111 | 0.06007004   | 0.999933887 | 0.83123069   | 1.175244419   | -0.344013729 | 0.009017292 |
| ENSG00000164691  | TAGAP      | 9.850612271  | 0.143195625  | 0.114807415  | 0.02838821   | 0.999933887 | 1.761879135  | 2.236951365   | -0.475072229 | 0.009058621 |
| ENSG00000089057  | SLC23A2    | 6.329707518  | -0.098653133 | -0.047446687 | -0.051206446 | 0.999933887 | -1.094861131 | -1.405046343  | 0.311085231  | 0.009061111 |
| ENSG00000083937  | CHMP2B     | 7.4021111048 | -0.018762642 | -0.145378767 | 0.126616124  | 0.999933887 | 0.222524808  | 0.540164684   | -0.317640036 | 0.009074981 |
| ENSG00000108312  | UBTF       | 5.342946152  | 0.01437657   | 0.043977123  | -0.029600553 | 0.999933887 | -0.090624339 | -0.358642992  | 0.268018653  | 0.009074981 |
| ENSG00000090316  | MAEA       | 7.771152537  | 0.003000138  | -0.049523683 | 0.052523683  | 0.999933887 | 0.463651358  | 0.709301277   | -0.245650369 | 0.009133618 |
| ENSG00000168175  | MAPK1IP1L  | 6.489435749  | -0.042010296 | -0.019640576 | -0.022369721 | 0.999933887 | 0.170908961  | 0.394934502   | -0.22402554  | 0.009195328 |
| ENSG00000090600  | FKBP5      | 5.063923616  | 0.009505567  | -0.024003858 | 0.033509425  | 0.999933887 | 0.42109077   | 0.857416008   | -0.436325238 | 0.009195328 |
| ENSG00000182676  | PPP1R27    | 0.657344415  | 0.025614549  | 0.329162542  | -0.071547994 | 0.999933887 | 1.630097755  | 2.605551107   | -0.975553352 | 0.009202286 |
| ENSG00000121749  | TBC1D15    | 6.885800741  | -0.074316788 | -0.081202211 | 0.006885423  | 0.999933887 | -0.07454639  | 0.387762623   | -0.462308913 | 0.009228434 |
| ENSG00000198818  | SFT2D1     | 5.545389777  | -0.001707519 | 0.007279126  | -0.008986644 | 0.999933887 | 0.278317621  | 0.514375997   | -0.236058375 | 0.009253392 |
| ENSG00000049249  | TNFRSF9    | 3.321266406  | 0.040620289  | -0.08480377  | 0.125424059  | 0.999933887 | 1.173616968  | 1.669775228   | -0.49615826  | 0.009264876 |
| ENSG000000232912 | REER-AS1   | 0.073829276  | 0.058165456  | -0.097011972 | 0.155177428  | 0.999933887 | -0.772210625 | -1.712912415  | 0.940701521  | 0.009275755 |
| ENSG00000078369  | GNB1       | 8.965924571  | 0.015812432  | 0.007175598  | 0.008656445  | 0.999933887 | 0.34639291   | 0.568311968   | -0.221919058 | 0.009341579 |
| ENSG00000197548  | ATG7       | 6.633400633  | 0.036268487  | 0.094143831  | -0.057875344 | 0.999933887 | 1.452725447  | 1.80803993    | -0.355314483 | 0.009398771 |
| ENSG00000176542  | USF3       | 7.836563386  | -0.049044488 | -0.086995249 | 0.037950761  | 0.999933887 | 0.666176245  | -0.197490602  | -0.531322816 | 0.009402896 |
| ENSG00000103222  | ABCC1      | 6.02604141   | 0.032594555  | 0.037043395  | -0.004448841 | 0.999933887 | 0.713192601  | 1.039850184   | -0.326657583 | 0.009406642 |
| ENSG00000166164  | BRD7       | 4.193765859  | -0.01204484  | -0.078326298 | 0.066281458  | 0.999933887 | -0.153738624 | -0.463833156  | 0.310094531  | 0.009406642 |
| ENSG00000089818  | NECAP1     | 7.677512757  | -0.000935435 | 0.022632537  | -0.023567972 | 0.999933887 | 0.905468036  | 1.209450868   | -0.303982831 | 0.009406642 |
| ENSG00000144824  | PHLDB2     | 1.021912735  | -0.134666313 | -0.00339066  | -0.131275673 | 0.999933887 | -0.198426138 | 0.574878096   | -0.773302423 | 0.009414184 |
| ENSG00000226137  | BAIAP2-DT  | 1.071123398  | 0.079335706  | 0.130505161  | -0.051215355 | 0.999933887 | -0.752480221 | -1.64244499   | 0.889964769  | 0.009482901 |
| ENSG00000143851  | PTPN7      | 5.978877678  | 0.005731372  | -0.003760213 | 0.009491584  | 0.999933887 | -0.278638068 | -0.520342213  | 0.241704145  | 0.009482901 |
| ENSG000002013073 | CHP1P2     | 5.514519925  | 0.006988579  | 0.027512921  | -0.020524342 | 0.999933887 | -0.043870424 | -0.27393995   | -0.27393995  | 0.009494612 |
| ENSG00000157020  | SEC13      | 5.281488213  | 0.026031187  | -0.007305728 | 0.033336915  | 0.999933887 | 0.921007004  | 1.210820858   | -0.289813854 | 0.00949591  |
| ENSG00000140553  | UNC45A     | 3.843271187  | -0.066109764 | 0.012404157  | -0.078513921 | 0.999933887 | -0.403809327 | -0.748808291  | 0.344998964  | 0.009504065 |
| ENSG00000133703  | KRAS       | 5.461825027  | -0.032985494 | -0.023658962 | -0.009326532 | 0.999933887 | 0.238819641  | 0.578703356   | -0.339883715 | 0.009570827 |
| ENSG00000229314  | ORM1       | 6.265369327  | -0.083518107 | -0.0129869   | -0.070531207 | 0.999933887 | 1.906484722  | 2.454878383   | -0.54839366  | 0.009583212 |
| ENSG00000107679  | PLEKHA1    | 3.111521934  | -0.06132005  | -0.098659563 | 0.037339513  | 0.999933887 | -0.13251171  | -0.402761548  | 0.009654826  | 0.009654826 |
| ENSG00000124391  | IL7LC      | -0.923840129 | -0.263117486 | 0.091984826  | -0.355102313 | 0.999933887 | 2.199        |               |              |             |

|                  |            |              |              |              |               |             |              |              |              |             |
|------------------|------------|--------------|--------------|--------------|---------------|-------------|--------------|--------------|--------------|-------------|
| ENSG000000251136 | AF117829.1 | 3.511940203  | 0.10538667   | 0.185128174  | -0.079741504  | 0.999933887 | 1.834988462  | 2.363214407  | -0.528225946 | 0.01050666  |
| ENSG000000131504 | DIAPH1     | 7.842246107  | -0.028113308 | -0.01402163  | -0.014091678  | 0.999933887 | -0.412681204 | -0.648918313 | 0.236237109  | 0.010509856 |
| ENSG000000145860 | RNF145     | 7.240198162  | -0.02325847  | -0.00711028  | -0.01614819   | 0.999933887 | 0.00213308   | 0.212190768  | 0.210057889  | 0.010509856 |
| ENSG000000197442 | MAP3K5     | 5.858460184  | -0.011324201 | -0.027934916 | 0.016610715   | 0.999933887 | 0.709733419  | 1.118590911  | -0.408857492 | 0.010509856 |
| ENSG000000158161 | EYA3       | 5.18218039   | -0.032539437 | -0.11595749  | 0.083418053   | 0.999933887 | 1.047202629  | 1.505236559  | -0.45803393  | 0.010524484 |
| ENSG000000163348 | PYGO2      | 3.671006864  | -0.051331624 | -0.059485585 | 0.008153961   | 0.999933887 | -0.056798566 | -0.350647826 | 0.29384926   | 0.010541794 |
| ENSG000000101160 | CTS2       | 6.369313139  | 0.064040072  | 0.080247127  | -0.016207055  | 0.999933887 | -0.571192573 | -1.058611308 | 0.487418736  | 0.010541794 |
| ENSG000000152503 | TRIM36     | -0.328209948 | -0.077627758 | 0.287528113  | -0.365155871  | 0.999933887 | 1.381463354  | 2.314578902  | -0.933115549 | 0.010541794 |
| ENSG000000185650 | ZFP36L1    | 10.227713044 | 0.158110291  | 0.27203099   | -0.113920699  | 0.999933887 | -0.051854803 | 0.213379747  | -0.26523455  | 0.010563592 |
| ENSG000000213281 | NRAS       | 5.33815715   | -0.055862738 | -0.062162689 | 0.006299951   | 0.999933887 | -0.134181905 | 0.122195606  | -0.256377511 | 0.010563592 |
| ENSG000000181790 | ADGRB1     | 2.663837468  | 0.206042661  | -0.012829977 | 0.218872638   | 0.999933887 | 1.110438731  | 1.545072711  | -0.43463398  | 0.010563592 |
| ENSG000000185049 | NELFA      | 3.177133043  | 0.060862976  | 0.020056231  | 0.040806745   | 0.999933887 | -0.002577353 | -0.354905388 | 0.352328035  | 0.010563592 |
| ENSG000000177105 | RHOQ       | 8.561865451  | 0.020831145  | -0.016672371 | 0.037503516   | 0.999933887 | 0.624062492  | 0.943118165  | -0.319055672 | 0.010617206 |
| ENSG000000115762 | PLEKH2     | 8.825658248  | -0.077090917 | -0.02254532  | -0.054545597  | 0.999933887 | 0.661424032  | 0.90188612   | -0.240462087 | 0.010632742 |
| ENSG000000240065 | PSMB9      | 6.759828514  | 0.07329268   | -0.002422189 | 0.075714869   | 0.999933887 | -0.275809712 | -0.573482424 | 0.297672712  | 0.010632742 |
| ENSG000000058889 | ZFX        | 6.097715613  | -0.072119743 | -0.058206689 | -0.019290953  | 0.999933887 | -0.102311731 | 0.288264034  | -0.370575766 | 0.010632742 |
| ENSG000000125430 | HS3ST3B1   | 4.056506548  | 0.041534981  | 0.071983571  | -0.03044859   | 0.999933887 | 1.557413477  | 2.442758688  | -0.885345211 | 0.010632742 |
| ENSG000000167642 | SPINT2     | 3.587580123  | 0.066144615  | 0.070899075  | -0.00475446   | 0.999933887 | 0.727382751  | 1.1470689414 | -0.147688663 | 0.010688145 |
| ENSG000000113575 | PPP2CA     | 6.793789624  | -0.025398411 | -0.059779993 | 0.034381583   | 0.999933887 | 0.082997606  | 0.2831465    | -0.200148894 | 0.010760612 |
| ENSG000000237765 | FAM200B    | 5.135756596  | 0.029675396  | 0.121716292  | -0.092040896  | 0.999933887 | 0.109943254  | 0.448373787  | -0.338430534 | 0.010799218 |
| ENSG000000171490 | RSL1D1     | 4.470106222  | -0.036120295 | -0.144780274 | 0.108659979   | 0.999933887 | 0.268775929  | 0.563937984  | -0.295162055 | 0.010807398 |
| ENSG000000090924 | PLEKHG2    | 5.728202768  | 0.137574351  | 0.072999346  | 0.064575004   | 0.999933887 | 0.573412475  | 0.897490486  | -0.324078011 | 0.010832781 |
| ENSG000000126883 | NUP214     | 6.1818606    | -0.028549281 | 0.021537208  | -0.050086489  | 0.999933887 | -0.447257297 | -0.764967384 | 0.317710087  | 0.010861629 |
| ENSG000000160791 | CCR5       | 3.190033322  | -0.007802735 | -0.030219511 | 0.022416776   | 0.999933887 | 0.383318144  | 0.721141981  | -0.337823837 | 0.010946562 |
| ENSG000000112242 | E2F3       | 6.98068466   | -0.073683169 | -0.059241002 | -0.014442167  | 0.999933887 | 0.007584752  | -0.23040732  | -0.23040732  | 0.010954779 |
| ENSG000000143878 | RHOB       | 6.048418309  | 0.117438298  | 0.087354419  | 0.030083879   | 0.999933887 | -0.475420707 | -0.991000708 | 0.515580001  | 0.010997122 |
| ENSG000000153291 | SLC25A27   | 1.941049561  | -0.062693327 | -0.157886435 | 0.095193108   | 0.999933887 | 0.243143129  | 0.683686891  | -0.440543772 | 0.010997122 |
| ENSG000000185753 | Cxorf38    | 4.915304069  | -0.086399895 | -0.031077622 | -0.056322273  | 0.999933887 | -0.746023256 | -1.111652666 | 0.36562941   | 0.011009003 |
| ENSG000000139645 | ANKRD52    | 4.376852408  | 0.029742661  | -0.038055362 | 0.067797965   | 0.999933887 | -0.121205068 | -0.394055309 | 0.272850241  | 0.011009003 |
| ENSG000000128335 | APOL2      | 6.351305992  | -0.023231552 | -0.040004792 | 0.016773239   | 0.999933887 | -0.759563268 | -1.074906867 | 0.315343599  | 0.011071997 |
| ENSG000000130305 | NSUN5      | 3.237321084  | 0.022182889  | -0.106924196 | 0.129107085   | 0.999933887 | -0.293165105 | -0.671021667 | 0.377856562  | 0.011074296 |
| ENSG000000143390 | RFX5       | 4.640711344  | 0.00883039   | 0.012053425  | -0.003223036  | 0.999933887 | 0.605288565  | 0.942140271  | -0.336851706 | 0.011104238 |
| ENSG000000173171 | MTX1       | 3.917368937  | -0.058354905 | -0.059166409 | 0.000811504   | 0.999933887 | -0.783360805 | -1.252815606 | 0.469454801  | 0.011149479 |
| ENSG000000170035 | UBE2E3     | 3.908368844  | -0.05525784  | -0.020217478 | -0.0035040363 | 0.999933887 | -0.295338707 | -0.636028204 | 0.34068204   | 0.011149825 |
| ENSG000000102125 | TAZ        | 4.775007872  | 0.022242218  | 0.04563642   | -0.023394241  | 0.999933887 | -0.183394325 | -0.469043099 | 0.285648774  | 0.011149825 |
| ENSG000000148516 | ZEB1       | 5.856201958  | -0.045590037 | -0.025684079 | -0.019905958  | 0.999933887 | -0.514545561 | 0.087885488  | -0.602431048 | 0.011151931 |
| ENSG000000172578 | KLHL6      | 7.012129582  | -0.032206794 | -0.063599164 | 0.03139237    | 0.999933887 | -0.175123658 | -0.07533749  | -0.250461148 | 0.011153532 |
| ENSG000000076053 | RBMT       | 4.310456205  | -0.00887466  | 0.032067019  | -0.040941679  | 0.999933887 | 0.055396993  | 0.341338199  | -0.285941207 | 0.011199192 |
| ENSG000000113595 | TRIM23     | 3.685239511  | -0.027321072 | -0.178534929 | 0.151213857   | 0.999933887 | -0.338639944 | -0.17149439  | -0.456134334 | 0.01121816  |
| ENSG000000184831 | APOO       | 0.156078099  | 0.008194999  | 0.120595964  | -0.112400695  | 0.999933887 | 0.422874392  | 1.400346424  | -0.977472032 | 0.011242017 |
| ENSG000000084110 | HAL        | 5.695709864  | -0.030051023 | 0.019022067  | -0.04907309   | 0.999933887 | -0.50368555  | -0.77137375  | 0.26769198   | 0.01125493  |
| ENSG000000149187 | CELF1      | 7.327662126  | -0.060125646 | 0.000134557  | -0.060260203  | 0.999933887 | 0.608466972  | 0.920380812  | -0.31191384  | 0.011258303 |
| ENSG000000156127 | BATF       | 3.396478853  | 0.051996095  | 0.038844835  | 0.01315126    | 0.999933887 | 0.541433306  | 1.0393963    | -0.497962994 | 0.01128075  |
| ENSG000000115590 | IL1R2      | 7.753039878  | 0.043217129  | 0.018033767  | 0.025183362   | 0.999933887 | 0.780421163  | 1.065272306  | -0.284851143 | 0.011352128 |
| ENSG000000150961 | SEC24D     | 4.44030428   | -0.01869759  | -0.019608249 | 0.000910658   | 0.999933887 | -0.416295045 | -0.729255341 | 0.312960297  | 0.011367767 |
| ENSG000000110330 | BIRC2      | 6.057995984  | -0.010533721 | -0.06241607  | 0.051882349   | 0.999933887 | 0.673331849  | 1.033310622  | -0.359978773 | 0.011376317 |
| ENSG000000152484 | USP12      | 4.168754619  | -0.051422108 | -0.067100269 | 0.015687161   | 0.999933887 | 0.452887055  | 0.827403671  | -0.374516617 | 0.01140366  |
| ENSG000000234191 | LINC01283  | -1.860567304 | -0.131239876 | -0.377429623 | 0.246189746   | 0.999933887 | 0.988421698  | 0.675927248  | 0.18750555   | 0.01140366  |
| ENSG000000263847 | AP005899.1 | 0.166121991  | -0.103884757 | 0.294984807  | -0.398869564  | 0.999933887 | 0.479986905  | 1.286430532  | -0.806443627 | 0.011406925 |
| ENSG000000144711 | QSEC1      | 9.045221391  | -0.003316012 | -0.034737339 | 0.034157725   | 0.999933887 | 0.310579568  | 0.492637418  | -0.182057851 | 0.011531948 |
| ENSG000000105352 | CEACAM4    | 3.518691199  | 0.035218863  | 0.030707397  | 0.031511465   | 0.999933887 | -0.218814357 | -0.851654318 | 0.632839781  | 0.011554888 |
| ENSG000000139629 | GALNT6     | 3.066037494  | 0.013376745  | 0.108963584  | -0.095586839  | 0.999933887 | 0.202425564  | 0.513430819  | -0.311005255 | 0.011556622 |
| ENSG000000131323 | TRAF3      | 7.463181198  | -0.052816301 | -0.045652897 | -0.007163403  | 0.999933887 | 0.634785433  | 0.893471738  | -0.258956305 | 0.011556807 |
| ENSG000000272079 | AC004233.2 | 1.339885517  | 0.019292209  | 0.062170771  | -0.042878562  | 0.999933887 | -1.315140047 | -2.101058578 | 0.785918531  | 0.011576407 |
| ENSG000000197632 | SERPINB2   | 5.538252544  | 0.143361014  | 0.198751284  | -0.05539027   | 0.999933887 | 0.877009034  | 0.178094885  | -0.530885851 | 0.011709949 |
| ENSG000000146205 | ANO7       | -2.348720182 | -0.019785324 | 0.465266785  | -0.485052109  | 0.999933887 | 0.875806674  | 0.924822962  | -1.800629636 | 0.011709949 |
| ENSG000000172977 | KAT5       | 4.726366166  | 0.000621441  | 0.03773906   | -0.037117619  | 0.999933887 | 0.159889125  | 0.407412697  | -0.247523572 | 0.011709949 |
| ENSG000000075651 | PLD1       | 4.008056231  | -0.010642916 | -0.023742894 | 0.013099978   | 0.999933887 | 2.862398065  | 3.656083757  | -0.793145692 | 0.011722331 |
| ENSG000000101190 | TCFL5      | 3.844685828  | 0.117050929  | 0.075560403  | 0.041486926   | 0.999933887 | 3.325746097  | 0.611249057  | -0.685502959 | 0.011722647 |
| ENSG000000173575 | CHD2       | 9.155684257  | -0.087246768 | -0.061866589 | -0.025380178  | 0.999933887 | 0.58640516   | 0.909698626  | -0.323293467 | 0.011737192 |
| ENSG000000273812 | BX640514.2 | 3.673831059  | 0.183881758  | 0.266708982  | -0.082827223  | 0.999933887 | 1.345592779  | 1.875113966  | -0.529521188 | 0.011750009 |
| ENSG000000256771 | ZNF253     | 0.101054558  | 0.127940137  | -0.12304191  | 0.250982048   | 0.999933887 | -0.383632841 | 0.299534375  | -0.683167216 | 0.011792753 |
| ENSG000000138413 | IDH1       | 1.690641087  | -0.060699693 | 0.031933731  | -0.029633424  | 0.999933887 | -0.376482319 | 0.841612536  | 0.465130217  | 0.011797255 |
| ENSG000000042445 | RETSA1     | 3.093894669  | -0.028548546 | 0.088169596  | -0.116718142  | 0.999933887 | -0.065055047 | -0.403469624 | 0.365414577  | 0.011797255 |
| ENSG000000008276 | DLEC1      | 3.238949677  | -0.089540199 | 0.0211738152 | -0.111278351  | 0.999933887 | 0.836721362  | 1.57535356   | -0.738631994 | 0.011862587 |
| ENSG000000178385 | PLEKHM3    | 5.823228419  | 0.075183411  | 0.089173644  | -0.013990233  | 0.999933887 | 1.496096554  | 1.924641359  | -0.428544785 | 0.011887427 |
| ENSG000000204852 | TCN1       | 2.13737168   | -0.107884891 | -0.019194182 | -0.08869071   | 0.999933887 | -0.692186726 | -1.250062032 | 0.557875327  | 0.011909977 |
| ENSG000000233578 | E1F4EP1    | 3.168272062  | -0.020807394 | 0.098122156  | -0.11892955   | 0.999933887 | -0.139265927 | 0.455845357  | -0.595111284 | 0.011917758 |
| ENSG000000133059 | DSTYK      | 3.602250813  | 0.028138586  | -0.006084825 | 0.034223411   | 0.999933887 | -0.494435267 | -0.959232194 | 0.464796927  | 0.011931489 |
| ENSG000000151715 | TMEM45B    | 2.51879103   | 0.023122651  | 0.033327269  | -0.010204618  | 0.999933887 | -0.809321269 | -1.351506015 | 0.542184746  | 0.01195218  |
| ENSG000000147894 | C9orf72    | 8.228645741  | -0.079204303 |              |               |             |              |              |              |             |

|                  |            |              |              |              |              |             |              |              |               |             |
|------------------|------------|--------------|--------------|--------------|--------------|-------------|--------------|--------------|---------------|-------------|
| ENSG00000105825  | TFPI2      | -1.82698997  | -0.198870711 | 0.081314654  | -0.280185365 | 0.999933887 | 0.815095839  | 1.743640737  | -0.928544898  | 0.012831371 |
| ENSG00000116525  | TRIM62     | 3.631261264  | 0.141556324  | 0.080426244  | 0.06113008   | 0.999933887 | -0.316363662 | -0.664986702 | 0.34862304    | 0.012900138 |
| ENSG00000186431  | FCAR       | 8.125259563  | 0.157449278  | 0.136168643  | 0.021280635  | 0.999933887 | 1.82801463   | 2.226175811  | -0.398161181  | 0.012900138 |
| ENSG00000185112  | FAM43A     | 1.714431669  | -0.061971234 | -0.05237038  | -0.009600854 | 0.999933887 | -0.069812518 | -0.544380571 | 0.474568053   | 0.012919341 |
| ENSG00000110436  | SLC1A2     | -0.610501627 | 0.025844316  | 0.469128589  | -0.443324273 | 0.999933887 | 0.498128198  | 1.6035353    | -1.105407102  | 0.013040327 |
| ENSG00000148356  | LRSAM1     | 3.905584776  | -0.026697711 | 0.10499416   | -0.131691871 | 0.999933887 | -0.13452494  | -0.485654377 | 0.351120437   | 0.013050847 |
| ENSG00000225422  | RBMS1P1    | 1.967570959  | -0.109990479 | -0.176211863 | 0.066221384  | 0.999933887 | 1.51825241   | 2.191621258  | -0.67368818   | 0.013073263 |
| ENSG00000151689  | INPP1      | 2.618727644  | -0.053626484 | -0.063140363 | 0.009511879  | 0.999933887 | -0.06118912  | 0.29969403   | -0.36008315   | 0.013119632 |
| ENSG00000143149  | ALDH9A1    | 3.858763117  | -0.129485151 | 0.072154846  | -0.201639996 | 0.969206975 | -0.390335497 | -0.688060519 | 0.298271021   | 0.013241847 |
| ENSG00000111802  | TDP2       | 8.224673971  | -0.034839047 | -0.101299432 | 0.066460384  | 0.999933887 | 0.06272639   | -0.302388638 | -0.239662247  | 0.013248345 |
| ENSG00000163519  | TRAT1      | 3.600766461  | -0.05711455  | -0.156843984 | 0.099729434  | 0.999933887 | -0.017975896 | 0.441237722  | -0.459213619  | 0.013248345 |
| ENSG00000139190  | VAMP1      | 4.865581627  | 0.012092209  | -0.03882217  | 0.050914379  | 0.999933887 | -0.141649874 | -0.439095165 | 0.297445291   | 0.013254284 |
| ENSG00000103611  | FUZ        | 3.109482473  | 0.059110494  | -0.053564727 | 0.112675221  | 0.999933887 | -0.290151694 | -0.717195444 | 0.427043749   | 0.013510771 |
| ENSG00000171467  | ZNF318     | 5.448708698  | 0.019378325  | -0.104715805 | 0.12409413   | 0.999933887 | 0.358033471  | 0.646776074  | -0.288742603  | 0.013534104 |
| ENSG00000205208  | C4orf46    | 2.301216159  | -0.12156041  | -0.103145916 | -0.018414494 | 0.999933887 | -0.051112871 | -0.376669152 | -0.427782023  | 0.013555936 |
| ENSG00000176101  | SSNA1      | 4.178158686  | 0.111742571  | 0.080319349  | 0.031423223  | 0.999933887 | -0.233473815 | -0.607981136 | 0.374507321   | 0.013555936 |
| ENSG00000168528  | SERINC2    | 1.185925047  | -0.015113147 | -0.123136798 | 0.108023651  | 0.999933887 | -0.377488068 | 0.017266953  | -0.394755021  | 0.013559372 |
| ENSG00000100898  | ABI3       | 4.28440785   | 0.042817407  | 0.039928519  | 0.002888888  | 0.999933887 | -0.211565507 | -0.53977114  | 0.328205892   | 0.013563059 |
| ENSG00000165997  | ARL5B      | 7.614909991  | 0.11578085   | -0.036761365 | 0.152542215  | 0.999933887 | 1.620074593  | 2.219936846  | -0.599862253  | 0.013574174 |
| ENSG00000203644  | AC083799.1 | 4.866542407  | -0.088546309 | -0.110623117 | 0.022077008  | 0.999933887 | -0.043355902 | 0.238575944  | -0.281931845  | 0.013575728 |
| ENSG00000214194  | SMIM30     | 0.008631567  | -0.047772845 | -0.278872805 | 0.23109996   | 0.999933887 | -0.003152548 | 0.855045822  | -0.85819837   | 0.013600005 |
| ENSG00000173846  | PLK3       | 8.676020753  | 0.187103647  | 0.094618976  | 0.092484672  | 0.999933887 | 1.84232184   | 2.268848973  | -0.426527134  | 0.013666711 |
| ENSG00000183513  | COA5       | 3.080959882  | -0.023887789 | -0.230872137 | 0.206984348  | 0.999933887 | -0.295419809 | -0.608113333 | 0.312693524   | 0.013716153 |
| ENSG00000101386  | CSNK2A1    | 4.22192711   | -0.055050817 | 0.000551998  | -0.055602815 | 0.999933887 | -0.2914478   | -0.574945191 | 0.283497341   | 0.013770704 |
| ENSG00000102495  | COX17      | 3.798060225  | -0.008113505 | -0.033525796 | 0.025415232  | 0.999933887 | 0.671133903  | 0.936164405  | -0.265035052  | 0.013770704 |
| ENSG00000166716  | ZNF592     | 6.431577473  | -0.004139076 | -0.002162699 | -0.001976377 | 0.999933887 | -0.548080853 | -0.784711919 | 0.236631066   | 0.013770704 |
| ENSG00000149679  | CABLES2    | 3.479721356  | 0.028012312  | 0.022101308  | 0.005911004  | 0.999933887 | 0.504382016  | 0.862741485  | -0.358359468  | 0.013851156 |
| ENSG00000142347  | MYO1F      | 10.339761823 | -0.011919759 | 0.020869143  | -0.032789802 | 0.999933887 | -0.732455661 | -1.048125121 | 0.315664961   | 0.013891473 |
| ENSG00000091972  | CD200      | -0.025862591 | 0.122285212  | -0.415687584 | 0.627972796  | 0.999933887 | 1.907100073  | 2.744888724  | -0.837787201  | 0.013933931 |
| ENSG00000114904  | NEK4       | 1.560331549  | 0.030464031  | -0.07362812  | 0.104092151  | 0.999933887 | 0.279077899  | 0.763116694  | -0.484038795  | 0.013933931 |
| ENSG000000077150 | NFKB2      | 9.661266513  | 0.0569005    | 0.119924853  | -0.063024353 | 0.999933887 | 2.142827091  | 2.524923529  | -0.382096438  | 0.013938749 |
| ENSG00000100439  | ABHD4      | 6.294281111  | -0.050560512 | -0.018673714 | 0.013608702  | 0.999933887 | 0.305518615  | -0.251511191 | 0.014001786   | 0.013938749 |
| ENSG00000090863  | GLG1       | 6.171215998  | -0.022471069 | -0.060152496 | 0.037681397  | 0.999933887 | -0.181495332 | -0.406223598 | 0.224728266   | 0.014039157 |
| ENSG00000105835  | NAMPT      | 12.55791678  | -0.012940281 | -0.070751979 | 0.057811699  | 0.999933887 | 0.352709477  | 0.658821444  | -0.306112967  | 0.014085244 |
| ENSG00000099942  | CRKL       | 5.746057521  | -0.118666986 | -0.032895113 | -0.085771872 | 0.999933887 | -0.512913172 | -0.790977943 | 0.278064771   | 0.014088054 |
| ENSG00000164609  | SLU7       | 6.647631096  | -0.061002597 | -0.095386246 | 0.034383649  | 0.999933887 | 0.004973742  | 0.29442794   | -0.289454198  | 0.014088054 |
| ENSG00000155961  | RAB39B     | 2.917917255  | -0.041521502 | -0.09986885  | 0.058347348  | 0.999933887 | 0.407896818  | 0.834561771  | -0.426664954  | 0.014156326 |
| ENSG00000135679  | MDM2       | 6.095659033  | -0.024178395 | 0.046473336  | -0.070651731 | 0.999933887 | 0.269246703  | 0.617810098  | -0.348563395  | 0.014164296 |
| ENSG00000160013  | PTGIR      | 0.184208693  | 0.056070289  | -0.236905926 | 0.292976215  | 0.999933887 | 2.112590223  | 1.0946958746 | -0.1094368523 | 0.014167611 |
| ENSG00000134452  | FBH1       | 4.187715419  | 0.02505346   | 0.024787722  | 0.000265737  | 0.999933887 | -0.118455227 | -0.401722522 | 0.283267295   | 0.014219225 |
| ENSG00000178028  | DMAPI1     | 3.971919006  | -0.073080324 | -0.007018206 | -0.060682119 | 0.999933887 | 0.066433665  | -0.177568112 | 0.244001778   | 0.014262378 |
| ENSG00000136048  | DRAM1      | 5.486728626  | -0.007692011 | -0.063379066 | 0.055687054  | 0.999933887 | 1.825290721  | 2.347123607  | -0.521833886  | 0.014262378 |
| ENSG00000161204  | ABCF3      | 4.539952492  | -0.043404046 | 0.012959797  | -0.056362044 | 0.999933887 | -0.05849678  | -0.37330926  | 0.314812479   | 0.014306387 |
| ENSG00000106628  | POLD2      | 2.309096681  | 0.055568851  | -0.070504216 | 0.126073067  | 0.999933887 | 0.354669295  | 0.814513982  | -0.459844687  | 0.014306387 |
| ENSG00000118496  | FBXO30     | 4.373865764  | -0.123343248 | -0.081851281 | -0.041491967 | 0.999933887 | 0.131062452  | 0.468501807  | -0.334739355  | 0.014361194 |
| ENSG00000229337  | AC079305.2 | 2.502359385  | 0.247419817  | 0.00685206   | 0.240567757  | 0.999933887 | 0.815790147  | 0.670201483  | 0.343650909   | 0.014365099 |
| ENSG00000185043  | CIB1       | 5.70124605   | 0.009008074  | 0.017635034  | -0.00862696  | 0.999933887 | -0.082936328 | -0.297298598 | 0.21436227    | 0.014395085 |
| ENSG00000196502  | SULT1A1    | 5.791296186  | -0.112840811 | -0.059684733 | -0.053156078 | 0.999933887 | -1.124476633 | -1.471065528 | 0.347128895   | 0.014402877 |
| ENSG00000111186  | WNT5B      | -1.764529404 | 0.374535542  | 0.183505859  | 0.191029683  | 0.999933887 | 2.560481492  | 4.272027757  | -1.711546265  | 0.014402877 |
| ENSG00000218565  | AL592429.1 | -1.178158512 | -0.091449694 | 0.474436729  | -0.565886424 | 0.999933887 | 1.465527278  | 2.556874894  | -1.091347616  | 0.014402877 |
| ENSG00000184394  | MAML2      | 6.886173578  | 0.081439687  | 0.081048547  | -0.039651675 | 0.999933887 | 0.689266616  | 0.983666194  | -0.294399577  | 0.014413097 |
| ENSG00000109381  | ELF2       | 6.122993817  | -0.021792107 | -0.053518585 | 0.031726478  | 0.999933887 | 0.474902619  | 0.771583961  | -0.296681342  | 0.014425874 |
| ENSG00000161267  | BDH1       | 1.128901392  | 0.021378715  | 0.099330027  | -0.077951312 | 0.999933887 | 0.079632253  | 0.49970302   | 0.144559402   | 0.014425874 |
| ENSG00000118985  | ELL2       | 6.098135726  | -0.022700552 | -0.030158119 | 0.007457567  | 0.999933887 | 0.537534687  | 0.848326162  | -0.310791475  | 0.014513967 |
| ENSG00000164332  | UBLCP1     | 4.992347883  | -0.079690337 | -0.148206745 | 0.068570408  | 0.999933887 | -0.07444164  | 0.467770122  | -0.542211762  | 0.014548207 |
| ENSG00000116266  | STXBP3     | 5.500037117  | -0.072745559 | -0.117450856 | 0.044705297  | 0.999933887 | -0.177978362 | 0.291159316  | -0.391713768  | 0.014563595 |
| ENSG00000169299  | PGM2       | 3.35978018   | -0.052553489 | -0.08827763  | 0.035724141  | 0.999933887 | -0.117854231 | -0.556121739 | 0.438267507   | 0.014611988 |
| ENSG00000242732  | RTL5       | 1.716497299  | -0.100216677 | 0.260746142  | -0.360962819 | 0.944094537 | -0.221982354 | -0.918634462 | 0.696652108   | 0.014636942 |
| ENSG00000141458  | NPC1       | 6.851303176  | -0.001284045 | -0.024381072 | 0.023097027  | 0.999933887 | 0.329886351  | 0.560811495  | -0.230925143  | 0.014636942 |
| ENSG00000183495  | EP400      | 5.300335502  | 0.042002401  | -0.001438515 | 0.043440916  | 0.999933887 | -0.07888422  | -0.299883096 | 0.220994674   | 0.014663879 |
| ENSG00000168286  | THAP11     | 2.729223279  | 0.009633889  | 0.034010145  | -0.024376256 | 0.999933887 | -0.042043874 | -0.439847027 | 0.397803154   | 0.014665368 |
| ENSG00000180773  | SLC36A4    | 4.082048466  | -0.019563208 | 0.013377082  | -0.03294029  | 0.999933887 | 0.431054067  | 0.862179146  | -0.431125079  | 0.014747037 |
| ENSG00000075413  | MARK3      | 6.773547546  | -0.006157124 | 0.020864359  | -0.027021483 | 0.999933887 | 0.205003126  | 0.397912638  | -0.192909512  | 0.014865658 |
| ENSG00000134627  | PIWIL4     | 2.549170873  | 0.00346155   | -0.096042674 | 0.099504224  | 0.999933887 | 1.13534203   | 1.566398885  | -0.431047855  | 0.014865658 |
| ENSG00000138092  | CENPO      | 1.132166257  | -0.000129372 | 0.161600734  | -0.161730106 | 0.999933887 | 0.834334737  | 1.406881847  | -0.57254675   | 0.014865658 |
| ENSG00000173621  | LRFN4      | 0.091436031  | 0.090888531  | 0.060934701  | 0.02995113   | 0.999933887 | -0.491221959 | -1.249819434 | 0.758897475   | 0.014909641 |
| ENSG00000148296  | SURF6      | 3.672569983  | 0.021804498  | 0.100171949  | -0.078315251 | 0.999933887 | -0.085413446 | -0.48727741  | 0.401863964   | 0.014927328 |
| ENSG00000111007  | ELOA       | 3.578408208  | -0.020624119 | -0.100218615 | 0.079594497  | 0.999933887 | 0.222571127  | 0.485562374  | -0.262991246  | 0.014990028 |
| ENSG00000185745  | IFIT1      | 5.486816474  | -0.15952655  | -0.231432483 | 0.071905933  | 0.999933887 | -1.137975363 | -1.675818018 | 0.537842655   | 0.014990676 |
| ENSG00000133884  | DPF2       | 5.089303583  | -0.079802132 | 0.011581994  | -0.091384126 | 0.999933887 | -0.428248725 | -0.724012848 | 0.295764123   | 0.015016873 |
| ENSG00000133063  | CHIT1      | 2.89009541   | 0.028179297  | 0.01778753   | -0.043699233 | 0.999933887 | 0.831752175  |              |               |             |

|                  |             |              |              |               |              |             |              |               |              |             |
|------------------|-------------|--------------|--------------|---------------|--------------|-------------|--------------|---------------|--------------|-------------|
| ENSG00000115828  | QPCT        | 6.840130742  | 0.014180721  | -0.043042696  | 0.057223417  | 0.999933887 | 0.121890955  | 0.513026845   | -0.391135891 | 0.015851672 |
| ENSG00000135519  | KCNH3       | 3.203373382  | 0.080351999  | 0.009527872   | 0.070824126  | 0.999933887 | -0.151962922 | -0.622121734  | 0.470158812  | 0.015915181 |
| ENSG00000119922  | IFIT2       | 8.328032815  | -0.196746265 | -0.197820648  | 0.001074383  | 0.999933887 | -1.368412893 | -1.863504737  | 0.495091844  | 0.015989053 |
| ENSG00000124107  | SLPI        | 6.813368997  | -0.028954057 | -0.034994363  | 0.006040306  | 0.999933887 | 0.983239957  | 1.339382842   | -0.356142886 | 0.015989053 |
| ENSG00000126391  | FRMD8       | 6.331794645  | -0.014128532 | -0.031278923  | 0.01715039   | 0.999933887 | -0.594312079 | -0.847964957  | 0.253652879  | 0.015989053 |
| ENSG00000155363  | MOV10       | 4.915073189  | 0.061468894  | 0.052946739   | 0.008522154  | 0.999933887 | -0.001514948 | -0.281975899  | 0.280460951  | 0.016005836 |
| ENSG00000105612  | DNASE2      | 4.662103394  | -0.112064597 | -0.033335094  | -0.078729503 | 0.999933887 | -1.416570992 | -1.837733544  | 0.421162652  | 0.016012638 |
| ENSG00000110696  | C11orf58    | 5.749405505  | -0.107889139 | -0.084057877  | -0.023831262 | 0.999933887 | -0.018184571 | -0.197959371  | 0.197778283  | 0.016013602 |
| ENSG00000174165  | ZDHHCH24    | 2.648838928  | 0.075005597  | 0.071588671   | 0.003416926  | 0.999933887 | -0.051483155 | -0.441920734  | 0.390437579  | 0.016013602 |
| ENSG00000125753  | VASP        | 10.04952972  | 0.044570694  | 0.050189151   | -0.005618457 | 0.999933887 | 0.459158402  | 0.725919663   | 0.26676126   | 0.016013602 |
| ENSG00000124151  | NCOA3       | 6.082704409  | 0.033001457  | -0.011041119  | 0.044042575  | 0.999933887 | -0.509322951 | -0.760087628  | 0.250764677  | 0.016013602 |
| ENSG00000145868  | FBXO38      | 5.894349417  | -0.03782571  | -0.050351197  | 0.012525487  | 0.999933887 | 0.235534032  | 0.533319114   | -0.297785083 | 0.016013602 |
| ENSG00000072518  | MARK2       | 6.943436178  | 0.030518088  | 0.085191611   | -0.054673523 | 0.999933887 | -0.422675553 | -0.69194266   | 0.269267107  | 0.016066721 |
| ENSG00000151304  | SRFBP1      | 0.003955739  | -0.049500459 | 0.108101361   | -0.15760182  | 0.999933887 | -0.076491916 | 0.748828255   | -0.825320171 | 0.016156499 |
| ENSG00000173638  | SLC19A1     | 6.737395798  | 0.069371539  | 0.015028005   | 0.054343533  | 0.999933887 | -0.75512772  | -1.096506008  | 0.340993236  | 0.016156612 |
| ENSG00000259354  | AC025580.2  | 2.960912065  | 0.124413873  | 0.099786014   | 0.024627859  | 0.999933887 | 2.395114657  | 3.022808836   | -0.627694179 | 0.016156612 |
| ENSG00000188419  | CHM         | 1.829254738  | 0.072001805  | -0.095278522  | 0.167280327  | 0.999933887 | -0.014676482 | 0.560406618   | -0.5750831   | 0.016156612 |
| ENSG00000107104  | KANK1       | 1.07576382   | -0.099505923 | -0.046004811  | -0.053051112 | 0.999933887 | 1.205516245  | 2.004090324   | -0.798574078 | 0.016156612 |
| ENSG00000163162  | RNF149      | 8.299363348  | 0.019836431  | 0.040636421   | -0.020799991 | 0.999933887 | -0.554935669 | -0.782574734  | 0.227641765  | 0.016156612 |
| ENSG00000161791  | FMNL3       | 5.105190266  | 0.044147563  | -0.057340276  | 0.101487839  | 0.999933887 | 2.35342265   | 2.965421585   | 0.611998934  | 0.016156612 |
| ENSG00000125734  | GPR108      | 7.261136376  | -0.003924045 | 0.000686722   | -0.004610766 | 0.999933887 | 1.471987199  | 1.861429118   | -0.389441919 | 0.016156612 |
| ENSG00000257923  | CUX1        | 5.905766741  | -0.001754593 | -0.012852926  | -0.011098333 | 0.999933887 | 0.193382697  | 0.424406137   | -0.231023439 | 0.016156612 |
| ENSG00000225828  | FAM229A     | 2.4399994    | 0.026082457  | 0.055627329   | -0.029544872 | 0.999933887 | -0.015288881 | -0.417227233  | 0.401938352  | 0.016237211 |
| ENSG00000106009  | BRAT1       | 5.861094439  | 0.004256916  | 0.070492218   | -0.066235302 | 0.999933887 | -0.468171609 | -0.809824665  | 0.341653056  | 0.016237211 |
| ENSG00000165879  | FRAT1       | 5.450188905  | -0.140470818 | -0.254616366  | -0.114138348 | 0.999933887 | -1.371269236 | -1.8930903    | 0.522639794  | 0.01627742  |
| ENSG00000182054  | IDH2        | 4.695546007  | -0.041028251 | 0.015296399   | -0.05355789  | 0.999933887 | -0.187284705 | -0.411879515  | 0.22459481   | 0.01627742  |
| ENSG00000113448  | PDE4D       | 4.836060579  | 0.020903217  | -0.111704883  | 0.1326081    | 0.999933887 | -0.233968444 | 0.155372849   | -0.389341293 | 0.01627742  |
| ENSG00000059728  | MXD1        | 10.981261541 | -0.000416339 | 0.016621274   | -0.071308063 | 0.999933887 | 0.508145395  | 0.7098321     | -0.201686705 | 0.016342314 |
| ENSG00000122482  | ZNF644      | 4.248658072  | -0.048165372 | -0.124529102  | 0.07636373   | 0.999933887 | 0.197954536  | 0.624721217   | 0.016395869  | 0.016395869 |
| ENSG00000178537  | SLC25A20    | 1.854661903  | 0.037109463  | -0.012096124  | 0.049205586  | 0.999933887 | -0.090795239 | -0.567765795  | 0.476970556  | 0.016423264 |
| ENSG00000184207  | PGP         | 2.888588982  | 0.162993241  | 0.040087041   | 0.12290638   | 0.999933887 | -0.115288938 | -0.573950823  | 0.458661884  | 0.016445691 |
| ENSG00000145365  | TIFA        | 3.621265918  | 0.026073216  | 0.026075106   | 0.05318811   | 0.999933887 | 1.970353794  | 2.546078695   | -0.575724902 | 0.016475589 |
| ENSG00000166619  | BLCAP       | 4.422926105  | 0.002151323  | -0.00855692   | 0.010708243  | 0.999933887 | -0.266515493 | -0.5187875    | 0.252272007  | 0.016475589 |
| ENSG00000090487  | SPG21       | 6.882757367  | -0.003163702 | -0.038834618  | 0.007197595  | 0.999933887 | 0.333704091  | -0.1814903269 | -0.181199178 | 0.016570464 |
| ENSG00000001617  | SEMA3F      | -0.173194469 | 0.201201913  | 0.003480034   | 0.197721188  | 0.999933887 | -0.108484604 | 0.659965718   | -0.768450322 | 0.016570464 |
| ENSG000000064201 | TSPAN32     | 4.239712826  | 0.044326904  | 0.0507701902  | -0.012744998 | 0.999933887 | -0.150884414 | -0.480377953  | 0.329493539  | 0.016570464 |
| ENSG00000125510  | OPRL1       | 0.168755098  | 0.010442415  | 0.024688645   | -0.25444035  | 0.999933887 | -0.881322709 | -1.825348711  | 0.944026002  | 0.016570464 |
| ENSG00000237576  | LINC01888   | 2.605887108  | 0.091985328  | 0.000230014   | 0.091755314  | 0.999933887 | 0.958816549  | 1.378621278   | -0.419804729 | 0.016575242 |
| ENSG00000133961  | NUMB        | 8.53167444   | 0.00194292   | -0.029724439  | 0.031667359  | 0.999933887 | 0.470019789  | 0.207289198   | 0.1673452    | 0.016918715 |
| ENSG00000198554  | WDHD1       | -0.661910829 | -0.139569474 | -0.225340589  | 0.085771114  | 0.999933887 | -0.324777012 | 0.385015325   | -0.709792337 | 0.016918715 |
| ENSG00000175643  | RM12        | 1.948856457  | -0.038255995 | -0.1901702232 | 0.151916236  | 0.999933887 | 0.656975492  | 1.155920742   | -0.498945249 | 0.016822687 |
| ENSG00000130830  | MPP1        | 8.812309549  | -0.078402632 | -0.083795004  | 0.005392372  | 0.999933887 | -0.118565628 | 0.117058417   | -0.235624045 | 0.016829965 |
| ENSG00000126804  | ZBTB1       | 6.172508566  | -0.050980696 | -0.095836325  | 0.044855629  | 0.999933887 | 0.022874045  | 0.338783135   | -0.315990989 | 0.016851768 |
| ENSG00000197930  | ERO1A       | 5.199945674  | -0.017416136 | -0.039981362  | 0.022565226  | 0.999933887 | -0.424933454 | -0.693356035  | 0.268422581  | 0.016904787 |
| ENSG00000149182  | ARFGAP2     | 5.528844315  | -0.015513088 | -0.027389125  | 0.011876037  | 0.999933887 | -0.169587082 | -0.359192299  | 0.189605846  | 0.016918715 |
| ENSG00000063978  | RNF4        | 5.574145689  | -0.016257166 | -0.034002243  | 0.017745077  | 0.999933887 | -0.36239631  | -0.594772921  | 0.232375911  | 0.016918715 |
| ENSG00000214253  | FIS1        | 4.376267212  | 0.02662835   | 0.001440691   | 0.02518766   | 0.999933887 | -0.077098246 | -0.354709493  | 0.277611246  | 0.016931578 |
| ENSG00000103591  | AAGAB       | 3.745645738  | -0.055794411 | -0.110080666  | 0.054214255  | 0.999933887 | 0.38656415   | 0.70485943    | -0.31829528  | 0.016933643 |
| ENSG00000117713  | ARID1A      | 7.170482015  | 0.008019646  | 0.052705716   | -0.04468607  | 0.999933887 | -0.274785511 | -0.518151416  | 0.243365905  | 0.016933643 |
| ENSG00000165006  | UBAP1       | 7.781948812  | -0.012110561 | -0.069865313  | 0.057574752  | 0.999933887 | 0.290591212  | 0.503935565   | -0.213344353 | 0.016964    |
| ENSG00000167967  | E4F1        | 4.805199585  | 0.085181787  | 0.092826935   | -0.007647598 | 0.999933887 | -0.179818919 | -0.514802009  | 0.334983091  | 0.016972079 |
| ENSG00000224597  | SVIL-AS1    | 1.70998374   | 0.003028045  | -0.118747502  | 0.121775547  | 0.999933887 | 0.105964687  | 0.622290856   | -0.516326169 | 0.016972079 |
| ENSG00000111490  | TBC1D30     | 1.872051188  | -0.14981231  | -0.14981231   | 0.137706892  | 0.999933887 | 0.105005357  | -0.1502125733 | -0.451202376 | 0.017072827 |
| ENSG00000157227  | MMP14       | 1.862174206  | 0.097212361  | 0.079961439   | 0.017250922  | 0.999933887 | 2.2346455    | 3.017633171   | -0.782987671 | 0.017124722 |
| ENSG00000122882  | ECD         | 4.671038551  | -0.001766268 | -0.112570655  | 0.110804387  | 0.999933887 | 0.253211017  | 0.492171546   | -0.23896053  | 0.017169896 |
| ENSG00000161921  | XCRL16      | 9.6272892    | 0.042644582  | -0.06879361   | -0.006234779 | 0.999933887 | -0.228239394 | 0.064873768   | -0.293113162 | 0.017376857 |
| ENSG00000171503  | ETFDH       | 2.364607084  | -0.047931326 | 0.016445283   | -0.064376609 | 0.999933887 | -0.150254984 | 0.238246953   | -0.388501937 | 0.017393786 |
| ENSG00000196189  | SEMA4A      | 6.862010081  | 0.018567925  | -0.019590122  | 0.038518047  | 0.999933887 | 0.799364886  | -0.388271792  | 0.017393786  | 0.017393786 |
| ENSG00000269293  | ZSCAN16-AS1 | 1.14159728   | -0.134611632 | -0.302356866  | 0.167745234  | 0.999933887 | 0.533580464  | 1.026241622   | -0.492661156 | 0.017401471 |
| ENSG00000255443  | CD44-AS1    | 3.248959645  | -0.061606083 | 0.055926038   | -0.11752672  | 0.999933887 | 1.53030452   | 2.164282915   | -0.629252463 | 0.017401471 |
| ENSG00000126822  | PLEKHG3     | 7.404829493  | 0.001353658  | 0.090749738   | -0.08939608  | 0.999933887 | -0.396495094 | -0.70787563   | 0.311380536  | 0.017401471 |
| ENSG00000172575  | RASGRP1     | 4.151447625  | 0.001058812  | -0.054238212  | 0.055297024  | 0.999933887 | 0.098281327  | 0.441789741   | -0.343508415 | 0.017401471 |
| ENSG00000153551  | CM1MT7      | 3.876838142  | 0.069963296  | 0.116582498   | -0.046619202 | 0.999933887 | -0.271184947 | -0.679435879  | 0.408250931  | 0.017431346 |
| ENSG00000160877  | NACC1       | 4.529563634  | 0.023301524  | -0.009608228  | 0.032909753  | 0.999933887 | -0.54344317  | -0.856592006  | 0.31314859   | 0.017433638 |
| ENSG00000172733  | HINFP       | 2.717924283  | -0.068306521 | -0.035797478  | -0.032509043 | 0.999933887 | -0.2501128   | -0.645782191  | 0.395669391  | 0.017467316 |
| ENSG00000281420  | POLK1052.1  | -0.453497025 | 0.052120443  | 0.177935291   | -0.125814849 | 0.999933887 | 1.239290162  | 2.096161941   | -0.856871779 | 0.017500888 |
| ENSG00000122008  | APOL        | 2.434502606  | -0.115156035 | -0.261968635  | 0.1468108    | 0.999933887 | -0.205110224 | 0.514134463   | -0.719244687 | 0.017577709 |
| ENSG00000154978  | VOPP1       | 6.858034054  | -0.040094085 | -0.053341108  | 0.013247023  | 0.999933887 | 0.270587053  | 0.582389862   | -0.311802809 | 0.01765558  |
| ENSG00000175029  | CTBP2       | 4.996736822  | -0.011806026 | -0.00618624   | -0.005637786 | 0.999933887 | -0.416636703 | -0.693508083  | 0.27687238   | 0.017685912 |
| ENSG0000017939   | OXSRI       | 7.87765093   | -0.031916936 | -0.0516001    | 0.019683164  | 0.999933887 | 0.189895921  | 0.456424442   | -0.266528521 | 0.017696496 |
| ENSG00000155097  | ATP6V1C1    | 7.205479725  | -0.081363688 | -0.014927913  | -0.066708475 | 0.999933887 | 0.372425954  | 0.660704255   | -0.288278301 | 0.017717231 |
| ENSG00000128563  | PKRIP1      | 4.0976       |              |               |              |             |              |               |              |             |

|                  |            |              |              |              |              |             |              |              |              |             |
|------------------|------------|--------------|--------------|--------------|--------------|-------------|--------------|--------------|--------------|-------------|
| ENSG00000169660  | HEXD       | 3.870144027  | 0.04377214   | 0.087020576  | -0.043248436 | 0.999933887 | -0.058997893 | -0.447669    | 0.388671107  | 0.018457725 |
| ENSG00000121716  | PILRB      | 3.114439211  | -0.017252151 | 0.079944258  | -0.097194689 | 0.999933887 | 0.771906259  | 1.338368339  | -0.56646208  | 0.018495435 |
| ENSG00000183484  | GPR132     | 5.279336332  | 0.145827322  | 0.167252362  | -0.002142559 | 0.999933887 | 1.351945106  | 0.190675124  | -0.558730018 | 0.018521393 |
| ENSG00000108788  | MLX        | 5.117458866  | -0.085929284 | -0.018074333 | -0.067854951 | 0.999933887 | -0.933021953 | -1.27039623  | 0.337374277  | 0.018521393 |
| ENSG00000108604  | SMARCD2    | 5.600537     | 0.044645688  | 0.020965683  | 0.023680005  | 0.999933887 | -0.367725566 | -0.637940443 | 0.270214877  | 0.018545522 |
| ENSG00000140153  | WDR20      | 4.604527072  | -0.032978282 | -0.044198009 | 0.011219727  | 0.999933887 | 0.169654961  | 0.411168957  | -0.241513997 | 0.018551277 |
| ENSG00000102572  | STK24      | 5.898806274  | -0.034504682 | -0.031770308 | -0.002734373 | 0.999933887 | -0.816577347 | -1.136658678 | 0.320081331  | 0.018630133 |
| ENSG00000102401  | ARMXC3     | 5.158048029  | 0.072420393  | 0.067545099  | 0.139961383  | 0.999933887 | 0.50467542   | 0.818798303  | -0.314122883 | 0.018648127 |
| ENSG00000149532  | CPSF7      | 7.191010307  | -0.041304772 | -0.042953966 | 0.001649194  | 0.999933887 | 0.100761667  | 0.277655337  | -0.176894171 | 0.018648472 |
| ENSG00000149480  | MTA2       | 5.014892398  | 0.051551782  | 0.050843344  | 0.000708438  | 0.999933887 | 0.100172448  | -0.138180798 | 0.238353246  | 0.018648472 |
| ENSG00000181649  | PHLDA2     | 3.362493764  | 0.451824118  | 0.412295341  | 0.039528777  | 0.999933887 | 1.84595073   | 2.353553145  | -0.507602414 | 0.018695933 |
| ENSG00000139437  | TCHP       | 3.812637021  | -0.001608103 | -0.126650989 | 0.125042885  | 0.999933887 | -1.346660438 | -1.864483208 | 0.517822771  | 0.018716206 |
| ENSG00000137801  | THBS1      | 4.933753946  | 0.068990931  | 0.086414886  | -0.017423955 | 0.999933887 | 0.424581297  | 1.035330095  | -0.610748798 | 0.018726434 |
| ENSG00000131236  | CAP1       | 8.234651079  | -0.022291912 | -0.06093648  | 0.038644568  | 0.999933887 | -0.578626669 | -0.883084927 | 0.304458258  | 0.018873697 |
| ENSG00000166295  | ANAPC16    | 5.049145075  | 0.022437962  | 0.031697254  | -0.009259292 | 0.999933887 | 0.331555964  | 0.574081909  | -0.242525945 | 0.018942994 |
| ENSG00000070476  | ZXDC       | 5.964922511  | -0.005664819 | -0.006277239 | 0.00061242   | 0.999933887 | -0.611377648 | -0.842060319 | 0.230682671  | 0.018955865 |
| ENSG00000072310  | SREBF1     | 6.705017434  | 0.037467879  | 0.041821266  | -0.004353376 | 0.999933887 | 0.451288066  | 0.700960448  | -0.249672382 | 0.018959397 |
| ENSG00000071583  | ATP6AP1    | 8.547507946  | -0.049416281 | -0.043532103 | -0.005884179 | 0.999933887 | 0.613830034  | 0.828749808  | -0.214919774 | 0.018972246 |
| ENSG00000165131  | LLCF1      | -0.403338406 | 0.164377422  | -0.267319254 | 0.431696676  | 0.999933887 | -0.766688144 | -1.547469807 | 0.780781664  | 0.019007582 |
| ENSG00000112511  | PHF1       | 7.623057645  | 0.028664365  | 0.058208193  | -0.029543828 | 0.999933887 | 0.536606046  | 0.756219155  | -0.219613109 | 0.019064876 |
| ENSG00000140853  | NLRCS      | 8.380759594  | 0.053785191  | 0.032723777  | 0.021061414  | 0.999933887 | -0.321709437 | -0.551475334 | 0.229765897  | 0.01909151  |
| ENSG00000149231  | CCDC82     | 5.163056616  | -0.107776268 | -0.154585757 | 0.046809489  | 0.999933887 | 0.638824301  | 1.375012963  | -0.736197664 | 0.01909151  |
| ENSG00000270457  | AC093424.1 | -0.47289177  | -0.112905812 | -0.037430392 | -0.07547542  | 0.999933887 | 1.017316664  | 1.867021903  | -0.849705239 | 0.01909151  |
| ENSG00000191747  | LRRRC8B    | 3.011017673  | -0.041704958 | 0.002070592  | -0.04377555  | 0.999933887 | 0.484503593  | 0.932848152  | -0.448344559 | 0.01909151  |
| ENSG00000120314  | WDR55      | 4.628243982  | -0.01678596  | -0.00478506  | -0.012000899 | 0.999933887 | -0.230349892 | -0.468609535 | 0.238259644  | 0.01909151  |
| ENSG00000013275  | PSMC4      | 5.338842624  | -0.011339558 | 0.011590991  | -0.022930549 | 0.999933887 | 0.392373193  | 0.652396881  | -0.260023688 | 0.01909151  |
| ENSG00000181135  | ZNF707     | 2.467970492  | 0.059802304  | 0.133406838  | -0.073604535 | 0.999933887 | -0.034971636 | -0.418819493 | 0.383847857  | 0.019144384 |
| ENSG00000159388  | BTG2       | 9.768035326  | 0.364412936  | 0.369364415  | -0.004951478 | 0.999933887 | 1.006843983  | 1.428214917  | -0.421370934 | 0.019165546 |
| ENSG00000046653  | GPM6B      | 6.025083964  | -0.20935902  | -0.14486916  | -0.0648896   | 0.999933887 | 0.094928037  | -0.88067843  | -0.781250393 | 0.019165546 |
| ENSG00000161036  | LWRD1      | 5.100663282  | 0.044671423  | 0.110745287  | -0.066073863 | 0.999933887 | -0.112165853 | -0.402792394 | 0.290626541  | 0.019165546 |
| ENSG00000196387  | ZNF140     | 2.997554288  | -0.040229198 | -0.073584611 | 0.033355413  | 0.999933887 | 0.326560611  | 0.639966281  | -0.31340567  | 0.019165546 |
| ENSG00000036054  | TBC1D23    | 5.00642358   | -0.042190038 | -0.092685936 | 0.050495898  | 0.999933887 | -0.023184439 | -0.359168075 | -0.359152515 | 0.019207797 |
| ENSG000000064703 | DDX20      | 3.402223121  | -0.03289515  | -0.026514664 | -0.006380486 | 0.999933887 | -0.111538102 | -0.435629225 | 0.324091123  | 0.019207797 |
| ENSG00000164054  | SHISA5     | 7.866543889  | 0.079431504  | 0.011970259  | 0.067461245  | 0.999933887 | -0.467220802 | -0.802588581 | 0.335367778  | 0.019248971 |
| ENSG00000165915  | SLC39A13   | 4.070149649  | 0.075108475  | -0.021643629 | 0.096752104  | 0.999933887 | 0.280941034  | 0.594202237  | -0.313261203 | 0.019248971 |
| ENSG00000118308  | IRAG2      | 6.522404716  | -0.061007314 | -0.118640624 | 0.05763331   | 0.999933887 | -0.574142323 | -0.886398668 | 0.312256345  | 0.019248971 |
| ENSG00000100461  | RBM23      | 7.169319836  | -0.021093341 | 0.005499617  | -0.026592508 | 0.999933887 | 0.596925805  | 0.828713909  | -0.231788104 | 0.019248971 |
| ENSG00000188191  | PRKAR1B    | 1.351835343  | 0.059136973  | 0.120212394  | -0.061075421 | 0.999933887 | 0.336267742  | 0.961478547  | -0.625210805 | 0.019248971 |
| ENSG00000175470  | PPP2R2D    | 5.813431072  | -0.012599575 | 0.024096375  | 0.0114968    | 0.999933887 | 0.192814972  | 0.373324792  | -0.18050982  | 0.019248971 |
| ENSG00000172869  | DMXL1      | 3.935068142  | -0.0036904   | -0.13805764  | 0.13436724   | 0.999933887 | -0.195860582 | 0.328307403  | -0.524167985 | 0.019248971 |
| ENSG00000159348  | CYBSR1     | 5.022593551  | -0.015590881 | -0.021116686 | 0.00557598   | 0.999933887 | -0.636745273 | -0.283886496 | 0.019253943  | 0.019253943 |
| ENSG00000114030  | KPNA1      | 5.57091542   | -0.053229444 | -0.084659394 | 0.031429949  | 0.999933887 | -0.202870508 | 0.005202331  | -0.208072839 | 0.01929538  |
| ENSG00000273604  | EPOP       | 1.39809035   | 0.086009837  | 0.176187135  | -0.090157298 | 0.999933887 | 2.092359671  | 2.719842871  | -0.6274832   | 0.01929538  |
| ENSG00000118637  | MAK        | 3.678491867  | -0.045635743 | 0.02153147   | -0.067167213 | 0.999933887 | 0.184171303  | 0.495344492  | -0.311263189 | 0.019300053 |
| ENSG00000141337  | ARSG       | 4.005019449  | -0.084239974 | -0.074205444 | -0.01003453  | 0.999933887 | -0.149541873 | -0.466557528 | 0.317015655  | 0.019322219 |
| ENSG000000238018 | AC093110.1 | 1.027340254  | -0.099935186 | -0.396057772 | 0.296122586  | 0.999933887 | 0.020164712  | 0.441335918  | -0.421189206 | 0.019402191 |
| ENSG000000047249 | ATP6V1H    | 4.996827613  | -0.034360211 | -0.021861437 | -0.056221648 | 0.999933887 | 0.662150731  | 0.964425358  | -0.302274627 | 0.019402191 |
| ENSG00000116044  | NFE2L2     | 8.495838126  | -0.016574664 | -0.03301314  | 0.016438476  | 0.999933887 | 0.736253006  | 1.043968152  | -0.307713145 | 0.019402191 |
| ENSG00000137767  | SQOR       | 5.041867824  | 0.01163546   | -0.05801786  | 0.06965332   | 0.999933887 | 0.828033237  | 1.188550845  | -0.360517607 | 0.019402191 |
| ENSG00000136485  | DCAF7      | 4.995975259  | -0.08825825  | 0.022044737  | -0.110302987 | 0.999933887 | -0.337501475 | -0.613610075 | 0.2761086    | 0.019440913 |
| ENSG00000073417  | PDE8A      | 2.616537674  | 0.013637068  | 0.00546076   | 0.005090993  | 0.999933887 | 0.285013193  | 0.702556231  | -0.417552445 | 0.019552784 |
| ENSG00000138835  | RG3        | 4.11939002   | 0.093105624  | 0.005956858  | 0.092148766  | 0.999933887 | -0.250446524 | -0.654597281 | 0.404150757  | 0.019589301 |
| ENSG00000075618  | FSCN1      | 2.919385715  | 0.064231206  | -0.089866135 | 0.154097342  | 0.999933887 | 2.475703757  | 3.221965262  | -0.746261504 | 0.019589301 |
| ENSG000000051523 | CYBA       | 9.178312278  | 0.068204279  | 0.015301427  | 0.052902851  | 0.999933887 | 0.985319545  | 1.324408758  | -0.339089214 | 0.01961462  |
| ENSG00000226648  | PLCG1-AS1  | 2.020068743  | 0.093300693  | 0.005745698  | 0.087554994  | 0.999933887 | -0.080930057 | 0.468117651  | -0.549047708 | 0.019636955 |
| ENSG000000215458 | AATBC      | 1.060080035  | 0.036298143  | 0.062958984  | -0.004561742 | 0.999933887 | 0.825320222  | 1.495409542  | -0.067089322 | 0.019730598 |
| ENSG00000107738  | VSIR       | 9.442960556  | -0.009362462 | -0.008176713 | -0.001185749 | 0.999933887 | -0.430183561 | -0.734444068 | 0.304261047  | 0.019730598 |
| ENSG00000164111  | ANXA5      | 7.443725353  | 0.002587578  | -0.040585495 | 0.043173073  | 0.999933887 | 1.346094054  | 1.687759226  | -0.341665173 | 0.019730598 |
| ENSG00000112379  | ARFGF3     | -1.240230178 | 0.098290083  | 0.625327037  | -0.527036955 | 0.999933887 | 0.874449681  | 1.59444942   | -0.719999474 | 0.019746995 |
| ENSG00000171298  | GAA        | 6.184341239  | 0.048233169  | 0.033168487  | 0.015064682  | 0.999933887 | -0.244606991 | 0.50848487   | 0.263877879  | 0.019752552 |
| ENSG00000213639  | PPP1CB     | 7.529225162  | -0.087492396 | -0.063194267 | -0.024298129 | 0.999933887 | -0.084130884 | 0.220686428  | -0.304999311 | 0.01975449  |
| ENSG00000213347  | MXD3       | 3.663905161  | 0.50537919   | 0.059588258  | -0.00905034  | 0.999933887 | -0.107534301 | -0.53860925  | 0.43107495   | 0.019770664 |
| ENSG00000105127  | AKAP8      | 5.390287569  | -0.000665917 | 0.022644115  | -0.023307082 | 0.999933887 | -0.161694085 | -0.366675515 | -0.204981429 | 0.019770664 |
| ENSG00000255921  | AC026310.1 | 2.384324374  | -0.409115763 | -0.083318626 | -0.325797137 | 0.999933887 | 2.102207969  | 3.430342166  | -1.328134197 | 0.019790423 |
| ENSG00000047315  | POLR2B     | 5.469007736  | -0.117025692 | -0.109447267 | -0.001278466 | 0.999933887 | -0.296412061 | -0.536326266 | 0.239914205  | 0.019801029 |
| ENSG00000128294  | TPST2      | 6.104632222  | 0.023371912  | 0.00956458   | 0.013807332  | 0.999933887 | -0.745557514 | -1.055479049 | 0.309921895  | 0.019801029 |
| ENSG00000146376  | ARHGAP18   | 3.063857264  | -0.174628357 | -0.033453222 | -0.114283035 | 0.999933887 | -0.455504539 | -0.880733464 | -0.373801076 | 0.019808519 |
| ENSG00000224609  | HSD5       | 3.092397928  | 0.252506261  | 0.129432837  | 0.123073424  | 0.999933887 | 1.271381906  | 1.79488294   | -0.523501034 | 0.019829039 |
| ENSG00000103876  | FAH        | 1.600446303  | -0.187019501 | 0.315149629  | -0.502169129 | 0.944094537 | -0.432121033 | -0.814786413 | 0.38266538   | 0.019829039 |
| ENSG00000114861  | FOXP1      | 4.799667441  | -0.063940731 | 0.028919249  | -0.09285998  | 0.999933887 | 0.383399453  | 0.785204656  | -0.401805204 | 0.019829039 |
| ENSG00000146063  | TRIM41     | 4.494919472  | 0.076656442  | 0.052599808  | 0.024056634  | 0.999933887 | -0.216844162 | -0.507117072 | 0.290266558  | 0.019960797 |
| ENSG00000156508  | EEF1A1     | 1            |              |              |              |             |              |              |              |             |

|                   |            |              |              |              |              |             |              |               |              |             |
|-------------------|------------|--------------|--------------|--------------|--------------|-------------|--------------|---------------|--------------|-------------|
| ENSG000000071054  | MAP4K4     | 9.783929495  | -0.044631056 | -0.007489439 | -0.037141617 | 0.999933887 | 0.40181685   | 0.601935254   | -0.200118403 | 0.020769419 |
| ENSG000000185404  | SP140L     | 4.27168288   | -0.045178488 | -0.066552537 | 0.021374049  | 0.999933887 | -0.290678511 | 0.526930075   | 0.236251565  | 0.020769419 |
| ENSG000000148965  | PGAP2      | 3.920419495  | 0.045041952  | -0.028538742 | 0.073580694  | 0.999933887 | 0.742987668  | 1.128182164   | -0.385194496 | 0.020769419 |
| ENSG000000158850  | B4GALT3    | 4.142032927  | 0.021300574  | 0.052098421  | -0.030797847 | 0.999933887 | -0.115279216 | -0.351928715  | 0.236649499  | 0.020769419 |
| ENSG000000163482  | STK36      | 2.510255551  | 0.032198235  | -0.080244451 | 0.112442686  | 0.999933887 | 0.53284275   | 0.877792783   | -0.344950033 | 0.020769419 |
| ENSG000000246575  | AC093162.1 | 2.611078876  | -0.017235689 | -0.097210483 | 0.079975154  | 0.999933887 | -0.317062831 | -0.691655664  | 0.374592822  | 0.020769419 |
| ENSG000000102531  | FNDC3A     | 6.345639422  | -0.021782003 | -0.035760261 | 0.013978258  | 0.999933887 | -0.463675762 | -0.089479343  | -0.374196419 | 0.020769419 |
| ENSG000000212907  | MT-ND4L    | 6.03153988   | 0.001316329  | -0.029262644 | 0.084242573  | 0.999933887 | -0.02058827  | -0.331414085  | 0.020769419  | 0.020769419 |
| ENSG000000250616  | AC012645.1 | 1.644984498  | -0.009308995 | 0.008481018  | -0.017790013 | 0.999933887 | -1.157019153 | -2.020096229  | 0.863077077  | 0.020839212 |
| ENSG000000244405  | ETV5       | 0.218188178  | -0.025154275 | -0.087542271 | 0.062387996  | 0.999933887 | 0.756971673  | 1.800482725   | -1.043511052 | 0.021072907 |
| ENSG00000070423   | RNF126     | 4.699187934  | -0.002497975 | 0.02920998   | -0.031707956 | 0.999933887 | -0.078912277 | -0.338690204  | 0.259777928  | 0.02109467  |
| ENSG000000219891  | ZSCAN12P1  | 0.065464981  | 0.147285497  | 0.187875615  | -0.040590118 | 0.999933887 | -0.548424548 | 0.209671003   | -0.758095552 | 0.021123327 |
| ENSG000000198873  | GRK5       | 4.720698901  | 0.016751839  | 0.004927354  | 0.011824485  | 0.999933887 | 0.24316487   | 0.489236397   | -0.246071528 | 0.021139399 |
| ENSG000000180448  | ARHGAP45   | 9.123306221  | 0.052783902  | 0.08581531   | -0.033031408 | 0.999933887 | -0.359422    | -0.661418438  | 0.301996438  | 0.02114403  |
| ENSG000000105928  | GSDME      | -0.544871663 | -0.218137776 | 0.162879203  | -0.381016978 | 0.999933887 | 0.713177304  | 1.388482027   | -0.675304724 | 0.021255058 |
| ENSG000000204681  | GABBR1     | 3.845498769  | 0.052095781  | 0.059581284  | -0.007485503 | 0.999933887 | 0.286308036  | 0.595234641   | -0.308926605 | 0.021255058 |
| ENSG000000077585  | GPR137B    | 2.701959553  | 0.030320366  | 0.028306093  | 0.002014273  | 0.999933887 | 0.219838828  | 0.541872023   | -0.322033195 | 0.021255058 |
| ENSG000000241764  | AC002467.1 | 0.050713245  | -0.029911955 | -0.323573787 | 0.293661833  | 0.999933887 | -0.262838269 | -1.097446111  | 0.834607842  | 0.021255058 |
| ENSG000000085511  | MAP3K4     | 3.022467502  | -0.009244642 | -0.074602375 | 0.065357733  | 0.999933887 | 0.170160987  | 0.536403125   | -0.366242138 | 0.021308422 |
| ENSG000000127616  | SMARCA4    | 4.824265169  | -0.007692931 | 0.020414668  | -0.028107599 | 0.999933887 | -0.027579585 | -0.230242432  | 0.204462847  | 0.021378552 |
| ENSG000000168229  | PTGDR      | 0.791261722  | 0.1080188    | -0.04982347  | 0.157843169  | 0.999933887 | 0.677828123  | 1.343511889   | -0.665683766 | 0.021407437 |
| ENSG000000166507  | NDST2      | 0.288285456  | 0.046565782  | -0.215610204 | 0.262175986  | 0.999933887 | 0.008933907  | -0.728433878  | 0.737367785  | 0.021407437 |
| ENSG000000173320  | STOX2      | 2.779059777  | 0.003941399  | 0.134053974  | -0.130112575 | 0.999933887 | -0.139410994 | 0.159902871   | -0.299313865 | 0.021436896 |
| ENSG000000249115  | HAUS5      | 2.170714725  | 0.035473096  | -0.068864405 | 0.104337501  | 0.999933887 | 0.351757243  | 0.844424059   | -0.492668616 | 0.021481812 |
| ENSG000000165102  | HGSNAT     | 4.588575037  | -0.054612007 | -0.023279478 | -0.031332529 | 0.999933887 | -0.095670335 | -0.353234957  | -0.257564621 | 0.021484232 |
| ENSG000000170852  | KBTBD2     | 6.855151098  | -0.039398921 | -0.00852532  | -0.030873601 | 0.999933887 | 0.130081246  | 0.304000662   | -0.173919416 | 0.021484232 |
| ENSG000000175970  | UNC119B    | 2.807857932  | -0.014445896 | -0.110075215 | 0.095629319  | 0.999933887 | -0.335259134 | -0.697238201  | 0.361979067  | 0.021484232 |
| ENSG000000241058  | NSUN6      | 2.345770631  | 0.01485619   | 0.099131033  | -0.084274843 | 0.999933887 | 0.679020859  | 1.2047099     | -0.525689041 | 0.021484232 |
| ENSG000000109270  | LAMTOR3    | 6.517294642  | 0.004573746  | -0.029917696 | 0.034491442  | 0.999933887 | 0.299794765  | -0.214833092  | -0.675304724 | 0.021484232 |
| ENSG000000102285  | TIMP1      | 6.445366441  | 0.016434206  | -0.016491347 | 0.032925553  | 0.999933887 | 0.271437901  | 0.517914342   | -0.246476442 | 0.021562148 |
| ENSG000000167797  | CDK2AP2    | 3.506216841  | 0.050184372  | 0.06763557   | -0.017451198 | 0.999933887 | 0.023619068  | -0.283367207  | 0.306986274  | 0.021624344 |
| ENSG000000236017  | ALAS1      | 3.604017252  | 0.061675818  | 0.030958125  | 0.026657693  | 0.999933887 | -0.106602742 | -0.432366342  | 0.325763689  | 0.021624344 |
| ENSG000000243927  | MRPS6      | 3.281086532  | 0.019242015  | 0.047232809  | -0.027990794 | 0.999933887 | 0.591195143  | 1.04876831    | -0.457571167 | 0.021624344 |
| ENSG000000204131  | NHSL2      | 5.999584909  | -0.025985246 | -0.020970714 | -0.005014432 | 0.999933887 | -1.004109881 | -1.470713647  | 0.466603766  | 0.021665055 |
| ENSG000000001561  | ENPP4      | 2.023684473  | -0.088408923 | -0.104755889 | 0.016348966  | 0.999933887 | 0.001978517  | 0.569760079   | -0.567782462 | 0.0217522   |
| ENSG000000126653  | NSRP1      | 4.364150075  | -0.093979464 | -0.124873884 | 0.03089442   | 0.999933887 | -0.125414723 | 0.349594937   | -0.47500966  | 0.02181991  |
| ENSG000000112531  | QKI        | 8.19449323   | -0.030407263 | -0.027399598 | -0.003007665 | 0.999933887 | 0.776022792  | 1.139704357   | -0.363681565 | 0.021821932 |
| ENSG000000119681  | LTBP2      | 2.956072599  | 0.059205244  | 0.013441881  | 0.045763363  | 0.999933887 | -0.812510906 | -1.206811421  | 0.394300515  | 0.021822793 |
| ENSG000000001405  | PIK3C2A    | 4.437591582  | -0.05368187  | -0.176713135 | 0.123049265  | 0.999933887 | -0.315104799 | -0.790296448  | 0.021822793  | 0.021822793 |
| ENSG000000113302  | IL12B      | 0.678584304  | -0.204672788 | 0.373749128  | -0.057842196 | 0.999933887 | 1.03756536   | 1.640018116   | -0.602452756 | 0.021879525 |
| ENSG000000124541  | RBP36      | 2.988451499  | -0.081537929 | -0.021287675 | -0.060250255 | 0.999933887 | -0.193790047 | -0.497782269  | 0.303992221  | 0.021953682 |
| ENSG000000096384  | HSP90AB1   | 7.255156533  | -0.050095198 | -0.106557232 | 0.056462034  | 0.999933887 | 0.45118936   | 0.695090194   | -0.243900835 | 0.021958818 |
| ENSG000000171608  | ZNF274     | 6.261814262  | 0.014549656  | 0.028574265  | -0.014024609 | 0.999933887 | 0.146737937  | 0.351404573   | -0.204666637 | 0.022073026 |
| ENSG000000160813  | PPP1R35    | 3.852824149  | 0.105103188  | 0.170213245  | -0.065110057 | 0.999933887 | -0.316687053 | -0.651396654  | 0.334709512  | 0.022078172 |
| ENSG000000196739  | COL27A1    | -0.479095701 | 0.036736729  | 0.143804012  | -0.107067283 | 0.999933887 | 1.377179921  | 2.39786742    | -1.020687498 | 0.022078172 |
| ENSG000000066135  | KDMA4      | 2.612522408  | 0.060567217  | 0.051651955  | 0.008915262  | 0.999933887 | -0.325120079 | -0.735039329  | 0.40991925   | 0.02215695  |
| ENSG000000183864  | T0B2       | 4.493294148  | 0.069320089  | 0.036251837  | 0.033068253  | 0.999933887 | -0.316665908 | -0.603701672  | 0.287035764  | 0.022173102 |
| ENSG000000180679  | CHTOP      | 5.661422984  | -0.026156336 | 0.013228891  | -0.039385227 | 0.999933887 | -0.294392337 | -0.514058642  | 0.219664306  | 0.022222936 |
| ENSG000000082996  | RNF13      | 8.300169145  | -0.078166101 | -0.088397071 | 0.01023097   | 0.999933887 | -0.392877959 | -0.152635265  | -0.240242694 | 0.022354492 |
| ENSG000000167962  | ZNF598     | 4.450833575  | 0.098908892  | 0.132692617  | -0.024783724 | 0.999933887 | 0.539089484  | 0.863503265   | -0.324413782 | 0.02236655  |
| ENSG0000000090413 | REV3L      | 5.588997551  | -0.134714366 | -0.095028015 | -0.039686351 | 0.999933887 | 0.358497964  | -0.70173918   | -0.649241216 | 0.02236655  |
| ENSG000000183621  | ZNF438     | 6.039782024  | -0.030685171 | -0.019890621 | -0.016174348 | 0.999933887 | 0.054664148  | 0.279559375   | -0.224895227 | 0.02236655  |
| ENSG000000215790  | SLC35E2A   | 2.6116355402 | 0.095850559  | 0.119124067  | -0.023273508 | 0.999933887 | -0.392157106 | -0.787862036  | 0.395704929  | 0.022407411 |
| ENSG000000006007  | GDE1       | 3.867410195  | 0.009006753  | -0.138521262 | 0.147528016  | 0.999933887 | -0.321898368 | -0.757698201  | 0.435799832  | 0.022407411 |
| ENSG000000169026  | SLC49A3    | 2.620983215  | 0.081721998  | -0.050630591 | 0.132352516  | 0.999933887 | -0.995474448 | -1.536828682  | 0.541354233  | 0.022428371 |
| ENSG000000123268  | ATF1       | 3.520753755  | -0.079287758 | -0.009135919 | 0.029625833  | 0.999933887 | -0.064298541 | 0.198735964   | -0.263034505 | 0.022446524 |
| ENSG000000242125  | SNHG3      | 3.73929562   | -0.072843018 | 0.048216262  | -0.12105928  | 0.999933887 | 0.125647109  | -0.149683118  | 0.275330227  | 0.022447436 |
| ENSG000000115053  | NCL        | 6.815759375  | -0.039705205 | -0.084097448 | 0.044392243  | 0.999933887 | 0.25689313   | 0.513064055   | -0.253467325 | 0.022618078 |
| ENSG000000163249  | CNNYL1     | 3.706411568  | 0.030780784  | 0.06128459   | -0.023476715 | 0.999933887 | 0.147952109  | 0.451111073   | -0.303158964 | 0.022653606 |
| ENSG000000149716  | LT01       | 3.052593633  | -0.066488355 | -0.100328924 | 0.033750569  | 0.999933887 | -0.08628084  | -0.339105077  | 0.252824237  | 0.02266467  |
| ENSG000000076770  | MBNL3      | 2.48803395   | -0.097642002 | -0.063386232 | -0.034255771 | 0.999933887 | -0.243690347 | 0.406415708   | -0.650106054 | 0.02266467  |
| ENSG000000178761  | FAM219B    | 2.159898794  | 0.007895325  | -0.109823563 | 0.117718888  | 0.999933887 | 0.07226678   | -0.317547201  | 0.389813981  | 0.022676565 |
| ENSG000000159128  | IFNGR2     | 7.826886407  | -0.002372084 | 0.010233647  | -0.012605731 | 0.999933887 | 1.449021766  | 1.770795556   | -0.32177379  | 0.022723894 |
| ENSG000000124762  | CDKN1A     | 7.146333029  | 0.243007898  | 0.262830201  | -0.019822303 | 0.999933887 | 1.183007137  | 1.540861108   | -0.357853971 | 0.022730871 |
| ENSG000000101493  | ZNF156     | 6.440030957  | 0.017393572  | 0.055325585  | -0.037932013 | 0.999933887 | -0.653520203 | -0.926181689  | 0.270661486  | 0.022761432 |
| ENSG000000137547  | MRPL15     | 1.208977996  | -0.085466993 | 0.182902146  | -0.268371209 | 0.999933887 | -0.043229626 | 0.44719916    | -0.490428786 | 0.022799205 |
| ENSG000000141497  | ZMYND15    | 5.375091627  | -0.001911084 | -0.010651286 | 0.008740202  | 0.999933887 | -0.426785109 | -0.303208494  | 0.022806892  | 0.022806892 |
| ENSG000000164823  | OSGIN2     | 6.233409878  | -0.053112935 | 0.018068846  | -0.07118178  | 0.999933887 | 0.048070076  | 0.327222011   | -0.279151935 | 0.022819217 |
| ENSG000000159069  | FBXW5      | 5.802320848  | 0.05153199   | 0.018852072  | 0.032679918  | 0.999933887 | 0.00502816   | -0.25907571   | 0.26410387   | 0.022827491 |
| ENSG000000135114  | OASL       | 5.275420502  | 0.030987304  | -0.035576628 | 0.066639332  | 0.999933887 | -0.157731873 | -0.4950204982 | 0.337293109  | 0.022878301 |
| ENSG000000134243  | SORT1      | 3            |              |              |              |             |              |               |              |             |

|                   |            |              |              |              |              |             |              |              |              |             |
|-------------------|------------|--------------|--------------|--------------|--------------|-------------|--------------|--------------|--------------|-------------|
| ENSG00000156042   | CFAP70     | 1.161647234  | -0.010034756 | -0.089791407 | 0.079756651  | 0.999933887 | 0.644948646  | 1.263096133  | -0.618147488 | 0.024556015 |
| ENSG000000166016  | ABTB2      | 3.60285247   | -0.009854434 | -0.016361941 | 0.006507507  | 0.999933887 | 0.398362422  | 0.822377569  | -0.424015147 | 0.024554795 |
| ENSG000000011304  | PTBP1      | 6.846958324  | 0.006967807  | 0.021464646  | -0.014496839 | 0.999933887 | -0.14236932  | 0.179899176  | 0.024619635  |             |
| ENSG000000178234  | GALNT11    | 4.369141516  | -0.003557189 | 0.010278807  | -0.013835996 | 0.999933887 | 0.200912848  | 0.4191982    | -0.218285352 | 0.024630167 |
| ENSG000000067798  | NAV3       | 0.293640316  | -0.059439534 | -0.117392842 | 0.057953308  | 0.999933887 | 2.101244205  | 2.906406765  | -0.805216566 | 0.024644695 |
| ENSG000000134780  | DAGLA      | 1.161775735  | -0.052288096 | 0.169576294  | -0.22186439  | 0.999933887 | -0.129467061 | 0.391969574  | -0.521436635 | 0.024644695 |
| ENSG000000197136  | PCN3       | 6.586279521  | 0.005037677  | 0.048708832  | -0.043671156 | 0.999933887 | -0.203493045 | -0.40588627  | 0.202395681  | 0.024668597 |
| ENSG000000143933  | CALM2      | 7.088392152  | -0.089079777 | -0.116892058 | 0.02781228   | 0.999933887 | -0.459278338 | -0.698757111 | 0.239478773  | 0.024687679 |
| ENSG000000088079  | IFI35      | 4.696236008  | 0.017779105  | -0.071643147 | 0.069434221  | 0.999933887 | -0.439368513 | -0.776158311 | 0.336789798  | 0.024687679 |
| ENSG000000072062  | PRKACA     | 5.547096984  | 0.006991971  | 0.030958846  | -0.023968675 | 0.999933887 | -0.104862117 | -0.377998963 | 0.273036566  | 0.024744546 |
| ENSG000000160741  | CRTC2      | 7.621366629  | 0.018632686  | 0.051251198  | -0.032618512 | 0.999933887 | 0.902106845  | 1.120626418  | -0.218519573 | 0.024799411 |
| ENSG000000171867  | PRNP       | 5.786261098  | -0.000415512 | 0.017275544  | -0.017691057 | 0.999933887 | 0.267889901  | 0.51280759   | -0.244917689 | 0.024799411 |
| ENSG000000066336  | SPI1       | 10.297134615 | 0.061479693  | 0.03714822   | 0.024331473  | 0.999933887 | 0.340383037  | 0.539251966  | -0.19886893  | 0.02480964  |
| ENSG000000197302  | ZNF720     | 2.722967887  | 0.04151557   | 0.056571857  | -0.015056287 | 0.999933887 | -0.031808697 | 0.382888186  | -0.414696883 | 0.02480964  |
| ENSG000000140391  | TPAN3      | 4.592059049  | 0.007433155  | -0.008509737 | 0.015942892  | 0.999933887 | 0.361016531  | -0.659599559 | -0.294983028 | 0.02480964  |
| ENSG000000273611  | ZNHIT3     | 2.855074334  | -0.018159318 | -0.072632352 | 0.054473033  | 0.999933887 | -0.12761981  | -0.43579885  | 0.30817904   | 0.024997937 |
| ENSG000000143409  | MINDY1     | 4.822238837  | -0.056047948 | 0.071428513  | -0.127476461 | 0.999933887 | -0.660291252 | -1.066521575 | 0.406230322  | 0.025037515 |
| ENSG000000196371  | FUT4       | 4.040090106  | 0.08140056   | 0.025137139  | 0.056263421  | 0.999933887 | 0.985194358  | 1.322342881  | -0.337148523 | 0.025081883 |
| ENSG000000128463  | EMC4       | 3.49932858   | 0.16813819   | -0.131740147 | 0.148553966  | 0.999933887 | -0.029529075 | -0.294678355 | 0.26514928   | 0.025105783 |
| ENSG000000154832  | CXXC1      | 4.318801307  | 0.054639303  | 0.018798127  | 0.035841175  | 0.999933887 | 0.008369355  | -0.2830952   | 0.292178875  | 0.025153686 |
| ENSG000000092330  | TINF2      | 6.683428219  | 0.039240232  | 0.034832234  | 0.004407998  | 0.999933887 | 0.476429883  | 0.682701315  | -0.206271432 | 0.025153686 |
| ENSG000000120899  | PTK2B      | 9.265902746  | 0.031668734  | 0.027924544  | 0.003744191  | 0.999933887 | 0.887982091  | -0.310865939 | 0.025153686  |             |
| ENSG000000277224  | H2BC7      | 0.430432395  | 0.084342343  | 0.20558706   | -0.121244717 | 0.999933887 | -0.601941891 | -1.606067436 | 1.004125546  | 0.025242413 |
| ENSG000000171421  | MRPL36     | 1.002463798  | 0.001378873  | 0.257687748  | -0.256308875 | 0.999933887 | 0.053143699  | -0.598120633 | 0.651264332  | 0.025250244 |
| ENSG000000006062  | MAP3K14    | 4.129330585  | -0.006898154 | 0.061534008  | -0.068432162 | 0.999933887 | -0.149399982 | -0.437084362 | -0.26784838  | 0.025259189 |
| ENSG000000104529  | EEF1D      | 6.89684508   | 0.002939793  | 0.00534265   | -0.002402857 | 0.999933887 | -0.229188093 | -0.454157324 | 0.224969231  | 0.025259189 |
| ENSG000000198900  | TOP1       | 7.290191045  | -0.039742497 | -0.063337699 | 0.023595201  | 0.999933887 | 0.20066838   | -0.446973934 | -0.246905554 | 0.025310409 |
| ENSG000000147383  | NSDLH      | 0.633414954  | -0.053566345 | 0.01284078   | -0.066407125 | 0.999933887 | 0.034674094  | -0.553339635 | 0.588013729  | 0.025310409 |
| ENSG000000273284  | AP001033.2 | 2.582458378  | -0.148558747 | -0.25165716  | 0.103098413  | 0.999933887 | -0.259445645 | -0.622944103 | 0.025339684  |             |
| ENSG000000070540  | WIP1       | 3.663910632  | -0.050732165 | 0.075745919  | -0.126478085 | 0.999933887 | -0.685082634 | -1.023906478 | 0.338823843  | 0.025381782 |
| ENSG000000023909  | GCLM       | 5.028918478  | -0.070366451 | 0.007311233  | -0.077677683 | 0.999933887 | 0.418167465  | 0.726408467  | -0.308241002 | 0.025381782 |
| ENSG000000028251  | BISPR      | 1.852966571  | 0.172313679  | 0.213505488  | -0.041191809 | 0.999933887 | -0.140055942 | -0.61258099  | 0.472525048  | 0.025498332 |
| ENSG000000024485  | MRPL20     | 3.404949719  | -0.085871701 | -0.122416717 | 0.036539976  | 0.999933887 | -0.158064891 | -0.391634229 | 0.233569737  | 0.025534178 |
| ENSG000000106261  | ZKSCAN1    | 5.125820913  | -0.061029748 | -0.078371533 | 0.017341785  | 0.999933887 | -0.003401401 | -0.230651169 | -0.23045251  | 0.025534178 |
| ENSG000000083814  | ZNF671     | 1.783826485  | 0.065676555  | 0.1017377    | -0.036081144 | 0.999933887 | 0.007907934  | -0.390084826 | 0.39799276   | 0.025534178 |
| ENSG000000133657  | ATP13A3    | 6.866518609  | -0.049299833 | -0.029377399 | -0.019922434 | 0.999933887 | 0.49193398   | 0.922473504  | -0.430539525 | 0.025534178 |
| ENSG000000078403  | MLL110     | 3.845262964  | -0.034187032 | -0.059598285 | 0.025405793  | 0.999933887 | -0.498429571 | -0.823051345 | 0.324621774  | 0.025534178 |
| ENSG000000169429  | CXCL8      | 13.85870056  | 0.547314938  | 0.527723852  | 0.019591086  | 0.999933887 | 2.034739193  | 2.530100787  | -0.495361595 | 0.025544397 |
| ENSG000000164081  | TEX264     | 2.808516155  | 0.036228811  | -0.074145854 | 0.110374465  | 0.999933887 | 0.028325383  | -0.056160232 | 0.378485616  | 0.025559904 |
| ENSG000000198743  | SLCSA3     | 3.949093873  | -0.034692545 | -0.019168621 | 0.077224316  | 0.999933887 | 0.653963885  | 1.319041524  | -0.665077639 | 0.025644012 |
| ENSG000000105717  | PBX4       | 2.156319287  | -0.034802808 | 0.013291502  | -0.048094311 | 0.999933887 | 0.35594664   | 0.74859507   | -0.39264843  | 0.025681919 |
| ENSG000000106460  | TMEM106B   | 4.160864273  | 0.048769767  | -0.163182297 | 0.211952064  | 0.999933887 | -0.473407925 | 0.030549015  | -0.50395694  | 0.025681919 |
| ENSG000000116793  | PHTF1      | 5.017663339  | -0.043605556 | 0.017584691  | -0.061190247 | 0.999933887 | -0.359403324 | -0.585409858 | 0.226006535  | 0.025726915 |
| ENSG000000110848  | CD69       | 5.737848119  | -0.031999641 | -0.079268009 | 0.047268368  | 0.999933887 | 0.132295768  | 0.484214393  | -0.351918625 | 0.025726915 |
| ENSG000000140519  | RHCG       | 1.645547746  | -0.001035673 | 0.246876825  | -0.247912497 | 0.999933887 | 3.830612409  | 5.173221195  | -1.342608786 | 0.025726915 |
| ENSG000000197405  | C5AR1      | 11.056494624 | 0.038543226  | 0.018102939  | 0.024404286  | 0.999933887 | -0.221799028 | -0.005611984 | -0.026373244 | 0.025760935 |
| ENSG000000126698  | DNAJC8     | 6.503319004  | -0.04719119  | -0.122167909 | 0.04796762   | 0.999933887 | 0.547045452  | 0.785856474  | -0.238811022 | 0.025850622 |
| ENSG000000171310  | CHST11     | 7.557069469  | 0.078594715  | 0.105614376  | -0.027019681 | 0.999933887 | -0.197590086 | -0.47832233  | 0.276232245  | 0.025875988 |
| ENSG000000175505  | CLCF1      | 1.986654196  | 0.155913208  | 0.105429302  | 0.050483906  | 0.999933887 | 1.505106886  | 2.136462712  | -0.631355827 | 0.025875988 |
| ENSG000000072958  | AP1M1      | 5.254712139  | 0.042091884  | -0.013114231 | 0.055206116  | 0.999933887 | -0.298687981 | -0.523272583 | 0.224584602  | 0.025875988 |
| ENSG000000092036  | HAUS4      | 2.236151178  | 0.057606191  | -0.022113264 | 0.07873883   | 0.999933887 | -0.232154156 | 0.825730575  | 0.593576419  | 0.025875988 |
| ENSG000000187713  | TMEM203    | 2.546677114  | 0.047105592  | -0.090257756 | 0.137363348  | 0.999933887 | -0.033294763 | -0.425732028 | 0.392437265  | 0.025875988 |
| ENSG000000070759  | TESK2      | 4.538527994  | 0.014112336  | -0.010094773 | 0.024207109  | 0.999933887 | 0.248167706  | 0.513597817  | -0.26543011  | 0.025894986 |
| ENSG000000176973  | FAM89B     | 1.169459282  | 0.1319522    | -0.119335002 | 0.251287202  | 0.999933887 | 0.247245192  | -0.455877809 | 0.703123001  | 0.025907486 |
| ENSG0000000227502 | MROCK1     | 2.482655805  | -0.036971025 | -0.053111843 | 0.016140817  | 0.999933887 | 0.841189536  | -1.446872428 | -0.605682892 | 0.025907486 |
| ENSG000000132141  | CC7B6      | -0.201177554 | 0.005317428  | 0.186358207  | -0.181040779 | 0.999933887 | 0.136415499  | 1.052905309  | 0.196535039  | 0.025907486 |
| ENSG0000000224051 | CP7P       | 3.024324933  | 0.00708862   | 0.005591613  | 0.001497006  | 0.999933887 | -0.53060376  | -0.930373513 | 0.399769753  | 0.025930573 |
| ENSG000000179044  | EXOC3L1    | -0.214381433 | -0.097852028 | 0.091570051  | -0.189422079 | 0.999933887 | -1.080882254 | 1.559149857  | 0.026032014  | 0.026032014 |
| ENSG0000000231074 | HCG18      | 4.381739555  | 0.063537359  | 0.035003279  | 0.02853408   | 0.999933887 | 0.145869753  | 0.45530225   | -0.309432498 | 0.02607577  |
| ENSG000000072163  | LIMS2      | -0.015467429 | 0.051930046  | 0.088574169  | -0.036644123 | 0.999933887 | -0.246007841 | -1.169751623 | 0.923743782  | 0.026155447 |
| ENSG000000118454  | ANKRD13C   | 2.574310966  | -0.014943729 | 0.011404743  | -0.026348472 | 0.999933887 | -0.10913838  | 0.245136607  | -0.354274987 | 0.026253579 |
| ENSG000000139990  | DCAF5      | 5.522377349  | 0.005721116  | 0.013808126  | -0.00808701  | 0.999933887 | -0.437852177 | -0.669358515 | 0.231506338  | 0.026253579 |
| ENSG000000272084  | AL137127.1 | 1.888004171  | 0.008529295  | -0.012248455 | 0.09282415   | 0.999933887 | 0.832972639  | 1.073727784  | -0.473755145 | 0.026286115 |
| ENSG000000131669  | NINJ1      | 10.103021777 | 0.041006428  | -0.002092014 | 0.043098442  | 0.999933887 | 1.087995885  | 1.315806062  | -0.227810177 | 0.026293414 |
| ENSG000000124209  | RAB22A     | 5.745629625  | -0.053004702 | 0.021024103  | 0.049099401  | 0.999933887 | -0.180266063 | -0.016125804 | -0.164140259 | 0.026316651 |
| ENSG000000198093  | ZNF649     | 0.330717136  | 0.010278495  | -0.241823414 | 0.252101909  | 0.999933887 | 0.03804853   | 0.639460624  | -0.599655771 | 0.026316651 |
| ENSG000000071243  | ING3       | 5.490253882  | -0.023889175 | -0.054958687 | 0.031069512  | 0.999933887 | 0.413601964  | 0.690553763  | -0.276951799 | 0.026343673 |
| ENSG000000102974  | CTCF       | 4.913413067  | -0.082976308 | -0.015175104 | -0.067801204 | 0.999933887 | -0.382114775 | -0.661204919 | 0.279090144  | 0.02644315  |
| ENSG0000000262884 | AC015921.1 | -1.048490788 | 0.043664211  | 0.052605055  | -0.008940844 | 0.999933887 | -0.537573753 | -1.952912812 | 1.41533906   | 0.02644315  |
| ENSG000000107021  | TBC1D13    | 3.741818305  | -0.023407089 | 0.026295925  | 0.00288835   | 0.999933887 | -0.347592589 | -0.652061348 | 0.304688759  | 0.026472065 |
| ENSG0000000247081 | BALC-AS1   | 0.601122028  | -0.500550673 | 0.232060799  | -0.732611472 | 0.999933887 | 1.90344695   | 2.750698431  | -0.847251481 | 0           |



































































































































|                  |            |              |               |               |              |             |              |               |              |             |
|------------------|------------|--------------|---------------|---------------|--------------|-------------|--------------|---------------|--------------|-------------|
| ENSG00000229619  | MBNL1-AS1  | 0.584555836  | -0.103872184  | 0.007375741   | -0.111247924 | 0.999933887 | 0.111504863  | -0.16220289   | 0.273707753  | 0.597662867 |
| ENSG00000132763  | MMACHC     | 0.389583511  | -0.408938396  | -0.223641489  | -0.185296906 | 0.999933887 | 0.329821236  | 0.551637746   | -0.22235651  | 0.597806778 |
| ENSG00000206013  | IFITM5     | 0.043673938  | 0.278066364   | 0.066646844   | 0.21141952   | 0.999933887 | 0.171967391  | -0.082208566  | 0.254175977  | 0.597827103 |
| ENSG00000113360  | DROSHA     | 2.468498638  | 0.058020862   | -0.025639872  | 0.083660733  | 0.999933887 | -0.082108017 | 0.013950572   | -0.09605859  | 0.597827103 |
| ENSG00000162714  | ZNF496     | 2.499821597  | -0.081649589  | 0.104575724   | -0.186225313 | 0.999933887 | 0.095767652  | -0.015781615  | 0.111549267  | 0.597989847 |
| ENSG00000114473  | IQCC       | 1.078045364  | 0.090785263   | 0.004795729   | 0.082849554  | 0.999933887 | 0.391312986  | -0.540686341  | -0.149373355 | 0.597989847 |
| ENSG00000239213  | NCK1-DT    | -0.175374478 | -0.056546771  | 0.041723213   | -0.098269984 | 0.999933887 | -0.209136733 | -0.436061734  | 0.226925001  | 0.597989847 |
| ENSG00000129682  | FGF13      | 2.542207022  | 0.168967604   | 0.306507753   | -0.137540149 | 0.999933887 | 0.323628768  | 0.158444728   | 0.16518404   | 0.598123738 |
| ENSG00000122406  | RPL5       | 7.118425146  | -0.032220479  | -0.147972158  | 0.115751679  | 0.999933887 | 0.091654549  | 0.162810881   | -0.071156332 | 0.598123738 |
| ENSG00000289858  | EGLN2      | 5.671420359  | 0.01197041    | 0.012126129   | -0.000155719 | 0.999933887 | 0.011996593  | 0.083787962   | -0.071791368 | 0.598123738 |
| ENSG00000260942  | CAPN10-DT  | 1.499479003  | -0.259081527  | -0.18990305   | -0.069178477 | 0.999933887 | -0.007918699 | -0.192521202  | 0.184602503  | 0.598163741 |
| ENSG00000182872  | RBM10      | 5.336057943  | 0.067196224   | 0.041781505   | 0.025414719  | 0.999933887 | -0.001710483 | -0.060733438  | 0.059022955  | 0.598163741 |
| ENSG00000091947  | TMEM101    | 1.717714665  | -0.110406169  | -0.18597119   | 0.075565021  | 0.999933887 | -0.300990718 | -0.444288046  | 0.143297328  | 0.598163741 |
| ENSG00000131634  | TMEM204    | 1.941605226  | 0.028855758   | 0.011093011   | 0.017765447  | 0.999933887 | 0.07163282   | -0.048603564  | 0.120236384  | 0.598163741 |
| ENSG00000227920  | AL353597.1 | -1.41249047  | 0.040217228   | 0.506697488   | -0.466480261 | 0.999933887 | 0.232006627  | -0.063658908  | 0.295665536  | 0.598163741 |
| ENSG00000137944  | KYAT3      | 3.426163716  | -0.134234221  | -0.027957018  | -0.106277203 | 0.999933887 | -0.021432578 | 0.057504106   | -0.078936684 | 0.5983948   |
| ENSG00000267174  | AC011472.2 | 0.869705872  | 0.126039404   | 0.092788218   | 0.033251186  | 0.999933887 | -0.220881804 | -0.46073367   | 0.239851866  | 0.598812188 |
| ENSG00000113391  | FAM172A    | 3.511696195  | -0.015315673  | 0.0347113051  | -0.050028724 | 0.999933887 | -0.092167228 | 0.000988526   | 0.293155754  | 0.598812188 |
| ENSG00000182544  | MFS05      | 4.138942983  | -0.01115666   | -0.080593636  | 0.069436976  | 0.999933887 | -0.142336027 | -0.052662423  | -0.089673604 | 0.598812188 |
| ENSG00000100614  | PPM1A      | 6.764061706  | -0.044798165  | -0.0634312591 | -0.001185574 | 0.999933887 | -0.446473477 | -0.072026366  | 0.598818577  | 0.598818577 |
| ENSG00000176624  | MEX3C      | 4.360364877  | 0.03800033    | 0.028483593   | 0.095916738  | 0.999933887 | -0.12318459  | -0.201290749  | 0.078106159  | 0.598818577 |
| ENSG00000137103  | TMEM8B     | 0.601017758  | -0.067589983  | -0.0896321    | 0.022042118  | 0.999933887 | 0.048920276  | 0.131866514   | -0.18078679  | 0.598818577 |
| ENSG00000123064  | DDX54      | 3.507821471  | 0.041289521   | 0.13721957    | -0.09593005  | 0.999933887 | 0.128929847  | 0.219923273   | -0.090993426 | 0.599117516 |
| ENSG00000086062  | B4GALT1    | 7.148622443  | -0.050656993  | -0.007320866  | -0.043336126 | 0.999933887 | 0.944170985  | 1.04321597    | -0.099044985 | 0.599293241 |
| ENSG00000026952  | AL117336.1 | 1.096836808  | 0.046708264   | 0.2012059     | -0.154497636 | 0.999933887 | 0.326267526  | -0.570811745  | -0.244544219 | 0.599420618 |
| ENSG00000258571  | PTTG4P     | -0.064779886 | -0.016297793  | -0.09000194   | 0.073704147  | 0.999933887 | -0.608796478 | -0.26131363   | -0.347482848 | 0.599420618 |
| ENSG00000157483  | MYO1E      | 0.348635495  | -0.065066758  | 0.116188537   | -0.181255295 | 0.999933887 | -0.361203985 | -0.201598251  | -0.159605734 | 0.599434099 |
| ENSG00000106701  | FSD1L      | -0.418197812 | -0.0263889794 | 0.021212775   | -0.075102569 | 0.999933887 | -0.680178198 | -0.450814275  | -0.229363922 | 0.599434099 |
| ENSG00000178814  | OLAHA      | 3.61464313   | 0.053813328   | 0.086486073   | -0.099555745 | 0.999933887 | 0.201783938  | 0.101056395   | 0.100727543  | 0.599436077 |
| ENSG00000171150  | SOC35      | 2.686904781  | 0.051066085   | -0.153466266  | 0.204532351  | 0.999933887 | -0.216526565 | -0.328598583  | 0.112072018  | 0.599675964 |
| ENSG00000225611  | LINC02158  | 2.523892535  | 0.032251131   | 0.10678318    | -0.074532049 | 0.999933887 | 0.620526528  | 0.739917854   | -0.119391326 | 0.599869649 |
| ENSG00000238A10  | SLC38A10   | 5.685670794  | 0.020992544   | -0.022993743  | 0.043986288  | 0.999933887 | -0.079184617 | -0.15879689   | 0.079395072  | 0.600041958 |
| ENSG00000151719  | NBAS       | 2.584871037  | -0.004018268  | -0.05581114   | 0.051799846  | 0.999933887 | 0.083284235  | 0.224975352   | -0.141691117 | 0.600236095 |
| ENSG00000241560  | ZBTB20-AS1 | -0.978201944 | -0.023464632  | 0.373284259   | -0.396748891 | 0.999933887 | -0.010800168 | 0.444946877   | -0.455747044 | 0.600433487 |
| ENSG00000229781  | RNR3P4     | -1.298832689 | 0.212641431   | 0.003689417   | 0.208972014  | 0.999933887 | 1.850449032  | 2.212688987   | -0.353239955 | 0.600525512 |
| ENSG00000153004  | CENPH      | -0.732540254 | -0.076575974  | -0.007574934  | -0.06882104  | 0.999933887 | 0.084252154  | 0.336195302   | -0.251943148 | 0.600559409 |
| ENSG00000196735  | HLA-DQA1   | 4.230833441  | 0.026846592   | 0.096598947   | -0.089752354 | 0.999933887 | 0.171943346  | -0.126848749  | -0.256544151 | 0.600588304 |
| ENSG00000177954  | RPS27      | 8.428246257  | 0.027486848   | -0.024055591  | 0.051524399  | 0.999933887 | 0.112770562  | 0.19245751    | -0.079686954 | 0.600731387 |
| ENSG00000108582  | CPD        | 10.062907268 | -0.083857243  | -0.079786191  | -0.004071052 | 0.999933887 | 0.082153425  | 0.167206586   | -0.085053161 | 0.600959556 |
| ENSG00000249502  | AC006160.1 | 1.487007232  | 0.104280966   | -0.038024636  | 0.142305602  | 0.999933887 | 0.130816041  | 0.283165015   | -0.152348975 | 0.600959556 |
| ENSG00000231993  | EP300-AS1  | 0.748929536  | -0.02294896   | 0.147544812   | -0.170493871 | 0.999933887 | -0.184299566 | 0.04083298    | -0.225232446 | 0.600959556 |
| ENSG00000254531  | FLJ20021   | -0.110324925 | 0.070194984   | 0.241488331   | -0.171283346 | 0.999933887 | -0.143957381 | -0.378350542  | 0.234393162  | 0.601053096 |
| ENSG00000100099  | HPS4       | 4.900740224  | -0.078067841  | 0.014922704   | -0.092990545 | 0.999933887 | -0.204294774 | -0.141470798  | -0.062823975 | 0.601199109 |
| ENSG00000242802  | AP5Z1      | 8.233450047  | 0.070761228   | 0.096950088   | -0.02618886  | 0.999933887 | 0.86472608   | 0.954269689   | -0.089543789 | 0.601199109 |
| ENSG00000139354  | GAS2L3     | 0.71033557   | -0.183935908  | 0.240158603   | -0.424094511 | 0.999933887 | -0.517797451 | -0.359388672  | -0.158408778 | 0.601199109 |
| ENSG00000246263  | UBR5-AS1   | 4.260375897  | -0.005983799  | -0.086763119  | 0.08077932   | 0.999933887 | -0.471421311 | -0.379396012  | -0.092025299 | 0.601876191 |
| ENSG00000145425  | RPS3A      | 6.664855219  | -0.070684182  | -0.162305057  | 0.091620875  | 0.999933887 | 0.076518976  | 0.14472578    | -0.068206804 | 0.601944598 |
| ENSG00000174306  | ZHX3       | 0.746015738  | 0.047238421   | 0.096565742   | -0.049327322 | 0.999933887 | -0.108624658 | -0.292749217  | 0.18412456   | 0.601944598 |
| ENSG00000184182  | UBE2F      | 1.898254286  | 0.14346096    | 0.072355616   | 0.071105344  | 0.999933887 | -0.022608382 | 0.107417169   | -0.130025552 | 0.6020543   |
| ENSG00000134531  | EMP1       | 3.358989355  | -0.186530799  | -0.123947126  | -0.062583673 | 0.999933887 | -1.520181861 | -1.660124379  | 0.139942519  | 0.6020543   |
| ENSG00000090006  | LTBP4      | 4.246233589  | 0.019625761   | 0.05545575    | -0.035831809 | 0.999933887 | 0.091965485  | 0.008630687   | -0.060363687 | 0.602070109 |
| ENSG00000280347  | AC000123.3 | 1.62790738   | -0.021409027  | 0.236593456   | -0.257362484 | 0.999933887 | -0.35192353  | -0.07970033   | -0.272223199 | 0.602070109 |
| ENSG00000168393  | DTYMK      | 0.91678955   | 0.242406828   | -0.187743747  | 0.430150575  | 0.944094537 | 0.123970241  | -0.1800811057 | 0.180081298  | 0.602318429 |
| ENSG00000259556  | AC090971.3 | 0.649061984  | -0.057796995  | -0.179404803  | 0.121607808  | 0.999933887 | 0.350365129  | 0.575423352   | -0.216058224 | 0.602318429 |
| ENSG00000142544  | CTU1       | 0.952343729  | 0.01515744    | 0.227857271   | -0.21269533  | 0.999933887 | 0.005442911  | -0.143458035  | 0.148900946  | 0.602330299 |
| ENSG00000213434  | VT1BP2     | -2.983976257 | 0.277834989   | 0.34715157    | -0.069316581 | 0.999933887 | 2.053479364  | 2.32383876    | -0.270359396 | 0.602401185 |
| ENSG00000229106  | BTD6P1     | 0.856226109  | -0.246698984  | -0.016035535  | -0.230663449 | 0.999933887 | -0.113909945 | 0.039879678   | -0.153789622 | 0.60296518  |
| ENSG00000005059  | MCUB       | 3.437798905  | 0.019319702   | -0.06547222   | 0.084791922  | 0.999933887 | 0.037216937  | 0.119382704   | -0.082165767 | 0.603202521 |
| ENSG00000153561  | RNMD5A     | 7.642754499  | -0.106432196  | -0.017045072  | -0.089387124 | 0.999933887 | -0.754985601 | -0.831618126  | 0.076632525  | 0.603374504 |
| ENSG00000187555  | USP7       | 7.026176869  | -0.038148175  | -0.03366887   | -0.004483288 | 0.999933887 | 0.041221716  | 0.04736837    | -0.03736837  | 0.603374504 |
| ENSG00000243402  | AC022973.2 | 0.016946114  | 0.068197409   | 0.271200941   | -0.203003531 | 0.999933887 | -0.138938583 | 0.194993646   | -0.333932229 | 0.60375267  |
| ENSG000000044115 | CTNNA1     | 4.800197668  | -0.039433592  | -0.05682627   | 0.017392678  | 0.999933887 | -0.189305027 | -0.119065372  | -0.070239295 | 0.604037737 |
| ENSG00000204899  | MZT1       | 1.084590691  | 0.027016108   | 0.000200979   | 0.026815129  | 0.999933887 | -0.140452255 | 0.018573434   | -0.159025689 | 0.604253838 |
| ENSG00000255026  | AC136475.3 | 4.926351505  | 0.108362443   | 0.131211437   | -0.022848995 | 0.999933887 | -0.233299837 | -0.330196813  | 0.096896976  | 0.604265952 |
| ENSG00000167193  | CRK        | 6.325955665  | -0.027636821  | 0.127373392   | 0.083100572  | 0.999933887 | -0.160585372 | 0.10617532    | -0.054417841 | 0.604388135 |
| ENSG00000005020  | SKAP2      | 6.683552152  | 0.022635021   | -0.040658064  | 0.063293085  | 0.999933887 | -0.769771694 | -0.868438657  | 0.098666964  | 0.604407591 |
| ENSG00000111335  | OAS2       | 4.574813922  | -0.018531954  | -0.032766881  | 0.014234928  | 0.999933887 | -0.265009373 | -0.348727652  | 0.083718279  | 0.604407591 |
| ENSG00000116285  | ERRF1      | 0.474112318  | 0.036037651   | 0.099726376   | -0.063688726 | 0.999933887 | -0.403910198 | -0.649258981  | 0.245348783  | 0.604407591 |
| ENSG00000139546  | TARBP2     | 1.963220239  | 0.03029257    | 0.060650213   | -0.057820956 | 0.999933887 | -0.279072586 | -0.413779238  | 0.131706652  | 0.604407591 |
| ENSG00000134198  | TSPAN2     | 3.968371707  | -0.036840103  | -0.102515161  | 0.065675058  | 0.999933887 | 0.010766843  | -0.11903305   | -0.108571462 | 0.604796361 |
| ENSG00000115365  | LANCL1     | 2.256438385  | -0.113351013  | -0.070145313  | -0.0432057   | 0.999933887 | -0.016862819 | 0.10055888    | -0.11744870  |             |





|                  |            |              |              |              |              |             |              |              |              |             |
|------------------|------------|--------------|--------------|--------------|--------------|-------------|--------------|--------------|--------------|-------------|
| ENSG000000254093 | PINX1      | 0.244112806  | 0.086229467  | 0.116181564  | -0.029952097 | 0.999933887 | 0.278841051  | 0.500420358  | -0.221579308 | 0.624679278 |
| ENSG000000225921 | NOL7       | 3.636033594  | 0.034164002  | 0.022286682  | 0.011877321  | 0.999933887 | 0.023297715  | 0.103451057  | -0.080157392 | 0.624679278 |
| ENSG000000164674 | SYTL3      | 4.44502437   | 0.003932112  | 0.016876984  | -0.012944872 | 0.999933887 | 0.096485252  | 0.013185326  | 0.083299926  | 0.624679278 |
| ENSG000000251634 | NAIPPA     | -0.769956085 | 0.22765578   | -0.215140662 | 0.442796442  | 0.999933887 | -0.744377015 | -1.111975634 | 0.367598619  | 0.624792121 |
| ENSG000000170471 | RALGAPB    | 6.082829374  | -0.018117825 | -0.051889787 | 0.033771962  | 0.999933887 | -0.345518091 | -0.280283075 | -0.065235016 | 0.62487509  |
| ENSG000000135974 | C2orf49    | 3.808798658  | -0.020165022 | -0.07894094  | 0.058775918  | 0.999933887 | 0.005331208  | 0.086686546  | -0.081355338 | 0.62487509  |
| ENSG000000285667 | AC012291.3 | 0.307941624  | -0.201633012 | -0.390620301 | 0.188987289  | 0.999933887 | -0.085277425 | -0.288419932 | 0.203142506  | 0.625127847 |
| ENSG000000170074 | FAM153A    | -0.84538944  | 0.225908293  | -0.137943462 | 0.363851756  | 0.999933887 | -0.004677159 | 0.254574666  | -0.259251824 | 0.625127847 |
| ENSG000000115523 | GNLY       | 7.000830551  | -0.01098925  | -0.023236519 | 0.012267269  | 0.999933887 | 0.109664397  | 0.166106521  | -0.056442124 | 0.625127847 |
| ENSG000000228107 | AP000692.1 | -0.301209231 | -0.156203156 | 0.219028612  | -0.375229968 | 0.999933887 | -0.509444022 | -0.321921177 | -0.187522845 | 0.625133831 |
| ENSG000000100271 | TTL1       | -0.71433276  | 0.264229744  | -0.108143202 | 0.372372946  | 0.999933887 | -0.062803925 | -0.351902035 | 0.289098109  | 0.625218744 |
| ENSG000000197061 | H4C3       | -0.873871833 | -0.229947531 | -0.391118796 | 0.161171265  | 0.999933887 | -0.09152049  | -0.586155316 | 0.494634826  | 0.625218744 |
| ENSG000000250130 | GAPDHP43   | -0.05480078  | 0.161304801  | -0.157671191 | 0.318975992  | 0.999933887 | -0.313656265 | -0.572272012 | 0.258615747  | 0.625218744 |
| ENSG000000261455 | LINC01003  | 4.459576469  | 0.068395372  | 0.023195835  | 0.045199537  | 0.999933887 | 0.26888972   | 0.368022074  | -0.099132354 | 0.625218744 |
| ENSG000000159377 | PSMB4      | 6.95718056   | -0.033295839 | -0.023356849 | -0.00993899  | 0.999933887 | 0.189199974  | 0.243341835  | -0.05414186  | 0.625218744 |
| ENSG000000258352 | IFITM3P6   | 0.10539492   | 0.106456643  | -0.161428589 | 0.267885322  | 0.999933887 | -0.201408205 | -0.005111817 | -0.196296388 | 0.625218744 |
| ENSG000000115286 | NDUF57     | 1.517468544  | -0.065849358 | 0.023317964  | -0.089167322 | 0.999933887 | -0.166125441 | -0.293734002 | 0.127608561  | 0.625218744 |
| ENSG000000118762 | PKD2       | 1.634321111  | 0.062806775  | 0.062806775  | 0.071504759  | 0.999933887 | -0.111468596 | -0.265182403 | 0.153713808  | 0.625218744 |
| ENSG000000100632 | ERH        | 3.225298974  | -0.109441482 | -0.057636027 | -0.184804509 | 0.999933887 | -0.090978534 | -0.181672697 | 0.090694163  | 0.625461441 |
| ENSG000000237489 | C10orf143  | -0.054237951 | -0.204960412 | -0.140346017 | -0.064614395 | 0.999933887 | -0.226307999 | -0.029210535 | -0.198397464 | 0.625461441 |
| ENSG000000132128 | LRRCC41    | 3.381920118  | 0.082016882  | 0.005763992  | 0.076252891  | 0.999933887 | 0.026757079  | 0.098642252  | -0.071885173 | 0.62555875  |
| ENSG000000141012 | GALNS      | 5.670330832  | 0.058639513  | -0.014302133 | 0.072941646  | 0.999933887 | 0.146745841  | 0.22216377   | -0.075417929 | 0.62585404  |
| ENSG000000254649 | AP003086.2 | 0.099894104  | 0.223384259  | 0.228472959  | -0.0050887   | 0.999933887 | -0.198341101 | 0.1130256    | -0.311366701 | 0.62585404  |
| ENSG000000207870 | MIR221     | -0.372999897 | 0.12962986   | 0.029841894  | 0.099787966  | 0.999933887 | 1.275880502  | 1.56663957   | -0.290759069 | 0.62585404  |
| ENSG000000107747 | C19orf48   | 2.000733277  | 0.055062651  | -0.105908187 | 0.160970838  | 0.999933887 | 0.367083623  | 0.245465537  | 0.121618085  | 0.62585404  |
| ENSG000000137628 | DDX60      | 4.053993494  | -0.055175837 | -0.102974196 | 0.04779836   | 0.999933887 | -0.443104812 | -0.286753124 | -0.156351698 | 0.62585404  |
| ENSG000000187134 | AKR1C1     | 1.336608669  | 0.009535477  | 0.027611277  | -0.0180758   | 0.999933887 | 0.042163894  | 0.171367998  | -0.131516084 | 0.62585404  |
| ENSG000000283384 | AL138694.1 | -0.350915837 | 0.002700385  | -0.262895841 | 0.265596225  | 0.999933887 | 1.01905344   | 1.286269924  | -0.267216484 | 0.62585404  |
| ENSG000000088899 | LZT35      | 1.566234231  | 0.089823329  | 0.170342996  | -0.080519688 | 0.999933887 | 0.207855976  | 0.349783284  | -0.141927308 | 0.625889246 |
| ENSG000000121933 | TMIGD3     | 0.19044422   | 0.042910511  | -0.017277137 | 0.060187648  | 0.999933887 | -0.038910748 | -0.22131412  | 0.182403372  | 0.625889246 |
| ENSG000000166428 | PLD4       | 0.472981478  | -0.040980434 | -0.061268435 | -0.102248869 | 0.999933887 | -0.099125565 | -0.323354867 | 0.224229302  | 0.626128171 |
| ENSG000000240857 | RDH14      | 0.511077512  | -0.024011085 | -0.006308393 | -0.017702692 | 0.999933887 | 0.185677355  | 0.359959661  | -0.174279307 | 0.626210684 |
| ENSG000000214293 | APTR       | 2.160782675  | 0.079694995  | -0.018456422 | 0.098151421  | 0.999933887 | -0.318488902 | -0.425888004 | 0.107399102  | 0.62621578  |
| ENSG000000174943 | KCTD13     | 4.321269609  | 0.041962491  | 0.066753434  | -0.024790943 | 0.999933887 | 0.150247663  | 0.061078436  | 0.626424129  | 0.62621578  |
| ENSG000000144677 | CTDSPL     | 1.321946733  | 0.24044567   | 0.17059324   | 0.06985243   | 0.999933887 | 3.265901687  | 3.047311935  | 0.218589752  | 0.62673988  |
| ENSG000000247240 | UBL7-AS1   | 0.480078454  | -0.125014123 | -0.208339958 | 0.083325835  | 0.999933887 | -0.856329998 | -1.03353725  | 0.177207253  | 0.626835095 |
| ENSG000000211897 | IHG3       | 0.585752979  | 0.136377739  | -0.009107976 | 0.145485715  | 0.999933887 | -0.108278485 | -0.300455529 | 0.287162927  | 0.627162927 |
| ENSG000000173548 | SNX33      | 0.245327285  | 0.004076702  | -0.057098941 | 0.0611175643 | 0.999933887 | -0.121269364 | 0.086600588  | -0.207869952 | 0.62783298  |
| ENSG000000186638 | KIF24      | 0.35970916   | 0.203892019  | 0.299057457  | -0.095165439 | 0.999933887 | 0.206751098  | 0.430098052  | -0.223346954 | 0.628022499 |
| ENSG000000257502 | AL161421.1 | 4.02062322   | 0.079639051  | 0.085860407  | -0.006221356 | 0.999933887 | 0.083781482  | 0.179364463  | -0.095582981 | 0.628022499 |
| ENSG000000185485 | SDHAP1     | 2.740471897  | -0.064078938 | -0.008415888 | 0.072494826  | 0.999933887 | -0.068941601 | -0.10733869  | 0.101397089  | 0.628022499 |
| ENSG000000078124 | ACER3      | 2.715109286  | -0.048833121 | -0.104166488 | 0.055333368  | 0.999933887 | -0.275775527 | -0.169444379 | -0.106331147 | 0.628022499 |
| ENSG000000145996 | CDKAL1     | 1.45689748   | -0.042331015 | 0.157415689  | -0.199746704 | 0.999933887 | 0.024528283  | 0.159339499  | -0.134811216 | 0.628022499 |
| ENSG000000108370 | RGS9       | 0.299790565  | 0.018324579  | -0.187446498 | 0.192811077  | 0.999933887 | 0.143179964  | 0.333286672  | -0.190106708 | 0.628022499 |
| ENSG000000173041 | ZNF680     | -0.349070212 | -0.002565424 | -0.032974502 | 0.030409078  | 0.999933887 | -0.338978391 | -0.05766156  | -0.281316831 | 0.628022499 |
| ENSG000000169635 | HIC2       | 3.313754783  | 0.071919632  | 0.031205495  | 0.040714137  | 0.999933887 | -0.128798381 | -0.221569541 | 0.09277116   | 0.628094934 |
| ENSG000000100804 | PSMB5      | 1.8188127    | -0.030929294 | -0.233620307 | 0.202691013  | 0.999933887 | -0.204693835 | -0.30958982  | 0.105265085  | 0.628275522 |
| ENSG000000174931 | RIN1       | -0.421522791 | 0.195085461  | 0.038218641  | 0.15686682   | 0.999933887 | -0.160718207 | -0.385649095 | 0.224930889  | 0.628305183 |
| ENSG000000254420 | AP003086.1 | 0.280297118  | -0.070781361 | 0.267463375  | -0.338244736 | 0.999933887 | 0.172880289  | 0.335757314  | -0.162877025 | 0.628305183 |
| ENSG000000145723 | GIN1       | 0.466842812  | -0.167062418 | 0.06962161   | -0.236684028 | 0.999933887 | -0.413110299 | -0.280354635 | -0.132755694 | 0.628484945 |
| ENSG000000280433 | FP565260.6 | -0.766949577 | -0.056136264 | -0.056136264 | 0.020558713  | 0.999933887 | -0.271319366 | -0.461622331 | 0.190302964  | 0.628484945 |
| ENSG000000107185 | RGP1       | 4.489259581  | 0.048755425  | 0.00383771   | 0.044917715  | 0.999933887 | -0.007802838 | -0.083522705 | 0.075719867  | 0.628960316 |
| ENSG000000155906 | RWMD1      | 1.307873593  | -0.205711025 | 0.168303742  | -0.374014767 | 0.999933887 | -0.073281308 | -0.127135253 | 0.628971195  | 0.628971195 |
| ENSG000000172116 | CD8B       | 4.133070862  | 0.056049739  | -0.094809036 | 0.150858775  | 0.999933887 | 0.08204735   | 0.170612884  | -0.088555535 | 0.628971195 |
| ENSG000000204524 | ZNF805     | 2.526047118  | 0.027213692  | 0.039622944  | -0.012409252 | 0.999933887 | -0.17924452  | -0.042821239 | -0.136421239 | 0.629018829 |
| ENSG000000257446 | ZNF878     | -1.570383941 | -0.528228967 | -0.528228967 | -0.18672482  | 0.999933887 | -0.849525518 | -0.295309391 | -0.596161627 | 0.629316506 |
| ENSG000000101413 | RPRD1B     | 4.808700639  | -0.053640959 | -0.026099732 | -0.027543127 | 0.999933887 | -0.031986015 | 0.020291157  | -0.052277172 | 0.629867844 |
| ENSG000000181789 | COG1       | 5.707317276  | -0.030729803 | 0.050113816  | -0.080843619 | 0.999933887 | -0.345962745 | -0.402929943 | 0.056967198  | 0.629946049 |
| ENSG000000181982 | CCDC149    | -0.719225706 | -0.033058342 | 0.118912836  | -0.151971178 | 0.999933887 | -0.753688864 | -1.085603292 | 0.331914358  | 0.629972333 |
| ENSG000000174106 | LEM3D3     | 5.391888147  | 0.013084278  | 0.030158717  | -0.017074438 | 0.999933887 | 0.059219677  | 0.114300096  | -0.055081319 | 0.630027572 |
| ENSG000000041357 | PSMA4      | 5.454941224  | -0.052872936 | -0.119696108 | 0.066823172  | 0.999933887 | -0.026808771 | 0.032262506  | -0.059071277 | 0.630084121 |
| ENSG000000047410 | TPR        | 6.541844446  | -0.107495384 | -0.185526968 | 0.078031582  | 0.999933887 | -0.792676288 | -0.573457767 | -0.218098611 | 0.630084121 |
| ENSG000000101417 | PXMP4      | 0.259769987  | 0.068590008  | -0.048926408 | 0.117516416  | 0.999933887 | -0.107463801 | 0.031344821  | -0.138808183 | 0.630084121 |
| ENSG000000181220 | ZNF746     | 7.6497113    | 0.015844491  | 0.097011294  | -0.081166803 | 0.999933887 | -0.326082588 | -0.247512569 | -0.075870019 | 0.630084121 |
| ENSG000000259250 | AC018904.1 | -0.091056412 | -0.332869275 | -0.332869275 | 0.263672754  | 0.999933887 | -0.778848959 | -0.985025624 | 0.206176665  | 0.630114397 |
| ENSG000000244265 | SLAH2-AS1  | -0.717018133 | -0.058876176 | 0.287872777  | -0.346748952 | 0.999933887 | 0.118987281  | 0.471113476  | -0.352126215 | 0.630114397 |
| ENSG000000224914 | LINC00863  | 1.143845912  | 0.006329709  | 0.10072902   | -0.094399311 | 0.999933887 | 0.019845867  | 0.165380092  | -0.145534785 | 0.630114397 |
| ENSG000000267575 | AC006504.5 | -0.588703511 | 0.051739053  | 0.372799725  | -0.321060672 | 0.999933887 | -0.51005443  | -0.247478445 | -0.262575985 | 0.630353551 |
| ENSG000000135976 | ANKRD36    | 2.413820801  | -0.048796562 | 0.086369096  | -0.135168748 | 0.999933887 | 0.006240559  | 0.165901352  | -0.159660793 | 0.630359951 |
| ENSG000000174428 | GTF2I2RDB  | 1.425559009  | 0.070911441  | -0.028866564 | 0.099778005  | 0.999933887 | 0.128722275  | 0.29104045   | -0.162318175 | 0.630407165 |
| ENSG000          |            |              |              |              |              |             |              |              |              |             |





|                  |            |               |               |              |              |             |              |              |              |             |
|------------------|------------|---------------|---------------|--------------|--------------|-------------|--------------|--------------|--------------|-------------|
| ENSG00000236278  | PEBP1P3    | 1.503037657   | 0.100777513   | 0.318614034  | -0.21783652  | 0.999933887 | 0.467815004  | 0.70408337   | -0.236268366 | 0.649147084 |
| ENSG000000151929 | BAG3       | 2.156885687   | 0.038885826   | -0.090378664 | 0.12926449   | 0.999933887 | 0.111671813  | 0.223249234  | -0.111577421 | 0.649147084 |
| ENSG000000198546 | ZNF511     | 1.293786453   | -0.011216927  | -0.079854648 | 0.068637676  | 0.999933887 | 0.059038085  | -0.202651004 | 0.143612919  | 0.649147084 |
| ENSG00000164818  | DNAAF5     | 1.722178931   | -0.083892634  | 0.020951978  | -0.104844612 | 0.999933887 | 0.06334861   | 0.165494642  | -0.102146032 | 0.649273826 |
| ENSG00000225720  | AL031846.1 | 0.732206701   | 0.004431885   | 0.201915659  | -0.197483774 | 0.999933887 | -0.056238642 | 0.213105863  | -0.269344506 | 0.649273826 |
| ENSG000000885552 | IGSF9      | 0.359985969   | 0.266688305   | 0.277264658  | -0.010576353 | 0.999933887 | 0.586788362  | 0.920186009  | -0.333397647 | 0.649307821 |
| ENSG00000242689  | CNTF       | -0.419321377  | -0.238978626  | -0.139500059 | -0.099478617 | 0.999933887 | -0.03344826  | -0.32256624  | 0.289108363  | 0.649380513 |
| ENSG000000103191 | CDK5RAP1   | 2.510174956   | -0.040171217  | 0.009146557  | -0.049318684 | 0.999933887 | 0.055104458  | -0.038779889 | 0.093884347  | 0.649610992 |
| ENSG00000113719  | ERGIC1     | 0.890004261   | 0.012135442   | -0.004522107 | 0.016657549  | 0.999933887 | 0.216759479  | 0.271525221  | -0.054765742 | 0.649610992 |
| ENSG000000147123 | NDUFB11    | 3.473198931   | 0.06753027    | -0.030943934 | 0.098474204  | 0.999933887 | 0.156512623  | 0.057575682  | 0.089936941  | 0.649957049 |
| ENSG00000203705  | TATDN3     | 2.183750706   | -0.087165686  | -0.134809342 | 0.047643656  | 0.999933887 | -0.122616468 | -0.021558912 | -0.101057575 | 0.650077841 |
| ENSG00000259959  | AC107068.1 | 0.129016227   | -0.136357733  | -0.067573564 | -0.068784169 | 0.999933887 | -0.362179706 | -0.63615969  | 0.273979984  | 0.650077841 |
| ENSG000000196504 | PRPF40A    | 5.431111407   | -0.075037782  | -0.145624864 | 0.070587083  | 0.999933887 | -0.49691437  | -0.367040729 | -0.129873641 | 0.650077841 |
| ENSG00000146085  | MMUT       | 2.390267251   | -0.019393545  | 0.032423297  | -0.051816842 | 0.999933887 | -0.130660898 | -0.033360347 | -0.09730046  | 0.650077841 |
| ENSG000000100292 | HMOX1      | 8.57530175    | -0.024614562  | 0.007008037  | -0.031622599 | 0.999933887 | -0.800574063 | -0.654410925 | -0.146163138 | 0.650077841 |
| ENSG00000174282  | ZBTB4      | 4.18848118    | 0.08557869    | 0.082922896  | 0.002655994  | 0.999933887 | -0.001018428 | -0.073601189 | 0.072582761  | 0.65014835  |
| ENSG00000109184  | DCUN1D4    | 2.779177967   | -0.069359963  | 0.004934464  | -0.074294426 | 0.999933887 | -0.24752587  | -0.13425006  | -0.11327581  | 0.65014835  |
| ENSG00000103544  | VPS35L     | 2.845035596   | -0.056456975  | -0.0035691   | -0.052887875 | 0.999933887 | 0.002930965  | 0.088595953  | -0.056648988 | 0.650455983 |
| ENSG00000229894  | GK3P       | -0.276270321  | 0.019353838   | 0.286885138  | -0.2675313   | 0.999933887 | 0.072489003  | -0.19626224  | 0.268751246  | 0.650455983 |
| ENSG00000100079  | LGAL52     | -1.458949269  | -0.007184328  | 0.049179081  | -0.056363409 | 0.999933887 | -0.150481769 | -0.488383596 | 0.337901827  | 0.650455983 |
| ENSG00000128872  | TMOD2      | 3.384211376   | -0.002143742  | 0.072661008  | -0.07480475  | 0.999933887 | -0.199178977 | -0.102118889 | -0.097060088 | 0.650558538 |
| ENSG00000147133  | TAI1       | 5.153655437   | -0.056875103  | -0.049875337 | -0.006999766 | 0.999933887 | -0.236162339 | -0.168738928 | -0.067425412 | 0.650642339 |
| ENSG00000257365  | FNTB       | 0.672027717   | -0.004074994  | 0.142641062  | -0.146716056 | 0.999933887 | -0.756100759 | -0.922654754 | 0.186553995  | 0.650642339 |
| ENSG00000261067  | AC109460.3 | 1.002561248   | 5.3472e-05    | 0.189304727  | -0.189251255 | 0.999933887 | 0.391671213  | 0.512921048  | -0.121248875 | 0.650642339 |
| ENSG000000196118 | CCDC189    | 0.083363608   | -0.192586472  | -0.051034231 | -0.243620703 | 0.999933887 | -0.381786998 | -0.639874362 | 0.258087364  | 0.650999113 |
| ENSG000000168612 | ZSWIM1     | 2.608808814   | -0.026723172  | -0.214485945 | 0.187762773  | 0.999933887 | -0.020063275 | 0.077211291  | -0.097274566 | 0.651092178 |
| ENSG000000008300 | CELSR3     | 0.755765162   | 0.013172872   | -0.051458798 | 0.064631669  | 0.999933887 | 0.110623167  | -0.270498035 | -0.159874868 | 0.651369014 |
| ENSG00000164512  | ANKRD55    | -0.035366232  | 0.115183741   | 0.153775633  | -0.038591891 | 0.999933887 | -0.330144429 | -0.093318511 | -0.236825918 | 0.651394821 |
| ENSG00000223935  | LGALS1L-DT | 0.291278799   | 0.18081798    | -0.076735575 | 0.194817373  | 0.999933887 | -0.487287081 | -0.692452551 | -0.20516547  | 0.651470634 |
| ENSG00000004897  | CDC27      | 3.522976191   | -0.037374316  | -0.093076468 | 0.055702151  | 0.999933887 | -0.285268149 | -0.197030081 | -0.088238068 | 0.651853454 |
| ENSG00000168026  | TTC21A     | 3.245700948   | 0.175063227   | 0.260779392  | -0.085716166 | 0.999933887 | 0.027263821  | -0.100697537 | 0.127961358  | 0.651944312 |
| ENSG00000038274  | MAT2B      | 8.699903533   | -0.087024908  | -0.015344955 | -0.071679953 | 0.999933887 | -0.287844097 | -0.345003528 | 0.057159431  | 0.651944312 |
| ENSG00000266891  | AP00902.1  | 0.887095683   | -0.069545726  | 0.031497076  | -0.101402802 | 0.999933887 | -0.149704465 | 0.087969569  | -0.237674034 | 0.651944312 |
| ENSG000000164109 | MAD2L1     | -0.220557907  | -0.140638119  | -0.125039593 | -0.015598537 | 0.999933887 | 0.125703456  | -0.119480081 | 0.245183537  | 0.651944312 |
| ENSG00000100218  | RSPH14     | -1.13779651   | -0.157514909  | 0.118415467  | -0.275930376 | 0.999933887 | -0.283290371 | 0.165597624  | -0.448887995 | 0.651944312 |
| ENSG00000128050  | PAICS      | 2.317614706   | -0.057628009  | -0.100700991 | 0.133072983  | 0.999933887 | 0.077453445  | 0.169676617  | -0.092223172 | 0.651944312 |
| ENSG00000115484  | CCT4       | 3.803975425   | 0.013515139   | -0.153406486 | 0.166557835  | 0.999933887 | -0.159085798 | -0.232589628 | -0.07350383  | 0.651944312 |
| ENSG00000116151  | MORN1      | 0.12269303    | -0.001180145  | -0.055311102 | 0.054130875  | 0.999933887 | 0.037561765  | -0.117124806 | 0.154686571  | 0.651944312 |
| ENSG00000226372  | AL354836.1 | 0.632632632   | -0.052207554  | 0.164685787  | -0.217073341 | 0.999933887 | -0.096990255 | 0.035952446  | -0.132942701 | 0.651950052 |
| ENSG00000280161  | AC022413.1 | -0.63392686   | 0.255721608   | -0.171845585 | 0.427567192  | 0.999933887 | 0.703941017  | 0.937648609  | -0.233707593 | 0.651987844 |
| ENSG00000280672  | AC100827.4 | -1.302534324  | -0.052731981  | 0.243375019  | -0.296107    | 0.999933887 | 0.51742252   | -0.429169493 | 0.651987844  |             |
| ENSG00000159176  | CSRPI      | 3.631517535   | -0.036791754  | 0.012405305  | -0.049197059 | 0.999933887 | -0.096479408 | -0.180813122 | 0.084333714  | 0.652295545 |
| ENSG00000186409  | CCDC30     | 0.720236681   | -0.033102337  | 0.111238436  | -0.144340673 | 0.999933887 | -0.81324197  | -0.6201169   | -0.193125071 | 0.652295545 |
| ENSG000001124380 | SNRNP27    | 2.168743457   | -0.010470897  | 0.06519906   | -0.075669958 | 0.999933887 | 0.003316176  | -0.093371355 | -0.096397179 | 0.652316527 |
| ENSG00000100453  | GZMB       | 3.970346005   | -0.061730152  | 0.031202497  | -0.030527656 | 0.999933887 | 0.103564863  | 0.02661107   | 0.076953793  | 0.652510724 |
| ENSG00000177943  | MAMDC4     | 1.20051602    | 0.072540587   | 0.102541301  | -0.030000713 | 0.999933887 | 0.102613524  | -0.145840263 | -0.145789118 | 0.652510724 |
| ENSG00000169118  | CSNK1G1    | 3.60382041    | -0.099604591  | -0.129744702 | 0.030140111  | 0.999933887 | -0.355015127 | -0.444883154 | 0.089867987  | 0.652525561 |
| ENSG00000175063  | UBE2C      | 0.238407075   | -0.133253279  | 0.150098827  | -0.283263106 | 0.999933887 | -0.135239724 | -0.081509956 | -0.21674968  | 0.652560575 |
| ENSG00000147536  | GINS4      | 0.534137089   | 0.058777275   | 0.102093356  | -0.04331608  | 0.999933887 | 0.635181668  | 0.851670602  | -0.216488934 | 0.652739936 |
| ENSG00000260803  | ZB4723.1   | -1.717019172  | 0.016793625   | -0.411342845 | 0.42813647   | 0.999933887 | -1.399466128 | -1.693854097 | 0.294387969  | 0.65277847  |
| ENSG00000223750  | SIRPB3P    | -0.390626716  | 0.093057696   | 0.048744894  | 0.044312802  | 0.999933887 | 0.03953706   | -0.217863587 | 0.652815725  |             |
| ENSG00000166402  | TUB        | -0.503210484  | -0.039540959  | 0.003857718  | -0.043398677 | 0.999933887 | -0.108324561 | 0.141316168  | -0.249647209 | 0.652869219 |
| ENSG00000168234  | TTC39C     | 3.536130985   | -0.069146157  | 0.010428361  | -0.079574518 | 0.999933887 | 0.140904444  | -0.207028486 | -0.066124042 | 0.653016674 |
| ENSG00000198363  | ASPH       | 7.518241954   | -0.067297166  | 0.042099543  | -0.109396709 | 0.999933887 | -0.340767311 | -0.26074133  | -0.080025981 | 0.653016674 |
| ENSG00000119333  | DYNC2I2    | 0.301857918   | -0.052864246  | -0.187635137 | 0.134770891  | 0.999933887 | 0.023165176  | -0.139195357 | 0.162360713  | 0.653016674 |
| ENSG00000125249  | RAP2A      | 2.546534619   | -0.001079827  | -0.160808068 | 0.15972824   | 0.999933887 | -0.189383555 | -0.084658124 | -0.104725431 | 0.653016674 |
| ENSG00000174780  | SRP72      | 4.186330489   | -0.0471171989 | -0.138521221 | 0.091349323  | 0.999933887 | -0.047500352 | 0.031732295  | -0.079232647 | 0.653017894 |
| ENSG00000279155  | AC233300.1 | 0.272104473   | 0.012010936   | 0.010201942  | -0.020109036 | 0.999933887 | 0.078448555  | 0.211985728  | -0.133537173 | 0.653145858 |
| ENSG00000205707  | ETFRF1     | 2.013652288   | -0.053121901  | -0.094006161 | 0.40088426   | 0.999933887 | -0.026981523 | 0.109328994  | -0.136310517 | 0.653202045 |
| ENSG000000066422 | ZBTB11     | 4.690019953   | -0.039450564  | -0.150656444 | 0.11120558   | 0.999933887 | -0.225827495 | -0.083547664 | -0.142279832 | 0.653202045 |
| ENSG00000226380  | AC016831.1 | 5.281532819   | 0.112768884   | 0.093709238  | 0.019059646  | 0.999933887 | 1.097285216  | 1.22163647   | -0.124351254 | 0.653244526 |
| ENSG00000119801  | YPEL5      | 9.556938214   | -0.007930418  | -0.086525059 | 0.060594641  | 0.999933887 | -0.194295902 | -0.143952595 | -0.050343307 | 0.653244526 |
| ENSG00000164168  | TMEM184C   | 3.968677105   | 0.16443832    | -0.152637423 | 0.169081255  | 0.999933887 | -0.29887393  | -0.389716074 | -0.090842144 | 0.653471715 |
| ENSG00000115641  | FHL2       | -0.130955886  | 0.026007129   | -0.100096994 | 0.126016823  | 0.999933887 | -0.109180039 | 0.093652977  | -0.202833016 | 0.653696064 |
| ENSG000000805465 | OVGPI1     | -0.18370849   | 0.066755033   | 0.252771092  | -0.190516059 | 0.999933887 | -0.020239055 | -0.231265954 | 0.211026899  | 0.653931093 |
| ENSG00000166579  | NDEL1      | 7.612622275   | 0.064259259   | 0.040312546  | 0.023946713  | 0.999933887 | -0.519894691 | -0.057769061 | 0.057795919  | 0.654164192 |
| ENSG00000231128  | AL137856.1 | -0.1621881791 | 0.238804122   | 0.116781264  | 0.122042857  | 0.999933887 | -0.119056153 | 0.22230881   | -0.341364963 | 0.654164192 |
| ENSG00000075188  | NUP37      | 0.200048938   | -0.140091507  | -0.180438186 | 0.040346679  | 0.999933887 | -0.218442946 | -0.043774266 | -0.17468868  | 0.654519161 |
| ENSG00000035862  | TIMP2      | 7.264975449   | 0.013201194   | 0.011141937  | 0.002059257  | 0.999933887 | -1.334552095 | -1.433465222 | 0.098913128  | 0.654552881 |
| ENSG00000129422  | MTUS1      | -0.905956295  | -0.18630146   | -0.104146874 | -0.082154587 | 0.999933887 | -0.208039319 | -0.250964796 | 0.654641413  |             |
| ENSG00000261490  | AC005674.1 | 4.165006299   | -0.109684498  | 0.007684992  | -0.032915506 | 0.999933887 | -0.121955522 | -0.209293719 | 0.087338197  | 0.6547313   |

















|                 |            |              |              |              |              |             |              |              |              |             |
|-----------------|------------|--------------|--------------|--------------|--------------|-------------|--------------|--------------|--------------|-------------|
| ENSG00000144659 | SLC25A38   | 3.29167427   | -0.028617754 | -0.114556872 | 0.085939117  | 0.999933887 | 0.153340347  | 0.217019833  | -0.063679487 | 0.719471625 |
| ENSG00000170145 | SIK2       | 3.377472042  | -0.010482251 | 0.006234602  | -0.016716853 | 0.999933887 | -0.026320331 | 0.035846811  | -0.062167142 | 0.719471625 |
| ENSG00000174547 | MRPL11     | 1.393919376  | 0.055573643  | 0.029265487  | 0.026308156  | 0.999933887 | 0.157428702  | 0.03900243   | 0.118426272  | 0.720039791 |
| ENSG00000256987 | AC023050.5 | 1.259813475  | -0.081266331 | 0.030323267  | -0.111589597 | 0.999933887 | -0.011498175 | 0.159228084  | -0.170726259 | 0.720150793 |
| ENSG00000136206 | SPDYE1     | 0.014937352  | -0.086206502 | -0.133815574 | 0.047609073  | 0.999933887 | 0.023325009  | 0.193855583  | -0.170530821 | 0.720487228 |
| ENSG00000115758 | ODC1       | 5.463890749  | -0.00400753  | -0.023135635 | 0.019128305  | 0.999933887 | 0.141087986  | 0.194448392  | -0.053360406 | 0.720495923 |
| ENSG00000273702 | AC091271.1 | 2.409291301  | 0.22777614   | 0.11534288   | 0.11242786   | 0.999933887 | 0.736459346  | 0.833175643  | -0.096716497 | 0.720998031 |
| ENSG00000183624 | HMCES      | 4.892282401  | 0.061466195  | -0.039141948 | 0.100608143  | 0.999933887 | -0.111210853 | 0.055832634  | -0.05584513  | 0.720998031 |
| ENSG00000228264 | PSMD8P1    | 1.429408515  | 0.142609899  | 0.099963037  | 0.004764682  | 0.999933887 | 0.858608431  | 1.03851479   | -0.179906359 | 0.720998031 |
| ENSG00000186854 | TRABD2A    | 2.631552551  | 0.047099742  | 0.054746981  | -0.007647238 | 0.999933887 | 0.051276708  | 0.009215548  | 0.060492257  | 0.720998031 |
| ENSG00000138131 | LOXL4      | -0.780620559 | 0.115095557  | 0.067047341  | 0.048048215  | 0.999933887 | 0.121721331  | -0.107026971 | 0.228748302  | 0.720998031 |
| ENSG00000277879 | AL391988.1 | 0.7218305    | -0.068899634 | -0.103519124 | 0.03461949   | 0.999933887 | -0.316622078 | -0.524835798 | 0.20821372   | 0.720998031 |
| ENSG00000008083 | JARID2     | 8.29506645   | -0.028197648 | 0.031036346  | -0.059233994 | 0.999933887 | -0.319219877 | -0.041603451 | 0.720998031  |             |
| ENSG00000249790 | AC092490.1 | -1.290004301 | 0.061337107  | -0.249037452 | 0.310374559  | 0.999933887 | -0.731935849 | -0.518428958 | -0.213506891 | 0.720998031 |
| ENSG00000185436 | IFNLR1     | 0.625844193  | -0.023134025 | -0.11774715  | 0.094613125  | 0.999933887 | 0.238288353  | 0.124481716  | 0.113806593  | 0.720998031 |
| ENSG00000259207 | ITGB3      | -1.038186922 | -0.042546423 | -0.145581507 | 0.103035083  | 0.999933887 | -0.508922039 | -0.245668018 | -0.263254022 | 0.720998031 |
| ENSG00000253948 | VPS13B-DT  | 0.217786323  | 0.014569645  | 0.054819819  | -0.040250174 | 0.999933887 | -0.122502759 | 0.081719768  | -0.204222527 | 0.720998031 |
| ENSG00000173744 | AGFG1      | 5.773051851  | -0.000357624 | 0.026670604  | 0.026670604  | 0.999933887 | -0.175685872 | -0.130683226 | -0.045002646 | 0.720998031 |
| ENSG00000227039 | ITGB2-AS1  | 5.170472667  | 0.020660822  | 0.0181417    | 0.002519123  | 0.999933887 | 0.215741035  | 0.267668593  | -0.051927559 | 0.721243048 |
| ENSG00000141447 | OSBPL1A    | 2.843187851  | -0.002094579 | 0.045747608  | -0.047570677 | 0.999933887 | 0.062234579  | 0.087100839  | 0.721379435  |             |
| ENSG00000120885 | CLU        | 1.118689784  | -0.04643479  | -0.075741062 | 0.029306272  | 0.999933887 | -0.089810997 | 0.0591688    | -0.148979797 | 0.721437778 |
| ENSG00000107874 | CUEDC2     | 2.806493183  | 0.025862498  | -0.022447388 | 0.048309886  | 0.999933887 | 0.189298258  | -0.091225916 | 0.081927858  | 0.721686147 |
| ENSG00000197892 | KIF13B     | 3.482458475  | -0.070841056 | 0.000852897  | -0.071693953 | 0.999933887 | 0.049069212  | -0.004908773 | 0.053977985  | 0.721798134 |
| ENSG00000163214 | DHX57      | 1.065748398  | -0.069094058 | 0.116182586  | -0.185276645 | 0.999933887 | -0.129317975 | -0.000964964 | -0.128353011 | 0.721798134 |
| ENSG00000174611 | KY         | 7.8563388323 | 0.104851768  | 0.141572441  | -0.036722653 | 0.999933887 | 0.163483037  | 0.228574318  | -0.065091281 | 0.721921655 |
| ENSG00000177380 | PPIA3      | -0.635256808 | -0.10479743  | -0.04791257  | -0.05688486  | 0.999933887 | 0.025221049  | -0.17210958  | 0.197330628  | 0.721921655 |
| ENSG00000226660 | TRBV2      | 0.650520428  | -0.084020564 | -0.118996973 | 0.034976408  | 0.999933887 | 0.020494625  | 0.135223055  | -0.11472843  | 0.722053337 |
| ENSG00000154165 | GPR15      | 1.442777815  | -0.078093313 | -0.010741035 | -0.067352278 | 0.999933887 | 0.204631015  | 0.089289871  | 0.115341144  | 0.722053337 |
| ENSG00000180189 | HMBG1P1A   | 0.587194416  | 0.063819603  | 0.058419979  | 0.005399624  | 0.999933887 | 0.222815476  | 0.395407065  | -0.172591159 | 0.722166577 |
| ENSG00000079785 | DDX1       | 2.547291043  | -0.057204131 | -0.09887709  | 0.041672959  | 0.999933887 | 0.093370279  | 0.00880047   | 0.084569808  | 0.722314013 |
| ENSG00000093183 | SEC22C     | 4.131481887  | -0.056251256 | 0.024443992  | -0.080695248 | 0.999933887 | -0.045038844 | -0.098618845 | 0.053580001  | 0.722677185 |
| ENSG00000107959 | PITRM1     | 3.897068586  | -0.02566402  | 0.121504607  | -0.147168627 | 0.999933887 | 0.003476118  | 0.066801753  | -0.063325635 | 0.722677185 |
| ENSG00000119318 | RAD23B     | 6.679208385  | 0.008677147  | 0.004753811  | 0.003923337  | 0.999933887 | -0.336423586 | -0.295856662 | -0.040566934 | 0.722677185 |
| ENSG00000105329 | TGFB1      | 8.590452757  | 0.026302139  | 0.016528767  | 0.009773383  | 0.999933887 | -0.2447255   | -0.304722604 | 0.059997104  | 0.722832028 |
| ENSG00000089157 | RPLP0      | 7.48249216   | -0.002317327 | -0.040357203 | 0.038039876  | 0.999933887 | 0.131137736  | 0.182929741  | -0.051792005 | 0.723093989 |
| ENSG00000001460 | STPG1      | -0.490226796 | -0.199532581 | -0.314379387 | 0.114846807  | 0.999933887 | -0.146837905 | 0.044260182  | -0.191098087 | 0.723275948 |
| ENSG00000204642 | HLA-F      | 8.800286993  | 0.075294614  | 0.037822003  | 0.037474551  | 0.999933887 | 0.818450137  | 0.871035919  | -0.052585782 | 0.723546784 |
| ENSG00000116251 | RPL22      | 3.733343003  | -0.017570969 | -0.110953682 | 0.093382713  | 0.999933887 | 0.084454728  | 0.155139693  | 0.077068496  | 0.723546784 |
| ENSG00000161298 | ZNF382     | -0.101014963 | -0.004433554 | -0.0936155   | 0.089181946  | 0.999933887 | -0.20562411  | 0.179190551  | 0.723546784  |             |
| ENSG00000206690 | AC061992.2 | 1.454127587  | 0.188130109  | 0.260030688  | -0.071900579 | 0.999933887 | 0.360897532  | 0.49856142   | -0.137663889 | 0.723582544 |
| ENSG00000167037 | SGSM1      | -0.650701097 | 0.106040107  | -0.071182232 | 0.177266249  | 0.999933887 | -0.065733474 | 0.132753972  | -0.198487446 | 0.723582544 |
| ENSG00000177628 | GBA        | 6.259669333  | 0.025159348  | -0.075214211 | 0.10037356   | 0.999933887 | -0.515790658 | -0.574841915 | 0.059051257  | 0.723582544 |
| ENSG00000235618 | FAM21EP    | 0.237599523  | -0.055478847 | -0.036333822 | -0.019145025 | 0.999933887 | 0.376494913  | 0.511394585  | -0.134899671 | 0.723582544 |
| ENSG00000237541 | HLA-DQA2   | 0.429479265  | -0.033805861 | 0.197461343  | -0.231267204 | 0.999933887 | 0.730602817  | 0.894141502  | -0.163536865 | 0.723582544 |
| ENSG00000136243 | NUP42      | 1.441974814  | -0.019297524 | -0.000829919 | -0.018467605 | 0.999933887 | -0.267623421 | -0.379484577 | 0.112325126  | 0.72358557  |
| ENSG00000115364 | MRPL19     | 1.033618745  | -0.110806869 | -0.129687202 | 0.018878613  | 0.999933887 | 0.164704696  | 0.279040947  | -0.114336281 | 0.72366304  |
| ENSG00000154760 | SLFN13     | 3.645254113  | -0.004930104 | -0.042854089 | 0.037923985  | 0.999933887 | -0.141993078 | -0.082403274 | -0.059589804 | 0.724121613 |
| ENSG00000106244 | PDAP1      | 5.368198945  | 1.17296-05   | -0.016253433 | 0.016265162  | 0.999933887 | 0.035783849  | -0.01084914  | 0.046632989  | 0.724255343 |
| ENSG00000120262 | CCDC170    | 0.81399594   | 0.134168278  | -0.216762878 | 0.350931157  | 0.944094537 | -0.059968595 | 0.099269902  | -0.159236497 | 0.724511441 |
| ENSG00000215193 | PEX26      | 3.46780992   | -0.01402814  | -0.005200216 | -0.008827923 | 0.999933887 | -0.128592504 | -0.18563538  | 0.057043334  | 0.724587559 |
| ENSG00000143553 | LYPLAL1    | 2.004802401  | -0.187351041 | -0.013684215 | -0.173668626 | 0.999933887 | -0.923710065 | -1.019513558 | 0.095803293  | 0.724645386 |
| ENSG00000117305 | HMGCL      | 3.447739872  | 0.071698847  | -0.009256969 | 0.080955816  | 0.999933887 | -0.356272068 | -0.268981605 | -0.069290464 | 0.724645386 |
| ENSG00000056736 | IL17RB     | -0.927103605 | 0.016645956  | 0.493546377  | -0.476900422 | 0.999933887 | 0.384917488  | 0.205953637  | 0.178964181  | 0.724645386 |
| ENSG00000081692 | JMJD4      | -0.738820978 | 0.190038956  | 0.063282645  | 0.12677431   | 0.999933887 | 0.228491947  | 0.427745787  | -0.199253839 | 0.724791677 |
| ENSG00000119392 | GLE1       | 4.056491576  | -0.014837251 | 0.044428769  | -0.059266019 | 0.999933887 | -0.379855132 | -0.437068594 | 0.057751462  | 0.724791677 |
| ENSG00000107371 | EXOSC3     | 1.797221233  | -0.179876249 | -0.00195033  | -0.177925919 | 0.999933887 | -0.289998875 | -0.193711918 | -0.096286958 | 0.724951617 |
| ENSG00000236609 | ZNF853     | 0.72596596   | 0.091876903  | -0.055683243 | 0.147460147  | 0.999933887 | -0.021237734 | -0.128203693 | 0.106965958  | 0.724966782 |
| ENSG00000259476 | AC018904.2 | 1.772617384  | 0.281595965  | -0.124209596 | -0.139249901 | 0.999933887 | 0.802657277  | 0.943774401  | -0.141171724 | 0.72502786  |
| ENSG00000165548 | TMEM63C    | 0.375333353  | 0.085157672  | -0.067868234 | 0.153025906  | 0.999933887 | -0.276438838 | -0.445196874 | 0.168758035  | 0.72502786  |
| ENSG00000069248 | NUP133     | 3.545795198  | -0.020912786 | -0.016816141 | -0.004096646 | 0.999933887 | -0.102698733 | -0.068825237 | 0.72502786   |             |
| ENSG00000228474 | OST4       | 4.419979283  | 0.016315927  | -0.049938844 | 0.06625477   | 0.999933887 | 0.094763724  | 0.041987041  | 0.052776683  | 0.72502786  |
| ENSG00000204438 | GPANK1     | 3.814709772  | -0.003004692 | 0.093269377  | -0.096274068 | 0.999933887 | -0.371970197 | -0.445613538 | 0.073643341  | 0.72502786  |
| ENSG00000137207 | YIPF3      | 6.745971581  | -0.051734993 | -0.094879839 | 0.043144846  | 0.999933887 | -0.190100622 | -0.146039312 | -0.04406131  | 0.725256521 |
| ENSG00000148337 | CIZ1       | 4.257051601  | 0.034357455  | -0.020421008 | 0.054778462  | 0.999933887 | 0.097821302  | 0.151974769  | -0.054153467 | 0.725421435 |
| ENSG00000143870 | PDIA6      | 3.773972494  | -0.040044127 | -0.093375107 | 0.05333098   | 0.999933887 | 0.018164152  | 0.041580446  | 0.059744598  | 0.725464872 |
| ENSG00000117751 | PPIP1R8    | 3.043806197  | -0.050948045 | -0.076293715 | 0.02534567   | 0.999933887 | 0.012859782  | -0.056291208 | 0.06915105   | 0.725464872 |
| ENSG00000063601 | MTMR1      | 4.70816589   | 0.015574163  | 0.013732086  | 0.001842077  | 0.999933887 | -0.118735452 | -0.174439068 | 0.055703634  | 0.725464872 |
| ENSG00000160087 | UBE2J2     | 5.501623059  | -0.000999235 | -0.068480239 | 0.067481004  | 0.999933887 | -0.121994491 | -0.079084299 | -0.042910192 | 0.725464872 |
| ENSG00000280326 | AC067931.2 | -0.115262023 | -0.005211833 | -0.001358687 | -0.000753146 | 0.999933887 | 0.836879466  | 1.026727828  | -0.189848362 | 0.725464872 |
| ENSG00000268223 | AC127521.1 | -0.351608402 | 0.092177776  | -0.131582064 | 0.22679984   | 0.999933887 | -0.081661203 | -0.244581038 | 0.164149336  | 0.725584758 |
| ENSG00000108559 | NUP88      | 3.079617464  | -0.017426463 | -0.173150459 | 0.155723997  | 0.999933887 | 0.151966969  | 0.213412277  | -0.061175309 | 0.725584758 |
| ENSG00000067601 | PMS2P4     |              |              |              |              |             |              |              |              |             |















|                  |            |              |              |              |              |             |              |              |              |             |
|------------------|------------|--------------|--------------|--------------|--------------|-------------|--------------|--------------|--------------|-------------|
| ENSG00000162065  | TBC1D24    | 1.035425485  | -0.021927824 | -0.135576779 | 0.113648955  | 0.999933887 | 0.004012015  | -0.07738639  | 0.081398405  | 0.787392875 |
| ENSG00000131401  | NAPS5B     | -0.555521928 | 0.115173806  | -0.152399025 | 0.267572831  | 0.999933887 | -0.216366992 | -0.075399876 | -0.140967116 | 0.78748315  |
| ENSG00000102316  | MAGED2     | 3.54431536   | 0.01869578   | 0.009374834  | 0.009320946  | 0.999933887 | 0.127441872  | 0.076053948  | 0.051387924  | 0.78748315  |
| ENSG00000198931  | APRT       | 3.705450256  | 0.084507494  | 0.011619432  | 0.072888062  | 0.999933887 | 0.107974025  | 0.057886598  | 0.050087428  | 0.787570852 |
| ENSG00000126388  | NR1D1      | 6.088687419  | 0.024399258  | 0.114854422  | -0.090455164 | 0.999933887 | 1.163116304  | 1.227472807  | -0.064356503 | 0.787766503 |
| ENSG00000132535  | DLG4       | 0.824699999  | -0.064707277 | 0.130294232  | -0.195001509 | 0.999933887 | -0.061361343 | 0.034731841  | -0.096093184 | 0.788016404 |
| ENSG00000117394  | SLC2A1     | 4.878690898  | 0.001174931  | 0.047478847  | -0.046303917 | 0.999933887 | -0.396469526 | -0.339683806 | -0.05688572  | 0.788636929 |
| ENSG00000236682  | MAP3K2-DT  | 3.156994151  | -0.065809989 | 0.043934462  | -0.109744451 | 0.999933887 | -0.744737094 | -0.683768239 | -0.060968855 | 0.788881431 |
| ENSG00000169442  | CD52       | 4.798565273  | -0.011321003 | -0.042752505 | 0.031431502  | 0.999933887 | 0.059557932  | 0.00737995   | 0.052177982  | 0.788881431 |
| ENSG000002025800 | KPNA6      | 5.07822038   | -0.017506794 | -0.020387809 | 0.002891016  | 0.999933887 | -0.266317552 | -0.307261807 | -0.040944255 | 0.78890607  |
| ENSG00000104823  | ECH1       | 2.638673146  | -0.033167739 | 0.07589327   | -0.10906101  | 0.999933887 | 0.068099555  | 0.123330224  | -0.055230669 | 0.789026724 |
| ENSG00000248092  | NNT-AS1    | -0.325803716 | -0.324725759 | -0.570698724 | 0.245972965  | 0.999933887 | -0.198055537 | -0.081456291 | -0.116599245 | 0.789080675 |
| ENSG00000125901  | MRPS26     | 1.364744243  | 0.144673637  | 0.146752707  | -0.00207907  | 0.999933887 | 0.043360329  | -0.046394552 | 0.089754881  | 0.789080675 |
| ENSG00000102779  | ALOX5      | 7.565188602  | 0.045358578  | 0.025715879  | 0.019642699  | 0.999933887 | 0.122680278  | 0.160447976  | -0.038187698 | 0.789080675 |
| ENSG00000136938  | ANP32B     | 5.192782372  | -0.047706402 | -0.039168794 | -0.008537608 | 0.999933887 | -0.038693643 | 0.000961184  | -0.039654828 | 0.789080675 |
| ENSG00000214176  | PLEKHM1P1  | 6.58890235   | 0.034684024  | 0.014964832  | 0.019719192  | 0.999933887 | -0.194947661 | -0.225682364 | 0.030734703  | 0.789080675 |
| ENSG00000168781  | PIPF5K1    | 0.65949413   | 0.101624576  | -0.0963621   | 0.197986676  | 0.999933887 | 0.145945892  | 0.235702209  | -0.089756317 | 0.789080675 |
| ENSG00000166793  | YPEL4      | 0.961336558  | 0.109204843  | 0.109269649  | 0.188831792  | 0.999933887 | -0.871231213 | -0.976263314 | -0.105031901 | 0.789080675 |
| ENSG00000215424  | MCM3AP-AS1 | 7.38562067   | -0.071564541 | 0.170829691  | -0.242394232 | 0.999933887 | 0.133100956  | 0.226435734  | -0.093334778 | 0.789080675 |
| ENSG00000080605  | CHMP5      | 5.07077414   | 0.013654222  | 0.009846365  | 0.003807857  | 0.999933887 | 0.063787047  | 0.099734554  | -0.035947507 | 0.789080675 |
| ENSG00000104331  | BPNT2      | 3.481339359  | 6.2674e-05   | 0.04053017   | -0.040467496 | 0.999933887 | -0.256376125 | -0.3095479   | 0.053171774  | 0.789080675 |
| ENSG00000136826  | KLF4       | 5.171002304  | 0.208727129  | 0.242373532  | -0.033646403 | 0.999933887 | -0.074978985 | -0.405728516 | -0.074971335 | 0.789189009 |
| ENSG000002286813 | AC015871.6 | 2.210246662  | 0.109705053  | 0.278992701  | -0.169287648 | 0.999933887 | 0.534805281  | 0.633372792  | -0.098567511 | 0.789189009 |
| ENSG000002024112 | YAE1       | -1.226930791 | -0.083549903 | -0.370926059 | 0.287376156  | 0.999933887 | -0.123064114 | 0.045559129  | -0.168623243 | 0.789309565 |
| ENSG00000158023  | CFAP251    | -0.249726796 | 0.237168451  | -0.194253352 | 0.431421803  | 0.999933887 | -0.401620159 | -0.241727266 | -0.159892893 | 0.789385287 |
| ENSG00000114656  | CFAP92     | 3.323893374  | 0.05741192   | 0.096331298  | -0.038919379 | 0.999933887 | 0.127498632  | 0.073191613  | 0.054307019  | 0.789385287 |
| ENSG00000245213  | AC105285.1 | 0.062114374  | 0.263051534  | -0.222604171 | 0.999933887  | 0.203017611 | 0.203017611  | 0.130992751  | 0.789385287  |             |
| ENSG00000289821  | KCNQ1OT1   | 3.567711747  | 0.123533804  | 0.182449507  | -0.058915703 | 0.999933887 | 0.112607644  | 0.015506584  | 0.097101061  | 0.789601773 |
| ENSG00000170482  | SLC23A1    | 0.499761503  | -0.236392259 | -0.016823317 | -0.219568942 | 0.999933887 | -0.137657898 | -0.252879909 | 0.11522201   | 0.789655594 |
| ENSG00000146007  | ZMAT2      | 5.97603116   | -0.08763341  | -0.115236292 | 0.027602882  | 0.999933887 | -0.053385573 | -0.009099417 | -0.044286156 | 0.789655594 |
| ENSG00000148344  | PTGES      | -0.848622849 | -0.314257002 | -0.114651386 | -0.197442616 | 0.999933887 | 3.145966697  | 2.912726654  | 0.233240043  | 0.789821856 |
| ENSG00000159363  | ATP13A2    | 3.120604923  | -0.027975476 | 0.014555152  | -0.042530628 | 0.999933887 | 0.132032161  | -0.190463554 | -0.058431393 | 0.789821856 |
| ENSG00000232880  | SMG7-AS1   | 0.545416954  | 0.233398673  | 0.458930741  | -0.225532068 | 0.999933887 | 1.347153248  | 1.461435798  | -0.11428255  | 0.789920255 |
| ENSG00000177879  | AP3S1      | 5.338434725  | -0.016171532 | -0.040416652 | 0.02424512   | 0.999933887 | -0.412248771 | -0.45520431  | -0.040955539 | 0.789920255 |
| ENSG00000261592  | AC010531.3 | 1.913960587  | 0.222391316  | 0.301850817  | -0.079459501 | 0.999933887 | 0.340930001  | 0.243178395  | 0.097751606  | 0.790184597 |
| ENSG00000257267  | ZNF271P    | 3.079383411  | -0.183545897 | -0.114888109 | -0.068657787 | 0.999933887 | -0.239308485 | -0.298985634 | 0.059677149  | 0.79046132  |
| ENSG00000100066  | NUP160     | 3.968446988  | -0.089102075 | 0.074882411  | -0.164084486 | 0.970123867 | -0.016056246 | -0.044287754 | -0.054287754 | 0.79057628  |
| ENSG00000092470  | WDR76      | 0.222476142  | -0.114590605 | -0.106952465 | -0.007406601 | 0.999933887 | 0.101649152  | 0.000392135  | 0.101257017  | 0.79057628  |
| ENSG00000189306  | RRP7A      | 3.507612976  | 0.046999359  | 0.0334191    | 0.01358026   | 0.999933887 | -0.028227952 | 0.073900234  | 0.045672282  | 0.79057628  |
| ENSG00000170962  | PDGFD      | 0.842636541  | -0.02488813  | -0.121454595 | 0.096566465  | 0.999933887 | -0.183264758 | -0.090578591 | -0.092686167 | 0.79057628  |
| ENSG00000229153  | EPHA1-AS1  | 0.100428879  | 0.157739334  | -0.042325436 | 0.20064477   | 0.999933887 | 0.015501488  | -0.177521756 | -0.177521756 | 0.790627673 |
| ENSG00000239653  | PSMD6-AS2  | 1.758354553  | -0.131469498 | -0.204603677 | 0.07313418   | 0.999933887 | -0.615691994 | -0.764491624 | 0.14879963   | 0.790780856 |
| ENSG00000193735  | SLC22A5    | 1.5329161    | -0.088539658 | 0.044754613  | -0.133294272 | 0.999933887 | 0.068253696  | 0.149005919  | -0.080752223 | 0.790780856 |
| ENSG00000168096  | ANKS3      | 1.646062272  | 0.078645103  | 0.165091591  | -0.086446488 | 0.999933887 | 0.045793241  | 0.118584325  | -0.072791084 | 0.790780856 |
| ENSG00000173660  | UQCRRH     | 4.003294804  | -0.03654163  | 0.029810477  | -0.066352107 | 0.999933887 | 0.085408831  | 0.12931947   | -0.043911117 | 0.790780856 |
| ENSG00000170791  | CHCHD7     | 2.801434879  | -0.038432386 | -0.065038746 | 0.02660636   | 0.999933887 | 0.163707263  | 0.093676058  | 0.070031205  | 0.790780856 |
| ENSG00000234444  | ZNF736     | 2.343082558  | -0.012470026 | 0.117644709  | -0.130114735 | 0.999933887 | -0.119115419 | -0.052718186 | -0.066397234 | 0.790780856 |
| ENSG00000174468  | C12orf76   | 2.071158867  | 0.154447864  | -0.141892183 | 0.999933887  | 0.049089162 | 0.125213486  | -0.076132186 | 0.790780856  |             |
| ENSG00000168924  | LETM1      | 3.101735497  | 0.008460513  | -0.03786374  | 0.046324253  | 0.999933887 | 0.102832547  | 0.047862512  | 0.054970035  | 0.790780856 |
| ENSG00000204029  | LRRIPIP1   | 1.261209313  | 0.012541199  | 0.544480127  | -0.531938928 | 0.999933887 | -0.128683953 | -0.373243149 | 0.244559196  | 0.790780856 |
| ENSG00000090266  | NDUFB2     | -0.085391026 | -0.048211974 | 0.07050187   | -0.118713844 | 0.999933887 | 0.049157297  | 0.109546163  | -0.060388866 | 0.790909838 |
| ENSG00000136463  | TACO1      | 1.450528196  | -0.102096805 | 0.043606471  | -0.145157276 | 0.999933887 | -0.044102439 | -0.138523725 | 0.094421285  | 0.790959179 |
| ENSG00000080947  | CROCCP3    | 1.777324062  | -0.066802174 | 0.006396048  | -0.073198223 | 0.999933887 | 0.069784696  | 0.137891481  | -0.068106786 | 0.790959179 |
| ENSG00000240023  | AL133163.1 | -1.638451977 | -0.169151778 | 0.169089578  | -0.338241356 | 0.999933887 | 2.290188572  | 2.520414753  | -0.230226181 | 0.790959179 |
| ENSG00000266232  | MIR3178    | -0.185955935 | 0.348415118  | 0.192972503  | 0.155442616  | 0.999933887 | 0.394494673  | 0.227371048  | 0.167123625  | 0.791046379 |
| ENSG00000279861  | AC0735947  | 0.505212907  | 0.080317353  | 0.132126091  | -0.051843239 | 0.999933887 | 0.194278587  | -0.053476258 | -0.053184011 | 0.791199266 |
| ENSG00000172183  | ISG20      | 8.073990997  | 0.02870254   | 0.015389659  | 0.013312881  | 0.999933887 | 0.154632301  | 0.122913834  | 0.031718467  | 0.791199266 |
| ENSG00000183690  | EFHC2      | 0.879274888  | 0.002012652  | -0.224932916 | 0.226945568  | 0.999933887 | 0.010450324  | 0.14156808   | -0.131117756 | 0.791199266 |
| ENSG00000213614  | HEXA       | 0.676859075  | 0.008441533  | 0.07991777   | -0.014776237 | 0.999933887 | -0.02179618  | 0.034904162  | -0.056700342 | 0.79127598  |
| ENSG00000177971  | IMP3       | 1.72416057   | -0.169144749 | 0.033469907  | -0.202614656 | 0.999933887 | 0.080767735  | -0.148863284 | -0.06809555  | 0.791972687 |
| ENSG00000263826  | AC112907.3 | 0.877991006  | 0.116598583  | 0.359369494  | -0.242770911 | 0.999933887 | 0.363903554  | 0.470548844  | -0.10664529  | 0.791972687 |
| ENSG00000121064  | SCPEP1     | 4.601468056  | -0.05103277  | -0.069175661 | 0.018142892  | 0.999933887 | -0.525986401 | -0.568310286 | 0.042338885  | 0.791972687 |
| ENSG00000254428  | AP003392.1 | 1.080472349  | -0.085039395 | -0.009738267 | -0.077501128 | 0.999933887 | -0.150979562 | -0.060902969 | -0.090076594 | 0.791972687 |
| ENSG00000120647  | CCDC77     | 1.049112214  | -0.087032135 | 0.072031944  | -0.159064079 | 0.999933887 | -0.333129604 | -0.426033119 | 0.092903515  | 0.791972687 |
| ENSG00000133169  | BEX1       | 0.473831239  | -0.073644376 | 0.073644376  | -0.314289912 | 0.999933887 | 0.527163833  | 0.426004171  | 0.101159662  | 0.792044949 |
| ENSG00000176438  | SYNE3      | 4.814305158  | -0.003807213 | 0.067840525  | -0.071647738 | 0.999933887 | -0.05843373  | -0.084079299 | 0.035645569  | 0.792044949 |
| ENSG00000132466  | ANKRD17    | 5.930723809  | -0.006586468 | 0.015285296  | -0.021871764 | 0.999933887 | -0.151685973 | -0.151685973 | -0.039910774 | 0.792286002 |
| ENSG00000234745  | HLA-B      | 13.079654663 | 0.024812836  | 0.001453488  | 0.023359348  | 0.999933887 | 0.315819552  | 0.346492092  | -0.03067254  | 0.792497333 |
| ENSG00000141644  | MBD1       | 5.883326724  | 0.000113108  | -0.024490723 | 0.024603831  | 0.999933887 | -0.061010925 | -0.091725715 | 0.03071479   | 0.792497333 |
| ENSG00000130956  | HABP4      | 1.604300222  | -0.07250175  | 0.100521658  | -0.173023408 | 0.999933887 | 0.090313906  | 0.168526225  | -0.07821232  | 0.792672776 |
| ENSG00000157349  | DDX19B     | 1.80087464   | 0.019398668  | -0.0039651   | 0.023363768  |             |              |              |              |             |

|                 |             |              |              |               |              |             |              |              |               |             |
|-----------------|-------------|--------------|--------------|---------------|--------------|-------------|--------------|--------------|---------------|-------------|
| ENSG00000228242 | XPC-AS1     | 3.542342324  | -0.042101265 | -0.056835221  | 0.014733956  | 0.999933887 | -0.839494643 | -0.901989205 | 0.062494562   | 0.79465696  |
| ENSG00000123989 | CHPF        | 0.835937614  | 0.043137872  | -0.093918372  | 0.137056244  | 0.999933887 | 0.08230355   | 0.190608216  | -0.108304666  | 0.79465696  |
| ENSG00000286885 | AL138824.1  | 0.096469295  | -0.038149274 | 0.148602575   | -0.186751849 | 0.999933887 | -0.070482954 | -0.203643778 | 0.133160824   | 0.79465696  |
| ENSG00000233355 | CHRM3-AS2   | 2.76761138   | -0.002576928 | -0.184781441  | 0.182204513  | 0.999933887 | -0.124321704 | -0.058020165 | -0.066301539  | 0.79465696  |
| ENSG00000180917 | CMTR2       | 1.834508336  | -0.102908139 | -0.157195868  | 0.054287729  | 0.999933887 | 0.014446603  | 0.095747177  | -0.0813300574 | 0.794730918 |
| ENSG00000268041 | ERFL        | 0.663441861  | 0.16296102   | 0.017769428   | 0.14526674   | 0.999933887 | -0.069921932 | 0.050440224  | -0.120362156  | 0.795010951 |
| ENSG00000198841 | KT112       | 0.109341202  | -0.127496402 | 0.287255104   | -0.414751506 | 0.999933887 | -0.205188945 | -0.324444648 | 0.119255704   | 0.795010951 |
| ENSG00000160072 | ATAD3B      | 3.665347701  | 0.015850134  | 0.068109541   | -0.052259407 | 0.999933887 | 0.13581199   | 0.057875274  | -0.057059246  | 0.795010951 |
| ENSG00000138617 | PARP16      | 2.711566917  | -0.007207226 | -0.006814574  | -0.000392652 | 0.999933887 | 0.202002171  | 0.259933134  | -0.057930963  | 0.795010951 |
| ENSG00000176383 | B3GN24      | 0.803241467  | -0.008974068 | 0.228561101   | 0.237535168  | 0.999933887 | 0.412513555  | 0.221567923  | -0.190945632  | 0.795010951 |
| ENSG00000229162 | RUNX3-AS1   | -0.745550116 | 0.333588555  | 0.092370667   | 0.241217888  | 0.999933887 | 0.019355993  | 0.175043062  | -0.15568707   | 0.795051595 |
| ENSG00000176349 | AC104129.1  | -0.740358017 | 0.040556286  | 0.122316487   | -0.081760202 | 0.999933887 | -0.226689071 | -0.048699888 | -0.177989183  | 0.795090774 |
| ENSG00000202596 | SEC63       | 4.3746354    | -0.059382257 | -0.161069455  | 0.101687198  | 0.999933887 | -0.399129323 | -0.335708938 | -0.063420385  | 0.795226327 |
| ENSG00000179348 | GATA2       | 1.523447875  | -0.005080919 | 0.179225145   | -0.184306064 | 0.999933887 | -0.025231162 | 0.050588552  | -0.075819714  | 0.795226327 |
| ENSG00000166170 | BAG5        | 4.649644651  | -0.066970761 | -0.025650237  | -0.041320524 | 0.999933887 | -0.395549863 | -0.356096409 | -0.039453454  | 0.795632284 |
| ENSG00000140632 | GLYR1       | 5.965152209  | -0.035115331 | 0.014962108   | -0.050077439 | 0.999933887 | -0.205580723 | -0.235733237 | 0.030152514   | 0.795632284 |
| ENSG00000124313 | IQSEC2      | 1.652584646  | 0.061014257  | -0.032171536  | 0.093185793  | 0.999933887 | -0.226894509 | -0.143944376 | -0.082950133  | 0.795632284 |
| ENSG00000101400 | SNTA1       | 0.416268282  | 0.038909109  | 0.179790961   | -0.158881852 | 0.999933887 | 0.128590274  | -0.00573618  | 0.134326454   | 0.795632284 |
| ENSG00000277972 | CISD3       | 2.212904373  | 0.117060075  | 0.019848569   | 0.097211506  | 0.999933887 | 0.216356414  | 0.160597     | 0.055759414   | 0.795799772 |
| ENSG00000144647 | POMGNT2     | 0.850301238  | -0.067758519 | 0.054927111   | -0.122685629 | 0.999933887 | 0.060224551  | 0.187979171  | -0.127773366  | 0.795799772 |
| ENSG00000214797 | AP002358.1  | -0.853540307 | 0.064888347  | -0.125558147  | 0.190446494  | 0.999933887 | 0.324007156  | 0.574998267  | -0.250991111  | 0.795799772 |
| ENSG00000166905 | LARGE2      | -0.333908232 | 0.133231341  | 0.128376108   | 0.004855233  | 0.999933887 | -0.075080612 | 0.123098242  | 0.12230923    | 0.796017408 |
| ENSG00000124549 | BTN2A3P     | 0.974628889  | 0.068227911  | 0.116502829   | -0.048274918 | 0.999933887 | 0.166454971  | 0.077649388  | 0.088805583   | 0.796017408 |
| ENSG00000107745 | MICU1       | 5.256612376  | 0.030057183  | 0.011260046   | -0.008020863 | 0.999933887 | 0.111871633  | 0.150877359  | -0.039005726  | 0.796017408 |
| ENSG00000181610 | MRPS23      | 1.377260271  | 0.163134168  | 0.189585221   | 0.18209239   | 0.999933887 | 0.005289899  | 0.085211972  | -0.079220703  | 0.796261006 |
| ENSG00000152102 | FAM168B     | 6.793737009  | -0.07943005  | -0.039942095  | -0.039487955 | 0.999933887 | 0.007145663  | 0.036000059  | -0.028854388  | 0.796264074 |
| ENSG00000259950 | AC034105.3  | 1.993742778  | 0.190344853  | 0.450634394   | -0.260289585 | 0.999933887 | 0.893203004  | 1.008114591  | -0.114911586  | 0.796264074 |
| ENSG00000185236 | RAB11B      | 5.967949109  | 0.044681501  | 0.032471709   | 0.12209792   | 0.999933887 | -0.164820975 | -0.200030376 | 0.035209782   | 0.796264074 |
| ENSG00000285053 | AL357556.3  | -0.284204345 | -0.146040846 | -0.19835374   | 0.052312893  | 0.999933887 | -0.128863343 | -0.25436657  | 0.125503417   | 0.796264074 |
| ENSG00000119969 | HELLS       | -0.091193518 | 0.102226582  | 0.034471334   | 0.067755248  | 0.999933887 | -0.140202384 | -0.007837053 | -0.132365331  | 0.796264074 |
| ENSG00000235499 | AC073046.1  | 3.463376716  | 0.052239276  | 0.103063442   | -0.050824166 | 0.999933887 | 0.641508314  | 0.694860221  | -0.053351907  | 0.796264074 |
| ENSG00000187866 | FAM122A     | 2.65662696   | 0.019853673  | -0.055328442  | 0.075182315  | 0.999933887 | -0.164856528 | -0.23108898  | 0.066232452   | 0.796264074 |
| ENSG00000197165 | SULT1A2     | 0.261253065  | -0.270344743 | -0.382693144  | 0.112348401  | 0.999933887 | -0.943102514 | -1.048939816 | 0.105836402   | 0.796534478 |
| ENSG00000132356 | PRKAA1      | 5.183624479  | -0.017325676 | -0.060081576  | 0.042755899  | 0.999933887 | -0.403748473 | -0.350177009 | -0.053571464  | 0.796534478 |
| ENSG00000162889 | MAPKAPK2    | 9.225812742  | 0.007329771  | -0.004481636  | 0.011811407  | 0.999933887 | 0.405158117  | 0.436326436  | -0.031168319  | 0.796534478 |
| ENSG00000106524 | ANKMY2      | 1.711134212  | -0.099935657 | 0.047686785   | -0.147622443 | 0.999933887 | 0.06930829   | -0.013798824 | 0.083107113   | 0.796760477 |
| ENSG00000121152 | NCAPH       | 0.256104232  | -0.142315085 | -0.162371538  | 0.020056452  | 0.999933887 | 0.212068341  | -0.131988649 | -0.105928037  | 0.796898547 |
| ENSG00000132470 | ITGB4       | 2.912020037  | 0.07115559   | 0.097598767   | -0.026443177 | 0.999933887 | -0.085080753 | -0.161023108 | 0.075942355   | 0.796898547 |
| ENSG00000273136 | NBPFF2      | 4.927266504  | -0.102688589 | -0.050441798  | -0.052246792 | 0.999933887 | 0.391367094  | 0.31320632   | 0.078160737   | 0.796898547 |
| ENSG00000115112 | TFCP2L1     | -0.145338822 | -0.086139682 | 0.236759297   | -0.322898978 | 0.999933887 | -0.173358808 | 0.03699706   | -0.136361748  | 0.796898547 |
| ENSG00000163029 | SMC6        | 2.391483025  | -0.058214203 | -0.151047055  | 0.092832852  | 0.999933887 | -0.201387756 | -0.089016884 | -0.112370871  | 0.796898547 |
| ENSG00000148843 | PDCD11      | 3.11600284   | 0.028230935  | -0.016551043  | 0.044781978  | 0.999933887 | 0.160633414  | 0.112084228  | 0.048549186   | 0.796898547 |
| ENSG00000153187 | HNRNP1      | 8.6420907    | -0.014248621 | -0.008711234  | -0.005537388 | 0.999933887 | -0.003852999 | 0.024773835  | -0.028626834  | 0.796898547 |
| ENSG00000053702 | NRIP2       | 0.662515419  | -0.018637378 | 0.16606453    | -0.184701908 | 0.999933887 | 0.021445979  | -0.080326188 | 0.101772167   | 0.796898547 |
| ENSG00000137168 | PPL1        | 0.357970626  | -0.019305844 | 0.029554959   | -0.048607098 | 0.999933887 | 0.205281394  | 0.097736531  | 0.107544863   | 0.796898547 |
| ENSG00000180423 | HARBI1      | 1.08720686   | -0.010019785 | -0.121437721  | 0.111417936  | 0.999933887 | 0.310069248  | 0.052485422  | 0.083113826   | 0.796898547 |
| ENSG00000283041 | AC008038.1  | 0.263631194  | -0.117499715 | -0.009939627  | -0.107560088 | 0.999933887 | 0.17202982   | 0.2796987563 | -0.076667743  | 0.797042916 |
| ENSG00000100445 | SDR39U1     | 1.0445475313 | 0.051466016  | 0.091491292   | -0.023453275 | 0.999933887 | 0.154779916  | 0.072297513  | 0.082482402   | 0.797042916 |
| ENSG00000107263 | RAPGEF1     | 8.874505048  | 0.004047904  | 0.019934043   | -0.015886138 | 0.999933887 | 0.0356215    | 0.066774565  | -0.031153065  | 0.797042916 |
| ENSG00000235194 | PPP1R3E     | 4.933549508  | 0.033032699  | 0.10590644    | -0.072873741 | 0.999933887 | 0.190617045  | 0.237414331  | -0.046797287  | 0.797148008 |
| ENSG00000140463 | BBS4        | 2.584944495  | -0.070232245 | 0.031128454   | -0.101360701 | 0.999933887 | -0.000753742 | 0.050123753  | 0.050483791   | 0.797325512 |
| ENSG00000285518 | AC004900.1  | -1.203626724 | -0.172986156 | -0.082054375  | -0.090931781 | 0.999933887 | 0.879712215  | 0.110384109  | -0.221671893  | 0.797619749 |
| ENSG00000136717 | BIN1        | 4.382659086  | 0.049637412  | 0.020530534   | 0.029106879  | 0.999933887 | 0.050462173  | 0.046406071  | 0.046406102   | 0.797715008 |
| ENSG00000107223 | EDF1        | 5.317514901  | 0.041599816  | 0.047383381   | -0.005783565 | 0.999933887 | 0.095628852  | 0.051394099  | 0.044234752   | 0.797715008 |
| ENSG00000198589 | LRBA        | 3.706998059  | -0.041871558 | 0.013042071   | -0.028829487 | 0.999933887 | -0.051536289 | 0.013381346  | -0.064917636  | 0.797715008 |
| ENSG00000163508 | EOMES       | 3.297644333  | -0.026223698 | -0.061314353  | 0.036919855  | 0.999933887 | 0.185573934  | 0.135817395  | 0.049756538   | 0.797715008 |
| ENSG00000164031 | DNAJB14     | 4.33078675   | -0.03994773  | -0.203627142  | 0.163679412  | 0.999933887 | -0.799247182 | -0.684480688 | -0.104766494  | 0.797715008 |
| ENSG00000129824 | RPS4Y1      | -2.454854904 | -0.020214717 | -0.165283911  | 0.145069194  | 0.999933887 | -0.084762244 | -0.15313365  | 0.068371406   | 0.797779716 |
| ENSG00000139914 | FITM1       | 0.168451381  | 0.359851121  | -0.289251245  | 0.649102366  | 0.144167088 | -0.106044461 | -0.209757578 | 0.103713117   | 0.79779194  |
| ENSG00000132768 | DPH2        | 1.621557607  | 0.10459765   | -0.156980453  | 0.261578104  | 0.999933887 | 0.278430265  | 0.20962986   | 0.068804005   | 0.797823174 |
| ENSG00000272555 | AC009974.1  | -0.875105249 | -0.19528304  | -0.476641723  | 0.281358683  | 0.999933887 | 0.619991936  | 0.756320201  | -0.136328265  | 0.797823174 |
| ENSG00000255808 | PDE2A-AS1   | -0.762401867 | 0.128147872  | 0.043282517   | 0.084865335  | 0.999933887 | 0.575817122  | 0.830365162  | -0.25454804   | 0.797823174 |
| ENSG00000165494 | PCF11       | 7.975816777  | 0.042152328  | -0.066906441  | 0.109058769  | 0.999933887 | 0.264247502  | 0.093435482  | -0.04514708   | 0.798045325 |
| ENSG00000169057 | MCEP2       | 7.623209663  | 0.023656779  | 0.027798814   | -0.004142035 | 0.999933887 | 0.129968758  | 0.163175954  | -0.033207196  | 0.798045325 |
| ENSG00000139679 | LPAR6       | 3.347543067  | -0.107119668 | -0.137244627  | 0.03012496   | 0.999933887 | -0.323720595 | -0.394313728 | 0.070593133   | 0.798644963 |
| ENSG00000231889 | TRAF3IP2-AS | 2.049636921  | 0.066432618  | -0.035670647  | 0.102103265  | 0.999933887 | 0.80829399   | 0.88003202   | -0.071738031  | 0.798644963 |
| ENSG00000143502 | SUSD4       | -0.876890097 | 0.077763052  | -0.149179955  | 0.226943007  | 0.999933887 | 0.091578183  | 0.239958237  | -0.148374654  | 0.798644963 |
| ENSG00000167700 | MFS03       | 0.650101757  | 0.042673707  | -0.034464516  | 0.077138223  | 0.999933887 | 0.344284165  | 0.239680208  | 0.104603957   | 0.798644963 |
| ENSG00000280135 | AL09816.1   | 2.103075187  | -0.062071668 | -0.0839597168 | 0.0218855    | 0.999933887 | 0.000240689  | -0.068060448 | 0.068301137   | 0.798964436 |
| ENSG00000204685 | STARD7-AS1  | 3.371594517  | -0.078481539 | 0.014136386   | -0.092617925 | 0.999933887 | 0.123963927  | 0.063279831  | 0.036279831   | 0.799190091 |
| ENSG00000126903 | SLC10A3     | 4.726698181  | 0.051898132  |               |              |             |              |              |               |             |

|                 |            |              |              |              |              |             |              |              |              |             |
|-----------------|------------|--------------|--------------|--------------|--------------|-------------|--------------|--------------|--------------|-------------|
| ENSG00000133026 | MYH10      | 3.749588668  | 0.047105701  | -0.019830117 | 0.066935818  | 0.999933887 | -0.029853295 | -0.104128837 | 0.074275542  | 0.800304159 |
| ENSG00000113758 | DBN1       | 4.576108347  | 0.037470821  | 0.08373509   | -0.046264269 | 0.999933887 | 0.41569542   | 0.458585831  | -0.042890411 | 0.800304159 |
| ENSG00000127952 | STYXL1     | 2.849619748  | 0.043236075  | -0.038462934 | 0.08169009   | 0.999933887 | 0.025207575  | 0.074164277  | -0.048956702 | 0.800304159 |
| ENSG00000179282 | RAD23A     | 4.634916244  | -0.029034838 | 0.028940498  | -0.057975336 | 0.999933887 | -0.111254214 | -0.146567097 | 0.035312883  | 0.800304159 |
| ENSG00000286159 | AL035106.1 | 3.232844788  | -0.030003561 | -0.075036529 | 0.045032968  | 0.999933887 | -0.097553182 | -0.028939135 | -0.069160047 | 0.800304159 |
| ENSG00000260231 | KDM7A-DT   | 1.966715316  | 0.030946426  | 0.155625418  | -0.124678992 | 0.999933887 | 0.366399494  | 0.262814072  | 0.103585421  | 0.800304159 |
| ENSG00000167286 | CD3D       | 4.945029344  | 0.009388365  | -0.027545152 | 0.036933517  | 0.999933887 | 0.12778374   | 0.168576312  | -0.040792572 | 0.800304159 |
| ENSG00000106433 | GOSR2      | 2.9634396376 | 0.10622982   | -0.017042424 | 0.027665407  | 0.999933887 | 0.058536677  | 0.107326171  | -0.048789494 | 0.800304159 |
| ENSG00000080020 | CRYBG3     | -0.506010553 | 0.00693584   | 0.034061153  | -0.027125314 | 0.999933887 | -0.196377609 | 0.003046294  | -0.199423903 | 0.800304159 |
| ENSG00000279425 | AC092279.2 | 1.232387281  | -0.002987763 | 0.13980243   | -0.142790193 | 0.999933887 | -0.481258507 | -0.571528085 | 0.090269678  | 0.800304159 |
| ENSG00000258521 | AL157871.2 | 0.972078824  | -0.0014196   | -0.040385121 | 0.03894552   | 0.999933887 | 0.168584934  | 0.282470129  | -0.113885195 | 0.800304159 |
| ENSG00000126458 | RRAS       | 0.751028266  | 0.062550825  | 0.025526202  | 0.037024623  | 0.999933887 | -0.133980472 | -0.023037963 | -0.110942509 | 0.800326581 |
| ENSG00000138801 | PAPSS1     | 3.619233073  | 0.002834554  | -0.09362674  | 0.096461293  | 0.999933887 | -0.173173485 | -0.048601768 | 0.800329721  | 0.800329721 |
| ENSG00000272150 | NBPFF2P    | -0.831798722 | -0.069442246 | -0.459299053 | 0.389856807  | 0.999933887 | 0.341292743  | 0.191108038  | 0.150184705  | 0.800797278 |
| ENSG00000105197 | TIMM50     | 2.701888098  | 0.063293047  | 0.099237565  | -0.035944518 | 0.999933887 | 0.099646089  | 0.160742563  | 0.061096474  | 0.800843298 |
| ENSG00000134186 | PRPF38B    | 6.503823642  | 0.004382404  | -0.067749692 | 0.072132095  | 0.999933887 | -0.047780315 | 0.011690826  | -0.05947114  | 0.800843298 |
| ENSG00000095383 | TBC1D2     | 7.923640771  | -0.076342665 | -0.068158894 | -0.008183771 | 0.999933887 | -0.422179856 | -0.371495202 | -0.050684653 | 0.801168876 |
| ENSG00000008876 | CRLS1      | -0.609049975 | 0.1540938    | 0.161480315  | -0.007386516 | 0.999933887 | -0.090355537 | -0.086286895 | -0.178624232 | 0.801168876 |
| ENSG00000188536 | HBA2       | 5.679225274  | -0.067799947 | -0.140515965 | 0.072516529  | 0.999933887 | 0.025335023  | 0.095693776  | -0.070358753 | 0.801168876 |
| ENSG00000204315 | FKBPL      | 0.335969345  | 0.077758452  | -0.086424904 | 0.164201357  | 0.999933887 | -0.334164826 | -0.451383579 | 0.117418753  | 0.801168601 |
| ENSG00000204121 | SUMO1P1    | 2.925022084  | -0.018067981 | 0.038107032  | -0.056175013 | 0.999933887 | 0.015512982  | -0.046729105 | 0.062242087  | 0.801300381 |
| ENSG00000205760 | SLC35B4    | 1.250462733  | -0.132146341 | 0.048816886  | -0.180963227 | 0.999933887 | -0.156736826 | -0.07428111  | -0.084308716 | 0.801737273 |
| ENSG00000188647 | PTAR1      | 5.09391902   | -0.011220974 | -0.060086035 | 0.048865061  | 0.999933887 | -0.543234107 | -0.46798611  | -0.075247997 | 0.801737273 |
| ENSG00000166165 | CKB        | 1.478152602  | 0.119415579  | -0.03794057  | 0.157356149  | 0.999933887 | 0.911443762  | 1.025038316  | -0.113595454 | 0.801777601 |
| ENSG00000107819 | SFXN3      | 4.753829175  | 0.037205116  | 0.011073019  | 0.026132097  | 0.999933887 | -0.141940645 | -0.180545804 | 0.03860516   | 0.801777601 |
| ENSG00000151135 | TMEM263    | 2.060826642  | -0.058050523 | -0.071204943 | 0.11270442   | 0.999933887 | -0.073708395 | -0.000699533 | -0.073008861 | 0.801777601 |
| ENSG00000131495 | NDUFA2     | 3.456929826  | -0.004652208 | 0.001480913  | -0.006133121 | 0.999933887 | -0.135666063 | -0.184681385 | 0.049015322  | 0.801777601 |
| ENSG00000138231 | DBR1       | 1.998013577  | -0.00294137  | -0.17672076  | 0.17377939   | 0.999933887 | -0.139728356 | -0.21210646  | 0.072378104  | 0.801777601 |
| ENSG00000166818 | STX18      | 2.576667382  | -0.088059668 | 0.157505407  | -0.245565075 | 0.944004537 | 0.059373679  | 0.103026572  | -0.043652893 | 0.801835092 |
| ENSG00000274767 | AC243829.1 | 4.06386388   | -0.037413043 | -0.095327829 | 0.057914786  | 0.999933887 | 0.027983902  | -0.022578175 | 0.050562077  | 0.801835092 |
| ENSG00000153879 | CEBPG      | 3.118519332  | -0.028830293 | -0.001255585 | -0.027574708 | 0.999933887 | 0.003843561  | 0.050261402  | -0.04641784  | 0.801835092 |
| ENSG00000084072 | PIIE       | 2.784355735  | -0.031920226 | 0.003340088  | -0.035261106 | 0.999933887 | 0.097096638  | 0.041432757  | 0.055663882  | 0.801835092 |
| ENSG00000181396 | OGFOD3     | 1.538768594  | 0.013938184  | -0.00170415  | 0.015642334  | 0.999933887 | 0.032048318  | 0.118747821  | -0.086699503 | 0.801835092 |
| ENSG00000131165 | CHMP1A     | 7.103806118  | -0.00088213  | -0.021759402 | -0.022461532 | 0.999933887 | 0.053952034  | -0.034614415 | 0.081835092  | 0.801835092 |
| ENSG00000153944 | MSI2       | 4.260219879  | 0.030490111  | 0.085616847  | -0.055126735 | 0.999933887 | -0.069024097 | -0.106860323 | 0.037836226  | 0.801839106 |
| ENSG00000071462 | BDU23      | 4.119081051  | 0.002173171  | -0.033024681 | 0.035197851  | 0.999933887 | 0.157460902  | 0.122590277  | 0.034870624  | 0.801839106 |
| ENSG00000138002 | IFI172     | 1.482954919  | 0.15810601   | 0.009883064  | -0.005927537 | 0.999933887 | -0.150533622 | -0.080253988 | -0.070279634 | 0.802371996 |
| ENSG00000170486 | KRT72      | -1.181968495 | 0.025846118  | -0.0659516   | 0.091977718  | 0.999933887 | -0.104545894 | 0.045414759  | -0.149906653 | 0.802485978 |
| ENSG00000176593 | AC008969.1 | 1.161620698  | -0.163383248 | -0.146901608 | -0.016481639 | 0.999933887 | -0.124810131 | -0.049076789 | -0.075733342 | 0.802495662 |
| ENSG00000117899 | MESD       | 2.641688644  | -0.064839482 | -0.158053499 | 0.093214017  | 0.999933887 | 0.015581938  | -0.05274727  | 0.068329208  | 0.802495662 |
| ENSG00000218073 | AL021407.2 | 0.650703239  | 0.030714835  | -0.01696063  | 0.047675465  | 0.999933887 | 0.244034773  | 0.391629121  | -0.147594347 | 0.802576406 |
| ENSG00000198835 | GJC2       | -0.191633519 | 0.10974168   | 0.25347431   | -0.143732629 | 0.999933887 | 0.247662721  | 0.429737055  | -0.182074334 | 0.802650045 |
| ENSG00000204130 | RUFY2      | 2.265225527  | -0.104031399 | -0.083427203 | -0.020604196 | 0.999933887 | -0.535647456 | -0.453449045 | -0.082198411 | 0.802736683 |
| ENSG00000113522 | RAD50      | -0.828532928 | 0.156392304  | 0.094953016  | 0.061439018  | 0.999933887 | -0.002391096 | -0.15485121  | 0.152460115  | 0.802736683 |
| ENSG00000141378 | PTRH2      | 2.557558412  | -0.070562729 | -0.02539005  | -0.04517268  | 0.999933887 | -0.123677485 | -0.188537096 | 0.064859611  | 0.802875477 |
| ENSG00000185808 | PIGP       | -0.020403719 | 0.069826747  | 0.00743846   | 0.062388287  | 0.999933887 | 0.093492922  | -0.025745255 | 0.119238177  | 0.802875477 |
| ENSG00000276523 | AC025287.3 | 3.613872239  | -0.00699357  | 0.111129427  | -0.118122997 | 0.999933887 | 0.830828148  | 0.890771028  | -0.05994288  | 0.802932166 |
| ENSG00000036448 | MYOM2      | 1.214913836  | -0.095264783 | 0.124810386  | -0.063084388 | 0.999933887 | 0.256077299  | 0.151297538  | 0.104779761  | 0.803028986 |
| ENSG00000134970 | TMED7      | 3.914811187  | -0.085813675 | 0.028202688  | -0.114016363 | 0.999933887 | -0.672191308 | -0.729350348 | 0.05715904   | 0.803529217 |
| ENSG00000099940 | SNAP29     | 4.075034076  | -0.011704866 | 0.002003723  | -0.013708589 | 0.999933887 | -0.450254697 | -0.493813862 | 0.043559165  | 0.803529217 |
| ENSG00000279865 | AC006511.3 | 0.450769327  | 0.010726341  | 0.212955737  | -0.102229396 | 0.999933887 | 1.14545194   | 1.308441366  | 0.107007804  | 0.803637186 |
| ENSG00000196549 | MME        | 7.310883757  | -0.031985534 | -0.144317651 | 0.112332116  | 0.999933887 | -0.920323549 | -0.978873952 | 0.058550403  | 0.803860469 |
| ENSG00000260097 | SPDYE6     | 0.411560175  | -0.186931057 | -0.037839668 | -0.149091385 | 0.999933887 | 0.126495016  | -0.022870771 | 0.102275693  | 0.804000145 |
| ENSG00000143257 | NR1I3      | 2.474798192  | 0.09057824   | 0.095384624  | -0.004806384 | 0.999933887 | 1.32328409   | 1.407215591  | -0.083931501 | 0.804000145 |
| ENSG00000094631 | HDAC6      | 4.528603442  | 0.021591416  | -0.114713522 | -0.093122106 | 0.999933887 | 0.179780378  | 0.224760605  | -0.044980227 | 0.804000145 |
| ENSG00000274114 | ALOX15P1   | -0.74415804  | 0.026069981  | -0.164646312 | 0.191256294  | 0.999933887 | -0.129703114 | -0.16968562  | 0.107061642  | 0.804000145 |
| ENSG00000274750 | H3C6       | -1.203829502 | 0.334851885  | -0.418836048 | 0.753687932  | 0.999933887 | -0.129432317 | -0.273699095 | 0.144266778  | 0.804052803 |
| ENSG00000144591 | GMPPA      | 2.664262769  | 0.028785048  | -0.005993091 | 0.034754079  | 0.999933887 | -0.007070065 | -0.058187299 | 0.051117234  | 0.804070072 |
| ENSG00000002016 | RAD52      | 1.612959589  | 0.008757011  | 0.004953025  | 0.030803986  | 0.999933887 | -0.041924068 | -0.123768835 | 0.081844767  | 0.804070072 |
| ENSG00000112782 | CLIC5      | 0.193593642  | -0.048242373 | 0.065139054  | -0.113381426 | 0.999933887 | -0.029149483 | -0.127995838 | 0.098845955  | 0.804092021 |
| ENSG00000177706 | FAM20C     | 1.340903292  | 0.000491198  | 0.034800439  | -0.034309241 | 0.999933887 | -0.578023756 | -0.476787134 | -0.101236621 | 0.804092021 |
| ENSG00000171105 | INSR       | 0.755927956  | -0.117192557 | 0.133148724  | -0.250341281 | 0.999933887 | -0.731672584 | -0.610635334 | -0.12103725  | 0.804139901 |
| ENSG00000174032 | SLC25A30   | 2.677625215  | -0.030249921 | -0.019417958 | -0.010831938 | 0.999933887 | -0.167726432 | -0.109345582 | -0.054380865 | 0.804139901 |
| ENSG00000067365 | METTL22    | 4.686384042  | 0.065745428  | 0.051096289  | 0.014649139  | 0.999933887 | -0.145753098 | -0.184867494 | 0.039093695  | 0.804548534 |
| ENSG00000170092 | SPDYE5     | -0.328313697 | -0.134566329 | 0.167933005  | -0.302499334 | 0.999933887 | -0.287366083 | 0.418740585  | 0.131374502  | 0.804548534 |
| ENSG00000089123 | TASP1      | 0.751899011  | 0.050918045  | 0.162616808  | -0.111698763 | 0.999933887 | 0.01386824   | 0.092206206  | -0.078337966 | 0.804548534 |
| ENSG00000128482 | RNF112     | -0.327336291 | 0.019942836  | 0.20565028   | -0.185707444 | 0.999933887 | 0.173667192  | 0.322309597  | -0.148723405 | 0.804548534 |
| ENSG00000104921 | FCER2      | 0.89785308   | 0.054757632  | 0.083531701  | -0.028774069 | 0.999933887 | 0.536847772  | 0.449615962  | 0.08723181   | 0.804620515 |
| ENSG00000107611 | CUBN       | 1.098358086  | 0.037797088  | 0.130704535  | -0.092907447 | 0.999933887 | -0.220003507 | -0.323064062 | 0.103061095  | 0.804620515 |
| ENSG00000274828 | AC068473.5 | 0.764323158  | 0.079723304  | 0.430939111  | -0.359315807 | 0.999933887 | -0.153693942 | -0.224755584 | 0.071061642  | 0.805055589 |
| ENSG00000204420 | MPIG6B     | 0.597119478  | 0.242223871  | 0.140508068  | 0.           |             |              |              |              |             |











|                  |             |              |              |              |              |               |              |              |              |             |
|------------------|-------------|--------------|--------------|--------------|--------------|---------------|--------------|--------------|--------------|-------------|
| ENSG00000013277  | MARCKSLP1   | 0.264459812  | -0.094593041 | -0.037247561 | -0.05734548  | 0.999933887   | 0.314445609  | 0.391789942  | -0.077344332 | 0.845280339 |
| ENSG000000251682 | AC122718.2  | 0.467089251  | 0.260148187  | 0.492271371  | -0.232123184 | 0.999933887   | 0.450795966  | 0.279486588  | 0.171309381  | 0.845295155 |
| ENSG000000150687 | PRSS23      | 1.720830146  | -0.047723581 | -0.194287513 | 0.146557992  | 0.999933887   | 0.017843778  | 0.073347953  | -0.055504175 | 0.845342578 |
| ENSG000000184007 | PTP4A2      | 7.39635215   | -0.04205284  | -0.014661975 | -0.027390865 | 0.999933887   | -0.174679019 | -0.201211152 | 0.026532133  | 0.845490491 |
| ENSG000000174228 | COP59       | 2.502503573  | 0.068493284  | -0.055863403 | 0.124356687  | 0.999933887   | -0.01395911  | -0.06850679  | 0.054691569  | 0.845490491 |
| ENSG000000099250 | NRP1        | 0.317975675  | -0.137302269 | 0.270044573  | -0.407748002 | 0.999933887   | -0.706548516 | -0.648087366 | -0.05846115  | 0.845706183 |
| ENSG000000196943 | NOP9        | 2.966356706  | -0.000787378 | -0.064005042 | 0.063217664  | 0.999933887   | 0.16503876   | 0.124185968  | 0.040852792  | 0.845706183 |
| ENSG000000151240 | DIP2C       | 0.004908462  | -0.401087107 | -0.166427266 | -0.234659841 | 0.999933887   | -0.190259517 | -0.06381347  | -0.106446047 | 0.845742665 |
| ENSG000000286724 | AL73259.1   | 0.006052086  | 0.215091744  | 0.032973614  | 0.18211813   | 0.999933887   | -0.413138094 | -0.522550015 | 0.109411921  | 0.845742665 |
| ENSG000000116406 | EDEM3       | 4.568783275  | 0.004274685  | -0.12673195  | 0.131008635  | 0.999933887   | -0.460682013 | -0.395921682 | -0.064760331 | 0.845742665 |
| ENSG000000141873 | SLC39A3     | 2.596880936  | -0.033975517 | -0.074335745 | 0.040360228  | 0.999933887   | -0.359770841 | -0.409189978 | 0.049419136  | 0.845852696 |
| ENSG000000008130 | NADK        | 9.749815879  | 0.000351641  | 0.016587051  | -0.016235409 | 0.999933887   | 0.141884239  | 0.121664667  | 0.020219572  | 0.845852696 |
| ENSG000000179862 | CITED4      | 1.973016732  | 0.273573621  | 0.100017339  | 0.173556282  | 0.999933887   | 2.264423967  | 2.155712288  | 0.108711679  | 0.845978095 |
| ENSG000000081181 | ARG2        | -0.724913244 | -0.042842176 | 0.079646052  | -0.122488228 | 0.999933887   | 0.264584327  | 0.413490388  | -0.148906062 | 0.846040153 |
| ENSG000000256043 | CTSO        | 1.328694994  | -0.025407382 | -0.187353293 | 0.161945911  | 0.999933887   | -0.117574888 | -0.058198079 | -0.05937681  | 0.846173439 |
| ENSG000000260368 | AC027373.1  | 0.142371194  | 0.190168278  | 0.393749865  | -0.203581586 | 0.999933887   | 0.034048103  | -0.079665463 | 0.113713565  | 0.846185861 |
| ENSG000000179364 | PACS2       | 3.249900223  | 0.03429556   | 0.063995106  | -0.029699546 | 0.999933887   | 0.01395747   | -0.022037503 | 0.035994973  | 0.846185861 |
| ENSG000000204599 | TRIM39      | 4.675339612  | -0.026941626 | 0.016557014  | -0.04349864  | 0.999933887   | 0.190088772  | 0.159330233  | 0.030738539  | 0.846185861 |
| ENSG000000159596 | TMEM69      | 1.384577869  | 0.008725335  | 0.011927686  | -0.003202351 | 0.999933887   | 0.096028553  | 0.055498668  | 0.050478686  | 0.846185861 |
| ENSG000000213930 | GALT        | 2.560787305  | -0.035881948 | 0.152113314  | -0.187995263 | 0.999933887   | 0.026193071  | 0.0475170565 | -0.048977494 | 0.846442621 |
| ENSG000000261245 | AC093502.2  | 3.111455904  | 0.011825796  | 0.097166616  | -0.085340821 | 0.999933887   | 0.017088867  | 0.07041329   | -0.053324423 | 0.846442621 |
| ENSG000000083817 | ZNF416      | -0.309293956 | -0.020639313 | 0.04138708   | -0.062026392 | 0.999933887   | 0.302441165  | -0.401886516 | -0.099445351 | 0.846511676 |
| ENSG000000231527 | FAM27C      | -1.276530719 | 0.078045288  | 0.059068437  | 0.018976831  | 0.999933887   | -0.328783734 | -0.435987957 | 0.107204223  | 0.846765492 |
| ENSG000000248489 | LINC02062   | 1.231053335  | 0.122487169  | 0.202887241  | -0.080400072 | 0.999933887   | 0.413220083  | 0.488143356  | -0.074923273 | 0.846875389 |
| ENSG000000151881 | TMEM267     | 0.353111003  | 0.137076088  | 0.33756449   | -0.200488402 | 0.999933887   | 0.021584987  | 0.117444457  | -0.095859488 | 0.846918163 |
| ENSG000000140451 | PIF1        | -0.403824079 | 0.055577155  | 0.181211291  | -0.125634136 | 0.999933887   | 0.092310601  | 0.230064829  | -0.137754228 | 0.846964686 |
| ENSG000000140988 | RPS2        | 8.213998115  | 0.070103502  | 0.007706852  | 0.06239665   | 0.999933887   | 0.092321108  | 0.057343611  | 0.034937496  | 0.847032    |
| ENSG000000090174 | RG51        | 4.928223245  | -0.059576252 | -0.094137725 | 0.0345611472 | 0.999933887   | -0.022713488 | 0.025256361  | -0.047969849 | 0.847032    |
| ENSG000000250479 | CHCHD10     | 1.698331848  | 0.090454646  | 0.049884241  | 0.040407404  | 0.999933887   | 0.066116946  | 0.135638464  | -0.069516518 | 0.847032    |
| ENSG000000132394 | EEFSEC      | 1.129400735  | 0.089104254  | 0.006329566  | 0.082774688  | 0.999933887   | 0.16834191   | 0.099862761  | 0.088479149  | 0.847032    |
| ENSG000000285534 | AL163541.1  | -0.07847177  | 0.048739995  | -0.000825278 | 0.049565273  | 0.999933887   | 0.04375125   | 0.140788453  | -0.097037203 | 0.847032    |
| ENSG000000211792 | TRAV14DV4   | -0.286831552 | 0.045883006  | 0.132994832  | -0.087111826 | 0.999933887   | 0.284026071  | 0.18774912   | 0.096276951  | 0.847032    |
| ENSG000000120519 | SLC10A5     | 0.760539306  | -0.021446853 | 0.054054026  | -0.075500879 | 0.999933887   | -0.143747627 | -0.06070482  | -0.083042807 | 0.847032    |
| ENSG000000099834 | CDHR5       | 0.5437752    | 0.021684807  | -0.056942409 | 0.081627216  | 0.999933887   | -0.118060978 | 0.0072309    | -0.125291878 | 0.847032    |
| ENSG000000135404 | CD63        | 10.284401809 | 0.001842246  | -0.011200275 | 0.013042522  | 0.999933887   | 0.089567612  | 0.061779924  | 0.027787688  | 0.847032    |
| ENSG000000178404 | CEP295NL    | 3.247866322  | -0.002448577 | 0.001487516  | -0.003936093 | 0.999933887   | -0.844906648 | -0.787650411 | -0.057256236 | 0.847032    |
| ENSG000000130332 | LSM7        | 2.968424268  | 0.001482482  | -0.058646791 | 0.060132273  | 0.999933887   | 0.05992489   | 0.019119474  | 0.040805415  | 0.847032    |
| ENSG000000122188 | LAX1        | 3.220070042  | 0.028170697  | 0.02409508   | 0.004075517  | 0.999933887   | 0.081026014  | 0.118750587  | -0.037724573 | 0.847169072 |
| ENSG000000149179 | C11orf49    | 1.44999256   | 0.089679582  | 0.157477558  | -0.067795977 | 0.999933887   | -0.164820569 | -0.057050387 | 0.047225982  | 0.847225982 |
| ENSG000000185386 | MAPK11      | 0.356046353  | 0.006588588  | 0.033070279  | -0.026843871 | 0.999933887   | 0.310590206  | 0.228494324  | 0.082095882  | 0.847225982 |
| ENSG000000143382 | ADAMTSL4    | 6.209249924  | 0.068338095  | 0.086167128  | -0.002629034 | 0.999933887   | 0.190226374  | 0.154183967  | 0.036042407  | 0.84732579  |
| ENSG000000006125 | AP2B1       | 6.425233825  | -0.046823596 | -0.056778631 | 0.009955036  | 0.999933887   | -0.139558577 | -0.11802559  | -0.027756019 | 0.84732579  |
| ENSG000000120533 | ENY2        | 4.787325874  | 0.038355019  | -0.06760592  | 0.029250901  | 0.999933887   | -0.112115534 | -0.0856834   | -0.026432134 | 0.84732579  |
| ENSG000000179841 | AKAP5       | 0.000521616  | 0.099506594  | 0.359279493  | -0.259772899 | 0.999933887   | -0.119873885 | -0.019282109 | -0.100591776 | 0.84732579  |
| ENSG000000037241 | RPL26L1     | 1.480423717  | -0.035418129 | -0.010005118 | -0.025413011 | 0.999933887   | 0.117034709  | 0.06376571   | 0.05327134   | 0.84732579  |
| ENSG000000196700 | ZNF5102B    | 2.698910201  | 0.029674262  | -0.036078362 | -0.1071131   | 0.999933887   | 0.104819509  | 0.0416348067 | 0.041528558  | 0.847355117 |
| ENSG000000125631 | HTR5BP      | 0.445172578  | 0.096377762  | 0.059194735  | 0.037183027  | 0.999933887   | 0.12128278   | 0.042537987  | 0.078744794  | 0.847375251 |
| ENSG000000028116 | VRK2        | 1.910267306  | -0.113287653 | 0.01391252   | -0.0118964   | 0.999933887   | -0.296204439 | -0.376766674 | 0.080562235  | 0.847810274 |
| ENSG000000109606 | DHX15       | 5.703712606  | -0.08359892  | -0.115308905 | 0.031709986  | 0.999933887   | -0.212807401 | -0.174219296 | -0.038588105 | 0.847834408 |
| ENSG000000243753 | HLA-L       | 4.609554127  | 0.109670108  | 0.07686573   | 0.032804355  | 0.999933887   | 1.178129784  | 1.261657602  | -0.083527819 | 0.847834408 |
| ENSG000000237649 | KIFC1       | -0.660236911 | -0.099209559 | -0.150340749 | 0.051095191  | 0.999933887   | 0.209399848  | 0.054487349  | 0.153912499  | 0.847834408 |
| ENSG000000287095 | AF228727.1  | 1.179865904  | -0.072113078 | 0.129680978  | -0.201794056 | 0.999933887   | -0.709840937 | -0.606219962 | -0.103620976 | 0.847950961 |
| ENSG000000162069 | BICD2L      | -0.356477856 | 0.058690253  | 0.097611625  | -0.038921372 | 0.999933887   | -0.355500111 | -0.495558836 | 0.140056725  | 0.847950961 |
| ENSG000000287185 | AC041005.1  | 1.339513047  | -0.064274528 | -0.029077246 | -0.035197282 | 0.999933887   | -0.553719566 | -0.484765207 | -0.068954359 | 0.848064383 |
| ENSG000000228436 | AL139260.1  | 1.582439681  | 0.022956197  | -0.333305531 | 0.356261728  | 0.999933887   | 0.270512245  | 0.219201482  | 0.051310763  | 0.848192543 |
| ENSG000000136877 | PPG3        | 3.569710818  | 0.046728172  | 0.115089146  | -0.068360973 | 0.999933887   | -0.103505812 | 0.1393777113 | 0.034071302  | 0.848370808 |
| ENSG000000153066 | TXNDC11     | 5.676778937  | -0.016279017 | -0.009677045 | -0.006601971 | 0.999933887   | -0.028050689 | 0.0303094438 | -0.031145127 | 0.848370808 |
| ENSG000000159199 | ATP5MC1     | 1.64300991   | -0.003083151 | 0.143085878  | -0.146169031 | 0.999933887   | 0.2354695    | 0.29397741   | -0.058507929 | 0.848370808 |
| ENSG000000255521 | AL356215.1  | 2.521464606  | 0.143810616  | 0.230382348  | -0.086571731 | 0.999933887   | 2.561831301  | 2.636675671  | -0.07484437  | 0.848378316 |
| ENSG000000104613 | INTS10      | 3.511338586  | 0.000578643  | -0.002241979 | 0.002820622  | 0.999933887   | 0.089971818  | 0.05699126   | 0.032980558  | 0.848378316 |
| ENSG000000160613 | PCSK7       | 5.212731068  | 0.038920903  | 0.038828144  | 9.2759e-05   | 0.999933887   | -0.005199021 | 0.020687968  | -0.025866989 | 0.848939375 |
| ENSG000000235897 | TM4SF19-AS1 | 0.155756439  | -0.077504828 | -0.236365622 | 0.158860793  | 0.999933887   | -0.037564729 | -0.037440316 | 0.075005045  | 0.848939375 |
| ENSG000000109099 | PMP22       | -0.520608422 | -0.187318901 | 0.068487788  | -0.255806689 | 0.999933887   | -0.009470639 | -0.159979649 | -0.159405288 | 0.848972774 |
| ENSG000000151948 | GLT1D1      | 7.96626045   | -0.017298542 | -0.012965057 | -0.004433485 | 0.999933887   | -0.371291617 | -0.398461818 | 0.027170201  | 0.849246891 |
| ENSG000000102034 | ELF4        | 7.40808578   | -0.005609895 | -0.010963992 | 0.005354097  | 0.999933887   | -0.507366774 | -0.480025656 | -0.027341118 | 0.849246891 |
| ENSG000000100852 | ARHGAP5     | 1.563560971  | -0.040891068 | -0.203752055 | 0.162860988  | 0.999933887   | -0.304011903 | -0.194879321 | -0.109132582 | 0.849336503 |
| ENSG000000122674 | CCZ1        | 1.560864059  | 0.032200591  | 0.030077921  | 0.00212167   | 0.999933887   | -0.347622025 | -0.124667531 | 0.064843706  | 0.849990203 |
| ENSG000000054598 | FOXO1       | -0.198459672 | 0.070339193  | 0.109021981  | -0.038682788 | 0.999933887   | 0.113035631  | 0.233392002  | -0.12035637  | 0.850525955 |
| ENSG000000141551 | CSNK1D      | 8.972499483  | -0.009512952 | 0.019385724  | -0.028898676 | 0.999933887   | -0.1570026   | -0.18104053  | 0.02403793   | 0.850525955 |
| ENSG000000124532 | MRS2        | 1.254529905  | -0.100197601 | -0.108183092 | 0.007985492  | 0.999933887   | -0.057707589 | 0.00944002   | -0.067111868 | 0.850564355 |
| ENSG000000136856 | SLC2A8      | 0.64646739   | 0.021271717  | -0.090628393 | 0.11190011   | 0.999933887</ |              |              |              |             |

































|                  |            |              |              |              |              |             |              |              |              |             |
|------------------|------------|--------------|--------------|--------------|--------------|-------------|--------------|--------------|--------------|-------------|
| ENSG00000101126  | ADNP       | 6.075507841  | -0.092286809 | -0.076192885 | -0.016093925 | 0.999933887 | -0.225075443 | -0.234236054 | 0.00916061   | 0.948369196 |
| ENSG00000125835  | SNRPB      | 5.401672773  | -0.007028135 | 0.060897819  | -0.067925955 | 0.999933887 | 0.127522878  | 0.117971012  | 0.00951866   | 0.948380406 |
| ENSG00000184863  | RBM33      | 6.828358958  | -0.003839796 | -0.043427599 | 0.039587803  | 0.999933887 | -0.330438057 | -0.339639387 | 0.00920133   | 0.948380406 |
| ENSG000000051108 | HERPUD1    | 7.147189329  | 0.002125837  | 0.011979746  | -0.00985391  | 0.999933887 | 0.121431201  | 0.10870374   | 0.012727461  | 0.948642698 |
| ENSG00000163479  | SSR2       | 6.151545493  | -0.008515095 | -0.047707261 | 0.039192167  | 0.999933887 | -0.041219005 | -0.050721384 | 0.009502379  | 0.948671892 |
| ENSG00000139428  | MMAB       | 0.447297467  | 0.035210457  | 0.170094088  | -0.134883631 | 0.999933887 | 0.146655975  | 0.175648839  | -0.028992864 | 0.948964044 |
| ENSG000000259431 | THTPA      | 0.386034592  | 0.001095235  | -0.065565608 | 0.066660842  | 0.999933887 | 0.191128961  | 0.156725784  | 0.03403177   | 0.948968457 |
| ENSG00000125844  | RBP1       | 5.241828003  | 0.052928542  | 0.054608397  | -0.001679855 | 0.999933887 | 0.083142361  | 0.094475392  | 0.01133303   | 0.949691277 |
| ENSG00000065665  | SEC61A2    | 4.08124583   | -0.088816596 | 0.055861923  | -0.144678519 | 0.999933887 | -0.200614851 | -0.21192162  | 0.011306769  | 0.949930629 |
| ENSG000000287064 | UXT-AS1    | 0.552757647  | 0.305935294  | 0.198622885  | 0.10731241   | 0.999933887 | 1.164161189  | 1.125871118  | 0.038344071  | 0.949930629 |
| ENSG00000197530  | MB2        | 5.408116767  | 0.12454725   | 0.152748539  | -0.028201289 | 0.999933887 | 0.145787684  | 0.128281851  | 0.017505834  | 0.949930629 |
| ENSG00000160410  | SHKBP1     | 9.067354672  | 0.086881299  | 0.030024955  | 0.056856344  | 0.999933887 | -0.634646276 | -0.646924863 | 0.012278588  | 0.949930629 |
| ENSG000000287317 | AC016769.6 | -0.994876693 | -0.148232751 | 0.087517568  | -0.235750319 | 0.999933887 | 0.353507866  | 0.401916767  | -0.0484089   | 0.949930629 |
| ENSG00000137040  | RANBP6     | 3.117394967  | -0.080558815 | -0.214029231 | 0.133470415  | 0.999933887 | -0.158962278 | -0.179263566 | 0.020301288  | 0.949930629 |
| ENSG000000211714 | TRBV7-3    | -0.857189854 | 0.107262513  | -0.166307366 | 0.273569878  | 0.999933887 | 0.168718581  | 0.207552307  | -0.038833725 | 0.949930629 |
| ENSG00000137776  | SLTM       | 5.459733824  | -0.035156938 | -0.111722706 | 0.076565768  | 0.999933887 | -0.63740783  | -0.658768537 | 0.021360707  | 0.949930629 |
| ENSG00000163131  | CTSS       | 9.984898271  | -0.014181002 | -0.072750568 | 0.058569566  | 0.999933887 | 0.134902739  | 0.124512243  | 0.010390496  | 0.949930629 |
| ENSG00000175931  | UBE2O      | 4.030062305  | 0.008386051  | 0.023194634  | -0.014808583 | 0.999933887 | 0.207142734  | 0.221647051  | 0.014504316  | 0.949930629 |
| ENSG00000172992  | CDKAD      | 1.658979528  | -0.027393888 | -0.046312631 | 0.18918743   | 0.999933887 | -0.079854241 | -0.09710068  | 0.017246439  | 0.950114404 |
| ENSG000000073792 | IGF2BP2    | -0.530078221 | -0.291513305 | -0.224403782 | 0.067109527  | 0.999933887 | -0.245629142 | -0.211488938 | 0.034140204  | 0.950177045 |
| ENSG00000186395  | KRT10      | 2.828936264  | 0.117621652  | 0.061900537  | 0.055721115  | 0.999933887 | 0.008378786  | -0.009440976 | 0.017819761  | 0.950177045 |
| ENSG00000144182  | LIP1       | 0.918490144  | -0.210569856 | -0.170185041 | -0.040384815 | 0.999933887 | 0.23279575   | 0.21023097   | 0.022564779  | 0.950208158 |
| ENSG00000114859  | CLCN2      | -0.017241615 | 0.121206476  | -0.108736695 | 0.22994317   | 0.999933887 | 0.193227614  | 0.225744785  | -0.032517171 | 0.95029206  |
| ENSG00000123719  | CLIC1      | 8.966249035  | 0.039184412  | -0.022369794 | 0.061554205  | 0.999933887 | -0.301693576 | -0.291159972 | 0.010533605  | 0.95029206  |
| ENSG000000223356 | AL590666.1 | -0.792105123 | -0.031183933 | 0.217488688  | -0.248672621 | 0.999933887 | -0.113034298 | -0.170099383 | 0.057065041  | 0.95029206  |
| ENSG00000160856  | FCRL3      | 3.691406517  | 0.01547312   | -0.085529867 | 0.101002986  | 0.999933887 | 0.13753529   | 0.147205794  | -0.009670503 | 0.950293365 |
| ENSG00000197471  | SPN        | 4.601521363  | 0.010538547  | -0.024175315 | 0.034713861  | 0.999933887 | 0.087177491  | 0.098464125  | 0.011286633  | 0.950293365 |
| ENSG000000257599 | OVC1-AS1   | -0.227565496 | -0.215374968 | 0.195820427  | -0.411195394 | 0.999933887 | -0.308671113 | -0.33971686  | 0.031045477  | 0.950563732 |
| ENSG00000114989  | TTL        | 4.1547781306 | -0.091474647 | 0.048354231  | -0.139828878 | 0.999933887 | 1.156515084  | 1.179723008  | 0.019715224  | 0.950563732 |
| ENSG00000180596  | H2BC4      | 5.528492838  | 0.070266897  | -0.012263602 | 0.082530499  | 0.999933887 | 0.06176994   | 0.074903914  | -0.013133975 | 0.950582282 |
| ENSG00000144026  | ZNF514     | 1.189394548  | 0.049547825  | -0.16277504  | 0.212322865  | 0.999933887 | 0.14013024   | 0.119001059  | 0.021129181  | 0.950582282 |
| ENSG00000187514  | PTMA       | 7.536795987  | -0.012329136 | -0.058781069 | 0.046451933  | 0.999933887 | 0.064928496  | 0.05544324   | 0.009485256  | 0.950582282 |
| ENSG00000125991  | ERGIC3     | 4.632905135  | 0.003482339  | -0.014589821 | 0.18072161   | 0.999933887 | 0.003382021  | -0.007524342 | 0.010906364  | 0.950717707 |
| ENSG00000181666  | ZNF763     | 2.423780712  | 0.003855138  | 0.149451532  | -0.145596394 | 0.999933887 | 0.104837749  | 0.120849336  | -0.016011611 | 0.950717707 |
| ENSG00000146282  | RARS2      | 3.496712097  | -0.060549956 | -0.01162903  | -0.048920926 | 0.999933887 | -0.240662617 | -0.251827773 | 0.011165156  | 0.950782583 |
| ENSG00000144199  | FAHD2B     | -0.155053472 | 0.178798788  | -0.211265445 | 0.390064233  | 0.999933887 | 0.190780483  | 0.228014735  | -0.037234253 | 0.950782583 |
| ENSG00000197111  | PCBP2      | 6.674409144  | -0.03592627  | -0.035969551 | -0.025893076 | 0.999933887 | -0.093154215 | -0.100724723 | 0.007570508  | 0.950782583 |
| ENSG00000178229  | ZNF543     | -0.001956869 | -0.157414356 | -0.101594008 | -0.055820348 | 0.999933887 | 0.019584359  | 0.053203661  | -0.033619302 | 0.950934019 |
| ENSG000000221962 | TMEM14EP   | 0.235562102  | 0.160992648  | 0.469874434  | -0.308881786 | 0.999933887 | 0.248632895  | 0.304345953  | -0.055713058 | 0.950934019 |
| ENSG00000172878  | METAP1D    | -0.635517621 | -0.079984285 | 0.164858287  | -0.244842571 | 0.999933887 | -0.120866991 | -0.164343894 | 0.043476903  | 0.950934019 |
| ENSG00000138459  | SLC35A5    | 2.839249428  | 0.019643632  | -0.033828622 | 0.053530254  | 0.999933887 | 0.067960417  | 0.083631787  | 0.01567137   | 0.950934019 |
| ENSG00000173083  | HPSE       | 6.190153325  | -0.019613051 | 0.013779458  | -0.033925508 | 0.999933887 | -1.061155103 | -1.045915171 | -0.015239932 | 0.950934019 |
| ENSG00000171051  | FPR1       | 10.763814614 | 0.011735376  | -0.04111882  | 0.052854196  | 0.999933887 | 0.313509338  | 0.323808387  | -0.01029905  | 0.950934019 |
| ENSG00000101911  | PRPS2      | 1.790133028  | 0.004225424  | -0.029787364 | 0.034203789  | 0.999933887 | 0.060436862  | 0.036218428  | 0.024220254  | 0.950934019 |
| ENSG00000112855  | HARS2      | 4.485481863  | -0.103517905 | -0.038590686 | -0.064927218 | 0.999933887 | -0.077781186 | -0.067548194 | -0.010232991 | 0.950964728 |
| ENSG000000204469 | PRRC2A     | 8.063523218  | 0.037177148  | 0.071526562  | -0.034349414 | 0.999933887 | 0.034046451  | 0.043404581  | -0.009358131 | 0.950964728 |
| ENSG000000098914 | CEP170B    | 0.587479378  | 0.117069159  | 0.142171618  | -0.025102459 | 0.999933887 | 0.052883088  | 0.078277309  | -0.02539422  | 0.951070774 |
| ENSG00000157978  | LDLRAP1    | 3.530036549  | 0.038863138  | 0.03603998   | -0.095697261 | 0.999933887 | 0.002649796  | -0.009248905 | 0.011896701  | 0.951070774 |
| ENSG00000186812  | ZNF397     | 4.716835918  | -0.031832326 | -0.033251542 | 0.001419216  | 0.999933887 | -0.100180076 | -0.111705714 | 0.011525638  | 0.951070774 |
| ENSG00000183508  | TENT5C     | 5.257571096  | -0.054788614 | -0.064493135 | 0.009704521  | 0.999933887 | 0.076096953  | 0.066551968  | 0.009544984  | 0.951157019 |
| ENSG00000147316  | MCPH1      | 3.130193499  | 0.028784372  | 0.07565032   | -0.046865949 | 0.999933887 | 0.07235484   | 0.79741412   | -0.025059284 | 0.951157019 |
| ENSG000000213203 | GIMAP1     | 2.846204191  | 0.106703834  | 0.04922279   | 0.057481044  | 0.999933887 | 0.140281715  | 0.12520044   | 0.015081276  | 0.951162738 |
| ENSG00000122035  | RASL11A    | -0.303597833 | 0.134295957  | 0.325388756  | -0.191072798 | 0.999933887 | 0.353938701  | 0.024211266  | 0.042412174  | 0.951554843 |
| ENSG000000274717 | AL049757.1 | 0.790239698  | 0.187557621  | 0.2579874    | -0.07042978  | 0.999933887 | 1.396951873  | 1.373468656  | 0.023483217  | 0.951610098 |
| ENSG00000177875  | CCDC184    | -0.24748119  | 0.033960414  | 0.070383856  | -0.036423443 | 0.999933887 | 0.237034805  | 0.196183739  | 0.040851066  | 0.951610098 |
| ENSG00000100100  | PIK3P1     | 7.480890107  | 0.009720587  | 0.002276451  | 0.007444136  | 0.999933887 | 0.497603119  | 0.508638825  | -0.011035706 | 0.951610098 |
| ENSG00000198420  | TCAF1      | -0.019385217 | 0.028534001  | -0.299552348 | 0.328086346  | 0.999933887 | -0.05014099  | -0.079906581 | 0.029765591  | 0.951610098 |
| ENSG000000241351 | IGKV3-11   | -1.309942081 | -0.035238113 | -0.085120508 | 0.049882395  | 0.999933887 | 0.441680674  | 0.386954278  | 0.054726396  | 0.951610098 |
| ENSG00000120784  | ZFP30      | 0.076974974  | -0.14095253  | 0.014206665  | -0.242373196 | 0.999933887 | -0.094292352 | -0.132159405 | 0.037867053  | 0.951691008 |
| ENSG000000259448 | LINC02352  | 1.341017948  | 0.020682125  | 0.103174205  | -0.08249208  | 0.999933887 | -0.147331126 | -0.1189486   | -0.028382526 | 0.951691008 |
| ENSG00000155659  | VSIG4      | -0.859669974 | 0.063789615  | 0.462885614  | -0.399095998 | 0.999933887 | 0.116961192  | 0.059552921  | 0.057408272  | 0.951736392 |
| ENSG00000134440  | NARS1      | 6.06765241   | -0.070519751 | -0.091052375 | 0.202532624  | 0.999933887 | -0.220017419 | -0.231444373 | 0.011426953  | 0.951737716 |
| ENSG000000079308 | TNS1       | -0.379798344 | -0.003265726 | 0.396882454  | -0.400148181 | 0.999933887 | -0.388431411 | -0.354294673 | 0.034136739  | 0.951737716 |
| ENSG000000074803 | SLC12A1    | -0.076391963 | -0.211042373 | -0.093843754 | -0.117198619 | 0.999933887 | -0.16999544  | -0.11347845  | -0.05651699  | 0.951770366 |
| ENSG00000185885  | IFITM1     | 6.947365428  | 0.132888042  | 0.02236676   | 0.101521282  | 0.999933887 | 0.06690853   | 0.049291552  | 0.017616978  | 0.951940223 |
| ENSG00000169019  | COMMD8     | 2.484526587  | -0.132439271 | -0.230306417 | 0.097867147  | 0.999933887 | -0.516008129 | -0.535239364 | 0.019231511  | 0.951940223 |
| ENSG00000107331  | ABCA2      | 6.582464586  | 0.059700842  | 0.058098254  | 0.001602588  | 0.999933887 | 0.151193341  | 0.160377031  | -0.009183697 | 0.951940223 |
| ENSG00000127191  | TRAF2      | 2.926025359  | 0.068234902  | 0.071948796  | -0.003713894 | 0.999933887 | 0.242440244  | 0.229863825  | 0.012576419  | 0.951940223 |
| ENSG000000211592 | IGKC       | 3.475080115  | 0.059808647  | -0.131980861 | 0.191769508  | 0.999933887 | 0.31414972   | 0.298828265  | 0.015321456  | 0.951940223 |
| ENSG00000155522  | PI4KA2     | 4.309150847  | -0.040099387 | -0.023249119 | -0.016850267 | 0.999933887 | -0.321267846 | -0.30885032  | -0.012417526 | 0.951940223 |
| ENSG00000112297  | CRYBG1     | 6.1811749    | -0.049004945 | -0.082546716 | 0.03354177   | 0.99993388  |              |              |              |             |

|                  |            |              |              |              |              |             |               |               |              |             |
|------------------|------------|--------------|--------------|--------------|--------------|-------------|---------------|---------------|--------------|-------------|
| ENSG000000273111 | LYPD4      | -1.2861978   | 0.034485933  | -0.218309797 | 0.252795729  | 0.999933887 | -0.946746124  | -1.029888194  | 0.08314207   | 0.952832992 |
| ENSG000000235505 | CASP4P     | 0.99182953   | -0.033737878 | -0.168025869 | 0.130647992  | 0.999933887 | 0.034194228   | 0.013750802   | 0.020443426  | 0.953012139 |
| ENSG000000162390 | ACOT11     | -0.573281027 | -0.02330739  | 0.222160415  | -0.198853025 | 0.999933887 | -0.239403189  | -0.197182183  | 0.042221007  | 0.953012139 |
| ENSG000000179899 | PHC1P1     | 0.217631268  | 0.176002139  | 0.013784913  | 0.162217226  | 0.999933887 | -0.209084458  | -0.190131359  | -0.018953098 | 0.953171152 |
| ENSG000000132689 | RIN2       | 0.766146471  | 0.05501205   | -0.006961332 | 0.061973382  | 0.999933887 | 1.06630712    | 1.042238098   | 0.024069022  | 0.95325376  |
| ENSG000000146232 | NFKBIE     | 0.7075156974 | -0.044376713 | -0.017139586 | -0.027237128 | 0.999933887 | 1.96054015    | 1.977207425   | -0.016667275 | 0.953456245 |
| ENSG000000134594 | RAB3A      | 0.580379733  | 0.033263954  | -0.149999518 | 0.183263472  | 0.999933887 | -0.165592848  | -0.192374365  | 0.026781517  | 0.953627819 |
| ENSG000000079974 | RABL2B     | 2.320610207  | 0.016152104  | -0.093722534 | 0.109874638  | 0.999933887 | -0.103672985  | -0.088212606  | -0.015456925 | 0.953627819 |
| ENSG000000165782 | PIP4P1     | 8.069305057  | 0.104164523  | 0.129304952  | -0.025140429 | 0.999933887 | 0.291122675   | 0.303927569   | -0.012804924 | 0.953653605 |
| ENSG000000111729 | CLEC4A     | 1.761790711  | -0.068956539 | -0.07944051  | 0.012447991  | 0.999933887 | 0.102430191   | 0.102962797   | 0.022220563  | 0.953653605 |
| ENSG000000164300 | SERINC5    | 5.195212339  | -0.019340779 | 0.014613557  | -0.033954336 | 0.999933887 | -0.424636544  | -0.414754509  | -0.009882035 | 0.953653605 |
| ENSG000000259326 | AC116158.1 | -0.471181288 | 0.038219195  | -0.092238484 | 0.13045768   | 0.999933887 | 0.176766772   | 0.136138807   | 0.040627965  | 0.953653605 |
| ENSG000000105851 | PIK3CG     | 5.832044453  | -0.028694103 | 0.005642677  | -0.034336781 | 0.999933887 | -0.20931796   | -0.199754349  | -0.009563612 | 0.953854675 |
| ENSG000000185052 | SLC24A3    | 0.648466014  | -0.065735605 | 0.100522847  | -0.166258452 | 0.999933887 | -0.200378873  | -0.174935857  | -0.025443015 | 0.953952022 |
| ENSG000000231793 | DOC2G      | -1.191617383 | 0.314134772  | 0.05408993   | 0.260044842  | 0.999933887 | 0.192356885   | 0.147824022   | 0.044532863  | 0.954069513 |
| ENSG000000286020 | AC011997.2 | -1.021951772 | 0.30245517   | -0.206362219 | 0.508817389  | 0.999933887 | 1.068090401   | 1.020360245   | 0.045730156  | 0.954069513 |
| ENSG000000256937 | KRT17P8    | -0.297520342 | 0.126936419  | 0.34555903   | -0.218622611 | 0.999933887 | 0.064179351   | 0.02998942    | 0.034189931  | 0.954069513 |
| ENSG000000106245 | BUD31      | 4.270342774  | 0.025709348  | -0.062858695 | 0.054589042  | 0.999933887 | 0.058843334   | 0.068975346   | -0.010132012 | 0.954069513 |
| ENSG000000151458 | ANKRD50    | 2.064952661  | 0.034887801  | -0.053802799 | 0.0886906    | 0.999933887 | -0.371512415  | -0.389736089  | 0.018223674  | 0.954069513 |
| ENSG000000132950 | ZMYM5      | 2.737363725  | -0.017764201 | -0.005325409 | 0.012438791  | 0.999933887 | -0.353670421  | -0.368770335  | 0.015099574  | 0.954069513 |
| ENSG000000085831 | TTTC39A    | 1.476823831  | 0.04854969   | 0.111018877  | -0.062469187 | 0.999933887 | 0.305751697   | 0.33032113    | -0.024569433 | 0.954394965 |
| ENSG000000256576 | LINC02361  | 0.361449575  | 0.12227563   | -0.336319027 | 0.458594657  | 0.944094537 | -0.089756795  | -0.069166599  | 0.020587136  | 0.954498985 |
| ENSG000000279227 | AC009303.4 | 5.358437322  | -0.113702686 | -0.089016766 | -0.02468592  | 0.999933887 | -0.348220352  | -0.361005002  | 0.01278465   | 0.955195438 |
| ENSG000000176108 | CHMP6      | 2.275278155  | 0.038966331  | -0.134201989 | 0.17316832   | 0.999933887 | -0.176422439  | -0.19123898   | 0.01481654   | 0.955195438 |
| ENSG000000135446 | CDK4       | 2.49177992   | 0.027722013  | 0.031222269  | -0.003500257 | 0.999933887 | 0.073409225   | 0.059238643   | 0.014170583  | 0.955195438 |
| ENSG000000134590 | RTL8C      | 2.6365341    | 0.005443247  | -0.003867975 | 0.009311221  | 0.999933887 | -0.0345938    | -0.018836862  | -0.015755118 | 0.955195438 |
| ENSG000000034693 | PEX3       | 0.051701522  | -0.182294337 | -0.389449836 | 0.207155499  | 0.999933887 | 0.132607714   | 0.159048177   | 0.026440463  | 0.955197879 |
| ENSG000000112685 | EXOC2      | 3.332522901  | 0.011413675  | -0.118915171 | 0.130328846  | 0.999933887 | -0.017845235  | -0.027971988  | 0.010126753  | 0.955197879 |
| ENSG000000102878 | HSF4       | 1.0277792914 | 0.028219273  | 0.078180725  | -0.047960942 | 0.999933887 | 0.044659744   | -0.077174678  | 0.027114935  | 0.955256161 |
| ENSG000000107581 | EIF3A      | 6.784708862  | -0.047844777 | -0.104049384 | 0.056204607  | 0.999933887 | -0.21689112   | -0.229241936  | 0.012350816  | 0.95526546  |
| ENSG000000113763 | UNC5A      | 1.107843374  | -0.031839587 | 0.070769013  | -0.1026086   | 0.999933887 | 0.356347881   | 0.398884956   | -0.042537075 | 0.95526546  |
| ENSG000000005469 | CROT       | 0.867112551  | -0.080360513 | 0.011007673  | -0.091368186 | 0.999933887 | -0.172338407  | -0.196870864  | 0.024532456  | 0.955513525 |
| ENSG000000256269 | HMB5       | 0.007134343  | 0.077906601  | 0.0116264    | 0.066280201  | 0.999933887 | 0.091439355   | 0.125064393   | -0.033625038 | 0.955628484 |
| ENSG000000007047 | MARK4      | 4.774657848  | 0.004776495  | 0.05056112   | -0.045784625 | 0.999933887 | 0.00657481    | -0.010094224  | 0.055652226  | 0.955652226 |
| ENSG000000186153 | WWOX       | 0.163718045  | -0.166750747 | 0.043127555  | -0.209878302 | 0.999933887 | 0.065652948   | 0.098530965   | -0.032878017 | 0.955664934 |
| ENSG000000133678 | TMEM254    | -0.301230958 | -0.115464226 | -0.188023425 | 0.072559199  | 0.999933887 | 0.205345832   | 0.244037412   | -0.03869158  | 0.955666426 |
| ENSG000000223580 | AL513523.1 | 0.252280885  | 0.169010986  | -0.048200113 | 0.217211098  | 0.999933887 | 0.062730385   | 0.094269279   | -0.031538894 | 0.955898814 |
| ENSG000000233013 | FAM157B    | 2.514344862  | 0.076424602  | -0.119966936 | 0.196391598  | 0.999933887 | 0.604601623   | 0.585130596   | 0.019471027  | 0.956205902 |
| ENSG000000139579 | NABP2      | 1.152150043  | -0.089687718 | 0.068790131  | -0.15847785  | 0.999933887 | 0.083593874   | 0.06278377    | 0.020811014  | 0.956205902 |
| ENSG000000203739 | PRDX6-AS1  | 1.985028663  | -0.044875501 | -0.114556399 | 0.069681438  | 0.999933887 | 0.408791368   | 0.389979198   | 0.018812174  | 0.956205902 |
| ENSG000000125170 | DOK4       | 0.585395277  | -0.045662437 | 0.006930275  | -0.052592712 | 0.999933887 | -0.039287696  | -0.097078999  | 0.039789203  | 0.956292034 |
| ENSG000000161405 | IKZF3      | 5.114291519  | -0.051666579 | 0.033706589  | -0.085373168 | 0.999933887 | 0.135200972   | 0.143479045   | -0.008278073 | 0.956366357 |
| ENSG000000263167 | AC115099.1 | 0.72838292   | -0.073870532 | 0.207295155  | -0.281165688 | 0.999933887 | 0.5670577     | 0.537403204   | 0.029654497  | 0.956366357 |
| ENSG000000136261 | BZW2       | 1.686352472  | -0.042812515 | -0.090187667 | 0.047375152  | 0.999933887 | 0.287553746   | 0.269088725   | -0.018465021 | 0.956390782 |
| ENSG000000287736 | PTCSC1     | 3.437260763  | -0.035042068 | 0.048527191  | -0.08356926  | 0.999933887 | 0.022892997   | 0.042111562   | -0.019213262 | 0.956430829 |
| ENSG000000235820 | AL109935.1 | -0.101047489 | -0.178921907 | -0.1616471   | -0.017280037 | 0.999933887 | 0.07614578    | 0.109784581   | -0.033639701 | 0.956479179 |
| ENSG000000238086 | PPP1R26P1  | -0.486808977 | -0.13037134  | 0.013830389  | -0.14420173  | 0.999933887 | -0.11980995   | -0.158046195  | 0.038065245  | 0.956479179 |
| ENSG000000089327 | FXYD5      | 5.929658042  | -0.02370608  | -0.021888651 | -0.08117429  | 0.999933887 | 0.040727864   | 0.049922288   | 0.009194424  | 0.956479179 |
| ENSG000000257704 | INAFM1     | 4.251261442  | 0.16872793   | 0.124536587  | 0.044191343  | 0.999933887 | -0.011375233  | -0.026625489  | 0.015250256  | 0.956710356 |
| ENSG000000171428 | NAT1       | 2.075735854  | -0.140488717 | -0.135488685 | -0.004980032 | 0.999933887 | -0.219051066  | -0.202398419  | -0.016652647 | 0.956710356 |
| ENSG000000133751 | SLCO5A1    | -0.191982202 | -0.108801423 | 0.062552761  | -0.171354184 | 0.999933887 | 2.015892726   | 2.053959764   | -0.038067038 | 0.956710356 |
| ENSG000000119640 | ACYP1      | -0.317879113 | -0.06408025  | -0.256640042 | 0.192559791  | 0.999933887 | 0.096448164   | 0.130049024   | -0.03360086  | 0.956710356 |
| ENSG000000260378 | AC109597.1 | -0.61572208  | -0.244598085 | 0.04791073   | -0.292508814 | 0.999933887 | -0.277351783  | -0.218344138  | -0.059007645 | 0.956749439 |
| ENSG000000058729 | RIOK2      | 1.182762935  | -0.130313658 | -0.35426998  | 0.223956322  | 0.999933887 | 0.012901455   | 0.03638304    | -0.023481584 | 0.956749439 |
| ENSG000000168522 | FNTA       | 4.5657756    | -0.060918535 | 0.001600807  | -0.062519342 | 0.999933887 | 0.076875934   | 0.066536764   | 0.01033917   | 0.956749439 |
| ENSG000000141837 | CACNA1A    | 1.51844025   | -0.094540283 | -0.023815152 | -0.070725131 | 0.999933887 | -0.781495368  | 0.028971438   | 0.056749439  | 0.956749439 |
| ENSG000000277425 | AL121890.4 | 0.316412474  | 0.174213065  | 0.0137075    | 0.160505564  | 0.999933887 | 0.441999832   | 0.469225098   | -0.027225266 | 0.956749439 |
| ENSG000000165272 | AQP3       | 2.878578135  | 0.039525227  | 0.086024512  | -0.046499284 | 0.999933887 | 0.081466032   | 0.014221725   | 0.056749439  | 0.956749439 |
| ENSG000000127580 | WDR24      | 1.929842512  | 0.052043908  | 0.012202145  | 0.039841763  | 0.999933887 | -0.081566848  | -0.098694735  | 0.017127887  | 0.956749439 |
| ENSG000000207034 | _Y_RNA     | 1.054091437  | 0.059274004  | 0.20297745   | -0.143703046 | 0.999933887 | -0.1061390651 | -0.04471833   | 0.056749439  | 0.956749439 |
| ENSG000000136631 | VPS45      | 1.297112564  | 0.034691161  | -0.319090476 | 0.353781637  | 0.999933887 | -0.049048817  | -0.067263643  | 0.018214826  | 0.956749439 |
| ENSG000000165271 | NOL6       | 3.506215694  | 0.003380584  | 0.067580511  | -0.064179927 | 0.999933887 | 0.246103698   | 0.257116226   | -0.011012528 | 0.956749439 |
| ENSG000000136045 | PWP1       | 2.76203156   | -0.076056609 | -0.186166555 | 0.110050046  | 0.999933887 | 0.08474347    | 0.015248192   | 0.056778693  | 0.956778693 |
| ENSG000000243022 | MARK3P3    | -0.653778673 | 0.035961747  | 0.596900344  | -0.560933857 | 0.999933887 | 0.587106027   | 0.620209713   | -0.033103686 | 0.956914367 |
| ENSG000000146112 | PPP1R18    | 9.294429288  | 0.04765557   | 0.047427591  | -0.006662034 | 0.999933887 | 0.179495786   | 0.009178855   | 0.95708171   | 0.95708171  |
| ENSG000000233406 | AL162430.1 | 0.05864476   | -0.042894156 | 0.112390031  | -0.155203187 | 0.999933887 | 0.09517443    | 0.130187711   | -0.035013281 | 0.95708171  |
| ENSG000000164347 | GFM2       | 2.376921961  | -0.136636666 | -0.03118232  | -0.105454346 | 0.999933887 | -0.334899175  | -0.0474643301 | 0.014744126  | 0.957107861 |
| ENSG000000260997 | AC004847.1 | 1.843053088  | -0.008135866 | -0.159400797 | 0.151264931  | 0.999933887 | 0.18431365    | 0.207900329   | -0.023586679 | 0.957130746 |
| ENSG000000116922 | C1orf109   | 1.119016562  | 0.107382353  | 0.011397306  | 0.095985048  | 0.999933887 | 0.124334752   | 0.142581083   | -0.018246331 | 0.957182044 |
| ENSG000000130005 | GAMT       | 0.246428895  | -0.061611145 | 0.021844431  | -0.083455576 | 0.999933887 | -0.03516921   | -0.029477112  | 0.957182044  | 0.957182044 |
| ENSG000000073464 | CLCN4      | 1.2549585061 | -0.006644863 | -0.000753207 | -0.005891656 | 0.999       |               |               |              |             |

|                  |             |              |               |              |              |             |              |              |              |             |
|------------------|-------------|--------------|---------------|--------------|--------------|-------------|--------------|--------------|--------------|-------------|
| ENSG00000179387  | ELMOD2      | 2.652980753  | -0.074059098  | -0.053641159 | -0.020417939 | 0.999933887 | -0.629950478 | -0.613953997 | -0.01599648  | 0.958487536 |
| ENSG00000044819  | MAP4        | 4.593931575  | -0.009850777  | -0.018464301 | 0.008613523  | 0.999933887 | 0.055728517  | 0.047293146  | 0.008435371  | 0.958487536 |
| ENSG00000143710  | C1orf162    | 3.536888457  | 0.009431861   | -0.016943706 | 0.026375567  | 0.999933887 | 0.009992008  | -0.001582194 | 0.011584202  | 0.958487536 |
| ENSG00000100916  | BRMS1L      | -0.215064073 | -0.304144912  | -0.115589205 | -0.188555707 | 0.999933887 | -0.224083373 | -0.18081921  | -0.043264163 | 0.958618737 |
| ENSG000000281490 | C1CIP14     | 3.50104191   | 0.055249443   | 0.062466505  | -0.007217062 | 0.999933887 | -0.098417233 | -0.087120235 | -0.011296998 | 0.958618737 |
| ENSG000000088035 | ALG6        | 1.983562901  | -0.075876902  | -0.079773201 | 0.003896299  | 0.999933887 | -0.276695841 | -0.259789494 | -0.016906348 | 0.958618737 |
| ENSG000000241837 | ATP5PO      | 1.729640678  | 0.029614753   | 0.160655501  | -0.131040748 | 0.999933887 | 0.079318295  | 0.094989444  | -0.015671149 | 0.958618737 |
| ENSG000000162972 | MAIP1       | 0.725024601  | -0.274406471  | -0.187126586 | -0.087279885 | 0.999933887 | 0.051040948  | -0.072259071 | -0.021218123 | 0.959258777 |
| ENSG000000186272 | ZNF17       | -0.042816641 | -0.304689347  | -0.152633276 | -0.15206007  | 0.999933887 | -0.040763124 | -0.013019159 | -0.027743965 | 0.959258777 |
| ENSG000000229719 | MIR194-2HG  | 2.037473988  | 0.166009483   | 0.101329418  | 0.054680065  | 0.999933887 | 1.288788325  | 0.022919647  | 0.959258777  |             |
| ENSG000000121210 | TMEM131L    | 5.709284529  | -0.079031605  | -0.026270009 | -0.052761596 | 0.999933887 | -0.219170657 | -0.211622375 | -0.007548282 | 0.959258777 |
| ENSG000000229769 | TRBV10-2    | -1.479499369 | -0.199325819  | 0.01611142   | -0.21543724  | 0.999933887 | 0.273349035  | 0.239137284  | 0.034211751  | 0.959258777 |
| ENSG000000142319 | SLC6A3      | -0.363975511 | 0.26262269    | 0.926745165  | -0.664122475 | 0.999933887 | 1.562352058  | 1.59433647   | -0.031984412 | 0.959258777 |
| ENSG000000130164 | LDLR        | 3.813174872  | 0.051044542   | 0.181721121  | -0.130676578 | 0.999933887 | 0.132289991  | 0.144722238  | -0.012432246 | 0.959258777 |
| ENSG000000171033 | PKIA        | 0.612795967  | -0.089897735  | 0.176180986  | -0.266078722 | 0.999933887 | 0.04806788   | 0.067567974  | -0.019500093 | 0.959258777 |
| ENSG000000152556 | PFKM        | 1.099795197  | -0.061036026  | 0.135144432  | -0.196177459 | 0.999933887 | 0.372019756  | 0.391052817  | -0.01903306  | 0.959258777 |
| ENSG000000197808 | ZNF461      | 0.098243015  | -0.07368976   | 0.117001444  | -0.190691223 | 0.999933887 | 0.038190151  | 0.013979451  | 0.024210699  | 0.959258777 |
| ENSG000000211817 | TRAV38-2DV8 | 1.089339241  | 0.098432564   | -0.177166843 | 0.275599407  | 0.999933887 | 0.194975776  | 0.155161316  | 0.03981446   | 0.959258777 |
| ENSG000000157895 | C12orf43    | 1.578137883  | -0.048166257  | -0.075562211 | 0.027395955  | 0.999933887 | 0.080990555  | 0.0618074    | 0.019183154  | 0.959258777 |
| ENSG000000079215 | SLC1A3      | 0.428916103  | 0.098486025   | 0.003679214  | 0.094806811  | 0.999933887 | 1.147777838  | 1.124298308  | 0.023480073  | 0.959258777 |
| ENSG000000122741 | DCAF10      | 3.243807464  | -0.029337203  | -0.044969705 | 0.015632503  | 0.999933887 | -0.482713711 | -0.495336672 | 0.012624961  | 0.959258777 |
| ENSG000000176407 | KCMF1       | 6.312329554  | -0.01637994   | 0.010344209  | -0.026724149 | 0.999933887 | -0.225874232 | 0.006648237  | 0.959258777  |             |
| ENSG000000135966 | TGFBRAP1    | 3.639367467  | -0.049314685  | 0.056167816  | -0.105482301 | 0.999933887 | 0.598039583  | 0.617936988  | -0.019897405 | 0.959258777 |
| ENSG000000164172 | MOC52       | 1.349327641  | -0.038633425  | -0.001756924 | -0.036876501 | 0.999933887 | -0.000989354 | -0.019927421 | 0.018938067  | 0.959258777 |
| ENSG000000139433 | GLTP        | 5.432490904  | -0.025197925  | -0.0558168   | 0.030383754  | 0.999933887 | -0.912605899 | -0.925656377 | 0.013050477  | 0.959258777 |
| ENSG000000100347 | SAMM50      | 2.024987924  | 0.03283318    | 0.046797377  | -0.013964198 | 0.999933887 | 0.077821488  | 0.096044931  | -0.018223442 | 0.959258777 |
| ENSG000000034053 | APBA2       | 3.093218551  | -0.013350571  | -0.091310466 | 0.077959895  | 0.999933887 | 0.045006665  | 0.011799728  | 0.959258777  |             |
| ENSG000000169047 | IRS1        | 0.074036421  | -0.022010744  | 0.057448751  | -0.079459495 | 0.999933887 | 0.087889405  | 0.109983621  | -0.022094216 | 0.959258777 |
| ENSG000000196465 | MYL6B       | -0.63562318  | -0.019820164  | -0.093682181 | 0.073862017  | 0.999933887 | -0.082205986 | -0.049672887 | -0.032533099 | 0.959258777 |
| ENSG000000185920 | PTCH1       | 2.335502008  | 0.005459795   | -0.029891107 | 0.035350902  | 0.999933887 | -0.044345449 | -0.03062572  | -0.01371973  | 0.959258777 |
| ENSG000000124444 | ZNF576      | 0.754824101  | -0.045890289  | 0.305458703  | -0.351348992 | 0.999933887 | -0.178574094 | -0.199702228 | 0.021128134  | 0.959313113 |
| ENSG000000162572 | SCNN1D      | 0.313990638  | -0.001364957  | -0.18906422  | 0.187731465  | 0.999933887 | 0.155199178  | 0.178977018  | -0.02377784  | 0.959341423 |
| ENSG000000136383 | ALPK3       | 0.633549766  | 0.141060299   | 0.059455944  | 0.081604355  | 0.999933887 | -0.218708705 | -0.246798748 | 0.028090043  | 0.959423082 |
| ENSG000000105722 | ERF         | 6.842198799  | 0.079366723   | 0.068618717  | 0.012748007  | 0.999933887 | -0.453019989 | -0.443660577 | 0.009359412  | 0.959423082 |
| ENSG000000134575 | ACP2        | 1.772753864  | -0.074491468  | -0.033480001 | -0.041011468 | 0.999933887 | 0.21701455   | 0.231225794  | -0.014211244 | 0.959423082 |
| ENSG000000008838 | MED24       | 3.248970069  | -0.024849158  | -0.005158842 | -0.019690316 | 0.999933887 | 0.186818025  | 0.195421669  | -0.008603645 | 0.959423082 |
| ENSG000000010310 | GIPR        | 1.817142819  | -0.042722705  | 0.013587443  | -0.056310148 | 0.999933887 | 0.012582784  | 0.02671904   | -0.014136256 | 0.959628071 |
| ENSG000000159788 | RGS12       | 2.051052712  | -0.085753016  | 0.239371684  | -0.3251247   | 0.999933887 | -0.362905096 | -0.349493155 | -0.013411941 | 0.959811224 |
| ENSG000000278558 | TMEM191B    | -1.783320353 | -0.0718320353 | -0.078385836 | 0.093809619  | 0.999933887 | -0.271734108 | -0.226136436 | -0.045597672 | 0.959811224 |
| ENSG000000006451 | RALA        | 2.672356815  | -0.003737759  | -0.133706298 | 0.129968539  | 0.999933887 | -0.092570365 | -0.080710484 | -0.011859881 | 0.959811224 |
| ENSG000000219665 | ZNF433-AS1  | 3.2036895    | -0.199925525  | 0.067616938  | -0.267542463 | 0.999933887 | -0.42739826  | -0.439705075 | 0.012306815  | 0.960131867 |
| ENSG000000096717 | SIRT1       | 5.63951753   | 0.034728428   | 0.037457182  | -0.002730754 | 0.999933887 | -0.203458995 | -0.213209774 | 0.00975078   | 0.960131867 |
| ENSG000000106803 | SEC61B      | 4.450254093  | 0.057217811   | -0.001606843 | 0.058824654  | 0.999933887 | 0.039325315  | 0.047850433  | -0.008525117 | 0.960267872 |
| ENSG000000269001 | AC092070.2  | 3.126567959  | -0.058412437  | -0.014142623 | -0.044269815 | 0.999933887 | -0.379819608 | -0.390554528 | 0.01072582   | 0.960267872 |
| ENSG000000124571 | XPO5        | 2.742825691  | -0.051846706  | 0.153758958  | -0.205605664 | 0.999933887 | 0.044884976  | 0.032411857  | 0.012473118  | 0.960267872 |
| ENSG000000138376 | BARD1       | 0.338797411  | 0.052886327   | 0.133643766  | -0.080577438 | 0.999933887 | -0.15558374  | -0.128232167 | -0.027360578 | 0.960267872 |
| ENSG000000096872 | IFT74       | -0.126209336 | -0.240965067  | 0.128615518  | -0.369580585 | 0.999933887 | -0.111540393 | -0.080243451 | -0.031296942 | 0.960333497 |
| ENSG000000258484 | SPEF1       | -0.495068348 | 0.232264258   | 0.319642419  | -0.087378161 | 0.999933887 | 0.958682621  | 0.029477261  | 0.960333497  |             |
| ENSG000000168792 | ABHD15      | 1.760108207  | 0.079008369   | -0.111830341 | 0.190838711  | 0.999933887 | 0.042192836  | 0.056453768  | -0.014260932 | 0.960333497 |
| ENSG000000168303 | MPLKIP      | 2.632626559  | 0.002101436   | -0.089680372 | 0.091781808  | 0.999933887 | -0.273398939 | -0.284622339 | 0.0112234    | 0.960333497 |
| ENSG000000115561 | CHMP3       | 5.484139388  | -0.000649176  | -0.03383816  | 0.033188984  | 0.999933887 | -0.313674801 | -0.322000593 | 0.008331253  | 0.960355425 |
| ENSG000000137806 | NDUFAF1     | 1.952048566  | -0.127434994  | -0.332711326 | 0.205276332  | 0.999933887 | -0.514367719 | -0.527192675 | 0.012824955  | 0.960525977 |
| ENSG000000160298 | C21orf58    | -0.661721188 | -0.165627194  | -0.027429468 | -0.138197726 | 0.999933887 | -0.191419968 | -0.168082862 | -0.030617086 | 0.960525977 |
| ENSG000000164002 | EXO5        | 0.153120094  | -0.126821835  | -0.084269063 | -0.042552772 | 0.999933887 | 0.1441967    | 0.12040013   | 0.02379657   | 0.960525977 |
| ENSG000000218510 | LINC00339   | -0.546328119 | 0.071259502   | 0.019327791  | 0.051931711  | 0.999933887 | -0.26769609  | -0.299834343 | 0.032138253  | 0.960525977 |
| ENSG000000001497 | LAS1L       | 2.763655437  | -0.110483132  | -0.021738037 | -0.088745095 | 0.999933887 | 0.17338929   | -0.018421782 | -0.010822492 | 0.960843497 |
| ENSG000000142408 | CACNG8      | 1.261550404  | -0.092098508  | 0.092704513  | -0.184803021 | 0.999933887 | -0.117101339 | -0.1322545   | 0.015153161  | 0.960843497 |
| ENSG000000137936 | BCAR3       | 0.588051439  | 0.163634722   | -0.331009218 | 0.49464394   | 0.999933887 | -0.371712583 | -0.393152667 | -0.01440084  | 0.960843497 |
| ENSG000000185513 | L3MBTL1     | 0.615905768  | -0.040380747  | 0.185317999  | -0.225698746 | 0.999933887 | -0.163402464 | -0.137534403 | -0.025868062 | 0.960843497 |
| ENSG000000234493 | RHOXF1P1    | -1.120934734 | 0.07559817    | -0.578804553 | 0.654402723  | 0.999933887 | -0.102648956 | -0.06280719  | -0.039841766 | 0.960890678 |
| ENSG000000126267 | COX6B1      | 5.375820194  | 0.05483387    | 0.00113521   | 0.05369886   | 0.999933887 | 0.034024064  | 0.025412525  | 0.008611538  | 0.961031371 |
| ENSG000000128891 | CCDC32      | 2.786830075  | 0.057488289   | -0.021882267 | 0.079370556  | 0.999933887 | 0.030441455  | 0.041397373  | -0.010956118 | 0.961035681 |
| ENSG000000033170 | FUT8        | 1.259329063  | 0.06478196    | -0.037400964 | 0.102182924  | 0.999933887 | -0.059532779 | -0.040383892 | -0.019494387 | 0.961178159 |
| ENSG000000272037 | AP002907.1  | 1.323196954  | 0.130546706   | 0.154366591  | -0.014819885 | 0.999933887 | -0.255991207 | -0.235866598 | -0.020124249 | 0.961366765 |
| ENSG000000130958 | SLC35D2     | 0.196631353  | 0.232322223   | -0.099131006 | 0.331453229  | 0.999933887 | 0.044894485  | 0.028206329  | 0.961624303  |             |
| ENSG000000163121 | NEURL3      | -0.652588066 | 0.225148885   | 0.481847462  | -0.256698578 | 0.999933887 | 3.405135506  | 3.366400697  | 0.03873481   | 0.961624303 |
| ENSG000000142784 | WDR1C1      | 6.770369892  | 0.040434581   | 0.002345428  | 0.0380983    | 0.999933887 | 0.352977498  | 0.34529554   | 0.007681958  | 0.961623308 |
| ENSG000000157833 | GAREM2      | -0.503051278 | 0.267356797   | 0.065540227  | 0.20181657   | 0.999933887 | 0.146224211  | 0.178333138  | -0.032108928 | 0.961692047 |
| ENSG000000213782 | DDX47       | 0.567603413  | -0.12336099   | -0.038312786 | -0.085048204 | 0.999933887 | 0.232521711  | 0.250489722  | -0.01796801  | 0.961954468 |
| ENSG000000276533 | AC018926.2  | 1.964471041  | -0.035591835  | 0.275416761  | -0.311008596 | 0.999933887 | 0.292282608  | 0.0270578776 | -0.021703832 | 0.961997232 |
| ENSG000000162191 | UBXN1       | 6.771141406  | -0.009647783  | -0.017624598 | 0.007977175  |             |              |              |              |             |

|                  |            |              |              |              |              |              |              |              |              |             |
|------------------|------------|--------------|--------------|--------------|--------------|--------------|--------------|--------------|--------------|-------------|
| ENSG000000272562 | AL512343.2 | 0.773000584  | -0.117024487 | -0.215723854 | 0.098699367  | 0.999933887  | -0.653537114 | -0.63350419  | -0.020032923 | 0.964770221 |
| ENSG000000183808 | RBM12B     | 3.067484195  | 0.040692936  | -0.068444655 | 0.109137591  | 0.999933887  | -0.500950477 | -0.512184541 | 0.011234064  | 0.964770221 |
| ENSG000000134283 | PHLN1      | 4.217742243  | -0.119873104 | 0.036402781  | -0.156275885 | 0.944094537  | -0.15157709  | -0.144363329 | -0.007213761 | 0.964847853 |
| ENSG000000279636 | LINC00216  | -0.075796821 | -0.15353676  | 0.04666175   | -0.20019851  | 0.999933887  | 0.121020481  | 0.145581664  | -0.024561183 | 0.964847853 |
| ENSG000000258752 | AL357093.2 | -0.304060205 | -0.160537598 | 0.087454145  | -0.247991743 | 0.999933887  | -0.226242943 | -0.263494794 | 0.03725185   | 0.964847853 |
| ENSG000000013561 | RNF14      | 3.31359276   | -0.154294906 | -0.062588009 | -0.091706897 | 0.999933887  | -0.358474024 | -0.349612006 | -0.008662018 | 0.965134194 |
| ENSG000000107593 | PKD2L1     | -1.257776759 | -0.079431884 | 0.038944409  | -0.113326293 | 0.999933887  | -1.229586508 | -1.254487244 | 0.024900736  | 0.965351086 |
| ENSG000000233184 | AC093157.1 | 0.682554962  | 0.05627417   | 0.064494927  | -0.0383751   | 0.999933887  | 0.057474308  | 0.074285848  | -0.016811554 | 0.965516149 |
| ENSG000000105879 | CBLL1      | 4.357441199  | -0.073152297 | -0.150584552 | 0.077432255  | 0.999933887  | -0.22373782  | -0.231815541 | 0.008077721  | 0.965697648 |
| ENSG000000183943 | PRKX       | 4.365678167  | -0.068510671 | -0.043228097 | 0.025825274  | 0.999933887  | -0.02050428  | -0.027967504 | -0.007462765 | 0.965743117 |
| ENSG000000101935 | AMMECR1    | 2.12079829   | 0.100693498  | -0.051343114 | 0.152036612  | 0.999933887  | -0.123272249 | -0.10866536  | -0.01460689  | 0.965743117 |
| ENSG000000160216 | AGPAT3     | 4.200164585  | -0.049598465 | 0.037369244  | -0.086967708 | 0.999933887  | 0.09210441   | 0.084936253  | 0.007168157  | 0.965743117 |
| ENSG000000134184 | GSTM1      | -0.225835836 | 0.176007237  | 0.260255739  | -0.084248502 | 0.999933887  | -0.205438088 | -0.238932739 | 0.033494651  | 0.965743117 |
| ENSG000000163517 | HDAC11     | -0.012433032 | 0.098735323  | -0.211466603 | 0.310201926  | 0.999933887  | 0.02481427   | 0.001402483  | 0.023411787  | 0.965743117 |
| ENSG000000112996 | MRPS30     | 2.273284462  | -0.034037925 | 0.127717251  | -0.161755176 | 0.999933887  | 0.097084943  | 0.084304124  | 0.012780819  | 0.965743117 |
| ENSG000000204261 | PSMB8-AS1  | 4.696211644  | -0.005428354 | 0.054993335  | -0.06042169  | 0.999933887  | 0.054008086  | 0.046946304  | 0.007061782  | 0.965743117 |
| ENSG000000160124 | CCDC58     | -0.23385011  | 0.343256269  | -0.132765721 | 0.47602199   | 0.999933887  | 0.232025575  | 0.254496102  | -0.022470527 | 0.965942255 |
| ENSG000000172006 | ZNF54      | 2.843619427  | -0.099133487 | -0.18189322  | 0.082759733  | 0.999933887  | 0.262111631  | -0.010558137 | 0.006047241  | 0.966047241 |
| ENSG000000144381 | HSPD1      | 4.60758584   | -0.048393592 | -0.084070135 | 0.035676543  | 0.999933887  | 0.109055988  | 0.11715162   | -0.008095632 | 0.966078841 |
| ENSG000000204406 | MBD5       | 3.756113553  | 0.051125716  | 0.005303155  | 0.045822561  | 0.999933887  | -0.12224238  | -0.110546967 | -0.011695413 | 0.966078841 |
| ENSG000000283526 | PRTT1B     | 0.139148984  | 0.04171354   | -0.051181439 | 0.092894979  | 0.999933887  | 0.243641085  | 0.223024462  | 0.020616623  | 0.966078841 |
| ENSG000000078043 | PIAS2      | 1.957030362  | -0.025516972 | 0.008421154  | -0.03938126  | 0.999933887  | -0.244362837 | -0.263723772 | 0.019360935  | 0.966078841 |
| ENSG000000115266 | APC2       | 2.53206734   | 0.015613046  | 0.040048341  | -0.024435295 | 0.999933887  | -0.05578476  | -0.067641998 | 0.011857238  | 0.966078841 |
| ENSG000000242861 | AL591895.1 | 0.997880809  | -0.000119292 | -0.07284929  | 0.072729998  | 0.999933887  | -0.132442105 | -0.149913504 | 0.0174714    | 0.966078841 |
| ENSG000000100997 | ABHD12     | 2.697159955  | -0.075323168 | 0.043328831  | -0.118651999 | 0.999933887  | -0.037000577 | -0.02775096  | -0.009249618 | 0.966321161 |
| ENSG000000257815 | PRANCR     | 1.720496384  | -0.077757548 | 0.079861472  | -0.15743902  | 0.999933887  | 0.407262636  | 0.420540357  | -0.013277721 | 0.966322082 |
| ENSG000000270379 | HEATR9     | -0.240939914 | 0.269049763  | 0.156039013  | 0.114010749  | 0.999933887  | -0.205762929 | -0.233035066 | 0.027272137  | 0.966350516 |
| ENSG000000196715 | VKORC1L1   | 1.607792941  | 0.154375657  | 0.142087826  | 0.012288033  | 0.999933887  | -0.224015046 | -0.238750892 | 0.014735796  | 0.966541944 |
| ENSG000000198417 | MTIF       | -0.120689577 | -0.221128759 | -0.260438925 | 0.39220167   | 0.999933887  | 0.514366706  | 0.487232974  | 0.027133734  | 0.966541944 |
| ENSG000000205302 | SNX2       | 5.044252195  | -0.090449342 | -0.145763979 | 0.055314637  | 0.999933887  | -0.755466924 | -0.764792603 | 0.009325679  | 0.966541944 |
| ENSG000000249700 | SRD5A3-AS1 | -0.412068242 | 0.048891267  | 0.056984264  | -0.008092996 | 0.999933887  | 0.1077978013 | 0.1107229149 | -0.029251136 | 0.966541944 |
| ENSG000000122224 | LY9        | 4.067556943  | -0.008721114 | 0.042146912  | -0.050686026 | 0.999933887  | -0.007682681 | -0.010569671 | -0.007886991 | 0.966541944 |
| ENSG000000225484 | NUTM2B-AS1 | 3.447566873  | -0.006027468 | 0.025772121  | -0.031795699 | 0.999933887  | -0.34445025  | -0.352891142 | 0.009446117  | 0.966541944 |
| ENSG000000277113 | SLC25A43   | -0.292318357 | 0.000159284  | 0.33357823   | -0.333418946 | 0.999933887  | 0.168101839  | 0.143599831  | 0.024502008  | 0.966541944 |
| ENSG000000257135 | ODC1-DT    | -0.888073659 | -0.057369135 | 0.265167474  | -0.322536609 | 0.999933887  | 0.098101478  | 0.125526627  | -0.029425148 | 0.966553564 |
| ENSG000000146285 | SCML4      | 3.997585514  | 0.005941491  | -0.055544588 | 0.061486079  | 0.999933887  | -0.041216045 | -0.03386979  | -0.007346255 | 0.96672663  |
| ENSG000000205037 | AC134312.1 | -0.769919116 | -0.187151265 | 0.040603107  | -0.233212302 | 0.999933887  | 0.722013314  | 0.753253997  | -0.013240684 | 0.966927224 |
| ENSG000000145246 | ATP10D     | 2.013313806  | 0.092556081  | -0.13456733  | 0.227152619  | 0.999933887  | -0.389027891 | -0.376717679 | -0.012310213 | 0.967269743 |
| ENSG000000227417 | AC114402.1 | 0.366375784  | 0.06881378   | -0.17444453  | 0.461325908  | 0.999933887  | 0.429304912  | 0.457465739  | -0.028160827 | 0.967514937 |
| ENSG000000136152 | COG3       | 4.1677192    | -0.056749059 | -0.087822504 | 0.031078445  | 0.999933887  | -0.143730382 | -0.150481922 | 0.00675154   | 0.96793434  |
| ENSG000000154928 | EPHB1      | 6.612362902  | 0.033809524  | 0.043178379  | -0.009368855 | 0.999933887  | 0.142209914  | 0.150735026  | -0.008525112 | 0.96793434  |
| ENSG000000117419 | ER13       | 1.502312022  | 0.20904169   | 0.042932433  | 0.166109257  | 0.999933887  | 0.075306518  | 0.091527789  | -0.016221271 | 0.968062896 |
| ENSG000000162639 | HENMT1     | 1.897464263  | -0.082698997 | -0.186612907 | 0.10391391   | 0.999933887  | -0.214271028 | -0.200845443 | -0.013425585 | 0.968075892 |
| ENSG000000235162 | C12orf75   | 2.463553672  | 0.161725448  | -0.02938422  | 0.191109668  | 0.999933887  | -0.003910882 | 0.006643176  | -0.010554058 | 0.968092273 |
| ENSG000000188283 | ZNF383     | 1.143966745  | -0.15202493  | 0.170423241  | -0.322448171 | 0.999933887  | 0.147694935  | 0.132226917  | 0.015468018  | 0.968092273 |
| ENSG000000110090 | CPT1A      | 3.592004432  | -0.035787735 | -0.036243756 | 0.000456021  | 0.999933887  | -0.101934675 | -0.111884044 | 0.009949369  | 0.968092273 |
| ENSG000000257802 | MRS2P2     | 1.780121415  | -0.041658489 | 0.197576938  | -0.239235428 | 0.999933887  | 0.554591881  | 0.575282266  | -0.020690385 | 0.968092273 |
| ENSG000000230393 | LINC00892  | -0.74819547  | -0.028829296 | -0.158446761 | 0.129617465  | 0.999933887  | 0.050437023  | 0.028374249  | -0.068092273 | 0.968092273 |
| ENSG000000176994 | SMCR8      | 8.335497397  | -0.052608159 | -0.037704518 | -0.014903641 | 0.999933887  | 0.034525831  | 0.028033498  | 0.006492333  | 0.968209863 |
| ENSG000000279059 | AC007485.2 | -1.319506115 | -0.386120216 | 0.757196634  | -1.143316849 | 0.969206975  | 0.096751388  | 0.064225495  | 0.032525893  | 0.968210213 |
| ENSG000000100129 | E1F3L      | 4.829554108  | -0.013897182 | -0.119307227 | 0.105410045  | 0.999933887  | -0.07773455  | -0.007736996 | 0.068210213  | 0.968210213 |
| ENSG000000136868 | RAP1GDS1   | 2.01963295   | -0.097374281 | -0.011381283 | -0.085929998 | 0.999933887  | -0.097463883 | -0.08674827  | -0.010775613 | 0.968221968 |
| ENSG000000228203 | GRASLND    | 0.436408486  | -0.047965923 | 0.339713163  | -0.387679086 | 0.9992911887 | -0.049332841 | -0.022611798 | 0.968221968  | 0.968221968 |
| ENSG000000138375 | SMARCA1    | 1.739508512  | 0.032863788  | -0.02904273  | 0.061906518  | 0.999933887  | 0.057292595  | 0.043750442  | 0.013542152  | 0.968221968 |
| ENSG000000147065 | MSN        | 9.969724263  | -0.004549061 | -0.032822228 | 0.028273167  | 0.999933887  | 0.083656631  | 0.077143163  | 0.006513467  | 0.968221968 |
| ENSG000000147874 | HAUS6      | 2.333057906  | 0.004409468  | -0.063688453 | 0.068077921  | 0.999933887  | -0.309100161 | -0.291773268 | -0.017326894 | 0.968221968 |
| ENSG000000271151 | AC016737.1 | 0.856077855  | -0.233691502 | -0.303152495 | 0.069460984  | 0.999933887  | -1.084971791 | -1.068791409 | -0.016180382 | 0.968222678 |
| ENSG000000158941 | CCAR2      | 5.735935474  | 0.049211651  | 0.08432698   | -0.035115329 | 0.999933887  | -0.053743881 | -0.04688859  | -0.00585529  | 0.968313463 |
| ENSG000000173113 | TMT112     | 6.301729208  | 0.06899047   | -0.006561065 | 0.075551535  | 0.999933887  | 0.209970403  | 0.202106611  | 0.007863793  | 0.968313463 |
| ENSG000000143543 | JRBT       | 2.026688359  | -0.106773987 | -0.05291628  | -0.053857708 | 0.999933887  | -0.14345676  | -0.012576345 | 0.012577669  | 0.968313463 |
| ENSG000000113460 | BRIX1      | 1.451747474  | -0.087428979 | -0.031581588 | -0.055847391 | 0.999933887  | 0.070923533  | 0.056559669  | 0.014363863  | 0.968313463 |
| ENSG000000249738 | AC008691.1 | 0.266247594  | -0.232988927 | 0.080331181  | -0.313320108 | 0.999933887  | 0.149629688  | 0.134518763  | 0.015110925  | 0.968313463 |
| ENSG000000111843 | TMEM14C    | 2.528940121  | 0.075273442  | -0.003795824 | 0.083231266  | 0.999933887  | 0.075315489  | 0.090080785  | -0.014765296 | 0.968313463 |
| ENSG000000099219 | ERMP1      | 2.307941871  | 0.069945235  | -0.088954541 | 0.158899776  | 0.999933887  | 0.001559422  | -0.014067721 | -0.012508299 | 0.968313463 |
| ENSG000000259291 | ZNF710-AS1 | 2.950013769  | -0.066708211 | -0.097770429 | 0.309966118  | 0.999933887  | 0.136054573  | 0.146131997  | -0.010077423 | 0.968313463 |
| ENSG000000113721 | PDGFRB     | -0.529834226 | -0.095726628 | 0.123866366  | -0.309592994 | 0.999933887  | 0.153074613  | 0.177225493  | -0.02415088  | 0.968313463 |
| ENSG000000146433 | TMEM181    | 4.118662581  | 0.00647529   | -0.0080783   | 0.041725829  | 0.999933887  | -0.24138412  | -0.008634165 | 0.968313463  | 0.968313463 |
| ENSG000000129925 | PGAP6      | 7.058172677  | 0.084887333  | 0.06883023   | 0.016057104  | 0.999933887  | 0.430259848  | 0.421405132  | 0.008854716  | 0.968317659 |
| ENSG000000183506 | PIKAP2     | 2.74557814   | 0.068630983  | 0.098384864  | -0.029753881 | 0.999933887  | 0.139814194  | 0.150112993  | -0.010298799 | 0.968372334 |
| ENSG000000204767 | INAVN2B    | 2.847681378  | 0.05231942   | 0.402259588  | -0.350276468 | 0.999933887  | -0.062195118 | -0.07695989  | 0.014764772  | 0.968372334 |

|                   |             |              |              |              |              |             |              |               |              |             |
|-------------------|-------------|--------------|--------------|--------------|--------------|-------------|--------------|---------------|--------------|-------------|
| ENSG00000138604   | GLCE        | -0.578793283 | -0.072768134 | 0.16333779   | -0.236105924 | 0.999933887 | -0.056176422 | -0.083441938  | 0.027265516  | 0.970383583 |
| ENSG00000046688   | TDP1        | 2.5326343231 | 0.016716811  | -0.063529217 | 0.080246029  | 0.999933887 | 0.106917391  | 0.097542932   | 0.009374459  | 0.970383583 |
| ENSG00000012061   | ALKB3       | 0.898682666  | 0.014852469  | -0.054435168 | 0.069287637  | 0.999933887 | -0.019723225 | 0.023277506   | 0.012654281  | 0.970383583 |
| ENSG000000213025  | COX20P1     | -1.201898549 | 0.10224449   | 0.124806565  | -0.022562075 | 0.999933887 | -0.270867417 | -0.245582844  | -0.025284573 | 0.970508184 |
| ENSG00000178685   | PARP10      | 5.593745939  | 0.081724285  | -0.117080396 | -0.035356111 | 0.999933887 | 0.125427381  | 0.136129614   | -0.010702234 | 0.97092375  |
| ENSG00000180263   | FGD6        | -0.305288581 | -0.149231348 | -0.199967486 | 0.050736138  | 0.999933887 | 0.018665111  | -0.007729684  | 0.026394795  | 0.97092375  |
| ENSG00000132842   | AP3B1       | 4.770120502  | -0.006410162 | -0.082798095 | 0.076387933  | 0.999933887 | -0.205256133 | -0.196679703  | -0.00857643  | 0.971109544 |
| ENSG000000225880  | LINC00115   | 2.290680225  | 0.028146791  | 0.024188581  | 0.00395821   | 0.999933887 | 0.424344459  | 0.413037432   | 0.011397027  | 0.971120024 |
| ENSG00000065717   | TLE2        | 0.511090472  | -0.073867818 | 0.050489497  | -0.133357315 | 0.999933887 | 0.038843836  | 0.055741664   | -0.016897828 | 0.97112903  |
| ENSG00000183134   | PTGDR2      | 3.151636041  | -0.003842114 | 0.005356671  | -0.009198788 | 0.999933887 | -0.09075333  | -0.081598008  | 0.009157321  | 0.971136789 |
| ENSG00000163013   | FBXO41      | 2.607017506  | 0.021479167  | 0.148737714  | -0.127258547 | 0.999933887 | -0.000675852 | 0.008758982   | -0.009434834 | 0.97122061  |
| ENSG00000085760   | MTIF2       | 1.791500679  | -0.12267893  | -0.064096002 | -0.058582928 | 0.999933887 | -0.107113019 | -0.119380368  | 0.012267349  | 0.971460831 |
| ENSG000000204922  | UQC3        | 0.392677593  | 0.097990806  | 0.266000797  | -0.168009991 | 0.999933887 | 0.670757285  | 0.688494493   | -0.017737208 | 0.971460831 |
| ENSG00000156795   | NTAQ1       | -0.423984258 | 0.110328277  | -0.280917993 | 0.391246269  | 0.999933887 | -0.182608742 | -0.159542999  | -0.023065744 | 0.971460831 |
| ENSG00000175324   | LSM1        | 1.832718391  | -0.007845236 | -0.05054668  | 0.042701444  | 0.999933887 | -0.524901117 | -0.511800305  | -0.013100813 | 0.971460831 |
| ENSG00000136247   | ZDHH4       | 1.225591436  | -0.026474005 | 0.1163305    | -0.142804505 | 0.999933887 | -0.02188491  | -0.010710269  | -0.011174641 | 0.971498955 |
| ENSG00000145107   | TMSF19      | 0.150358587  | -0.101846666 | 0.133226198  | -0.235072864 | 0.999933887 | 0.121323753  | 0.132892325   | -0.011568572 | 0.971525839 |
| ENSG000000197586  | ENTPD6      | 3.113521476  | -0.069523201 | -0.109075403 | -0.178598604 | 0.999933887 | 0.077867936  | 0.069009137   | 0.008585799  | 0.971850725 |
| ENSG000000169740  | ZNF32       | 0.397474616  | -0.071958919 | -0.026240269 | -0.04571865  | 0.999933887 | 0.198334787  | 0.17769311    | 0.020641677  | 0.971977962 |
| ENSG000000198252  | STYX        | 3.141343567  | 0.094711619  | -0.058944813 | 0.153656432  | 0.999933887 | -0.406798507 | -0.395888773  | -0.010909734 | 0.971978561 |
| ENSG000000188723  | SMIM15      | 2.191183082  | -0.029990471 | -0.03031807  | 0.000327653  | 0.999933887 | -0.386022773 | -0.397219412  | 0.011196639  | 0.971978561 |
| ENSG000000105793  | GTPBP1      | 1.820876562  | -0.085998781 | -0.005038672 | -0.080960109 | 0.999933887 | -0.21224128  | -0.197571085  | 0.014670196  | 0.972144767 |
| ENSG000000276529  | AP001505.1  | -1.060038098 | 0.112937095  | 0.167897199  | -0.054960103 | 0.999933887 | -0.092745097 | -0.055336451  | -0.037408646 | 0.972144767 |
| ENSG000000158604  | TMED4       | 5.445527338  | 0.01077224   | 0.07635774   | -0.0655855   | 0.999933887 | 0.343693738  | 0.338394694   | 0.005299044  | 0.972260539 |
| ENSG000000104970  | KIR3DX1     | -0.462329571 | 0.005586069  | -0.129056158 | -0.134642227 | 0.999933887 | -0.135504764 | -0.113195099  | -0.022309665 | 0.972260539 |
| ENSG000000173272  | MZT2A       | 2.665925345  | -0.113586681 | -0.053635883 | 0.167492744  | 0.999933887 | -0.006737555 | -0.018602288  | 0.011864733  | 0.972846482 |
| ENSG000000100027  | YPEL1       | 1.236229904  | 0.089770844  | -0.243330315 | 0.333101158  | 0.999933887 | -0.139166169 | -0.152902701  | 0.013736532  | 0.972846482 |
| ENSG000000185730  | ZNF696      | 0.577369995  | 0.078170371  | 0.190599996  | -0.112429625 | 0.999933887 | 0.124602158  | 0.137528135   | -0.012925977 | 0.972935738 |
| ENSG000000221995  | TIAF1       | 0.584368255  | 0.007751401  | 0.049681203  | -0.014939802 | 0.999933887 | -0.42608563  | -0.0847657016 | -0.018428613 | 0.97301829  |
| ENSG00000184465   | WDR27       | 1.398828014  | 0.014038538  | 0.025025359  | -0.010986821 | 0.999933887 | 0.061950671  | 0.049844088   | 0.012106583  | 0.973378996 |
| ENSG000000198130  | HIBCH       | 0.666780015  | 0.258705323  | 0.071007948  | 0.187697376  | 0.999933887 | -0.183257999 | -0.160096275  | -0.023161274 | 0.973608957 |
| ENSG000000215030  | RPL13P12    | 3.1903202897 | 0.08741248   | -0.005546509 | 0.092958989  | 0.999933887 | 0.038467335  | 0.047603025   | -0.009135699 | 0.973608957 |
| ENSG000000270647  | TAIF15      | 5.116749725  | 0.058244619  | -0.091195851 | -0.032950962 | 0.999933887 | -0.030435312 | -0.038372137  | 0.007396825  | 0.973608957 |
| ENSG000000179271  | GADD45GIP1  | 1.979237775  | 0.070369486  | 0.00214104   | 0.068228446  | 0.999933887 | 0.201606363  | 0.201396507   | -0.010330144 | 0.973608957 |
| ENSG000000163636  | PSMD6       | 5.118361858  | -0.031495636 | -0.074277824 | 0.042782188  | 0.999933887 | -0.202007318 | -0.196957527  | -0.005049791 | 0.973608957 |
| ENSG000000112139  | MDGA1       | 0.184509993  | -0.078599968 | 0.02967351   | -0.108273477 | 0.999933887 | -0.201948376 | -0.189332602  | -0.012615774 | 0.973608957 |
| ENSG000000255882  | AC091814.1  | 0.15252843   | 0.074238629  | 0.527370348  | -0.453131719 | 0.999933887 | -0.164113732 | -0.193866164  | 0.029572432  | 0.973608957 |
| ENSG000000165886  | UBTD1       | 3.638252527  | 0.03033206   | 0.011663445  | 0.018668615  | 0.999933887 | -0.807872051 | -0.797007866  | -0.010864185 | 0.973608957 |
| ENSG000000143621  | ILF2        | 4.381943237  | -0.046365088 | -0.038111798 | -0.008253291 | 0.999933887 | 0.224354753  | -0.006073159  | -0.067680175 | 0.973608957 |
| ENSG000000163600  | ICOS        | 3.773844719  | -0.031440419 | -0.058742019 | 0.0273016    | 0.999933887 | 0.058267838  | 0.064882397   | -0.006614559 | 0.973969677 |
| ENSG000000167632  | TRAPPC9     | 3.898255885  | 0.0387579    | -0.115744668 | 0.154502589  | 0.999933887 | 0.077779637  | 0.070213107   | 0.00756653   | 0.974318908 |
| ENSG000000262999  | AC099489.3  | 1.638530691  | 0.252841249  | 0.010164204  | 0.242677046  | 0.999933887 | 0.636365595  | 0.650586845   | -0.01422125  | 0.97432441  |
| ENSG000000100403  | ZC3H7B      | 3.970354729  | 0.012767903  | 0.083154924  | -0.070387021 | 0.999933887 | 0.150180875  | 0.15663677    | -0.006455892 | 0.97432441  |
| ENSG000000261024  | GS1-279B7.1 | 1.81868876   | 0.071621283  | 0.0289917    | 0.042629582  | 0.999933887 | 0.574461093  | 0.559843447   | 0.014617646  | 0.974353152 |
| ENSG000000165733  | BMS1        | 2.721968895  | -0.067083818 | -0.049035495 | -0.018768323 | 0.999933887 | 0.177666645  | -0.185298646  | -0.007632001 | 0.97472717  |
| ENSG000000240767  | RN7SL28BP   | 1.113922299  | 0.358400446  | 0.541476835  | -0.183076389 | 0.999933887 | 0.894058777  | 0.866341189   | 0.027424588  | 0.974914546 |
| ENSG000000123136  | DDX39A      | 7.46203267   | 0.082723652  | 0.042025253  | 0.06498398   | 0.999933887 | 0.19204011   | 0.197384898   | -0.005344788 | 0.974914546 |
| ENSG000000128595  | CALU        | 3.262373862  | -0.052454211 | -0.044074874 | -0.008379337 | 0.999933887 | -0.178545755 | -0.184269142  | 0.005723387  | 0.974914546 |
| ENSG00000119912   | IDE         | 1.915874387  | -0.06157227  | -0.24150296  | 0.179930689  | 0.999933887 | -0.147164443 | -0.157843597  | 0.010679154  | 0.974914546 |
| ENSG000000139644  | TMBIM6      | 8.994553053  | -0.023914027 | -0.022047253 | -0.001866774 | 0.999933887 | -0.041170016 | -0.045887756  | 0.00471774   | 0.974914546 |
| ENSG000000168116  | KIAA1586    | 0.004655592  | -0.006705708 | -0.19532887  | 0.188623279  | 0.999933887 | 0.005243621  | -0.012922211  | 0.018165832  | 0.974914546 |
| ENSG000000131797  | CLUHP3      | 3.367513619  | 0.015000991  | 0.024262874  | -0.009261883 | 0.999933887 | 0.262792283  | 0.270871728   | -0.008079445 | 0.975034632 |
| ENSG000000105708  | ZNF14       | 1.857900185  | 0.054620878  | -0.1984676   | 0.253088478  | 0.999933887 | -0.225882815 | -0.239055329  | 0.013172514  | 0.975178233 |
| ENSG000000058056  | USP13       | 0.414930958  | 0.032278324  | -0.002131072 | 0.034409395  | 0.999933887 | -0.040609165 | -0.055280214  | 0.014671049  | 0.975263763 |
| ENSG000000184574  | LPAR5       | 0.238668569  | 0.030253546  | -0.145343272 | 0.175866818  | 0.999933887 | 0.018906208  | 0.013095522   | -0.012189314 | 0.975263763 |
| ENSG000000164465  | DCBLD1      | 0.195919022  | -0.002549491 | 0.309170415  | -0.331625356 | 0.999933887 | 0.127785399  | 0.11361169    | 0.014224231  | 0.975279865 |
| ENSG000000171295  | ZNF440      | 1.599537807  | -0.12522947  | -0.100829011 | -0.022693936 | 0.999933887 | -0.295894113 | -0.282119887  | -0.013774216 | 0.975302949 |
| ENSG000000118200  | CAMSAP2     | 0.322600782  | 0.092293793  | -0.063329839 | 0.155686632  | 0.999933887 | -0.437735675 | 0.017742011   | 0.075302949  | 0.975302949 |
| ENSG000000142173  | COL6A2      | 3.507680121  | 0.034674663  | 0.111414581  | -0.076739917 | 0.999933887 | 0.095077985  | 0.10328572    | -0.008207735 | 0.975364214 |
| ENSG000000135093  | USP30       | 2.873800375  | 0.003546777  | -0.07068376  | 0.074092437  | 0.999933887 | -0.154374243 | -0.06992207   | 0.075656167  | 0.975656167 |
| ENSG000000141026  | MED9        | 1.91431254   | -0.011291275 | -0.049972733 | 0.038681459  | 0.999933887 | -0.075752321 | -0.06807317   | -0.007679151 | 0.975856612 |
| ENSG000000169762  | TAPT1       | 3.756030853  | -0.071440766 | -0.0030689   | -0.068373866 | 0.999933887 | -0.129391901 | -0.122569217  | -0.006822684 | 0.975856365 |
| ENSG000000133477  | FAM83F      | -0.791174026 | 0.118902901  | 0.057281528  | 0.061621372  | 0.999933887 | 0.169332205  | 0.149645672   | 0.019686533  | 0.975905973 |
| ENSG000000100650  | SRSF5       | 9.207348785  | 0.020096918  | -0.006521728 | 0.026618646  | 0.999933887 | 0.281693619  | 0.286190874   | -0.004497255 | 0.975905973 |
| ENSG0000002034608 | MAPKAPK5-A  | 2.173769809  | -0.093968406 | 0.036532743  | -0.130501148 | 0.999933887 | -0.027830221 | -0.019209103  | 0.008801118  | 0.976106094 |
| ENSG000000168872  | DDX19A      | 2.389920198  | 0.05525182   | -0.003062688 | 0.058334507  | 0.999933887 | 0.246441099  | 0.238007778   | 0.008433322  | 0.976106094 |
| ENSG000000204435  | CNNK2B      | 3.190239571  | -0.048548186 | 0.021520097  | -0.070068283 | 0.999933887 | -0.176928612 | -0.170039336  | -0.006899276 | 0.976106094 |
| ENSG000000167972  | ABCA3       | 1.059140267  | 0.08089944   | -0.013713377 | 0.094612817  | 0.999933887 | -0.001741536 | 0.010696312   | -0.012437848 | 0.976106094 |
| ENSG000000231999  | LRRRC8-DT   | 1.09710363   | -0.14103499  | -0.086626673 | -0.054408317 | 0.999933887 | 0.119967557  | 0.131719077   | -0.011751521 | 0.976188612 |
| ENSG000000180787  | ZFP3        | 0.142855756  | -0.017934102 | 0.045210854  | -0.063144956 | 0.999933887 | 0.0233554    | 0.010158824   | 0.976245386  | 0.976245386 |
| ENSG000000130684  | ZNF337      | -0.485353367 | 0.08871      |              |              |             |              |               |              |             |

|                  |            |              |              |               |              |             |              |              |              |             |
|------------------|------------|--------------|--------------|---------------|--------------|-------------|--------------|--------------|--------------|-------------|
| ENSG00000189136  | UBE2Q2P1   | -0.175829484 | -0.309805796 | -0.191379139  | -0.118426657 | 0.999933887 | -0.045539907 | -0.064320999 | 0.018781093  | 0.977176563 |
| ENSG000000271533 | Z83B43.1   | 1.517016247  | 0.124563342  | 0.174898704   | -0.050335362 | 0.999933887 | -0.324995755 | -0.311357072 | -0.013638683 | 0.977176563 |
| ENSG00000156469  | MTERF3     | 0.504208864  | -0.075999405 | -0.096768014  | 0.020768609  | 0.999933887 | 0.111271111  | 0.097508428  | 0.013762683  | 0.977176563 |
| ENSG00000101639  | CEP192     | 3.75550698   | 0.024339156  | -0.079177453  | 0.103516609  | 0.999933887 | -0.176617455 | -0.187707738 | 0.011090282  | 0.977176563 |
| ENSG00000128394  | APOBEC3F   | 2.117438079  | -0.013453548 | 0.084882417   | -0.098355965 | 0.999933887 | -0.208476309 | -0.199286187 | -0.009190122 | 0.978037701 |
| ENSG00000279179  | AL662907.2 | 0.779434137  | 0.146925917  | -0.115320022  | 0.26222614   | 0.999933887 | -0.323878687 | -0.339192752 | 0.015314065  | 0.978139158 |
| ENSG00000120696  | KBTBD7     | 3.450779575  | 0.084460227  | -0.008298007  | 0.092758234  | 0.999933887 | 0.689022899  | 0.67854069   | 0.011361599  | 0.978267821 |
| ENSG00000271991  | AC013400.1 | 1.144489174  | 0.502919112  | 0.026981223   | 0.43993789   | 0.999933887 | 2.669967646  | 2.642736954  | 0.027236092  | 0.978360383 |
| ENSG00000141642  | ELAC1      | -0.652282525 | -0.018336191 | 0.047720206   | -0.066056396 | 0.999933887 | 0.075573366  | 0.093677912  | -0.018104546 | 0.978360383 |
| ENSG00000147010  | SH3KBP1    | 7.314829835  | 8.876e-06    | 0.003878357   | -0.003869481 | 0.999933887 | 0.078912056  | 0.00358156   | 0.978360383  |             |
| ENSG00000206530  | CFAP44     | 0.425463622  | -0.189642306 | -0.234537219  | 0.044894913  | 0.999933887 | -0.066734726 | -0.051360019 | -0.015374708 | 0.978877031 |
| ENSG00000152082  | MZT2B      | 1.898035625  | 0.122880675  | 0.001377237   | 0.121503438  | 0.999933887 | -0.026073563 | -0.015590044 | -0.01048352  | 0.978877031 |
| ENSG00000163191  | S100A11    | 9.598736224  | 0.055695687  | -0.018446466  | 0.074160333  | 0.999933887 | -0.578228059 | -0.573404963 | -0.004823096 | 0.978877031 |
| ENSG00000108679  | LGALS3BP   | 3.313292432  | 0.056801737  | 0.029002731   | 0.027799006  | 0.999933887 | -0.059901489 | -0.052680656 | -0.007220833 | 0.978877031 |
| ENSG00000175110  | MRPS22     | 2.191867716  | 0.049913093  | -0.112538314  | 0.162451408  | 0.999933887 | -0.006113079 | 0.001920424  | -0.008033508 | 0.978877031 |
| ENSG00000128881  | TTBK2      | 2.911412244  | 0.047444778  | -0.015111521  | 0.062556299  | 0.999933887 | -0.054584829 | -0.043692913 | -0.010891916 | 0.978877031 |
| ENSG00000127989  | MTERF1     | 1.419433977  | 0.052570926  | -0.254316979  | 0.306887905  | 0.999933887 | -0.276572985 | -0.287113709 | 0.010540724  | 0.978877031 |
| ENSG00000150787  | PTS        | 2.568847733  | -0.022852167 | 0.07640518    | -0.099256685 | 0.999933887 | 0.090491578  | 0.083048906  | 0.007484906  | 0.978877031 |
| ENSG00000196152  | ZNF79      | 1.815386125  | 0.033127547  | 0.068472559   | -0.035345013 | 0.999933887 | -0.104587546 | -0.112431973 | 0.007844429  | 0.978877031 |
| ENSG00000221829  | FANCG      | 1.330334755  | 0.104991786  | -0.027385604  | 0.077066182  | 0.999933887 | -0.010752718 | -0.000988985 | -0.009768345 | 0.978877031 |
| ENSG00000100359  | SGSM3      | -0.492826905 | -0.073423235 | -0.121211202  | 0.047788877  | 0.999933887 | -0.11200622  | -0.091834444 | -0.020172076 | 0.979120568 |
| ENSG00000213062  | Z99572.1   | -0.798723404 | 0.156557896  | 0.114465902   | 0.042091994  | 0.999933887 | 0.095561085  | 0.027175549  | -0.030416465 | 0.979149204 |
| ENSG00000225774  | SIRPAP1    | 0.843793216  | -0.06609707  | -0.0185298    | -0.047567269 | 0.999933887 | 0.6407808    | 0.62874713   | 0.01203367   | 0.979225723 |
| ENSG00000173457  | PPP1R14B   | 2.35712467   | 0.037572235  | -0.017203048  | 0.054775283  | 0.999933887 | -0.007627568 | -0.01434563  | 0.006718062  | 0.979251889 |
| ENSG00000141540  | TTYH2      | 2.111109312  | -0.025485847 | -0.045220068  | 0.019734221  | 0.999933887 | 0.125016823  | 0.134474768  | -0.009457945 | 0.979251889 |
| ENSG00000243566  | UPKB3B     | 0.809646145  | -0.125976193 | -0.127449451  | 0.001473258  | 0.999933887 | 0.198665502  | 0.211858642  | -0.01319314  | 0.979276155 |
| ENSG00000074855  | ANO8       | 2.058148278  | 0.083221584  | 0.186894492   | -0.105472908 | 0.999933887 | 0.065995475  | 0.056380801  | 0.09457395   | 0.979301974 |
| ENSG00000109416  | DHRSTB     | 2.567492346  | 0.063093898  | 0.075888412   | -0.012794514 | 0.999933887 | -0.053452237 | -0.059738555 | 0.006284319  | 0.97933366  |
| ENSG00000131408  | MGAT1      | 8.765014923  | -0.047309796 | -0.045740017  | -0.001569779 | 0.999933887 | -0.779423387 | -0.784691227 | 0.00526784   | 0.97933366  |
| ENSG00000129295  | LRR6       | 0.631780544  | -0.055003765 | -0.092559326  | 0.037555561  | 0.999933887 | -0.237775857 | -0.223218183 | -0.014557674 | 0.97933366  |
| ENSG00000163923  | RPL39L     | -0.567338558 | 0.127980172  | 0.034639651   | 0.093340521  | 0.999933887 | -0.278680233 | -0.291575072 | 0.012894839  | 0.97933366  |
| ENSG00000239839  | DEFA3      | 0.806215167  | 0.087425866  | 0.049324943   | 0.038100923  | 0.999933887 | 0.073640397  | 0.063499393  | 0.010141004  | 0.979422251 |
| ENSG00000167114  | SLC27A4    | 1.357335962  | 0.01688626   | 0.144852804   | -0.127966544 | 0.999933887 | 0.07037931   | 0.060963287  | 0.009416023  | 0.979517302 |
| ENSG000002085531 | FCGR1C     | 0.9904494212 | 0.028350779  | -0.093606425  | 0.121957205  | 0.999933887 | 0.046352183  | 0.030074709  | 0.016278085  | 0.979575715 |
| ENSG00000237424  | FOXO2-AS1  | -0.144366635 | 0.02572715   | 0.042730888   | -0.017003737 | 0.999933887 | 0.118192552  | 0.104298431  | 0.013894121  | 0.979785694 |
| ENSG00000178498  | DTX3       | 2.078667656  | -0.141555304 | 0.137061641   | -0.278616945 | 0.944094537 | -0.027888714 | -0.035313382 | 0.007424668  | 0.979822784 |
| ENSG00000135334  | AKIRIN2    | 8.956184283  | -0.012345094 | 0.008923029   | -0.021268122 | 0.999933887 | -0.664649601 | -0.004765725 | 0.979822784  |             |
| ENSG00000182902  | SLC25A18   | 0.489261269  | 0.183853216  | 0.136803569   | 0.047049646  | 0.999933887 | 0.667700129  | 0.67654185   | -0.008841721 | 0.97995012  |
| ENSG00000228634  | AL136115.1 | -0.162429463 | -0.157679532 | -0.000235251  | -0.157444282 | 0.999933887 | 0.164931738  | 0.152726951  | 0.017526951  | 0.97995012  |
| ENSG00000166181  | API5       | 3.762335566  | -0.096684283 | -0.066963233  | -0.02972105  | 0.999933887 | -0.084706105 | -0.089821238 | 0.005115133  | 0.980173136 |
| ENSG00000060982  | BCAT1      | 2.433962466  | -0.074826147 | 0.11031808    | -0.185144205 | 0.999933887 | -0.374746722 | -0.38175447  | 0.007007405  | 0.980200792 |
| ENSG00000204237  | OXL1D      | 2.851212124  | -0.030274787 | -0.043498161  | 0.013223374  | 0.999933887 | 0.285791358  | 0.291726837  | -0.005935479 | 0.980200792 |
| ENSG00000275437  | AL121832.3 | 1.770727233  | 0.036700468  | -0.048924186  | 0.085624654  | 0.999933887 | 0.760255731  | 0.771732378  | -0.011476468 | 0.980200792 |
| ENSG000002023171 | GRAMD1B    | 3.123303525  | -0.021227948 | 0.000815139   | -0.022043067 | 0.999933887 | 0.05032091   | 0.050630562  | -0.00606353  | 0.980252906 |
| ENSG000002083142 | AL049767.1 | -0.215926524 | -0.329832963 | -0.557241411  | 0.227408448  | 0.999933887 | -0.014373666 | -0.004829001 | -0.009544665 | 0.980328933 |
| ENSG00000287201  | AC009682.1 | 2.141018467  | 0.079184219  | 0.072120378   | 0.007080421  | 0.999933887 | 0.155142785  | 0.169275104  | -0.014132319 | 0.980698601 |
| ENSG00000105778  | AVL9       | 5.783808429  | -0.018211084 | -0.005513313  | -0.01269777  | 0.999933887 | -0.362718271 | -0.359049979 | -0.003668292 | 0.980698601 |
| ENSG00000154058  | IMPACT     | 1.38141634   | -0.022663137 | 0.168469991   | -0.172133128 | 0.999933887 | -0.280181705 | -0.270555066 | -0.009626659 | 0.980848513 |
| ENSG00000196922  | ZNF252P    | 1.385737065  | 0.050352506  | -0.149256216  | 0.199608722  | 0.999933887 | -0.129979971 | -0.115158938 | -0.014821033 | 0.980931071 |
| ENSG00000110218  | PANX1      | 1.187068567  | 0.012500563  | 0.011913755   | 0.000586988  | 0.999933887 | 0.087177542  | 0.076206035  | 0.010971507  | 0.981201389 |
| ENSG00000196511  | TPK1       | 1.685252078  | 0.041811018  | -0.083418527  | 0.152229545  | 0.999933887 | -0.011387297 | -0.021862436 | 0.010475139  | 0.981254414 |
| ENSG00000151208  | DLG5       | 1.741839224  | 0.005658597  | 0.076182024   | -0.070516067 | 0.999933887 | -1.9461e-05  | -0.00823319  | 0.008213728  | 0.981504445 |
| ENSG00000161016  | RPL8       | 8.323174273  | 0.026103889  | -0.011356818  | 0.037460706  | 0.999933887 | 0.083037384  | 0.087055907  | -0.004018523 | 0.981710334 |
| ENSG00000186582  | CENPV      | 0.548309793  | 0.083665418  | -0.000524189  | 0.084189608  | 0.999933887 | 0.106032305  | 0.095963499  | 0.010068811  | 0.981775554 |
| ENSG00000276471  | AC105265.3 | -0.122892896 | 0.070779632  | -0.013796044  | 0.143975677  | 0.999933887 | 1.807437625  | 1.828641994  | -0.021204573 | 0.981775554 |
| ENSG00000223509  | AC135983.2 | 1.021228045  | 0.051263876  | 0.063071166   | -0.01180729  | 0.999933887 | 0.083756274  | 0.073128347  | 0.010627927  | 0.981775554 |
| ENSG00000202633  | RUNX3      | 7.275027138  | 0.002793857  | 0.011749401   | -0.008955154 | 0.999933887 | 0.103375391  | 0.099584005  | 0.003416967  | 0.981775554 |
| ENSG00000168575  | SLC20A2    | 2.654175075  | 0.004529771  | 0.067188406   | -0.062659635 | 0.999933887 | 0.092770134  | 0.006836043  | 0.006695909  | 0.981775554 |
| ENSG00000166557  | TMED3      | 2.194715035  | 0.056191711  | -0.071745248  | 0.127936959  | 0.999933887 | 0.080012075  | 0.073479264  | 0.006532811  | 0.981836629 |
| ENSG00000151148  | UBE3B      | 4.764449403  | -0.016873598 | 0.032203343   | -0.049076941 | 0.999933887 | -0.011917748 | -0.003586198 | 0.982040754  |             |
| ENSG00000269893  | SNHG8      | 3.666552609  | 0.102538231  | 0.001522074   | 0.101016157  | 0.999933887 | 0.229102717  | 0.223639327  | 0.00546348   | 0.98204154  |
| ENSG00000100577  | GSTZ1      | 0.171799877  | -0.221392616 | 0.002548779   | -0.223941395 | 0.999933887 | -0.120349402 | -0.109660157 | -0.010488886 | 0.982156505 |
| ENSG00000188822  | CNR2       | 3.789836545  | -0.119682801 | -0.014367403  | -0.105315398 | 0.999933887 | -0.107911465 | -0.112815174 | 0.004903709  | 0.982156505 |
| ENSG00000090097  | PCBP4      | 1.829469979  | 0.106407239  | 0.130343275   | -0.023936036 | 0.999933887 | 0.114928497  | 0.122663652  | -0.007735155 | 0.982156505 |
| ENSG00000124614  | RPS10      | 0.256943918  | -0.106981623 | 0.061778057   | -0.16875968  | 0.999933887 | 0.108534991  | 0.12052448   | 0.012052448  | 0.982156505 |
| ENSG00000280853  | AC109460.2 | 2.689963375  | 0.035986914  | 0.050498615   | -0.014511701 | 0.999933887 | 0.055456227  | 0.061205464  | -0.005749237 | 0.982156505 |
| ENSG00000233369  | GTF2IP4    | 2.811052311  | -0.028206368 | 0.009824713   | -0.03803108  | 0.999933887 | -0.007116586 | -0.071673815 | 0.007167929  | 0.982156505 |
| ENSG00000006007  | FARP2      | 2.625901859  | 0.015493561  | -0.009732958  | 0.025226519  | 0.999933887 | -0.119450498 | -0.112944469 | -0.006506029 | 0.982156505 |
| ENSG00000111077  | TNS2       | 0.108286923  | -0.017641565 | 0.06313790639 | -0.331432204 | 0.999933887 | -0.012576677 | -0.027077266 | 0.014500589  | 0.982156505 |
| ENSG00000256361  | AC027544.1 | -0.373114561 | -0.068632019 | -0.108900004  | 0.040267986  | 0.999933887 | 0.217802748  | 0.194252461  | 0.023550287  | 0.982236846 |
| ENSG00000202056  | ZFP64      | 0.737566032  | 0.1583546    | 0.089390965   | 0.06896363   |             |              |              |              |             |

|                   |            |              |              |              |              |             |              |              |              |             |
|-------------------|------------|--------------|--------------|--------------|--------------|-------------|--------------|--------------|--------------|-------------|
| ENSG00000180071   | ANKRD18A   | -1.235076976 | 0.064901544  | 0.055915371  | 0.008986173  | 0.999933887 | 0.260865365  | 0.283878199  | -0.023012835 | 0.983041231 |
| ENSG000000253106  | AC090198.1 | 0.233109924  | -0.033577526 | -0.114345966 | 0.08076844   | 0.999933887 | -0.459263282 | -0.446041823 | -0.013221459 | 0.983041231 |
| ENSG000000119771  | KLHL29     | -0.041246538 | 0.029077699  | 0.134209952  | -0.105132253 | 0.999933887 | -0.171645414 | -0.023170011 | 0.011400547  | 0.983041231 |
| ENSG000000169612  | RAMAC      | 2.140382198  | -0.020295608 | 0.033389043  | -0.053684652 | 0.999933887 | 0.051417771  | 0.05725757   | -0.005839799 | 0.983041231 |
| ENSG0000000254197 | AC011676.3 | 1.9471143472 | 0.030025832  | 0.036783978  | -0.006758146 | 0.999933887 | -0.090080028 | -0.075267956 | -0.014812072 | 0.983041231 |
| ENSG000000113838  | TBCDD1     | 0.958724844  | 0.0246660978 | 0.249663638  | -0.225035339 | 0.999933887 | 0.0973228    | 0.106793331  | -0.009470531 | 0.983041231 |
| ENSG000000285499  | BX264668.2 | -2.47887011  | -0.081940347 | -0.106396394 | 0.024453287  | 0.999933887 | -0.004438779 | -0.021161907 | 0.016723128  | 0.983041231 |
| ENSG000000196914  | ARHGEF12   | 2.191385346  | -0.006615346 | -0.091330357 | 0.084715224  | 0.999933887 | -0.089112932 | -0.095498885 | 0.006385953  | 0.983041231 |
| ENSG000000106153  | CHCHD2     | 6.003665742  | 0.046903226  | 0.080407888  | -0.033504662 | 0.999933887 | 0.16477104   | 0.160778292  | 0.003992748  | 0.983347066 |
| ENSG000000075568  | TMEM131    | 5.223192585  | 0.01908745   | 0.002953218  | 0.016134233  | 0.999933887 | -0.236970936 | -0.241203059 | 0.004321213  | 0.983538626 |
| ENSG000000260314  | MRC1       | -1.066980994 | 0.262300442  | 0.248980527  | 0.013319916  | 0.999933887 | 0.312088756  | 0.286078649  | 0.026010107  | 0.983927875 |
| ENSG000000138777  | PPA2       | 3.253461911  | 0.031370963  | 0.075961626  | -0.044590663 | 0.999933887 | -0.090787248 | -0.086738797 | -0.004048452 | 0.983927875 |
| ENSG000000168172  | HOOK3      | 4.67218973   | -0.004157638 | -0.031809613 | 0.027651975  | 0.999933887 | -0.586467605 | -0.580293703 | -0.006173902 | 0.983927875 |
| ENSG000000150990  | DHX37      | 2.991729831  | 0.001108453  | 0.021285952  | -0.020177499 | 0.999933887 | 0.091732509  | 0.09624228   | -0.004509771 | 0.983927875 |
| ENSG000000198832  | SELENOM    | 1.486126454  | -0.104397088 | 0.046008346  | -0.150405434 | 0.999933887 | 0.335377639  | -0.343922162 | -0.008544524 | 0.984056082 |
| ENSG000000139343  | SNRPF      | 2.027144404  | -0.092329317 | -0.01698639  | -0.075342927 | 0.999933887 | 0.141105645  | 0.134171221  | 0.006934424  | 0.984167441 |
| ENSG000000122432  | SPATA1     | 0.653977088  | -0.025905157 | -0.094772807 | 0.06886765   | 0.999933887 | -0.334612239 | -0.344473222 | 0.009600982  | 0.984167441 |
| ENSG000000138107  | ACTR1A     | 5.748438069  | -0.007406848 | 0.028267564  | -0.035674413 | 0.999933887 | 0.032059847  | 0.035374096  | -0.003314249 | 0.984167441 |
| ENSG000000162437  | RAVER2     | 1.435872256  | 0.005285309  | -0.008957687 | 0.014242996  | 0.999933887 | 0.129997032  | 0.11899538   | 0.011097494  | 0.984167441 |
| ENSG000000004779  | NDUFAB1    | 1.862865572  | 0.004956496  | -0.154638594 | 0.15959509   | 0.999933887 | -0.001171181 | 0.005888694  | -0.007508975 | 0.984389942 |
| ENSG000000137074  | APTX       | 2.967074585  | 0.023412066  | -0.023252075 | 0.04664141   | 0.999933887 | 0.096195631  | 0.101522284  | -0.005326654 | 0.984405989 |
| ENSG000000117425  | PTCH2      | 0.127294248  | 0.165675274  | 0.060425746  | 0.105249528  | 0.999933887 | 0.485485532  | -0.010987116 | 0.019887116  | 0.984434003 |
| ENSG000000141349  | G6PC3      | 1.103264447  | -0.014760309 | -0.000793267 | -0.013967042 | 0.999933887 | -0.13134697  | -0.138536027 | 0.007189056  | 0.984434003 |
| ENSG000000075089  | ACTR6      | 1.786457792  | -0.06503258  | -0.131257358 | 0.066224478  | 0.999933887 | -0.037607507 | -0.043832137 | 0.006224631  | 0.984498268 |
| ENSG000000131791  | PRKAB2     | 2.489953122  | -0.064426181 | -0.113471181 | 0.049045629  | 0.999933887 | -0.012614877 | -0.007180088 | -0.005434793 | 0.984498268 |
| ENSG000000181773  | GPR3       | 0.565179719  | 0.160834836  | 0.129364337  | 0.031470499  | 0.999933887 | 1.875687324  | 1.896362838  | -0.020675515 | 0.984679316 |
| ENSG000000244723  | ASL1P1     | 0.155173684  | -0.056406535 | -0.010568112 | -0.045838422 | 0.999933887 | -0.12337742  | -0.135224948 | 0.011847528  | 0.984822951 |
| ENSG000000118961  | LDAH       | 0.522562638  | -0.099055422 | -0.001845942 | -0.097209479 | 0.999933887 | 0.079909176  | 0.0717117206 | 0.00819197   | 0.984829526 |
| ENSG000000135622  | SEMA4F     | 0.913949883  | -0.009782006 | -0.00269689  | -0.007085116 | 0.999933887 | 0.146861308  | 0.107786256  | 0.003776256  | 0.985242808 |
| ENSG000000180407  | DIABLO     | 2.089602559  | 0.115329109  | 0.162049293  | -0.046720184 | 0.999933887 | 0.319622592  | 0.31201732   | 0.007605273  | 0.985487863 |
| ENSG000000132382  | MYBBP1A    | 3.419829389  | 0.04942476   | 0.137285282  | -0.087860523 | 0.999933887 | 0.232140538  | 0.235752117  | -0.003611579 | 0.985487863 |
| ENSG000000156374  | PCGF6      | -0.147047848 | 0.14408165   | 0.148196274  | -0.004114624 | 0.999933887 | 0.027326739  | 0.038617695  | -0.011290956 | 0.985487863 |
| ENSG000000100462  | PRMT5      | 1.685022996  | -0.048509342 | 0.006706972  | -0.055216314 | 0.999933887 | 0.120000322  | 0.1121804    | 0.007819922  | 0.985487863 |
| ENSG000000138382  | METTL5     | 0.865261504  | 0.051418368  | 0.037328985  | 0.358747353  | 0.999933887 | 0.116111895  | 0.072688127  | -0.007569375 | 0.985487863 |
| ENSG000000197170  | PSMD12     | 3.975985229  | -0.079723561 | -0.108944415 | 0.029220854  | 0.999933887 | -0.253274598 | -0.249211928 | -0.004062669 | 0.98553944  |
| ENSG000000158106  | RHPN1      | 2.657242884  | 0.093450718  | 0.208384397  | -0.11493368  | 0.999933887 | 0.08884639   | 0.094413838  | -0.005567448 | 0.98553944  |
| ENSG000000118855  | MFSD1      | 6.859063974  | 0.050824875  | 0.046198965  | 0.00462631   | 0.999933887 | -0.202614314 | -0.199040564 | -0.00357375  | 0.98553944  |
| ENSG000000129084  | PSMA1      | 3.18068917   | -0.031900851 | -0.043400538 | 0.011499687  | 0.999933887 | 0.000180758  | 0.003958496  | -0.003777738 | 0.98553944  |
| ENSG000000180304  | OAZ2       | 8.112090409  | -0.018082863 | -0.039579528 | 0.021496665  | 0.999933887 | 0.297656225  | 0.003060559  | -0.00360559  | 0.98553944  |
| ENSG000000146350  | TBC1D32    | -0.037935957 | 0.034023265  | 0.183359699  | -0.149336435 | 0.999933887 | 0.142977611  | 0.1311797    | 0.011797911  | 0.98553944  |
| ENSG000000196656  | AC004057.1 | -0.921266914 | 0.026808655  | -0.281186378 | 0.307995033  | 0.999933887 | 0.119008007  | 0.015196504  | -0.00195504  | 0.98553944  |
| ENSG000000246084  | LINC02325  | -0.197754149 | -0.119658907 | -0.34170305  | 0.222044142  | 0.999933887 | -0.537597972 | -0.548508784 | 0.010910812  | 0.985569813 |
| ENSG000000116641  | DOCK7      | 0.336884947  | 0.042399322  | -0.025591633 | 0.067990955  | 0.999933887 | -0.171979156 | -0.182163394 | 0.010184237  | 0.985569813 |
| ENSG000000005810  | MYCBP2     | 5.994501639  | 0.022231998  | -0.055386517 | 0.077620515  | 0.999933887 | -0.422111576 | -0.058262355 | -0.005826355 | 0.985606763 |
| ENSG000000204161  | TMEM273    | 6.520293358  | 0.107012461  | 0.145079714  | -0.038067253 | 0.999933887 | -0.665718713 | -0.661162548 | -0.004556165 | 0.985699124 |
| ENSG000000119396  | RAB14      | 5.715953109  | -0.135179584 | -0.043136523 | -0.092014061 | 0.999933887 | -0.350000129 | -0.352562822 | -0.002562693 | 0.985810514 |
| ENSG000000273837  | AC018755.4 | 2.599814504  | -0.069009378 | -0.093040667 | 0.023995288  | 0.999933887 | 0.617200848  | 0.622756642  | -0.005555794 | 0.985810514 |
| ENSG000000159063  | ALG8       | 0.591939153  | -0.102440215 | -0.003982766 | -0.098457451 | 0.999933887 | 0.14733486   | 0.138139834  | 0.009195026  | 0.985810514 |
| ENSG000000085998  | POMGNT1    | 2.203703368  | -0.011072813 | -0.031764062 | 0.020691249  | 0.999933887 | 0.150047581  | 0.154876788  | -0.004829206 | 0.985899211 |
| ENSG000000185761  | ADAMTSL5   | -0.741865501 | -0.115436754 | -0.115821939 | 0.000385184  | 0.999933887 | 0.34888086   | 0.334582215  | 0.014298645  | 0.986009643 |
| ENSG000000183691  | NOG        | -0.826344647 | 0.032797374  | -0.349243768 | 0.382041142  | 0.999933887 | -0.089455059 | -0.080686525 | -0.008766533 | 0.986009643 |
| ENSG000000144231  | POLR2D     | 2.374272958  | -0.002066525 | 0.046687893  | -0.046954418 | 0.999933887 | -0.092132972 | -0.087281493 | -0.004851479 | 0.986009643 |
| ENSG000000052723  | SIKE1      | 3.138934245  | 0.101773554  | -0.073382329 | 0.175155883  | 0.999933887 | -0.347699688 | -0.06005421  | 0.986152596  | 0.986152596 |
| ENSG000000103018  | CYBB5      | 3.136432815  | -0.073445382 | 0.077002735  | -0.150448117 | 0.999933887 | 0.018918034  | 0.022918531  | -0.004000497 | 0.98657563  |
| ENSG000000166987  | MBD6       | 7.892231969  | 0.067898664  | 0.087687743  | -0.019789079 | 0.999933887 | -0.100210886 | -0.102333007 | 0.002122122  | 0.986630673 |
| ENSG000000166441  | RPL27A     | 7.832719384  | -0.01528838  | -0.052888146 | 0.037299765  | 0.999933887 | 0.093984844  | 0.096907282  | -0.002922438 | 0.986695656 |
| ENSG000000109943  | CRTAM      | 2.60796581   | -0.091621174 | -0.143968438 | 0.052347264  | 0.999933887 | 0.020362052  | 0.015326051  | 0.005036002  | 0.986800084 |
| ENSG000000140009  | ESR2       | 0.981304609  | 0.011587995  | 0.013066093  | -0.001480097 | 0.999933887 | -0.335139347 | -0.323589384 | -0.011549963 | 0.986800084 |
| ENSG000000163462  | TRIM46     | 0.446841017  | 0.108027193  | 0.250263723  | -0.14223653  | 0.999933887 | 0.018921449  | 0.027371091  | -0.008449642 | 0.987005854 |
| ENSG000000069966  | GNB5       | 2.240290908  | -0.010688237 | 0.073077633  | -0.08376587  | 0.999933887 | -0.022842578 | -0.00470731  | 0.987005854  | 0.987005854 |
| ENSG000000105289  | TJP3       | 0.397220905  | 0.176171609  | 0.016307708  | 0.159863901  | 0.999933887 | 0.203465318  | 0.195123898  | 0.008341419  | 0.987094645 |
| ENSG000000131089  | ARHGEF9    | 1.722969207  | -0.095684888 | -0.063603722 | -0.032081166 | 0.999933887 | 0.041065997  | 0.035867899  | 0.005198097  | 0.987204521 |
| ENSG000000229868  | ALN31825.1 | 0.219017776  | -0.123986669 | 0.003912874  | -0.127899543 | 0.999933887 | 0.732901211  | 0.719658965  | 0.013242245  | 0.987204521 |
| ENSG000000280052  | AC023813.3 | -0.400209157 | -0.093259347 | -0.195873049 | 0.102613702  | 0.999933887 | 1.824429167  | 1.815832359  | 0.008596808  | 0.987271885 |
| ENSG000000069920  | MAST4      | 2.856959251  | -0.05390486  | -0.068623034 | 0.014718174  | 0.999933887 | 0.148613504  | 0.03973751   | 0.003975754  | 0.987274323 |
| ENSG000000174600  | CMKLR1     | -0.07115812  | 0.005261459  | 0.108462515  | -0.103201056 | 0.999933887 | -0.157795867 | -0.148556826 | -0.009239041 | 0.98730564  |
| ENSG000000128739  | SNRPN      | 0.144536106  | -0.121920493 | 0.432916973  | -0.554837467 | 0.999291887 | 0.075191399  | 0.066322823  | 0.008686576  | 0.98733875  |
| ENSG000000277767  | AL442128.2 | -0.291421341 | 0.05756166   | -0.089673202 | 0.147234862  | 0.999933887 | 0.868859889  | 0.879525032  | -0.010665144 | 0.98733875  |
| ENSG000000101928  | MOSPD1     | 2.09988413   | -0.113206661 | -0.115947095 | 0.002740434  | 0.999933887 | -1.404585163 | -1.409886069 | 0.005300906  | 0.987342065 |
| ENSG000000173200  | PARP15     | 3.705163201  | -0.100293028 | -0.071189655 | -0.029103463 | 0.999933887 | -0.047658153 | -0.043803079 | -0.003855074 | 0.987695001 |
| ENSG000000001631  | KRIT1      | 0.673605476  | -0.107197866 | -0.157091426 | 0.04989356   |             |              |              |              |             |

|                  |            |              |              |              |              |             |              |               |              |             |
|------------------|------------|--------------|--------------|--------------|--------------|-------------|--------------|---------------|--------------|-------------|
| ENSG00000258741  | H2AZ2P1    | -0.630654618 | -0.242833831 | -0.064608666 | -0.178225165 | 0.999933887 | 0.56409488   | 0.555485466   | 0.008609415  | 0.988887326 |
| ENSG00000105173  | CCNE1      | -0.561577834 | 0.150494777  | 0.147190538  | 0.003304239  | 0.999933887 | 0.246385839  | 0.256621124   | -0.010235284 | 0.988902054 |
| ENSG00000168062  | BATF2      | 0.981767264  | 0.072793521  | 0.07825817   | -0.005464649 | 0.999933887 | -0.334709852 | 0.343591022   | 0.008881169  | 0.989061967 |
| ENSG00000128731  | HERC2      | 4.085534498  | 0.032850316  | -0.025512608 | 0.058362924  | 0.999933887 | 0.001666202  | 0.005059939   | -0.003393737 | 0.989061967 |
| ENSG00000163468  | CC73       | 3.942871416  | -0.017823598 | -0.060982729 | 0.043159131  | 0.999933887 | 0.140498652  | 0.143250302   | -0.00275165  | 0.989061967 |
| ENSG00000163644  | PPM1K      | 3.274429651  | -0.021110907 | -0.160500113 | 0.139389106  | 0.999933887 | -0.020797702 | -0.017463718  | -0.003333984 | 0.989061967 |
| ENSG00000279608  | AL353795.3 | 0.273185021  | -0.042820752 | -0.248268848 | 0.205448096  | 0.999933887 | -0.102075523 | 0.111232569   | 0.009157036  | 0.989061967 |
| ENSG00000151552  | QDPR       | 0.625426799  | 0.090448806  | 0.161384186  | -0.07093538  | 0.999933887 | 0.183204414  | 0.177114268   | 0.006090146  | 0.989084636 |
| ENSG00000179242  | CDH4       | -0.167714623 | -0.105187725 | -0.016216009 | -0.088971716 | 0.999933887 | -0.296549445 | -0.287488585  | -0.00906086  | 0.989084636 |
| ENSG00000245954  | LINC02273  | 0.013305548  | 0.040953485  | 0.08704058   | -0.046087095 | 0.999933887 | 0.014231098  | 0.021700711   | -0.007469073 | 0.989084636 |
| ENSG00000158586  | DMTN       | 1.553682895  | -0.033159383 | 0.032663097  | -0.065822479 | 0.999933887 | 0.019928217  | 0.025925633   | -0.005997416 | 0.989101757 |
| ENSG00000188002  | AC026412.1 | 2.106341764  | 0.116037784  | 0.053837704  | 0.062200079  | 0.999933887 | 0.294493608  | 0.299135167   | -0.004641559 | 0.989605168 |
| ENSG00000203666  | EFCAB2     | 0.982328679  | -0.099886925 | -0.010138039 | -0.089748886 | 0.999933887 | -0.055170914 | -0.061099706  | 0.005928792  | 0.989767273 |
| ENSG00000110801  | PSMD9      | 1.583718142  | 0.1591494    | 0.014011339  | 0.145138061  | 0.999933887 | -0.194216164 | -0.199921508  | 0.005705345  | 0.989932748 |
| ENSG000002078070 | MCCC1      | 1.498602562  | -0.090501095 | -0.114872958 | 0.024371863  | 0.999933887 | 0.107878731  | 0.111776546   | -0.003897815 | 0.990010677 |
| ENSG00000256591  | AP003108.2 | 1.074806714  | 0.128678292  | -0.046106966 | 0.174785258  | 0.999933887 | -0.007775672 | -0.001091435  | -0.00684237  | 0.990034278 |
| ENSG00000145390  | USP53      | 2.156227451  | -0.0605892   | -0.256771987 | 0.196182787  | 0.999933887 | -0.385071288 | -0.379435995  | -0.005635293 | 0.990034278 |
| ENSG00000160282  | FTCD       | -1.421021437 | 0.110469489  | 0.471662315  | -0.361192826 | 0.999933887 | 1.012956131  | 1.022200563   | -0.009244432 | 0.990034278 |
| ENSG00000243364  | EFNA4      | 0.490608696  | -0.006554546 | 0.073426135  | -0.079908602 | 0.999933887 | -0.357335593 | -0.351258816  | -0.006076777 | 0.990034278 |
| ENSG00000142657  | PGD        | 7.785338216  | -0.023781664 | -0.013398327 | -0.010383337 | 0.999933887 | -0.002395316 | 0.000110771   | -0.002506087 | 0.990455386 |
| ENSG00000206341  | HLA-H      | 8.040472328  | 0.072737454  | 0.025423444  | 0.047314009  | 0.999933887 | 0.326041874  | 0.323678536   | 0.002363337  | 0.990486293 |
| ENSG00000154124  | OTULIN     | 5.0442299543 | -0.06933736  | -0.017808459 | -0.087145819 | 0.999933887 | -0.168459509 | -0.170709315  | 0.002249806  | 0.990491989 |
| ENSG00000149929  | HIRIP3     | 0.959466407  | 0.094190131  | 0.310723849  | -0.216533718 | 0.999933887 | 0.174038449  | 0.180438653   | -0.006400204 | 0.990491989 |
| ENSG00000105085  | MED26      | 3.103717491  | 0.022992149  | 0.086567528  | -0.063575379 | 0.999933887 | 0.189310286  | 0.186354454   | 0.002955832  | 0.990491989 |
| ENSG00000166343  | MSS51      | 0.497361553  | -0.130035369 | 0.139819802  | -0.269855171 | 0.999933887 | -0.076971758 | -0.071555244  | -0.005416515 | 0.99057037  |
| ENSG00000072401  | UBE2D1     | 5.734016277  | 0.02208349   | 0.029533558  | -0.007450068 | 0.999933887 | -0.188719364 | -0.18665095   | -0.002158414 | 0.99057037  |
| ENSG00000237483  | RPS27AP8   | -0.448230464 | -0.162169439 | 0.353604438  | -0.515773877 | 0.999933887 | 1.8227468    | 1.831801833   | -0.009055034 | 0.990641715 |
| ENSG00000110455  | ACCS       | 1.622592841  | 0.106990332  | -0.124651298 | 0.23164163   | 0.999933887 | -0.009802094 | -0.013871772  | 0.004069678  | 0.990655949 |
| ENSG00000159753  | CARMIL2    | 4.069161452  | 0.06786344   | 0.159381947  | -0.091498507 | 0.999933887 | 1.119646238  | -0.021964283  | -0.002317955 | 0.990655949 |
| ENSG00000087448  | KLHL42     | 1.411105682  | -0.063422721 | -0.163636097 | 0.100213376  | 0.999933887 | -0.100071644 | -0.096141147  | -0.003930497 | 0.990655949 |
| ENSG00000111615  | KRR1       | 3.419921376  | -0.029854264 | -0.058903987 | 0.029076723  | 0.999933887 | -0.186340475 | -0.180391827  | -0.005948648 | 0.990772119 |
| ENSG00000169564  | PCBP1      | 6.336777308  | 0.075637291  | 0.010963778  | 0.064673513  | 0.999933887 | -0.081077358 | -0.07820395   | -0.002873407 | 0.990772949 |
| ENSG00000275834  | AC084368.1 | -0.660787536 | 0.379993177  | 0.331414928  | 0.042578248  | 0.999933887 | 0.793943129  | 0.782539738   | 0.011403391  | 0.990860063 |
| ENSG00000239503  | MARK2P8    | 3.839013444  | 0.223255004  | 0.198082789  | 0.027172215  | 0.999933887 | 0.853338095  | 0.848461033   | 0.004877062  | 0.990967569 |
| ENSG00000101442  | ACTR5      | 2.10182889   | -0.018598201 | 0.034614564  | -0.053212765 | 0.999933887 | 0.01640593   | 0.013030728   | 0.003375202  | 0.991140312 |
| ENSG00000260923  | LINC02193  | -1.210672172 | 0.051655441  | 0.084002287  | -0.032346846 | 0.999933887 | 0.415224781  | 0.405672033   | 0.009552748  | 0.991187827 |
| ENSG00000154511  | DIPK1A     | 0.588011034  | -0.039817898 | -0.188308881 | 0.148542983  | 0.999933887 | 0.118577907  | 0.124404647   | -0.005826741 | 0.991277682 |
| ENSG00000138071  | ACTR2      | 8.507673792  | -0.093000474 | -0.054263761 | -0.038736713 | 0.999933887 | -0.329788889 | -0.331732061  | 0.001943172  | 0.99165002  |
| ENSG00000115138  | POMC       | 0.006542579  | 0.236029689  | 0.215396272  | 0.020633417  | 0.999933887 | 0.035125387  | 0.029225311   | 0.005900077  | 0.99165002  |
| ENSG00000142459  | EVI5L      | 2.079274018  | 0.123152143  | 0.196199183  | -0.07304704  | 0.999933887 | 0.18405154   | 0.179698191   | 0.004152425  | 0.99165002  |
| ENSG00000110704  | HFE        | 0.489287046  | 0.149799963  | -0.040620362 | 0.190402324  | 0.999933887 | -0.250676791 | -0.2506822916 | 0.99165002   | 0.99165002  |
| ENSG00000173064  | HECTD4     | 5.128382196  | 0.045046095  | 0.086735719  | -0.041689624 | 0.999933887 | -0.103149342 | -0.105001853  | 0.001852511  | 0.99165002  |
| ENSG0000013725   | CD6        | 6.370701314  | 0.038110812  | 0.022001551  | 0.016109261  | 0.999933887 | 0.150801397  | 0.152715957   | -0.00191456  | 0.99165002  |
| ENSG00000161513  | FDXR       | 0.961938118  | -0.097437536 | 0.116333303  | -0.211070839 | 0.999933887 | 0.100764656  | 0.105798794   | -0.005034138 | 0.99165002  |
| ENSG00000170919  | TPT1-AS1   | 3.485863975  | -0.039785193 | 0.035666131  | -0.075446503 | 0.999933887 | -0.090549075 | -0.087981273  | -0.002567802 | 0.99165002  |
| ENSG00000272667  | AC012306.2 | 0.385206345  | 0.094701934  | -0.038031898 | 0.133003832  | 0.999933887 | -0.096895268 | -0.095152639  | -0.005369629 | 0.99165002  |
| ENSG00000277072  | STAG3L2    | 1.690617175  | -0.035856279 | -0.060905563 | 0.025320284  | 0.999933887 | 0.098074779  | 0.101561838   | -0.003487059 | 0.99165002  |
| ENSG00000230923  | LINC00309  | -0.809210948 | 0.068533644  | 0.359335928  | -0.290802284 | 0.999933887 | 1.45090477   | 1.4400007396  | 0.010897374  | 0.99165002  |
| ENSG00000183837  | PNMA3      | -0.259586258 | -0.044315121 | 0.071561537  | -0.115876657 | 0.999933887 | -0.045856029 | -0.039747083  | -0.006108946 | 0.99165002  |
| ENSG00000174944  | P2RY14     | 3.571363339  | 0.01894501   | -0.145905984 | 0.164850995  | 0.999933887 | -0.266341959 | -0.269624875  | 0.003282916  | 0.99165002  |
| ENSG00000287040  | AL590506.5 | 0.099503789  | 0.027841216  | 0.040595677  | -0.012754462 | 0.999933887 | -0.120814445 | -0.110842676  | -0.009971768 | 0.99165002  |
| ENSG00000250966  | H3P14      | -0.024659672 | 0.033684208  | 0.210350707  | -0.244041278 | 0.999933887 | -0.185435061 | -0.192490083  | 0.007055022  | 0.99165002  |
| ENSG00000173852  | DPY19L1    | 1.801238476  | 0.020442095  | -0.055220746 | 0.075662842  | 0.999933887 | -0.128226152 | -0.124089854  | -0.004136297 | 0.99165002  |
| ENSG00000123810  | B9D2       | 3.197818624  | -0.012982082 | 0.001314323  | -0.014306405 | 0.999933887 | -0.010841865 | -0.007561609  | -0.003280256 | 0.99165002  |
| ENSG00000150433  | TMEM218    | 2.212024989  | 0.001525242  | 0.008199304  | -0.006674062 | 0.999933887 | -0.10194275  | -0.104528718  | 0.002585968  | 0.99165002  |
| ENSG000000685978 | YBX1       | 7.899446576  | 0.037641073  | 0.001231713  | 0.038872786  | 0.999933887 | -0.03543685  | -0.003881512  | -0.001555338 | 0.991684703 |
| ENSG00000282780  | TRB1J-6    | 0.490085644  | -0.113369813 | -0.007080948 | -0.106288865 | 0.999933887 | 0.136985801  | 0.132330532   | 0.004655269  | 0.992043528 |
| ENSG00000124216  | SNAI1      | -0.106426959 | 0.162846715  | 0.378678036  | -0.215831321 | 0.999933887 | -0.357320924 | -0.00881592   | 0.002106195  | 0.992106195 |
| ENSG00000069424  | CKNAB2     | 9.250966004  | 0.081695149  | 0.063390904  | 0.018304245  | 0.999933887 | -0.439374366 | -0.441610487  | 0.00223612   | 0.992165145 |
| ENSG00000265996  | MIR3671    | 0.5292288132 | -0.082510397 | -0.060618648 | -0.021891749 | 0.999933887 | 0.180765565  | 0.18438618    | -0.003260215 | 0.992282432 |
| ENSG00000136143  | SUCLA2     | 1.033467907  | -0.185650987 | -0.206771183 | 0.021120844  | 0.999933887 | -0.274576888 | -0.27906708   | 0.004490192  | 0.992412021 |
| ENSG00000070756  | PABPC1     | 9.515610719  | -0.019573332 | -0.048105607 | 0.028532275  | 0.999933887 | -0.002898013 | -0.001703246  | -0.001194766 | 0.992412021 |
| ENSG00000105619  | TFPT       | 1.747094599  | -0.052064122 | 0.026998327  | -0.079062444 | 0.999933887 | -0.176850502 | -0.173651342  | -0.00319916  | 0.992412021 |
| ENSG00000117984  | CTSD       | 9.130266227  | -0.031028276 | -0.033813352 | 0.002785076  | 0.999933887 | -0.388407067 | -0.386477893  | -0.001929284 | 0.992412021 |
| ENSG00000179978  | NAIP2      | 0.982267943  | -0.016548694 | 0.030193087  | -0.046741781 | 0.999933887 | -0.676305035 | -0.680698684  | 0.00439366   | 0.992412021 |
| ENSG00000179967  | PPP1R14BP3 | 1.57684555   | 0.170637283  | 0.032095669  | 0.138541614  | 0.999933887 | 0.644130172  | 0.647644582   | -0.00351441  | 0.992417691 |
| ENSG00000264573  | RN7SL15P   | 9.9155e-05   | 0.296514333  | 0.131091906  | 0.165422428  | 0.999933887 | 0.726135308  | 0.718909801   | 0.006325507  | 0.992540742 |
| ENSG00000131508  | UBE2D2     | 6.217045486  | 0.03031948   | 0.035364547  | -0.005045067 | 0.999933887 | -0.065748949 | -0.064283371  | -0.001465577 | 0.992561217 |
| ENSG000000086189 | DIMT1      | 1.651040394  | 0.006808299  | -0.005859962 | 0.126686262  | 0.999933887 | 0.09698774   | 0.094372364   | 0.002615376  | 0.992644653 |
| ENSG00000107290  | SETX       | 7.435668633  | -0.093703778 | -0.155323831 | 0.061620052  | 0.999933887 | -0.908365071 | -0.905542329  | -0.002822741 | 0.992754417 |
| ENSG00000143093  | STRIP1     | 5.403916028  | -0.011535178 | -0.016300996 | 0.004765818  | 0.999933887 | -0.146000032 | -0.147562864  | 0.001562652  | 0.9928      |

|                  |            |              |               |              |              |             |              |              |              |             |
|------------------|------------|--------------|---------------|--------------|--------------|-------------|--------------|--------------|--------------|-------------|
| ENSG00000104133  | SPG11      | 6.400511008  | 0.016605064   | -0.036474777 | 0.053079841  | 0.999933887 | -0.340144586 | -0.341684127 | 0.00153954   | 0.994467381 |
| ENSG00000103485  | QPR1       | 0.991854732  | 0.231264703   | 0.259769226  | -0.028504523 | 0.999933887 | 0.050254945  | 0.055136021  | -0.004881076 | 0.994801436 |
| ENSG00000198821  | CD247      | 5.1461101256 | -0.005639681  | -0.010315613 | 0.004675933  | 0.999933887 | 0.130234771  | 0.0131459161 | -0.00122439  | 0.994801436 |
| ENSG00000144468  | RHBD1      | 2.12028446   | 0.050595005   | 0.028800915  | 0.02179409   | 0.999933887 | -0.029519796 | -0.027472407 | -0.002047389 | 0.994822633 |
| ENSG00000090581  | GNPTG      | 6.332046848  | 0.032411432   | -0.04353406  | 0.075945492  | 0.999933887 | 0.301635081  | 0.300568202  | 0.001068879  | 0.995055185 |
| ENSG00000116580  | GON4L      | 5.582094638  | -0.037173622  | -0.063473244 | 0.026299622  | 0.999933887 | -0.10657156  | -0.107787546 | 0.001215986  | 0.99506074  |
| ENSG00000134444  | RELCH      | 5.04780747   | 0.011899899   | -0.031361534 | 0.043261434  | 0.999933887 | -0.142854449 | -0.410760657 | -0.002097792 | 0.99506074  |
| ENSG00000170631  | ZNF16      | 0.056964164  | -0.123148839  | -0.022087309 | -0.10106153  | 0.999933887 | -0.060150016 | -0.064490086 | 0.004344074  | 0.99518552  |
| ENSG00000164379  | FOXQ1      | -2.09385645  | 0.139052265   | 0.257303922  | -0.118251657 | 0.999933887 | -0.592423466 | -0.585449191 | -0.006974276 | 0.995253198 |
| ENSG00000248019  | FAM13A-AS1 | 4.421380427  | 0.052449016   | -0.029494382 | 0.081912844  | 0.999933887 | -0.551416096 | -0.549329982 | -0.002096114 | 0.995253198 |
| ENSG00000206052  | DOK6       | -0.338126937 | 0.097177448   | 0.091028675  | 0.006148773  | 0.999933887 | -0.046094896 | -0.051098251 | 0.005003355  | 0.995253198 |
| ENSG00000180879  | SSR4       | 4.615981361  | -0.013685755  | -0.081232762 | 0.067547007  | 0.999933887 | 0.079257504  | 0.080361519  | -0.001104015 | 0.995253198 |
| ENSG00000126453  | BCL2L12    | 1.892967114  | 0.008392647   | 0.117190882  | -0.108798235 | 0.999933887 | 0.05065545   | 0.053388705  | -0.002733255 | 0.995253198 |
| ENSG00000174327  | SLC16A13   | 0.365901075  | -0.268058212  | 0.102228852  | -0.370287064 | 0.999933887 | 0.096664336  | 0.094393377  | 0.002270959  | 0.995289108 |
| ENSG00000054179  | ENTPD2     | 0.888806182  | 0.032218642   | 0.072060908  | -0.039842265 | 0.999933887 | -0.09980182  | -0.096293085 | -0.003687097 | 0.995289108 |
| ENSG00000064225  | ST3GAL6    | 5.339634629  | -0.117788141  | -0.129339835 | 0.011551695  | 0.999933887 | -0.479286417 | -0.477739713 | -0.001546704 | 0.995429348 |
| ENSG000000282431 | TRBD1      | -0.971476015 | 0.36233452    | -0.356278756 | 0.718613276  | 0.999933887 | 0.116800375  | 0.112180747  | 0.004619628  | 0.995591112 |
| ENSG000000146670 | CDC45      | -0.810472874 | 0.184199436   | 0.242651701  | -0.058452265 | 0.999933887 | 0.447001424  | 0.452702744  | -0.00570132  | 0.995604373 |
| ENSG000000188636 | RTL6       | 3.13028774   | -0.00609535   | -0.129005684 | 0.122910334  | 0.999933887 | 0.06791972   | 0.069467326  | -0.001547606 | 0.995690868 |
| ENSG000000158715 | SLC45A3    | 0.297552294  | 0.268725007   | 0.185729205  | 0.08295882   | 0.999933887 | -0.07464263  | -0.078708003 | 0.003227452  | 0.995743989 |
| ENSG000000137955 | RABGGTB    | 4.005330011  | -0.08886355   | -0.06726991  | -0.021593639 | 0.999933887 | -0.010449904 | -0.012982622 | -0.001067281 | 0.995826055 |
| ENSG000000081760 | AACS       | 2.014181783  | -0.106384383  | -0.144186322 | 0.037801938  | 0.999933887 | 0.015286503  | 0.017145694  | -0.001859461 | 0.995826055 |
| ENSG00000143546  | S100A8     | 10.180449895 | -0.000171396  | 0.014275348  | -0.014446744 | 0.999933887 | 0.121225332  | 0.122704243  | -0.001478911 | 0.995914868 |
| ENSG000000133316 | WDR74      | 3.417100489  | 0.055007181   | 0.05779185   | -0.002784669 | 0.999933887 | 0.331479394  | 0.330066548  | 0.001412847  | 0.995915732 |
| ENSG000000137502 | RAB30      | 1.900069337  | -0.048393129  | 0.01205486   | -0.060447989 | 0.999933887 | -0.274276397 | -0.276080869 | -0.001804472 | 0.995915732 |
| ENSG000000136811 | ODF2       | 3.506465475  | -0.066296541  | -0.039270843 | -0.027025698 | 0.999933887 | -0.000847071 | 0.000254468  | -0.001101539 | 0.996087514 |
| ENSG000000224152 | AC009506.1 | 2.99986291   | 0.064552042   | 0.083990387  | -0.019438345 | 0.999933887 | -0.431423231 | -0.433103061 | 0.00168074   | 0.996144571 |
| ENSG000000286699 | AC084198.2 | -0.175847096 | 0.090710069   | -0.246963301 | 0.33767337   | 0.999933887 | 0.306905576  | 0.310164343  | -0.003258768 | 0.996144571 |
| ENSG000000163945 | UVSSA      | 5.622285228  | 0.023517449   | 0.039688595  | -0.016168547 | 0.999933887 | 0.085664751  | 0.084696584  | 0.009816617  | 0.996144571 |
| ENSG00000154930  | ACCS1      | 4.047635977  | 0.014212196   | 0.062287621  | -0.048075425 | 0.999933887 | 0.120068706  | 0.118961269  | 0.001107436  | 0.996144571 |
| ENSG000000233762 | RPS15P4    | -0.560911129 | -0.040965124  | -0.145543836 | -0.104578712 | 0.999933887 | -0.057462071 | -0.054064604 | -0.003397467 | 0.996144571 |
| ENSG000000276805 | AL133216.2 | 0.401814852  | -0.022576159  | -0.017326338 | -0.005249821 | 0.999933887 | 0.063391454  | 0.066750443  | -0.002358989 | 0.996144571 |
| ENSG000000270640 | AC104695.3 | 4.361466022  | 0.352544651   | 0.439761569  | -0.087216918 | 0.999933887 | 0.172472764  | 0.170419008  | 0.002053756  | 0.99615725  |
| ENSG000000166847 | DCNT5      | 4.012153487  | -0.059317804  | -0.046611976 | -0.012705828 | 0.999933887 | -0.071313174 | -0.072268407 | 0.000955233  | 0.99615725  |
| ENSG000000269497 | MIR3181    | -0.15115846  | 0.312259175   | 0.403270004  | -0.09101083  | 0.999933887 | 0.155503467  | 0.151699733  | 0.003803734  | 0.996190922 |
| ENSG000000125967 | NECAB3     | 1.18663844   | 0.112525637   | 0.05458705   | 0.057938587  | 0.999933887 | 0.130536627  | 0.132176292  | -0.001639664 | 0.996190922 |
| ENSG000000168806 | LCMT2      | 1.056215746  | 0.050518551   | 0.054788932  | -0.004270381 | 0.999933887 | -0.058957288 | -0.061032932 | 0.002075644  | 0.996190922 |
| ENSG000000174529 | TMEM81     | 0.166153169  | -0.096245039  | -0.125084728 | 0.028839689  | 0.999933887 | -0.368255831 | -0.365457302 | -0.002780228 | 0.996242619 |
| ENSG000000171307 | ZDHHC16    | 1.619484629  | -0.035833761  | 0.038544629  | -0.074380211 | 0.999933887 | 0.055067888  | 0.056534569  | -0.001466471 | 0.996366116 |
| ENSG000000204568 | MRPS18B    | 1.891687173  | -0.030568495  | -0.003502589 | -0.027065907 | 0.999933887 | 0.023950799  | 0.025491768  | -0.001540969 | 0.996416677 |
| ENSG000000203732 | AC016949.1 | 0.559211841  | 0.158248684   | 0.082287307  | 0.075961377  | 0.999933887 | -0.33701122  | -0.333124248 | 0.003886972  | 0.996499459 |
| ENSG000000115540 | RAB5B      | 6.551783253  | -0.045314315  | -0.01363117  | -0.031683146 | 0.999933887 | -0.244548083 | -0.243653667 | -0.000894415 | 0.996499459 |
| ENSG000000161551 | ZNF577     | 0.594569317  | -0.057655619  | -0.113267773 | 0.055612155  | 0.999933887 | -0.090814103 | -0.093007341 | 0.002193238  | 0.996499459 |
| ENSG000000287575 | AL390755.3 | -0.346473675 | -0.05140407   | 0.152646456  | -0.204051156 | 0.999933887 | 2.721452963  | 2.724950063  | -0.0034971   | 0.996499459 |
| ENSG000000265458 | AC132938.3 | -0.005727268 | -0.030647124  | 0.409809064  | -0.439736188 | 0.999933887 | 0.233968652  | 0.23726033   | -0.003291678 | 0.996499459 |
| ENSG000000123870 | ZNF137P    | 0.306712053  | 0.077814492   | 0.141891034  | -0.064076543 | 0.999933887 | -0.437459499 | -0.435079205 | 0.002380294  | 0.996507488 |
| ENSG000000115414 | FN1        | -1.205555653 | -0.388539793  | 0.343078977  | -0.731618769 | 0.999933887 | -0.700952605 | -0.696835119 | -0.004117486 | 0.99656832  |
| ENSG000000112367 | FIG4       | 4.040792622  | -0.0611413152 | 0.083950966  | -0.145364118 | 0.999933887 | -0.530185797 | -0.529353195 | -0.000832602 | 0.99656832  |
| ENSG000000174010 | KLHL15     | 4.081979278  | 0.045784576   | -0.006247217 | 0.052031793  | 0.999933887 | -0.113083661 | -0.111868787 | -0.001214874 | 0.996628165 |
| ENSG000000180822 | PSMG4      | 1.460328472  | -0.019149878  | 0.163065175  | -0.182215053 | 0.999933887 | -0.082495729 | -0.080960348 | -0.001535291 | 0.996628165 |
| ENSG000000184060 | ADAP2      | -0.850441704 | -0.190885474  | 0.270744574  | -0.461632998 | 0.999933887 | -0.971636899 | -0.966830608 | -0.004800381 | 0.996750723 |
| ENSG000000248333 | CDK11B     | 6.544803192  | -0.011438253  | 0.048371572  | -0.03693332  | 0.999933887 | 0.083002432  | 0.083655824  | -0.000653392 | 0.996750723 |
| ENSG000000143801 | PSEN2      | 0.297783879  | 0.2511559811  | 0.343152441  | -0.594712252 | 0.944094537 | 0.099427148  | 0.001957772  | 0.996786307  |             |
| ENSG000000170889 | RPS9       | 9.317002177  | 0.048975323   | 0.004520598  | 0.044454725  | 0.999933887 | 0.052162909  | 0.051433461  | 0.000729448  | 0.996786307 |
| ENSG000000111331 | OAS3       | 6.28575697   | -0.009939705  | -0.001310853 | -0.008628852 | 0.999933887 | -0.061262645 | -0.060325859 | -0.000936786 | 0.996786307 |
| ENSG000000165934 | CPSP2      | 4.039023948  | -0.110921357  | -0.065330486 | -0.045590871 | 0.999933887 | -0.361628516 | -0.360796235 | -0.000832281 | 0.996830554 |
| ENSG000000263676 | MIR4632    | -0.165385582 | 0.361746464   | 0.180273000  | 0.136473456  | 0.999933887 | 0.680557092  | 0.677079511  | 0.003477582  | 0.996861883 |
| ENSG000000191855 | ITGB1BP1   | 3.080699553  | 0.066175029   | 0.044390359  | 0.110565388  | 0.999933887 | -0.043164512 | -0.043991698 | 0.000827186  | 0.996861883 |
| ENSG000000275464 | FP565260.1 | -0.603873777 | 0.102660878   | -0.197581125 | 0.300242003  | 0.999933887 | 0.092168722  | 0.095019753  | -0.002851031 | 0.996861883 |
| ENSG000000071127 | WDR1       | 9.414666589  | 0.013360884   | 0.01147105   | 0.001889834  | 0.999933887 | 0.097421971  | 0.097882128  | -0.000460157 | 0.996861883 |
| ENSG000000233264 | AC006042.2 | -0.478993085 | -0.062084815  | -0.437314134 | 0.375229319  | 0.999933887 | -0.135991246 | -0.132135889 | -0.003855357 | 0.996861883 |
| ENSG000000105887 | MTPN       | 7.172973921  | -0.015151877  | 0.059027438  | -0.074179315 | 0.999933887 | -0.358635683 | -0.357920392 | -0.000715291 | 0.996861883 |
| ENSG000000215126 | CBWD6      | 1.191486065  | -0.003230328  | -0.200721235 | 0.197490406  | 0.999933887 | -0.16822381  | -0.170460387 | 0.002236587  | 0.996861883 |
| ENSG000000116171 | SCP2       | 3.121831183  | 0.000340129   | -0.137512632 | 0.137852761  | 0.999933887 | -0.006965513 | -0.007980578 | 0.0001015245 | 0.996861883 |
| ENSG000000203715 | AC018638.2 | 3.728078395  | 0.081190744   | 0.064772834  | 0.16417911   | 0.999933887 | -0.131971489 | -0.132842356 | 0.000870868  | 0.997012499 |
| ENSG000000255557 | AP001266.2 | 1.332774274  | -0.168844254  | -0.065216584 | -0.10362767  | 0.999933887 | -0.469669653 | -0.467864464 | -0.001805189 | 0.997070945 |
| ENSG000000286638 | AC123595.2 | 0.229071632  | -0.122983954  | 0.489445355  | -0.702429309 | 0.944094537 | 1.075188502  | 1.077075883  | -0.001887381 | 0.997070945 |
| ENSG000000157869 | RAB28      | 2.593349706  | -0.067417332  | -0.004809843 | -0.06260749  | 0.999933887 | 0.00148846   | 0.002429355  | -0.000940895 | 0.997070945 |
| ENSG000000198874 | TYW1       | 2.105451075  | 0.058036904   | -0.056737519 | 0.114774423  | 0.999933887 | 0.111871362  | 0.11091013   | 0.000961232  | 0.997070945 |
| ENSG000000217801 | AL390719.1 | 1.667819276  | 0.0774602     | 0.17062072   | -0.093160562 | 0.999933887 | 0.516086751  | 0.514922301  | 0.00116445   | 0.997070945 |
| ENSG0000         |            |              |               |              |              |             |              |              |              |             |

|                 |                 |              |              |              |              |             |              |              |              |             |
|-----------------|-----------------|--------------|--------------|--------------|--------------|-------------|--------------|--------------|--------------|-------------|
| ENSG00000143156 | <i>NME7</i>     | 0.132732804  | -0.003097129 | -0.068415622 | 0.065318493  | 0.999933887 | -0.070552433 | -0.071468207 | 0.000915774  | 0.998713288 |
| ENSG00000167676 | <i>PLIN4</i>    | 5.132123838  | 0.070833053  | 0.061167771  | 0.009665282  | 0.999933887 | 0.242808403  | 0.242601209  | 0.000207194  | 0.999189691 |
| ENSG00000172469 | <i>MANEA</i>    | -0.189229342 | 0.177192932  | -0.172586593 | 0.349779524  | 0.999933887 | -0.160833765 | -0.160346107 | -0.000487658 | 0.999189691 |
| ENSG00000198042 | <i>MAK16</i>    | 1.143506695  | -0.133175329 | -0.245586344 | 0.112411016  | 0.999933887 | -0.041644247 | -0.041869868 | 0.000225622  | 0.999212988 |
| ENSG00000172081 | <i>MOB3A</i>    | 8.544392904  | -0.083218534 | -0.082135677 | -0.001082857 | 0.999933887 | -0.249471067 | -0.24960789  | 0.000136823  | 0.999212988 |
| ENSG00000031003 | <i>FAM13B</i>   | 5.307426426  | -0.050091322 | -0.039643422 | -0.0104479   | 0.999933887 | -0.440858457 | -0.440745349 | -0.000113108 | 0.999212988 |
| ENSG00000166860 | <i>ZBTB39</i>   | 1.604299869  | 0.047997544  | 0.09498957   | -0.046992026 | 0.999933887 | 0.143790793  | 0.144007818  | -0.000217026 | 0.999212988 |
| ENSG00000115875 | <i>SRSF7</i>    | 6.368229192  | -0.024615473 | 0.000305528  | -0.024921001 | 0.999933887 | 0.213481188  | 0.213578811  | -9.7623e-05  | 0.999212988 |
| ENSG00000089169 | <i>RPH3A</i>    | 1.237995935  | -0.03066896  | -0.007834622 | -0.022834338 | 0.999933887 | -0.341116339 | -0.341412324 | 0.000295985  | 0.999212988 |
| ENSG00000176915 | <i>ANKLE2</i>   | 6.243385322  | 0.003266403  | 0.031517499  | -0.028251096 | 0.999933887 | 0.804094635  | 0.804244774  | -0.000150138 | 0.999212988 |
| ENSG00000163590 | <i>PPM1L</i>    | 1.362260688  | -0.037937884 | -0.014934189 | -0.023003694 | 0.999933887 | -0.043916893 | -0.043794189 | -0.000122704 | 0.999701    |
| ENSG00000204634 | <i>TBC1D8</i>   | 3.304883736  | 0.028249195  | 0.028036464  | 0.00021273   | 0.999933887 | 0.275724986  | 0.275691925  | 3.306e-05    | 0.999878408 |
| ENSG00000224467 | <i>TANK-AS1</i> | 0.645760415  | 0.252398053  | 0.697448702  | -0.445050649 | 0.999933887 | 1.290038005  | 1.290078534  | -4.0528e-05  | 0.999904689 |

The overall average expression is shown for all of the groups.

"**HITTIN 1h inf**" and "**HITTIN 6h inf**" show the average log2FC *Mtb* infection compared to the uninfected response for neutrophils from HITTIN after 1 and 6 hours respectively.

"**HIT 1h inf**" and "**HIT 6h inf**" show the average log2FC *Mtb* infection compared to the uninfected response for neutrophils from HIT after 1 and 6 hours respectively.

"**HITTINxHIT 1h inf**" and "**HITTINxHIT 6h inf**" is the average log2FC response difference between neutrophils from HITTIN and HIT in response to *Mtb* infection at 1 hour and 6 hours respectively (interaction test).

"**Adj.P.Value**" is the adjusted p-value after the Benjamini Hochberg correction for multiple testing shown for both the 1 and 6 hour interaction tests

Significant genes were defined as genes with an absolute log2FC  $\geq 0.2$  and adjusted p value  $\leq 0.05$
